# Supplementary material for: Expression analysis of genes related to cold tolerance in Dendroctonus valens
Source: PeerJ. 2021 Mar 9;9:e10864. doi: 10.7717/peerj.10864 (PMC7953874; doi:10.7717/peerj.10864)
Supplement: Supplemental Information 6 [file peerj-09-10864-s006.xlsx]

## Sheet: nr_annotation
Gene_id	Hit-Name	Description	HSP-Length	E-Value	Score	Identity(%)	Similarity(%)
TRINITY_DN4656_c0_g1	XP_022089492.1	40S ribosomal protein S20-like [Acanthaster planci]	47	5.2e-13	197	76.6	93.6
TRINITY_DN26148_c1_g3	ERL94238.1	hypothetical protein D910_11519, partial [Dendroctonus ponderosae]	210	9.5e-117	1102	100	100
TRINITY_DN11412_c0_g1	ENN70361.1	hypothetical protein YQE_12869, partial [Dendroctonus ponderosae]	111	9.1e-43	455	82.9	82.9
TRINITY_DN31994_c0_g1	XP_018568341.1	uncharacterized protein LOC108908706 [Anoplophora glabripennis]	87	2e-24	296	64.4	80.5
TRINITY_DN21795_c0_g1	XP_019755699.1	PREDICTED: zinc finger protein 816-like [Dendroctonus ponderosae]	175	2.4e-76	750	84	90.3
TRINITY_DN26779_c0_g3	ENN71726.1	hypothetical protein YQE_11649, partial [Dendroctonus ponderosae]	904	0	3442	77.3	81.3
TRINITY_DN20372_c0_g2	XP_019759558.1	PREDICTED: uncharacterized protein LOC109537337 [Dendroctonus ponderosae]	69	1.4e-28	331	92.8	95.7
TRINITY_DN23907_c1_g2	XP_026819337.1	uncharacterized protein LOC113558003 [Rhopalosiphum maidis]	50	2.9e-06	146	52	70
TRINITY_DN22083_c0_g1	ENN79952.1	hypothetical protein YQE_03599, partial [Dendroctonus ponderosae] >ERL92804.1 hypothetical protein D910_10112 [Dendroctonus ponderosae]	29	3e-08	162	100	100
TRINITY_DN20256_c0_g1	XP_023024401.1	polycystic kidney disease protein 1-like 3 [Leptinotarsa decemlineata]	145	2.8e-06	143	36.6	44.8
TRINITY_DN26459_c2_g2	KMQ95932.1	endonuclease-reverse transcriptase [Lasius niger]	78	1.7e-20	263	59	83.3
TRINITY_DN25957_c0_g1	XP_019753934.1	PREDICTED: condensin complex subunit 1 [Dendroctonus ponderosae]	1163	0	5147	89.3	93
TRINITY_DN26250_c0_g2	XP_019753376.1	PREDICTED: activin receptor type-2A [Dendroctonus ponderosae]	524	1.1e-266	2395	84.9	88.2
TRINITY_DN22017_c3_g1	ERL88841.1	hypothetical protein D910_06223 [Dendroctonus ponderosae]	699	3.9e-233	2104	64.8	67.2
TRINITY_DN24742_c0_g2	XP_019758407.1	PREDICTED: sorting nexin-27 [Dendroctonus ponderosae] >XP_019758408.1 PREDICTED: sorting nexin-27 [Dendroctonus ponderosae]	507	6.8e-295	2636	98.8	99.2
TRINITY_DN34790_c0_g1	RZC33191.1	RVT 1 domain containing protein, partial [Asbolus verrucosus]	159	2.7e-08	160	31.4	50.3
TRINITY_DN27477_c2_g2	XP_019768837.1	PREDICTED: rho guanine nucleotide exchange factor 18 isoform X1 [Dendroctonus ponderosae]	1456	0	6728	97.9	98.4
TRINITY_DN22998_c0_g4	XP_019757470.1	PREDICTED: DDB1- and CUL4-associated factor 10 [Dendroctonus ponderosae] >ENN78601.1 hypothetical protein YQE_04968, partial [Dendroctonus ponderosae]	526	6.5e-272	2437	86.7	92.8
TRINITY_DN23185_c1_g1	GBP01771.1	hypothetical protein EVAR_1415_1 [Eumeta japonica]	88	2.8e-20	263	65.9	71.6
TRINITY_DN26309_c0_g1	XP_019762025.1	PREDICTED: zinc finger protein 598 [Dendroctonus ponderosae]	940	0	3628	90.3	91.9
TRINITY_DN24762_c2_g1	XP_019755477.1	PREDICTED: zinc finger and SCAN domain-containing protein 16-like [Dendroctonus ponderosae] >XP_019755478.1 PREDICTED: zinc finger and SCAN domain-containing protein 16-like [Dendroctonus ponderosae]	122	3.3e-25	304	95.9	98.4
TRINITY_DN21888_c0_g2	RZC40202.1	hypothetical protein BDFB_010555, partial [Asbolus verrucosus]	527	3.9e-139	1293	49	66.4
TRINITY_DN20715_c1_g1	KZR96689.1	Uncharacterized protein APZ42_008836, partial [Daphnia magna]	48	2.1e-14	209	79.2	83.3
TRINITY_DN21923_c0_g3	AAQ96274.1	H3L-like histone, partial [Mus musculus] >AAQ96279.1 H3L-like histone, partial [Hydra vulgaris]	75	1.2e-32	366	100	100
TRINITY_DN12543_c0_g2	AID66461.1	cathepsin B [Micropterus salmoides]	69	1.9e-37	407	98.6	98.6
TRINITY_DN5975_c0_g1	ACI68930.1	Translationally-controlled tumor protein homolog [Salmo salar]	71	1.4e-16	227	64.8	78.9
TRINITY_DN25371_c2_g1	XP_019756486.1	PREDICTED: BRISC complex subunit FAM175B-like [Dendroctonus ponderosae]	345	1.5e-141	1315	85.2	89.9
TRINITY_DN16936_c0_g1	XP_019771494.1	PREDICTED: transmembrane channel-like protein 3 isoform X2 [Dendroctonus ponderosae]	41	2.1e-15	218	92.7	97.6
TRINITY_DN21488_c0_g4	XP_019756422.1	PREDICTED: trifunctional enzyme subunit alpha, mitochondrial-like [Dendroctonus ponderosae] >AEE63458.1 unknown [Dendroctonus ponderosae]	369	4.6e-199	1809	95.4	97.8
TRINITY_DN25233_c0_g1	XP_019765194.1	PREDICTED: sodium channel protein para [Dendroctonus ponderosae]	165	5.3e-70	691	97.6	98.8
TRINITY_DN21841_c1_g2	XP_012228171.1	PREDICTED: uncharacterized protein LOC105675530 [Linepithema humile]	79	5.7e-08	156	36.7	60.8
TRINITY_DN23576_c0_g1	XP_019773244.1	PREDICTED: dorsal-ventral patterning protein Sog isoform X2 [Dendroctonus ponderosae]	948	0	4918	97.5	98.8
TRINITY_DN17838_c0_g2	ENN70238.1	hypothetical protein YQE_13022, partial [Dendroctonus ponderosae]	460	1.8e-202	1838	85.9	88
TRINITY_DN22348_c0_g1	XP_019767870.1	PREDICTED: antichymotrypsin-2-like isoform X7 [Dendroctonus ponderosae]	382	3.5e-189	1726	91.9	96.6
TRINITY_DN20797_c0_g1	XP_019765710.1	PREDICTED: uncharacterized protein LOC109541323 isoform X2 [Dendroctonus ponderosae]	566	0	2848	98.1	98.4
TRINITY_DN23113_c0_g2	XP_019765923.1	PREDICTED: innexin inx1 [Dendroctonus ponderosae] >AEE61628.1 unknown [Dendroctonus ponderosae] >ENN73825.1 hypothetical protein YQE_09603, partial [Dendroctonus ponderosae] >ERL89625.1 hypothetical protein D910_06990 [Dendroctonus ponderosae]	284	1.4e-160	1478	96.1	97.5
TRINITY_DN18811_c0_g3	XP_019770265.1	PREDICTED: secretion-regulating guanine nucleotide exchange factor-like [Dendroctonus ponderosae] >XP_019772237.1 PREDICTED: secretion-regulating guanine nucleotide exchange factor-like [Dendroctonus ponderosae] >ENN82271.1 hypothetical protein YQE_01353, partial [Dendroctonus ponderosae] >ENN82410.1 hypothetical protein YQE_01215, partial [Dendroctonus ponderosae] >ERL86770.1 hypothetical protei…	364	1.2e-178	1632	96.2	98.1
TRINITY_DN18059_c0_g1	XP_019755962.1	PREDICTED: glutamate dehydrogenase, mitochondrial-like isoform X2 [Dendroctonus ponderosae]	364	1.9e-195	1776	93.4	97
TRINITY_DN21711_c0_g2	ENN72232.1	hypothetical protein YQE_11095, partial [Dendroctonus ponderosae]	376	6e-184	1678	83	92.8
TRINITY_DN19404_c0_g2	ENN81977.1	hypothetical protein YQE_01688, partial [Dendroctonus ponderosae]	74	8.6e-36	393	97.3	98.6
TRINITY_DN11894_c0_g1	XP_022910529.1	uncharacterized protein LOC111421595 [Onthophagus taurus]	88	5.7e-13	197	39.8	64.8
TRINITY_DN23121_c0_g1	XP_023236470.1	voltage-dependent L-type calcium channel subunit alpha-1C-like, partial [Centruroides sculpturatus]	52	6.1e-07	150	53.8	69.2
TRINITY_DN26521_c0_g2	XP_019756425.1	PREDICTED: katanin p80 WD40 repeat-containing subunit B1 isoform X1 [Dendroctonus ponderosae]	797	0	2900	97.7	98.4
TRINITY_DN27006_c0_g1	XP_019758476.1	PREDICTED: GPI inositol-deacylase [Dendroctonus ponderosae]	1014	0	4524	89.2	92.5
TRINITY_DN23237_c0_g2	XP_019761266.1	PREDICTED: prostaglandin reductase 1-like [Dendroctonus ponderosae]	332	2.6e-172	1581	90.7	95.2
TRINITY_DN21675_c1_g2	XP_019760644.1	PREDICTED: zinc finger protein 268-like [Dendroctonus ponderosae]	83	1.1e-17	246	66.3	72.3
TRINITY_DN24912_c1_g4	XP_019760639.1	PREDICTED: uncharacterized protein LOC109538041 [Dendroctonus ponderosae]	491	3.3e-209	1896	81.1	86.6
TRINITY_DN27163_c4_g1	P16423.1	RecName: Full=Retrovirus-related Pol polyprotein from type-2 retrotransposable element R2DM; AltName: Full=Retrovirus-related Pol polyprotein from type II retrotransposable element R2DM; Includes: RecName: Full=Protease; Includes: RecName: Full=Reverse transcriptase; Includes: RecName: Full=Endonuclease >CAA36225.1 unnamed protein product, partial [Drosophila melanogaster]	1018	5.8e-222	2009	42.3	60
TRINITY_DN21996_c0_g2	ERL95576.1	hypothetical protein D910_12837 [Dendroctonus ponderosae]	146	1.6e-63	639	88.4	93.8
TRINITY_DN25573_c0_g1	XP_019755165.1	PREDICTED: excitatory amino acid transporter 3-like [Dendroctonus ponderosae]	392	3e-201	1830	95.4	97.4
TRINITY_DN20511_c2_g5	XP_019759496.1	PREDICTED: glucose-6-phosphate 1-epimerase-like [Dendroctonus ponderosae] >ENN77241.1 hypothetical protein YQE_06071, partial [Dendroctonus ponderosae]	161	2.4e-83	806	90.7	96.9
TRINITY_DN24936_c2_g1	ENN83482.1	hypothetical protein YQE_00160, partial [Dendroctonus ponderosae]	41	2.3e-14	209	95.1	97.6
TRINITY_DN21773_c0_g1	XP_019765319.1	PREDICTED: nicotinate phosphoribosyltransferase-like [Dendroctonus ponderosae] >XP_019765320.1 PREDICTED: nicotinate phosphoribosyltransferase-like [Dendroctonus ponderosae] >XP_019765321.1 PREDICTED: nicotinate phosphoribosyltransferase-like [Dendroctonus ponderosae] >ENN74206.1 hypothetical protein YQE_09179, partial [Dendroctonus ponderosae] >ERL86165.1 hypothetical protein D910_03578 [Dendroc…	593	7.8e-220	1990	70.7	71.5
TRINITY_DN21656_c0_g1	XP_019768409.1	PREDICTED: serine/arginine-rich splicing factor 1A [Dendroctonus ponderosae] >XP_019768410.1 PREDICTED: serine/arginine-rich splicing factor 1A [Dendroctonus ponderosae] >ENN72312.1 hypothetical protein YQE_11055, partial [Dendroctonus ponderosae]	50	6.1e-16	230	100	100
TRINITY_DN19624_c0_g4	ERL94045.1	hypothetical protein D910_11328 [Dendroctonus ponderosae]	167	1.8e-90	872	98.8	100
TRINITY_DN23579_c0_g4	XP_023311264.1	uncharacterized protein LOC111691946 [Anoplophora glabripennis]	174	2.2e-25	309	42	60.3
TRINITY_DN25623_c1_g1	XP_019761590.1	PREDICTED: asparagine synthetase [glutamine-hydrolyzing] [Dendroctonus ponderosae] >ENN76286.1 hypothetical protein YQE_07249, partial [Dendroctonus ponderosae] >ERL86933.1 hypothetical protein D910_04336 [Dendroctonus ponderosae]	563	0	2934	96.1	98.9
TRINITY_DN23346_c0_g1	XP_019765995.1	PREDICTED: monocarboxylate transporter 12-like [Dendroctonus ponderosae]	718	2.5e-229	2071	65	66.4
TRINITY_DN19759_c0_g2	AEE62411.1	unknown [Dendroctonus ponderosae]	191	9.9e-103	976	99	99.5
TRINITY_DN19762_c0_g1	XP_019762458.1	PREDICTED: BTB/POZ domain-containing protein 17 [Dendroctonus ponderosae] >XP_019762459.1 PREDICTED: BTB/POZ domain-containing protein 17 [Dendroctonus ponderosae] >XP_019762460.1 PREDICTED: BTB/POZ domain-containing protein 17 [Dendroctonus ponderosae] >ENN75730.1 hypothetical protein YQE_07690, partial [Dendroctonus ponderosae]	235	2.9e-130	1214	95.7	98.3
TRINITY_DN19399_c0_g2	ERL87704.1	hypothetical protein D910_05094 [Dendroctonus ponderosae]	104	6e-25	303	60.6	63.5
TRINITY_DN21338_c3_g1	ENN81627.1	hypothetical protein YQE_01990, partial [Dendroctonus ponderosae]	677	1.3e-280	2513	73.1	78.3
TRINITY_DN19957_c0_g1	XP_019757258.1	PREDICTED: uncharacterized protein LOC109535742 isoform X4 [Dendroctonus ponderosae]	425	2.8e-246	2216	97.6	99.3
TRINITY_DN27223_c0_g2	ERL93294.1	hypothetical protein D910_10590 [Dendroctonus ponderosae]	131	2.1e-62	631	97.7	98.5
TRINITY_DN21345_c0_g3	XP_019754115.1	PREDICTED: zinc finger protein Noc-like [Dendroctonus ponderosae]	426	5.9e-216	1955	90.8	93.9
TRINITY_DN13690_c0_g1	XP_014098171.1	PREDICTED: FERM, RhoGEF and pleckstrin domain-containing protein 2 isoform X2 [Bactrocera oleae]	33	2.6e-08	158	87.9	90.9
TRINITY_DN24061_c0_g1	XP_015921708.1	zinc finger BED domain-containing protein 5-like [Parasteatoda tepidariorum]	104	8.9e-34	378	76	80.8
TRINITY_DN10180_c0_g3	XP_507840.2	prosaposin isoform X1 [Pan troglodytes] >XP_008967227.1 prosaposin isoform X1 [Pan paniscus] >XP_018890080.1 PREDICTED: prosaposin isoform X1 [Gorilla gorilla gorilla] >CAI29728.1 hypothetical protein [Pongo abelii]	128	8.6e-68	671	100	100
TRINITY_DN21650_c3_g4	VDK73881.1	unnamed protein product [Litomosoides sigmodontis]	214	1.2e-06	148	25.2	42.1
TRINITY_DN27968_c0_g1	XP_005980731.1	PREDICTED: midasin-like, partial [Pantholops hodgsonii]	69	3.1e-29	338	97.1	97.1
TRINITY_DN22079_c3_g4	ERL86430.1	hypothetical protein D910_03837 [Dendroctonus ponderosae]	489	2.2e-270	2424	93.7	97.3
TRINITY_DN18868_c0_g1	XP_019763587.1	PREDICTED: uncharacterized protein LOC109539951 [Dendroctonus ponderosae]	414	5.3e-180	1644	84.1	88.6
TRINITY_DN18564_c0_g1	XP_019772624.1	PREDICTED: uncharacterized protein LOC109546199 [Dendroctonus ponderosae] >XP_019772625.1 PREDICTED: uncharacterized protein LOC109546199 [Dendroctonus ponderosae] >ENN81998.1 hypothetical protein YQE_01573, partial [Dendroctonus ponderosae] >ERL88548.1 hypothetical protein D910_05933 [Dendroctonus ponderosae]	141	2.6e-58	595	85.8	89.4
TRINITY_DN16533_c0_g1	XP_019770587.1	PREDICTED: sperm flagellar protein 2-like [Dendroctonus ponderosae]	302	2.3e-144	1335	85.4	92.7
TRINITY_DN19749_c0_g1	XP_019765273.1	PREDICTED: very long-chain specific acyl-CoA dehydrogenase, mitochondrial [Dendroctonus ponderosae] >ENN74123.1 hypothetical protein YQE_09096, partial [Dendroctonus ponderosae]	801	8.6e-301	2688	71.7	74.7
TRINITY_DN19322_c4_g1	XP_019763612.1	PREDICTED: coiled-coil domain-containing protein 25 [Dendroctonus ponderosae] >AEE62061.1 unknown [Dendroctonus ponderosae] >ENN75120.1 hypothetical protein YQE_08301, partial [Dendroctonus ponderosae] >ERL84835.1 hypothetical protein D910_02259 [Dendroctonus ponderosae]	207	1e-88	854	97.1	98.6
TRINITY_DN27159_c0_g1	ENN80557.1	hypothetical protein YQE_03022, partial [Dendroctonus ponderosae] >ERL86512.1 hypothetical protein D910_03916 [Dendroctonus ponderosae]	151	2.8e-67	668	90.1	95.4
TRINITY_DN24526_c0_g1	XP_019759102.1	PREDICTED: uncharacterized protein LOC109537027 [Dendroctonus ponderosae]	704	0	3445	98.7	99.4
TRINITY_DN25076_c1_g2	ENN81452.1	hypothetical protein YQE_02145, partial [Dendroctonus ponderosae]	502	4.5e-221	2003	86.7	89.2
TRINITY_DN26538_c0_g2	XP_019758635.1	PREDICTED: uncharacterized protein LOC109536729 isoform X4 [Dendroctonus ponderosae]	604	5.3e-226	2041	73.8	77.5
TRINITY_DN25483_c0_g2	XP_019763375.1	PREDICTED: uncharacterized protein LOC109539807 isoform X2 [Dendroctonus ponderosae]	249	1.2e-120	1133	88.4	91.6
TRINITY_DN24424_c0_g1	ENN77955.1	hypothetical protein YQE_05632, partial [Dendroctonus ponderosae] >ERL85938.1 hypothetical protein D910_03353 [Dendroctonus ponderosae]	83	6.7e-43	464	98.8	98.8
TRINITY_DN9617_c0_g1	CCJ09780.1	putative thiazole biosynthetic enzyme, partial [Hirudo medicinalis]	100	1e-40	437	87	93
TRINITY_DN21981_c1_g4	VDO49980.1	unnamed protein product [Brugia timori]	45	5.2e-10	172	75.6	82.2
TRINITY_DN23286_c1_g3	ERL93526.1	hypothetical protein D910_10815 [Dendroctonus ponderosae]	90	2.2e-12	193	54.4	62.2
TRINITY_DN25050_c0_g1	XP_019759018.1	PREDICTED: zinc finger protein ZPR1 [Dendroctonus ponderosae] >ENN77687.1 hypothetical protein YQE_05837, partial [Dendroctonus ponderosae]	275	1.4e-151	1402	96.4	98.2
TRINITY_DN23156_c0_g8	XP_019768345.1	PREDICTED: succinate dehydrogenase assembly factor 2-A, mitochondrial [Dendroctonus ponderosae] >AEE61668.1 unknown [Dendroctonus ponderosae] >ENN72379.1 hypothetical protein YQE_11014, partial [Dendroctonus ponderosae] >ERL84746.1 hypothetical protein D910_02171 [Dendroctonus ponderosae]	149	3.3e-79	773	96	98
TRINITY_DN24506_c0_g1	ERL93937.1	hypothetical protein D910_11223 [Dendroctonus ponderosae]	48	7.4e-15	220	85.4	89.6
TRINITY_DN20944_c1_g1	XP_019772430.1	PREDICTED: palmitoyl-protein thioesterase 1-like [Dendroctonus ponderosae] >ERL89413.1 hypothetical protein D910_06780 [Dendroctonus ponderosae]	267	2.2e-154	1424	97.4	98.9
TRINITY_DN21969_c1_g8	XP_019756632.1	PREDICTED: uncharacterized protein LOC109535198 [Dendroctonus ponderosae]	538	6.2e-131	1222	54.5	64.3
TRINITY_DN19817_c3_g2	AVA09690.1	putative effector protein [Heterodera avenae]	251	9.8e-111	1045	82.9	90.4
TRINITY_DN26453_c0_g3	XP_019768454.1	PREDICTED: ubiquitin carboxyl-terminal hydrolase 36 [Dendroctonus ponderosae]	215	3.3e-57	583	56.7	70.2
TRINITY_DN22923_c0_g1	ENN75024.1	hypothetical protein YQE_08339, partial [Dendroctonus ponderosae]	446	3.7e-85	827	75.8	78
TRINITY_DN22181_c2_g2	ERL85563.1	hypothetical protein D910_02982 [Dendroctonus ponderosae]	165	7.4e-64	639	73.3	79.4
TRINITY_DN25578_c0_g2	XP_019769112.1	PREDICTED: uncharacterized protein LOC109543723 isoform X2 [Dendroctonus ponderosae]	358	6.1e-146	1349	78.8	84.9
TRINITY_DN24568_c0_g1	XP_019768239.1	PREDICTED: uncharacterized protein LOC109543133 isoform X1 [Dendroctonus ponderosae]	446	8.1e-257	2309	99.1	100
TRINITY_DN26920_c0_g1	XP_019757936.1	PREDICTED: paired amphipathic helix protein Sin3b [Dendroctonus ponderosae] >XP_019757937.1 PREDICTED: paired amphipathic helix protein Sin3b [Dendroctonus ponderosae] >XP_019757938.1 PREDICTED: paired amphipathic helix protein Sin3b [Dendroctonus ponderosae] >XP_019757939.1 PREDICTED: paired amphipathic helix protein Sin3b [Dendroctonus ponderosae]	1424	0	6203	89.8	91.6
TRINITY_DN26574_c0_g6	XP_028153141.1	uncharacterized protein LOC114346599 isoform X1 [Diabrotica virgifera virgifera]	50	8.6e-07	145	58	72
TRINITY_DN26330_c0_g1	ERL87189.1	hypothetical protein D910_04589 [Dendroctonus ponderosae]	463	5.2e-242	2182	91.4	93.7
TRINITY_DN15989_c1_g1	GCF46396.1	hypothetical protein parPi_0006153 [Paroedura picta]	204	2.9e-116	1091	100	100
TRINITY_DN23879_c1_g1	XP_025996276.1	uncharacterized protein LOC113005231 [Solenopsis invicta]	121	1.1e-26	320	52.9	66.9
TRINITY_DN11606_c0_g1	ENN83577.1	hypothetical protein YQE_00068, partial [Dendroctonus ponderosae]	84	1.1e-35	396	100	100
TRINITY_DN26157_c0_g3	OXA44831.1	CGG triplet repeat-binding protein 1 [Folsomia candida]	68	2e-10	174	45.6	72.1
TRINITY_DN26610_c1_g1	AEE61946.1	unknown [Dendroctonus ponderosae]	254	8e-129	1201	90.9	96.1
TRINITY_DN24980_c0_g1	XP_019757581.1	PREDICTED: neurogenic protein mastermind-like [Dendroctonus ponderosae]	356	1.2e-179	1643	92.7	95.2
TRINITY_DN19639_c0_g2	XP_019773590.1	PREDICTED: B-cell receptor-associated protein 31 [Dendroctonus ponderosae] >AEE62501.1 unknown [Dendroctonus ponderosae] >ENN81412.1 hypothetical protein YQE_02183, partial [Dendroctonus ponderosae] >ERL84862.1 hypothetical protein D910_02285 [Dendroctonus ponderosae]	33	1.9e-08	158	100	100
TRINITY_DN23201_c0_g1	XP_019772713.1	PREDICTED: hexosaminidase D-like [Dendroctonus ponderosae]	477	6.3e-147	1359	62.9	68.3
TRINITY_DN25583_c3_g2	EFN73364.1	THAP domain-containing protein 9, partial [Camponotus floridanus]	88	7.8e-20	256	56.8	71.6
TRINITY_DN27382_c0_g3	ENN73351.1	hypothetical protein YQE_10031, partial [Dendroctonus ponderosae]	31	1.9e-06	141	80.6	87.1
TRINITY_DN18407_c0_g1	XP_028136377.1	uncharacterized protein LOC114331107 [Diabrotica virgifera virgifera]	92	1.7e-09	172	48.9	59.8
TRINITY_DN24876_c0_g3	XP_019761120.1	PREDICTED: arginyl-tRNA--protein transferase 1 isoform X2 [Dendroctonus ponderosae] >ENN76469.1 hypothetical protein YQE_06923, partial [Dendroctonus ponderosae]	194	2.2e-103	982	91.2	93.8
TRINITY_DN22948_c0_g3	XP_015839527.1	PREDICTED: CUGBP Elav-like family member 4 isoform X11 [Tribolium castaneum] >KYB25051.1 CUGBP Elav-like family member 4 [Tribolium castaneum]	44	1.6e-15	218	93.2	97.7
TRINITY_DN23544_c0_g2	AAZ67092.1	transposase [Adineta vaga]	222	4.7e-59	599	52.3	69.8
TRINITY_DN23876_c0_g1	XP_019769839.1	PREDICTED: uncharacterized protein LOC109544211 [Dendroctonus ponderosae]	319	1.9e-168	1545	92.8	96.6
TRINITY_DN27410_c0_g2	XP_019765976.1	PREDICTED: uncharacterized protein LOC109541538 [Dendroctonus ponderosae]	205	5.4e-62	625	56.1	75.1
TRINITY_DN28603_c0_g1	ENN71241.1	hypothetical protein YQE_12168, partial [Dendroctonus ponderosae]	88	5.4e-37	404	98.9	98.9
TRINITY_DN15802_c0_g1	NP_003371.2	vimentin [Homo sapiens] >XP_003831224.1 vimentin [Pan paniscus] >XP_006717563.1 vimentin isoform X1 [Homo sapiens] >XP_018890043.1 PREDICTED: vimentin [Gorilla gorilla gorilla] >XP_024109584.1 vimentin [Pongo abelii] >P08670.4 RecName: Full=Vimentin >CAA39600.1 unnamed protein product [Homo sapiens] >AAH00163.2 Vimentin [Homo sapiens] >AAH30573.1 Vimentin [Homo sapiens] >AAN09720.1 CTCL tumor ant…	292	4.3e-138	1281	100	100
TRINITY_DN23241_c0_g2	XP_019767525.1	PREDICTED: COP9 signalosome complex subunit 1 [Dendroctonus ponderosae]	458	5.3e-106	1006	46.3	65.7
TRINITY_DN20064_c3_g1	XP_018572645.1	teneurin-a isoform X1 [Anoplophora glabripennis]	66	2.3e-08	158	59.1	66.7
TRINITY_DN25603_c0_g1	XP_018564436.1	uncharacterized protein LOC108905871 isoform X1 [Anoplophora glabripennis]	577	6.4e-229	2069	69.7	83.2
TRINITY_DN25739_c1_g1	XP_019763600.1	PREDICTED: CAP-Gly domain-containing linker protein 1 isoform X3 [Dendroctonus ponderosae] >XP_019763601.1 PREDICTED: CAP-Gly domain-containing linker protein 1 isoform X3 [Dendroctonus ponderosae]	148	1.6e-39	434	89.2	93.2
TRINITY_DN11658_c0_g1	EFA07205.2	Retrovirus-related Pol polyprotein from transposon 297-like Protein [Tribolium castaneum]	105	4.5e-25	302	60	70.5
TRINITY_DN21087_c3_g6	XP_019770569.1	PREDICTED: DNA polymerase delta small subunit [Dendroctonus ponderosae]	432	6.5e-247	2221	94.9	98.6
TRINITY_DN25087_c2_g3	XP_002435918.1	hypothetical protein IscW_ISCW024385 [Ixodes scapularis] >EEC08748.1 hypothetical protein IscW_ISCW024385, partial [Ixodes scapularis]	40	1.3e-08	160	77.5	80
TRINITY_DN16805_c0_g1	XP_028154208.1	uncharacterized protein LOC114347734 [Diabrotica virgifera virgifera]	112	1.1e-37	411	70.5	84.8
TRINITY_DN21958_c2_g1	ERL89075.1	hypothetical protein D910_06452 [Dendroctonus ponderosae]	99	4.7e-27	321	67.7	82.8
TRINITY_DN19775_c0_g1	ERL84837.1	hypothetical protein D910_02261 [Dendroctonus ponderosae]	280	1.6e-146	1354	93.2	96.8
TRINITY_DN22117_c0_g1	XP_019755113.1	PREDICTED: venom dipeptidyl peptidase 4-like [Dendroctonus ponderosae]	799	0	4000	95.5	97.5
TRINITY_DN25982_c0_g2	XP_019754009.1	PREDICTED: mitogen-activated protein kinase kinase kinase kinase 5 isoform X7 [Dendroctonus ponderosae]	509	1.1e-300	2687	99.2	100
TRINITY_DN24570_c0_g1	XP_019754233.1	PREDICTED: UDP-glucuronosyltransferase 1-7C-like [Dendroctonus ponderosae]	422	2.2e-227	2054	92.4	95.5
TRINITY_DN20921_c0_g3	XP_019875181.1	PREDICTED: lissencephaly-1 homolog [Aethina tumida]	350	5e-95	913	94.6	97.7
TRINITY_DN7221_c0_g2	XP_009062243.1	hypothetical protein LOTGIDRAFT_107140 [Lottia gigantea] >ESO87300.1 hypothetical protein LOTGIDRAFT_107140 [Lottia gigantea]	84	1.5e-15	220	48.8	69
TRINITY_DN21270_c0_g1	KYM97820.1	hypothetical protein ALC62_11487, partial [Cyphomyrmex costatus]	129	1.7e-31	360	54.3	65.9
TRINITY_DN26854_c0_g2	ENN76061.1	hypothetical protein YQE_07433, partial [Dendroctonus ponderosae]	546	2.5e-168	1547	63.6	64.1
TRINITY_DN23870_c0_g2	XP_019756194.1	PREDICTED: atrial natriuretic peptide receptor 1-like [Dendroctonus ponderosae]	272	1.5e-153	1416	100	100
TRINITY_DN20140_c0_g1	XP_019767690.1	PREDICTED: rRNA-processing protein UTP23 homolog [Dendroctonus ponderosae] >ENN72723.1 hypothetical protein YQE_10661, partial [Dendroctonus ponderosae] >ERL91277.1 hypothetical protein D910_08611 [Dendroctonus ponderosae]	134	1.2e-68	682	95.5	97
TRINITY_DN8585_c0_g1	ERL95312.1	hypothetical protein D910_12578 [Dendroctonus ponderosae]	68	1.7e-14	211	58.8	72.1
TRINITY_DN24974_c0_g3	ERL93783.1	hypothetical protein D910_11069 [Dendroctonus ponderosae]	35	1.6e-08	158	82.9	91.4
TRINITY_DN19396_c0_g1	XP_019772893.1	PREDICTED: uncharacterized protein LOC109546384 isoform X1 [Dendroctonus ponderosae]	1569	0	6416	85	89.5
TRINITY_DN22128_c0_g2	ENN70687.1	hypothetical protein YQE_12632, partial [Dendroctonus ponderosae]	61	6.4e-25	303	95.1	96.7
TRINITY_DN27637_c2_g1	XP_019753688.1	PREDICTED: monocarboxylate transporter 7-like isoform X1 [Dendroctonus ponderosae]	627	0	3005	95.5	97.3
TRINITY_DN19991_c0_g1	XP_022835160.1	uncharacterized protein LOC111362674 [Spodoptera litura]	88	1.6e-08	164	39.8	65.9
TRINITY_DN21472_c0_g3	XP_019756958.1	PREDICTED: translation initiation factor eIF-2B subunit alpha [Dendroctonus ponderosae] >ENN78931.1 hypothetical protein YQE_04608, partial [Dendroctonus ponderosae]	37	2.3e-06	142	81.1	89.2
TRINITY_DN11637_c0_g1	RZC32847.1	aldose reductase [Asbolus verrucosus]	93	2.1e-18	244	51.6	69.9
TRINITY_DN21069_c0_g1	ENN81796.1	hypothetical protein YQE_01803, partial [Dendroctonus ponderosae] >ERL88688.1 hypothetical protein D910_06071 [Dendroctonus ponderosae]	152	4.9e-77	755	94.1	98
TRINITY_DN10495_c0_g1	XP_018897737.1	PREDICTED: chalcone synthase 4-like [Bemisia tabaci]	76	8.2e-18	238	57.9	76.3
TRINITY_DN5037_c0_g1	XP_019762055.1	PREDICTED: uncharacterized protein LOC109538994 [Dendroctonus ponderosae]	142	2.4e-61	616	88.7	93.7
TRINITY_DN26926_c0_g1	XP_019758600.1	PREDICTED: extracellular serine/threonine protein CG31145, partial [Dendroctonus ponderosae]	218	2.6e-104	992	93.6	95
TRINITY_DN23521_c0_g1	XP_019756529.1	PREDICTED: ras-related protein M-Ras-like [Dendroctonus ponderosae] >XP_019756530.1 PREDICTED: ras-related protein M-Ras-like [Dendroctonus ponderosae] >AEE63270.1 unknown [Dendroctonus ponderosae] >ENN79184.1 hypothetical protein YQE_04368, partial [Dendroctonus ponderosae] >ERL84909.1 hypothetical protein D910_02332 [Dendroctonus ponderosae]	201	1.3e-107	1020	96	99
TRINITY_DN25272_c1_g1	RZC41876.1	coiled-coil domain-containing protein 142, partial [Asbolus verrucosus]	150	1.4e-43	465	57.3	78.7
TRINITY_DN19405_c0_g1	XP_019767810.1	PREDICTED: uncharacterized protein LOC109542834 isoform X1 [Dendroctonus ponderosae]	248	5.9e-115	1081	88.3	94.4
TRINITY_DN23878_c0_g2	XP_019766830.1	PREDICTED: coatomer subunit gamma [Dendroctonus ponderosae]	870	0	4202	97.4	97.9
TRINITY_DN23168_c0_g1	XP_019760816.1	PREDICTED: phosphoribosylformylglycinamidine synthase [Dendroctonus ponderosae] >XP_019760817.1 PREDICTED: phosphoribosylformylglycinamidine synthase [Dendroctonus ponderosae]	1211	0	5980	94.6	97.2
TRINITY_DN24864_c0_g1	XP_019753775.1	PREDICTED: tyrosine-protein kinase Fer-like [Dendroctonus ponderosae]	380	1.7e-226	2049	98.9	99.5
TRINITY_DN20900_c0_g1	XP_019764255.1	PREDICTED: elongation factor Ts, mitochondrial [Dendroctonus ponderosae] >ENN74820.1 hypothetical protein YQE_08593, partial [Dendroctonus ponderosae] >ERL86096.1 hypothetical protein D910_03510 [Dendroctonus ponderosae]	421	1.6e-150	1390	71	72.7
TRINITY_DN21720_c0_g1	XP_019765288.1	PREDICTED: mitochondrial folate transporter/carrier [Dendroctonus ponderosae] >XP_019765289.1 PREDICTED: mitochondrial folate transporter/carrier [Dendroctonus ponderosae] >ENN74178.1 hypothetical protein YQE_09151, partial [Dendroctonus ponderosae]	398	2.4e-185	1691	82.9	83.7
TRINITY_DN25654_c1_g1	XP_019761400.1	PREDICTED: eukaryotic translation initiation factor 4 gamma 3-like isoform X2 [Dendroctonus ponderosae]	1785	0	6286	79.3	85.3
TRINITY_DN26793_c0_g2	ERL85676.1	hypothetical protein D910_03092 [Dendroctonus ponderosae]	502	1.8e-237	2142	86.9	90
TRINITY_DN22496_c3_g4	XP_019762504.1	PREDICTED: peroxidase-like [Dendroctonus ponderosae]	722	0	3779	97.1	98.1
TRINITY_DN22732_c0_g1	XP_019767515.1	PREDICTED: zinc finger protein 184-like [Dendroctonus ponderosae]	458	1.3e-65	659	69.4	72.5
TRINITY_DN22383_c0_g1	XP_023714374.1	gastrula zinc finger protein XlCGF71.1-like [Cryptotermes secundus]	52	6.6e-06	140	48.1	59.6
TRINITY_DN27549_c0_g1	XP_019764506.1	PREDICTED: la-related protein 6 [Dendroctonus ponderosae]	479	5.3e-235	2121	99.2	99.8
TRINITY_DN24899_c2_g1	GBP02287.1	hypothetical protein EVAR_1727_1 [Eumeta japonica]	108	2e-07	152	41.7	50.9
TRINITY_DN13252_c0_g1	ROI15578.1	40S ribosomal protein S23 [Anabarilius grahami]	127	1.6e-66	660	100	100
TRINITY_DN12296_c0_g1	BAD92830.1	CD68 antigen variant, partial [Homo sapiens]	293	4.7e-162	1487	100	100
TRINITY_DN24171_c0_g4	XP_019766883.1	PREDICTED: uncharacterized protein LOC109542199 isoform X2 [Dendroctonus ponderosae]	94	6.4e-43	459	96.8	96.8
TRINITY_DN20846_c0_g9	AAH82009.1	Heat shock protein 90kDa alpha (cytosolic), class B member 1 [Rattus norvegicus]	418	2.9e-232	2094	100	100
TRINITY_DN31832_c0_g1	AGV06210.1	copper-zinc superoxide dismutase [Protopterus annectens]	68	2.5e-17	234	61.8	82.4
TRINITY_DN21218_c1_g2	XP_019753895.1	PREDICTED: heat shock 70 kDa protein-like isoform X2 [Dendroctonus ponderosae]	615	4.2e-262	2357	75.6	86
TRINITY_DN30613_c0_g1	KZS17020.1	60S ribosomal protein L12 [Daphnia magna]	69	3.1e-24	293	84.1	92.8
TRINITY_DN23030_c2_g4	ERL93177.1	hypothetical protein D910_10474 [Dendroctonus ponderosae]	51	4.1e-14	212	84.3	88.2
TRINITY_DN23374_c0_g3	XP_019757419.1	PREDICTED: dehydrodolichyl diphosphate synthase complex subunit nus1-like [Dendroctonus ponderosae] >ENN78619.1 hypothetical protein YQE_04923, partial [Dendroctonus ponderosae]	263	3.5e-138	1283	90.1	94.7
TRINITY_DN23571_c0_g1	XP_003269038.1	PREDICTED: phosphoglycerate kinase 1 isoform X1 [Nomascus leucogenys]	180	7.5e-94	897	99.4	99.4
TRINITY_DN19574_c0_g1	XP_019771621.1	PREDICTED: esterase E4-like [Dendroctonus ponderosae]	592	7e-306	2730	89.2	92.7
TRINITY_DN22483_c0_g1	XP_019764935.1	PREDICTED: katanin p60 ATPase-containing subunit A-like 1 isoform X1 [Dendroctonus ponderosae] >XP_019764936.1 PREDICTED: katanin p60 ATPase-containing subunit A-like 1 isoform X1 [Dendroctonus ponderosae] >XP_019764937.1 PREDICTED: katanin p60 ATPase-containing subunit A-like 1 isoform X1 [Dendroctonus ponderosae]	517	6.5e-254	2283	95.4	95.7
TRINITY_DN21870_c0_g1	XP_019760207.1	PREDICTED: protein CNPPD1 [Dendroctonus ponderosae] >ENN76978.1 hypothetical protein YQE_06473, partial [Dendroctonus ponderosae] >ERL85479.1 hypothetical protein D910_02898 [Dendroctonus ponderosae]	550	1.2e-201	1831	69.8	70.9
TRINITY_DN21211_c0_g7	EFN86884.1	hypothetical protein EAI_04021, partial [Harpegnathos saltator]	45	7.6e-08	154	62.2	80
TRINITY_DN22166_c0_g2	XP_019772531.1	PREDICTED: beta-1,4-glucuronyltransferase 1-like [Dendroctonus ponderosae]	431	1.6e-244	2204	94.4	97.7
TRINITY_DN21304_c0_g1	XP_019761942.1	PREDICTED: protein penguin [Dendroctonus ponderosae] >ENN75986.1 hypothetical protein YQE_07518, partial [Dendroctonus ponderosae] >ERL90654.1 hypothetical protein D910_08001 [Dendroctonus ponderosae]	424	5e-205	1861	92.5	94.8
TRINITY_DN20107_c1_g2	XP_019766746.1	PREDICTED: adenosine deaminase CECR1-like [Dendroctonus ponderosae]	253	3.4e-132	1231	90.5	95.7
TRINITY_DN20958_c1_g2	KYN03413.1	hypothetical protein ALC62_05805, partial [Cyphomyrmex costatus]	63	3.2e-12	192	54	71.4
TRINITY_DN23148_c1_g2	ENN71366.1	hypothetical protein YQE_11981, partial [Dendroctonus ponderosae]	112	4.8e-35	391	73.2	80.4
TRINITY_DN19041_c0_g1	ENN73456.1	hypothetical protein YQE_09932, partial [Dendroctonus ponderosae]	118	1.4e-50	525	85.6	89.8
TRINITY_DN24569_c0_g1	ERL92532.1	hypothetical protein D910_09845 [Dendroctonus ponderosae]	689	5.6e-294	2628	78.4	80
TRINITY_DN20846_c0_g2	EJW88125.1	heat shock protein 90 [Wuchereria bancrofti]	772	6.5e-279	2499	77.3	82.8
TRINITY_DN19644_c0_g1	XP_019770906.1	PREDICTED: tectonic-1 [Dendroctonus ponderosae]	459	9.4e-234	2107	85	90.6
TRINITY_DN17219_c0_g1	ENN76472.1	hypothetical protein YQE_06926, partial [Dendroctonus ponderosae]	117	1.6e-44	470	99.1	100
TRINITY_DN17070_c0_g1	VDO94382.1	unnamed protein product [Soboliphyme baturini]	92	2.1e-39	430	84.8	92.4
TRINITY_DN27336_c0_g2	XP_019768493.1	PREDICTED: uncharacterized protein LOC109543298 isoform X1 [Dendroctonus ponderosae]	80	7.6e-28	328	82.5	90
TRINITY_DN26235_c0_g2	XP_019755447.1	PREDICTED: uncharacterized protein LOC109534285 isoform X3 [Dendroctonus ponderosae]	371	3.4e-164	1510	98.7	98.9
TRINITY_DN22038_c3_g1	XP_019759585.1	PREDICTED: BRCA2-interacting transcriptional repressor EMSY [Dendroctonus ponderosae]	568	1.4e-289	2592	93.1	95.6
TRINITY_DN22970_c0_g4	XP_019755587.1	PREDICTED: uncharacterized protein LOC109534342, partial [Dendroctonus ponderosae]	50	1.6e-10	177	68	84
TRINITY_DN19363_c1_g1	XP_019762700.1	PREDICTED: uncharacterized protein LOC109539422 [Dendroctonus ponderosae]	375	1e-122	1149	56.8	76.5
TRINITY_DN26249_c0_g1	ERL90782.1	hypothetical protein D910_08128, partial [Dendroctonus ponderosae]	114	5.4e-51	533	93	94.7
TRINITY_DN35618_c0_g1	XP_019764900.1	PREDICTED: LOW QUALITY PROTEIN: ras-specific guanine nucleotide-releasing factor 1-like [Dendroctonus ponderosae]	95	1.1e-46	488	93.7	98.9
TRINITY_DN26481_c0_g4	XP_018568586.1	uncharacterized protein LOC108908892 [Anoplophora glabripennis]	110	4.3e-15	217	48.2	67.3
TRINITY_DN26254_c0_g1	XP_011668097.1	PREDICTED: uncharacterized protein LOC105440060 [Strongylocentrotus purpuratus]	146	3.1e-14	211	35.6	48.6
TRINITY_DN9850_c0_g2	VDM41562.1	unnamed protein product [Toxocara canis]	108	8.9e-06	139	28.7	50.9
TRINITY_DN19684_c0_g4	XP_019770792.1	PREDICTED: zinc transporter ZIP1-like [Dendroctonus ponderosae] >XP_019770793.1 PREDICTED: zinc transporter ZIP1-like [Dendroctonus ponderosae] >XP_019770794.1 PREDICTED: zinc transporter ZIP1-like [Dendroctonus ponderosae] >ENN70947.1 hypothetical protein YQE_12348, partial [Dendroctonus ponderosae] >ERL88182.1 hypothetical protein D910_05570 [Dendroctonus ponderosae]	386	4.8e-176	1611	94	95.3
TRINITY_DN19666_c0_g1	AEE62609.1	unknown [Dendroctonus ponderosae] >ERL93864.1 hypothetical protein D910_11150 [Dendroctonus ponderosae]	419	6e-224	2024	95.7	97.6
TRINITY_DN23136_c0_g3	XP_019753582.1	PREDICTED: SHC-transforming protein 4 isoform X1 [Dendroctonus ponderosae]	378	5.4e-196	1785	96	97.1
TRINITY_DN25564_c0_g3	ERL91587.1	hypothetical protein D910_08917 [Dendroctonus ponderosae]	472	8.3e-256	2298	88.8	91.5
TRINITY_DN27298_c0_g1	XP_019773791.1	PREDICTED: GRB2-associated-binding protein 1 [Dendroctonus ponderosae]	611	0	3011	95.1	96.9
TRINITY_DN25457_c0_g1	XP_019758255.1	PREDICTED: putative vitellogenin receptor isoform X1 [Dendroctonus ponderosae] >XP_019758256.1 PREDICTED: putative vitellogenin receptor isoform X2 [Dendroctonus ponderosae]	1769	0	6924	94.1	96
TRINITY_DN18352_c0_g1	AEE62086.1	unknown [Dendroctonus ponderosae]	226	5.1e-102	970	100	100
TRINITY_DN25144_c0_g3	ERL92846.1	hypothetical protein D910_10153 [Dendroctonus ponderosae]	311	6e-140	1300	97.7	98.1
TRINITY_DN23796_c1_g1	XP_019769851.1	PREDICTED: glucose dehydrogenase [FAD, quinone]-like isoform X1 [Dendroctonus ponderosae]	612	0	2997	93.1	95.9
TRINITY_DN2567_c0_g1	XP_012680955.1	PREDICTED: voltage-dependent anion-selective channel protein 3 isoform X3 [Clupea harengus] >XP_012680956.1 PREDICTED: voltage-dependent anion-selective channel protein 3 isoform X4 [Clupea harengus]	79	7.7e-09	161	49.4	59.5
TRINITY_DN19365_c1_g4	KRY04547.1	Elongation factor 1-alpha, partial [Trichinella patagoniensis]	90	1.3e-41	444	91.1	97.8
TRINITY_DN25055_c0_g2	XP_019755364.1	PREDICTED: uncharacterized protein LOC109534225 [Dendroctonus ponderosae]	129	3.2e-52	537	81.4	83.7
TRINITY_DN24452_c2_g3	ERL94335.1	hypothetical protein D910_11616 [Dendroctonus ponderosae]	174	1.9e-80	787	82.8	92
TRINITY_DN27496_c0_g1	ENN74517.1	hypothetical protein YQE_08841, partial [Dendroctonus ponderosae]	260	2.9e-140	1301	92.3	95.4
TRINITY_DN25827_c0_g1	ERL90833.1	hypothetical protein D910_08178 [Dendroctonus ponderosae]	647	0	3135	96.3	98.3
TRINITY_DN12502_c0_g1	XP_019762957.1	PREDICTED: intraflagellar transport protein 20 homolog [Dendroctonus ponderosae]	129	9e-61	611	97.7	98.4
TRINITY_DN11243_c0_g1	XP_019758748.1	PREDICTED: uncharacterized protein LOC109536799 [Dendroctonus ponderosae]	91	5.6e-37	404	87.9	92.3
TRINITY_DN18907_c0_g1	ERL93369.1	hypothetical protein D910_10661 [Dendroctonus ponderosae]	230	6.9e-84	813	75.7	78.7
TRINITY_DN24128_c0_g2	EFN78794.1	hypothetical protein EAI_16705, partial [Harpegnathos saltator]	66	5.6e-09	165	51.5	68.2
TRINITY_DN24862_c0_g1	ERL86279.1	hypothetical protein D910_03688 [Dendroctonus ponderosae]	851	0	4092	95.1	96.7
TRINITY_DN17613_c0_g1	XP_019770577.1	PREDICTED: pyruvate kinase-like [Dendroctonus ponderosae] >ENN71287.1 hypothetical protein YQE_12212, partial [Dendroctonus ponderosae]	543	2.3e-293	2622	95.8	98.7
TRINITY_DN23877_c3_g1	XP_027849769.1	craniofacial development protein 2-like [Aphis gossypii]	63	1.6e-07	150	47.6	69.8
TRINITY_DN29501_c0_g1	XP_018912546.1	PREDICTED: RNA-directed DNA polymerase from mobile element jockey-like [Bemisia tabaci]	131	7.8e-24	292	47.3	66.4
TRINITY_DN21000_c3_g6	ENN73898.1	hypothetical protein YQE_09506, partial [Dendroctonus ponderosae]	70	5.2e-30	343	90	95.7
TRINITY_DN19974_c0_g1	XP_019759449.1	PREDICTED: diacylglycerol kinase eta [Dendroctonus ponderosae]	1181	0	4925	89.4	91
TRINITY_DN5786_c0_g1	XP_019762313.1	PREDICTED: uncharacterized protein LOC109539146 [Dendroctonus ponderosae]	34	8.7e-07	146	88.2	97.1
TRINITY_DN26929_c0_g1	XP_019755372.1	PREDICTED: multidrug resistance-associated protein 4-like [Dendroctonus ponderosae]	864	0	3923	92.9	95.4
TRINITY_DN25259_c0_g3	XP_019758533.1	PREDICTED: anaphase-promoting complex subunit 15-like [Dendroctonus ponderosae] >ENN77982.1 hypothetical protein YQE_05658, partial [Dendroctonus ponderosae] >ERL85966.1 hypothetical protein D910_03381 [Dendroctonus ponderosae]	99	6.1e-30	347	96	97
TRINITY_DN26714_c0_g1	ERL92990.1	hypothetical protein D910_10293 [Dendroctonus ponderosae]	280	8.3e-155	1428	97.1	98.2
TRINITY_DN23461_c0_g1	XP_015116810.1	uncharacterized protein LOC107040985 [Diachasma alloeum]	159	7.9e-25	306	42.1	54.7
TRINITY_DN35576_c0_g1	ENN78920.1	hypothetical protein YQE_04622, partial [Dendroctonus ponderosae] >ENN79070.1 hypothetical protein YQE_04473, partial [Dendroctonus ponderosae] >ENN83122.1 hypothetical protein YQE_00517, partial [Dendroctonus ponderosae] >ERL91953.1 hypothetical protein D910_09276 [Dendroctonus ponderosae]	45	7.1e-18	239	91.1	93.3
TRINITY_DN24932_c0_g3	ERL90117.1	hypothetical protein D910_07471 [Dendroctonus ponderosae]	205	1.5e-124	1167	97.6	99
TRINITY_DN19166_c0_g2	XP_019768753.1	PREDICTED: uncharacterized protein LOC109543463 [Dendroctonus ponderosae]	81	6e-31	354	84	90.1
TRINITY_DN27433_c0_g1	XP_019766477.1	PREDICTED: uncharacterized protein LOC109541922 isoform X1 [Dendroctonus ponderosae]	1014	0	4409	91.7	93.3
TRINITY_DN21648_c1_g2	XP_019764430.1	PREDICTED: protein arginine N-methyltransferase 6 [Dendroctonus ponderosae] >ENN74605.1 hypothetical protein YQE_08726, partial [Dendroctonus ponderosae] >ERL88638.1 hypothetical protein D910_06022 [Dendroctonus ponderosae]	210	3.5e-112	1059	97.6	99.5
TRINITY_DN33469_c0_g1	NP_002480.1	cytochrome c oxidase subunit NDUFA4 [Homo sapiens] >NP_001073393.1 cytochrome c oxidase subunit NDUFA4 [Pan troglodytes] >XP_003825042.1 cytochrome c oxidase subunit NDUFA4 [Pan paniscus] >O00483.1 RecName: Full=Cytochrome c oxidase subunit NDUFA4; AltName: Full=Complex I-MLRQ; Short=CI-MLRQ; AltName: Full=NADH-ubiquinone oxidoreductase MLRQ subunit >Q0MQ99.1 RecName: Full=Cytochrome c oxidase su…	56	4.6e-26	309	100	100
TRINITY_DN20506_c0_g1	ERL88943.1	hypothetical protein D910_06321 [Dendroctonus ponderosae]	496	8.2e-255	2289	90.9	93.5
TRINITY_DN20565_c2_g2	ERL91259.1	hypothetical protein D910_08593 [Dendroctonus ponderosae]	525	2.7e-252	2268	87	91.4
TRINITY_DN22744_c0_g1	XP_019762230.1	PREDICTED: guanine nucleotide-binding protein-like 3 homolog [Dendroctonus ponderosae] >ENN75874.1 hypothetical protein YQE_07603, partial [Dendroctonus ponderosae]	609	2e-237	2140	82.8	86.7
TRINITY_DN20244_c0_g4	ENN76999.1	hypothetical protein YQE_06493, partial [Dendroctonus ponderosae]	277	6.5e-59	597	57.8	65.7
TRINITY_DN25664_c0_g3	XP_019761404.1	PREDICTED: acyl-CoA synthetase family member 2, mitochondrial-like isoform X1 [Dendroctonus ponderosae]	639	0	2894	85.9	88.6
TRINITY_DN27381_c1_g6	XP_019764132.1	PREDICTED: zinc finger protein 37-like isoform X9 [Dendroctonus ponderosae]	34	5.6e-07	147	79.4	91.2
TRINITY_DN9556_c0_g1	XP_019754068.1	PREDICTED: protein UXT homolog isoform X1 [Dendroctonus ponderosae] >ENN80808.1 hypothetical protein YQE_02779, partial [Dendroctonus ponderosae] >ERL87509.1 hypothetical protein D910_04901 [Dendroctonus ponderosae]	142	3.5e-64	641	88.7	96.5
TRINITY_DN22204_c1_g2	XP_025996929.1	uncharacterized protein LOC113005494 [Solenopsis invicta]	65	1.5e-14	210	61.5	80
TRINITY_DN20224_c0_g2	XP_019772360.1	PREDICTED: kinectin-like [Dendroctonus ponderosae]	315	2.5e-93	897	77.1	79.4
TRINITY_DN25114_c1_g7	XP_018321246.1	uncharacterized protein LOC108734266 [Agrilus planipennis]	104	2.8e-28	332	59.6	78.8
TRINITY_DN16938_c1_g1	XP_019759052.1	PREDICTED: titin-like [Dendroctonus ponderosae]	160	1.1e-54	559	94.4	95
TRINITY_DN21835_c2_g1	ERL95312.1	hypothetical protein D910_12578 [Dendroctonus ponderosae]	122	2.2e-34	385	63.9	70.5
TRINITY_DN27146_c2_g1	XP_019773007.1	PREDICTED: V-type proton ATPase subunit d [Dendroctonus ponderosae] >ENN81765.1 hypothetical protein YQE_01858, partial [Dendroctonus ponderosae] >ERL89014.1 hypothetical protein D910_06392 [Dendroctonus ponderosae]	348	2.2e-202	1838	99.1	99.7
TRINITY_DN27503_c1_g1	XP_019772563.1	PREDICTED: spectrin alpha chain isoform X5 [Dendroctonus ponderosae]	2415	0	12012	99.7	99.9
TRINITY_DN27755_c5_g1	RZC40463.1	RVT 1 and/or Exo endo phos domain containing protein [Asbolus verrucosus]	829	8.3e-164	1507	38.8	58.3
TRINITY_DN23499_c4_g1	XP_019766771.1	PREDICTED: protein FAM173B isoform X3 [Dendroctonus ponderosae]	199	4e-107	1014	95.5	98
TRINITY_DN27444_c3_g1	XP_019764020.1	PREDICTED: histone-lysine N-methyltransferase ash1 isoform X1 [Dendroctonus ponderosae]	2271	0	8837	87.5	90.2
TRINITY_DN17726_c0_g1	XP_019758250.1	PREDICTED: C-type lectin domain family 18 member A-like [Dendroctonus ponderosae]	221	4.6e-96	917	78.7	88.2
TRINITY_DN19080_c0_g1	ERL92640.1	hypothetical protein D910_09953 [Dendroctonus ponderosae]	139	7.8e-58	588	85.6	92.8
TRINITY_DN21145_c0_g7	XP_019757020.1	PREDICTED: lachesin [Dendroctonus ponderosae]	361	9.8e-200	1816	97.2	98.6
TRINITY_DN20314_c0_g5	XP_019759142.1	PREDICTED: uncharacterized protein LOC109537059 isoform X1 [Dendroctonus ponderosae]	267	5.5e-85	823	68.2	76
TRINITY_DN23668_c0_g1	XP_019756511.1	PREDICTED: WD repeat-containing protein 24 [Dendroctonus ponderosae]	629	0	3232	94.9	97.3
TRINITY_DN25267_c0_g3	PCG69477.1	hypothetical protein B5V51_4051 [Heliothis virescens]	108	9.6e-25	301	51.9	72.2
TRINITY_DN22006_c1_g1	XP_019764510.1	PREDICTED: abhydrolase domain-containing protein 2 [Dendroctonus ponderosae] >AEE63040.1 unknown [Dendroctonus ponderosae] >ENN74690.1 hypothetical protein YQE_08807, partial [Dendroctonus ponderosae] >ERL92269.1 hypothetical protein D910_09586 [Dendroctonus ponderosae]	27	2.2e-06	146	100	100
TRINITY_DN3805_c0_g1	XP_019773382.1	PREDICTED: uncharacterized protein LOC109546739 [Dendroctonus ponderosae]	214	1.7e-98	938	86.4	92.1
TRINITY_DN21800_c2_g6	XP_019764316.1	PREDICTED: mitochondrial import inner membrane translocase subunit Tim8 [Dendroctonus ponderosae] >AEE62435.1 unknown [Dendroctonus ponderosae] >ERL94516.1 hypothetical protein D910_11793 [Dendroctonus ponderosae]	93	1.7e-46	488	100	100
TRINITY_DN20037_c2_g1	AAS79344.1	ribosomal protein S27a [Aedes aegypti]	81	2.6e-25	303	86.4	87.7
TRINITY_DN27485_c1_g1	XP_019768007.1	PREDICTED: LOW QUALITY PROTEIN: integral membrane protein GPR155 [Dendroctonus ponderosae]	617	0	2853	92.5	94.5
TRINITY_DN26812_c1_g1	ERL91382.1	hypothetical protein D910_08714 [Dendroctonus ponderosae]	1375	0	6162	93.2	94.4
TRINITY_DN21469_c0_g1	XP_019759621.1	PREDICTED: clavesin-1 [Dendroctonus ponderosae]	288	4.2e-159	1463	97.2	99
TRINITY_DN25330_c0_g1	AEE61379.1	unknown [Dendroctonus ponderosae] >ERL94969.1 hypothetical protein D910_12241 [Dendroctonus ponderosae]	261	3.4e-115	1085	84.7	86.2
TRINITY_DN20602_c7_g6	ERL92747.1	hypothetical protein D910_10056 [Dendroctonus ponderosae]	61	5.2e-27	317	96.7	96.7
TRINITY_DN28290_c0_g1	XP_026274534.1	protein henna isoform X2 [Frankliniella occidentalis]	90	3.7e-12	190	42.2	57.8
TRINITY_DN842_c0_g1	XP_019764896.1	PREDICTED: sodium channel protein 60E-like [Dendroctonus ponderosae] >XP_019766443.1 PREDICTED: sodium channel protein 60E-like [Dendroctonus ponderosae]	180	4e-88	849	96.7	97.8
TRINITY_DN23222_c2_g8	XP_018572511.1	uncharacterized protein LOC108911919 [Anoplophora glabripennis]	122	2.6e-12	194	36.1	50.8
TRINITY_DN17242_c0_g1	XP_019755999.1	PREDICTED: uncharacterized protein LOC109534693 [Dendroctonus ponderosae]	246	4.8e-79	771	67.5	72
TRINITY_DN2075_c0_g1	RWS07673.1	protein mago nashi-like protein [Dinothrombium tinctorium]	144	1.7e-67	670	86.1	92.4
TRINITY_DN26954_c1_g1	OXU17002.1	hypothetical protein TSAR_006387 [Trichomalopsis sarcophagae]	98	5.3e-37	406	71.4	84.7
TRINITY_DN27051_c0_g1	ERL87101.1	hypothetical protein D910_04501 [Dendroctonus ponderosae]	1559	0	6391	86.4	89.2
TRINITY_DN34772_c0_g1	BAE32071.1	unnamed protein product, partial [Mus musculus]	136	8.7e-72	706	100	100
TRINITY_DN21551_c0_g3	ENN80418.1	hypothetical protein YQE_03166, partial [Dendroctonus ponderosae]	220	9.7e-120	1124	95.5	97.7
TRINITY_DN16871_c0_g3	NP_001395.1	elongation factor 1-gamma [Homo sapiens] >XP_024110847.1 elongation factor 1-gamma [Pongo abelii] >P26641.3 RecName: Full=Elongation factor 1-gamma; Short=EF-1-gamma; AltName: Full=eEF-1B gamma >CAA45089.1 homologue to elongation factor 1-gamma from A.salina [Homo sapiens] >CAA77630.1 elongation factor-1-gamma [Homo sapiens] >AAH00384.1 Eukaryotic translation elongation factor 1 gamma [Homo sapie…	426	1.3e-232	2097	100	100
TRINITY_DN20835_c1_g2	XP_014365539.1	PREDICTED: RNA-directed DNA polymerase from mobile element jockey-like [Papilio machaon]	89	5.8e-11	183	47.2	64
TRINITY_DN28256_c0_g1	XP_011558564.1	PREDICTED: probable phosphoribosylformylglycinamidine synthase [Plutella xylostella]	81	2.2e-37	407	95.1	95.1
TRINITY_DN24520_c0_g2	XP_019763997.1	PREDICTED: transcription initiation factor TFIID subunit 13 [Dendroctonus ponderosae] >ENN74913.1 hypothetical protein YQE_08491, partial [Dendroctonus ponderosae] >ERL87166.1 hypothetical protein D910_04566 [Dendroctonus ponderosae]	128	1.1e-63	637	99.2	100
TRINITY_DN22547_c1_g6	GAA55914.1	hypothetical protein CLF_109359 [Clonorchis sinensis]	66	1.5e-09	167	53	66.7
TRINITY_DN12141_c0_g1	KFO87312.1	COP9 signalosome complex subunit 7a, partial [Buceros rhinoceros silvestris]	159	8.1e-12	190	31.4	58.5
TRINITY_DN26017_c0_g1	ERL83407.1	hypothetical protein D910_00366 [Dendroctonus ponderosae] >ERL83408.1 hypothetical protein D910_00367 [Dendroctonus ponderosae]	456	1.6e-232	2103	89.5	95
TRINITY_DN21802_c1_g6	KRX12343.1	Chlorophyll a-b binding protein 40, chloroplastic [Trichinella nelsoni] >KRY99282.1 Chlorophyll a-b binding protein 40, chloroplastic [Trichinella zimbabwensis]	217	9.4e-115	1078	89.4	94.9
TRINITY_DN22856_c0_g9	XP_022912095.1	uncharacterized protein LOC111423076, partial [Onthophagus taurus]	264	3e-67	669	50	69.3
TRINITY_DN16720_c0_g1	EGV91139.1	hypothetical protein I79_026279 [Cricetulus griseus]	38	1.6e-06	144	97.4	97.4
TRINITY_DN27389_c0_g1	XP_018563303.1	dual oxidase [Anoplophora glabripennis]	1311	0	5866	83	90.3
TRINITY_DN6945_c0_g2	ENN79007.1	hypothetical protein YQE_04535, partial [Dendroctonus ponderosae]	172	1.5e-91	877	99.4	99.4
TRINITY_DN34649_c0_g1	XP_022206045.1	uncharacterized protein LOC111062660 [Nilaparvata lugens]	76	1.8e-08	158	50	60.5
TRINITY_DN26841_c0_g1	ENN75443.1	hypothetical protein YQE_07994, partial [Dendroctonus ponderosae] >ERL86366.1 hypothetical protein D910_03774 [Dendroctonus ponderosae]	140	4.3e-14	214	41.4	50.7
TRINITY_DN23470_c1_g1	GBP01766.1	HTH-type transcriptional regulator HdfR [Eumeta japonica]	33	6.3e-07	147	75.8	84.8
TRINITY_DN19091_c0_g1	XP_019757411.1	PREDICTED: uncharacterized protein LOC109535836 [Dendroctonus ponderosae] >ENN78613.1 hypothetical protein YQE_04917, partial [Dendroctonus ponderosae] >ERL85257.1 hypothetical protein D910_02678 [Dendroctonus ponderosae]	211	1.5e-101	964	91	94.3
TRINITY_DN21322_c0_g2	ERL92853.1	hypothetical protein D910_10160 [Dendroctonus ponderosae]	180	4e-80	779	88.3	88.3
TRINITY_DN14516_c0_g1	XP_019756454.1	PREDICTED: malate dehydrogenase, mitochondrial-like [Dendroctonus ponderosae]	350	2.1e-181	1655	93.7	97.1
TRINITY_DN9948_c0_g1	ENN77887.1	hypothetical protein YQE_05565, partial [Dendroctonus ponderosae]	161	6e-58	587	76.4	83.9
TRINITY_DN6778_c0_g1	XP_023295106.1	uncharacterized protein LOC111678101 [Lucilia cuprina]	125	1.3e-39	428	68	80
TRINITY_DN24273_c0_g1	XP_015838276.1	PREDICTED: uncharacterized protein LOC658297 isoform X1 [Tribolium castaneum] >XP_015838280.1 PREDICTED: uncharacterized protein LOC658297 isoform X1 [Tribolium castaneum]	363	2.5e-124	1165	64.7	79.9
TRINITY_DN23446_c1_g1	XP_019759977.1	PREDICTED: uncharacterized protein LOC109537611 isoform X1 [Dendroctonus ponderosae]	404	2.1e-211	1915	95.5	97.5
TRINITY_DN27283_c0_g2	ERL91141.1	hypothetical protein D910_08481, partial [Dendroctonus ponderosae]	750	0	4070	97.7	99.2
TRINITY_DN22175_c1_g4	XP_018357345.1	PREDICTED: uncharacterized protein LOC108757430 [Trachymyrmex cornetzi]	253	3.6e-10	178	24.1	43.1
TRINITY_DN22959_c0_g1	XP_019768970.1	PREDICTED: coatomer subunit beta' [Dendroctonus ponderosae] >ENN71955.1 hypothetical protein YQE_11389, partial [Dendroctonus ponderosae]	906	0	3777	98.1	98.7
TRINITY_DN23950_c0_g3	ERL89206.1	hypothetical protein D910_06580 [Dendroctonus ponderosae]	410	7.4e-152	1402	71.5	75.1
TRINITY_DN27608_c4_g2	XP_019766947.1	PREDICTED: mitochondrial thiamine pyrophosphate carrier [Dendroctonus ponderosae] >ENN73182.1 hypothetical protein YQE_10236, partial [Dendroctonus ponderosae] >ERL92378.1 hypothetical protein D910_09692 [Dendroctonus ponderosae]	333	5e-175	1601	91.6	92.2
TRINITY_DN25938_c0_g2	XP_019754524.1	PREDICTED: octopamine receptor Oamb [Dendroctonus ponderosae] >XP_019754525.1 PREDICTED: octopamine receptor Oamb [Dendroctonus ponderosae]	555	5.9e-275	2467	98.7	99.1
TRINITY_DN1852_c0_g1	XP_019756536.1	PREDICTED: sex peptide receptor-like [Dendroctonus ponderosae]	72	3.9e-34	380	100	100
TRINITY_DN22242_c0_g1	ERL88208.1	hypothetical protein D910_05596 [Dendroctonus ponderosae]	563	1.2e-306	2737	93.8	96.8
TRINITY_DN5969_c0_g1	ENN83264.1	hypothetical protein YQE_00377, partial [Dendroctonus ponderosae] >ENN83404.1 hypothetical protein YQE_00237, partial [Dendroctonus ponderosae]	120	1.6e-47	496	95	95.8
TRINITY_DN25258_c0_g1	XP_019755459.1	PREDICTED: gelsolin [Dendroctonus ponderosae] >ENN79901.1 hypothetical protein YQE_03720, partial [Dendroctonus ponderosae]	49	4.1e-06	141	63.3	67.3
TRINITY_DN25764_c0_g1	XP_019763708.1	PREDICTED: sodium/nucleoside cotransporter 2-like [Dendroctonus ponderosae] >XP_019763709.1 PREDICTED: sodium/nucleoside cotransporter 2-like [Dendroctonus ponderosae] >ENN75013.1 hypothetical protein YQE_08329, partial [Dendroctonus ponderosae]	571	2e-298	2667	92.8	96.1
TRINITY_DN20861_c0_g1	ENN70898.1	hypothetical protein YQE_12303, partial [Dendroctonus ponderosae]	911	0	4597	96.9	98.1
TRINITY_DN21188_c1_g2	XP_019760668.1	PREDICTED: zinc finger protein 62-like [Dendroctonus ponderosae] >ENN76710.1 hypothetical protein YQE_06775, partial [Dendroctonus ponderosae]	41	7.1e-12	189	85.4	92.7
TRINITY_DN27508_c2_g1	XP_019767472.1	PREDICTED: protein 4.1 homolog isoform X2 [Dendroctonus ponderosae]	2623	0	9628	95.9	97.1
TRINITY_DN21498_c2_g1	ERL91999.1	hypothetical protein D910_09321, partial [Dendroctonus ponderosae]	218	1.2e-96	922	96.3	98.6
TRINITY_DN27416_c1_g2	XP_019761687.1	PREDICTED: cationic amino acid transporter 2-like [Dendroctonus ponderosae]	615	0	2988	96.9	98.4
TRINITY_DN17617_c0_g1	XP_019769683.1	PREDICTED: probable prefoldin subunit 4 [Dendroctonus ponderosae] >ENN71604.1 hypothetical protein YQE_11703, partial [Dendroctonus ponderosae]	135	9.5e-63	629	91.9	94.1
TRINITY_DN21715_c0_g1	XP_019769513.1	PREDICTED: uncharacterized protein LOC109543989 [Dendroctonus ponderosae]	414	1e-217	1969	90.1	95.7
TRINITY_DN5389_c0_g1	XP_006834008.1	PREDICTED: lysine-specific demethylase 4D-like [Chrysochloris asiatica]	272	2.3e-06	146	26.1	37.9
TRINITY_DN14686_c0_g1	ENN81322.1	hypothetical protein YQE_02289, partial [Dendroctonus ponderosae] >ERL96149.1 hypothetical protein D910_01176 [Dendroctonus ponderosae] >ERL96151.1 hypothetical protein D910_01178 [Dendroctonus ponderosae]	272	7.8e-131	1219	86	92.3
TRINITY_DN26676_c0_g1	XP_019761547.1	PREDICTED: polycomb protein Asx isoform X1 [Dendroctonus ponderosae]	1362	0	5756	92.9	94.1
TRINITY_DN21336_c3_g3	ENN75912.1	hypothetical protein YQE_07554, partial [Dendroctonus ponderosae]	306	1.6e-180	1650	97.4	99.3
TRINITY_DN21559_c1_g2	XP_019768556.1	PREDICTED: uncharacterized protein LOC109543327 [Dendroctonus ponderosae]	122	2.2e-52	544	85.2	90.2
TRINITY_DN14159_c0_g1	XP_022912912.1	40S ribosomal protein S29 [Onthophagus taurus] >Q4LAY1.1 RecName: Full=40S ribosomal protein S29 >CAJ01886.1 ribosomal protein S29e [Scarabaeus laticollis]	45	3.4e-13	198	71.1	84.4
TRINITY_DN7827_c0_g1	XP_018006282.1	PREDICTED: co-chaperone protein HscB homolog [Hyalella azteca] >TDM06673.1 Fe-S protein assembly co-chaperone HscB [Ideonella sp. MAG2]	106	9.1e-31	351	65.1	79.2
TRINITY_DN21280_c0_g5	KMQ86519.1	endonuclease-reverse transcriptase [Lasius niger]	85	2.4e-16	226	49.4	71.8
TRINITY_DN24256_c0_g1	XP_019762006.1	PREDICTED: uncharacterized protein LOC109538972 [Dendroctonus ponderosae]	504	1e-228	2066	86.1	91.1
TRINITY_DN21248_c0_g2	XP_019869259.1	PREDICTED: sphingolipid delta(4)-desaturase DES1-like [Aethina tumida] >XP_019877924.1 PREDICTED: sphingolipid delta(4)-desaturase DES1-like [Aethina tumida]	34	2.9e-10	175	91.2	97.1
TRINITY_DN25143_c1_g1	XP_019773470.1	PREDICTED: protein pygopus-like isoform X3 [Dendroctonus ponderosae]	400	7.7e-110	1042	98.3	98.3
TRINITY_DN30081_c0_g1	XP_019760947.1	PREDICTED: uncharacterized protein LOC109538212, partial [Dendroctonus ponderosae]	75	9.9e-24	289	76	89.3
TRINITY_DN23159_c0_g1	XP_019755996.1	PREDICTED: mitogen-activated protein kinase kinase kinase 10-like [Dendroctonus ponderosae] >XP_019755997.1 PREDICTED: mitogen-activated protein kinase kinase kinase 10-like [Dendroctonus ponderosae]	444	2.6e-211	1916	91.4	93
TRINITY_DN19813_c0_g1	VDO43315.1	unnamed protein product [Brugia timori]	477	2.9e-11	188	24.3	35.6
TRINITY_DN14004_c0_g1	ENN74669.1	hypothetical protein YQE_08786, partial [Dendroctonus ponderosae]	28	5.4e-06	137	100	100
TRINITY_DN25693_c0_g3	ERL90583.1	hypothetical protein D910_07930 [Dendroctonus ponderosae]	142	3.8e-10	175	28.2	46.5
TRINITY_DN21449_c0_g1	ENN81398.1	hypothetical protein YQE_02214, partial [Dendroctonus ponderosae]	148	2.5e-70	699	94.6	98
TRINITY_DN24868_c0_g2	KMQ86631.1	rna-directed dna polymerase from mobile element jockey-like protein [Lasius niger]	55	1.7e-06	142	45.5	63.6
TRINITY_DN16992_c0_g1	ENN70840.1	hypothetical protein YQE_12504, partial [Dendroctonus ponderosae] >ERL90418.1 hypothetical protein D910_07767 [Dendroctonus ponderosae]	31	4.8e-08	154	96.8	100
TRINITY_DN25738_c0_g7	ELK33791.1	60S ribosomal protein L10a [Myotis davidii]	173	6.5e-90	863	98.8	99.4
TRINITY_DN33442_c0_g1	XP_020804394.1	uncharacterized protein LOC110181063 [Drosophila serrata]	73	3e-08	156	42.5	61.6
TRINITY_DN16343_c0_g2	XP_003968893.1	PREDICTED: 60S ribosomal protein L30 [Takifugu rubripes] >XP_010728760.1 60S ribosomal protein L30 [Larimichthys crocea] >XP_019957533.1 PREDICTED: 60S ribosomal protein L30 [Paralichthys olivaceus] >XP_022066774.1 60S ribosomal protein L30 [Acanthochromis polyacanthus] >XP_023146761.1 60S ribosomal protein L30 [Amphiprion ocellaris] >XP_029023294.1 60S ribosomal protein L30 [Betta splendens] >AA…	116	1.7e-58	591	100	100
TRINITY_DN22329_c0_g8	ERL90345.1	hypothetical protein D910_07694 [Dendroctonus ponderosae]	126	7.4e-14	211	77.8	82.5
TRINITY_DN20652_c0_g1	AFK26045.1	cytochrome oxidase subunit I (mitochondrion) [Dendroctonus rhizophagus] >AFK26046.1 cytochrome oxidase subunit I (mitochondrion) [Dendroctonus rhizophagus] >AFK26056.1 cytochrome oxidase subunit I (mitochondrion) [Dendroctonus rhizophagus] >AFK26067.1 cytochrome oxidase subunit I (mitochondrion) [Dendroctonus rhizophagus] >AFK26068.1 cytochrome oxidase subunit I (mitochondrion) [Dendroctonus rhiz…	125	5.3e-54	552	87.2	93.6
TRINITY_DN20184_c0_g1	XP_019771896.1	PREDICTED: facilitated trehalose transporter Tret1-like [Dendroctonus ponderosae]	451	9e-236	2125	94	97.6
TRINITY_DN21185_c1_g1	XP_019754260.1	PREDICTED: uncharacterized protein LOC109533396 [Dendroctonus ponderosae]	406	3.8e-208	1886	95.6	97.8
TRINITY_DN23557_c0_g9	VDD97764.1	unnamed protein product [Enterobius vermicularis]	49	2.6e-06	143	55.1	69.4
TRINITY_DN25311_c1_g2	ERL95309.1	hypothetical protein D910_12575 [Dendroctonus ponderosae]	124	3.9e-50	525	84.7	90.3
TRINITY_DN26124_c0_g2	ERL89211.1	hypothetical protein D910_06585 [Dendroctonus ponderosae]	69	1.3e-30	353	95.7	95.7
TRINITY_DN20224_c0_g3	XP_019764885.1	PREDICTED: probable RNA-binding protein EIF1AD [Dendroctonus ponderosae] >ERL96260.1 hypothetical protein D910_01671 [Dendroctonus ponderosae]	141	4.5e-59	599	80.9	87.2
TRINITY_DN24901_c0_g3	XP_019769620.1	PREDICTED: uncharacterized protein LOC109544048 [Dendroctonus ponderosae]	124	5.8e-61	612	93.5	97.6
TRINITY_DN9319_c0_g1	ERL83723.1	hypothetical protein D910_00936 [Dendroctonus ponderosae]	140	3e-66	658	92.1	94.3
TRINITY_DN26555_c1_g1	ENN78687.1	hypothetical protein YQE_04859, partial [Dendroctonus ponderosae]	673	1.1e-230	2084	73.3	79
TRINITY_DN24049_c0_g4	XP_019758613.1	PREDICTED: 6-phosphofructo-2-kinase/fructose-2,6-bisphosphatase-like [Dendroctonus ponderosae]	516	1.5e-300	2687	97.9	99.8
TRINITY_DN12845_c0_g2	XP_019765601.1	PREDICTED: lachesin-like isoform X1 [Dendroctonus ponderosae]	184	8.4e-88	845	90.8	94
TRINITY_DN25980_c1_g1	XP_019757383.1	PREDICTED: LOW QUALITY PROTEIN: probable phosphorylase b kinase regulatory subunit alpha [Dendroctonus ponderosae]	1056	0	4823	90	91.5
TRINITY_DN15922_c0_g1	XP_028279245.1	ubiquitin-conjugating enzyme E2 D4-like [Parambassis ranga]	66	1.9e-26	312	80.3	89.4
TRINITY_DN21151_c0_g2	ENN70927.1	hypothetical protein YQE_12329, partial [Dendroctonus ponderosae] >ERL88199.1 hypothetical protein D910_05588 [Dendroctonus ponderosae]	323	3.8e-186	1699	96.3	99.4
TRINITY_DN19675_c1_g8	XP_022160096.1	uncharacterized protein LOC111026349 [Myzus persicae]	110	2.4e-30	348	55.5	73.6
TRINITY_DN21721_c1_g2	XP_019759438.1	PREDICTED: dopamine D2-like receptor [Dendroctonus ponderosae]	112	9.1e-44	467	91.1	91.1
TRINITY_DN25512_c0_g3	ERL95113.1	hypothetical protein D910_12383 [Dendroctonus ponderosae]	90	7.9e-28	329	66.7	82.2
TRINITY_DN23877_c3_g3	XP_019767004.1	PREDICTED: methyltransferase-like protein 23 isoform X3 [Dendroctonus ponderosae]	197	5.7e-106	1007	93.4	99
TRINITY_DN23825_c0_g6	XP_019766164.1	PREDICTED: voltage-gated potassium channel subunit beta-2 isoform X4 [Dendroctonus ponderosae]	450	1.5e-250	2256	99.3	99.6
TRINITY_DN20864_c0_g2	XP_008181747.1	PREDICTED: putative nuclease HARBI1 [Acyrthosiphon pisum]	111	6.4e-30	344	64	78.4
TRINITY_DN25594_c0_g1	XP_019757382.1	PREDICTED: protein croquemort-like isoform X2 [Dendroctonus ponderosae]	475	9.3e-266	2386	91.8	96
TRINITY_DN26230_c1_g5	ENN71174.1	hypothetical protein YQE_12104, partial [Dendroctonus ponderosae] >ERL89214.1 hypothetical protein D910_06588 [Dendroctonus ponderosae]	42	1.7e-08	161	83.3	88.1
TRINITY_DN9508_c0_g1	CAL69068.1	TPA: putative 60S ribosomal protein L22 isoform 1 [Spadella cephaloptera]	126	1e-29	343	56.3	72.2
TRINITY_DN24515_c0_g1	ENN76698.1	hypothetical protein YQE_06763, partial [Dendroctonus ponderosae]	132	9.5e-14	209	41.7	51.5
TRINITY_DN21186_c0_g8	XP_019763626.1	PREDICTED: uncharacterized protein LOC109539977 [Dendroctonus ponderosae] >ENN75122.1 hypothetical protein YQE_08302, partial [Dendroctonus ponderosae] >ERL84836.1 hypothetical protein D910_02260 [Dendroctonus ponderosae]	217	6.5e-129	1203	99.1	100
TRINITY_DN20212_c1_g1	VDD97764.1	unnamed protein product [Enterobius vermicularis]	45	3.3e-09	165	68.9	75.6
TRINITY_DN19542_c0_g7	NP_002037.2	glyceraldehyde-3-phosphate dehydrogenase isoform 1 [Homo sapiens] >NP_001276674.1 glyceraldehyde-3-phosphate dehydrogenase isoform 1 [Homo sapiens] >NP_001276675.1 glyceraldehyde-3-phosphate dehydrogenase isoform 1 [Homo sapiens] >XP_508955.1 glyceraldehyde-3-phosphate dehydrogenase isoform X1 [Pan troglodytes] >XP_003819180.1 glyceraldehyde-3-phosphate dehydrogenase [Pan paniscus] >XP_004052609.…	335	2.1e-192	1750	100	100
TRINITY_DN23167_c1_g1	XP_019764346.1	PREDICTED: protein stoned-B-like [Dendroctonus ponderosae]	603	0	2907	94.2	95.2
TRINITY_DN22930_c0_g1	XP_019763532.1	PREDICTED: zinc finger CCCH domain-containing protein 15 homolog isoform X1 [Dendroctonus ponderosae] >AEE61623.1 unknown [Dendroctonus ponderosae] >ENN75158.1 hypothetical protein YQE_08271, partial [Dendroctonus ponderosae] >ERL84977.1 hypothetical protein D910_02400 [Dendroctonus ponderosae]	395	4.3e-196	1785	95.9	96.7
TRINITY_DN21219_c0_g1	ERL92160.1	hypothetical protein D910_09480 [Dendroctonus ponderosae]	102	3.8e-42	455	86.3	90.2
TRINITY_DN17705_c0_g1	XP_019764825.1	PREDICTED: protein cornichon isoform X1 [Dendroctonus ponderosae] >AEE61759.1 unknown [Dendroctonus ponderosae] >ENN74410.1 hypothetical protein YQE_08995, partial [Dendroctonus ponderosae] >ERL85793.1 hypothetical protein D910_03208 [Dendroctonus ponderosae]	99	2.7e-48	507	97	100
TRINITY_DN32010_c0_g1	GBP74145.1	hypothetical protein EVAR_58718_1 [Eumeta japonica]	69	6.8e-13	196	49.3	68.1
TRINITY_DN21747_c1_g5	XP_022911381.1	uncharacterized protein LOC111422410 [Onthophagus taurus]	72	1.5e-08	164	55.6	70.8
TRINITY_DN26548_c0_g1	XP_019771455.1	PREDICTED: uncharacterized protein LOC109545297 [Dendroctonus ponderosae]	1011	0	4183	84.1	87.1
TRINITY_DN23257_c0_g4	XP_019759733.1	PREDICTED: mitotic spindle assembly checkpoint protein MAD2A [Dendroctonus ponderosae] >AEE63307.1 unknown [Dendroctonus ponderosae] >ENN77311.1 hypothetical protein YQE_06137, partial [Dendroctonus ponderosae] >ERL91543.1 hypothetical protein D910_08873 [Dendroctonus ponderosae]	204	2.5e-103	984	93.1	98
TRINITY_DN29318_c0_g1	ENN76874.1	hypothetical protein YQE_06715, partial [Dendroctonus ponderosae]	48	2.4e-16	228	97.9	97.9
TRINITY_DN27092_c0_g1	ERL88003.1	hypothetical protein D910_05392 [Dendroctonus ponderosae]	750	0	3003	82.4	87.7
TRINITY_DN27112_c0_g1	ENN71465.1	hypothetical protein YQE_11882, partial [Dendroctonus ponderosae]	172	9.9e-83	805	90.7	94.2
TRINITY_DN20280_c0_g1	ERL91062.1	hypothetical protein D910_08404 [Dendroctonus ponderosae]	43	7.9e-11	183	83.7	90.7
TRINITY_DN25840_c1_g1	XP_970226.1	PREDICTED: mannosyl-oligosaccharide 1,2-alpha-mannosidase IA isoform X1 [Tribolium castaneum] >KYB24855.1 Mannosyl-oligosaccharide alpha-1,2-mannosidase isoform A-like Protein [Tribolium castaneum]	632	1.4e-251	2264	68.4	82.1
TRINITY_DN20909_c4_g1	ERL91874.1	hypothetical protein D910_09198 [Dendroctonus ponderosae]	198	1.1e-74	733	79.3	82.3
TRINITY_DN22353_c3_g5	XP_019770573.1	PREDICTED: ATP-sensitive inward rectifier potassium channel 1-like isoform X2 [Dendroctonus ponderosae]	176	1.3e-96	922	94.9	97.7
TRINITY_DN23640_c0_g11	ERL94441.1	hypothetical protein D910_11718, partial [Dendroctonus ponderosae]	174	9.5e-70	689	75.9	79.9
TRINITY_DN21619_c2_g6	XP_019760115.1	PREDICTED: U6 snRNA-associated Sm-like protein LSm5 isoform X3 [Dendroctonus ponderosae]	69	4e-29	340	94.2	100
TRINITY_DN26833_c3_g4	XP_019765152.1	PREDICTED: dual specificity mitogen-activated protein kinase kinase dSOR1 isoform X1 [Dendroctonus ponderosae]	355	1.4e-203	1849	99.7	99.7
TRINITY_DN23118_c1_g4	ERL86008.1	hypothetical protein D910_03422 [Dendroctonus ponderosae]	30	4.3e-07	146	90	96.7
TRINITY_DN26176_c0_g3	XP_019760659.1	PREDICTED: heat shock protein 70 A1-like [Dendroctonus ponderosae] >ENN76738.1 hypothetical protein YQE_06803, partial [Dendroctonus ponderosae] >ERL90377.1 hypothetical protein D910_07726 [Dendroctonus ponderosae]	47	3.5e-20	259	100	100
TRINITY_DN9984_c0_g1	YP_636060.1	cytochrome c oxidase subunit II (mitochondrion) [Micropterus salmoides] >YP_004021539.1 COX2 gene product (mitochondrion) [Micropterus floridanus] >ABF74816.1 cytochrome c oxidase subunit II (mitochondrion) [Micropterus salmoides] >ADP01854.1 cytochrome c oxidase subunit II (mitochondrion) [Micropterus floridanus] >BAP40469.1 cytochrome c oxidase subunit II (mitochondrion) [Micropterus salmoides]…	110	3e-53	545	96.4	97.3
TRINITY_DN24729_c1_g1	XP_019758344.1	PREDICTED: uncharacterized protein C1orf131 homolog [Dendroctonus ponderosae] >ENN78039.1 hypothetical protein YQE_05476, partial [Dendroctonus ponderosae] >ERL87267.1 hypothetical protein D910_04663 [Dendroctonus ponderosae]	128	1.1e-48	511	82	89.8
TRINITY_DN23690_c0_g3	XP_028137105.1	uncharacterized protein LOC114331686 [Diabrotica virgifera virgifera]	75	7.4e-17	230	49.3	85.3
TRINITY_DN21337_c0_g2	XP_019759435.1	PREDICTED: uncharacterized protein LOC109537251 [Dendroctonus ponderosae]	50	3.1e-12	194	76	86
TRINITY_DN26222_c0_g1	XP_019760018.1	PREDICTED: uncharacterized protein LOC109537651 [Dendroctonus ponderosae]	202	5e-102	968	93.6	96.5
TRINITY_DN18924_c0_g1	AEE62202.1	unknown [Dendroctonus ponderosae]	230	2.2e-127	1188	99.1	100
TRINITY_DN4275_c0_g1	RCN50035.1	BolA domain protein [Ancylostoma caninum]	93	2.9e-07	150	40.9	54.8
TRINITY_DN26474_c0_g3	XP_019762831.1	PREDICTED: glucose-fructose oxidoreductase domain-containing protein 2 [Dendroctonus ponderosae] >ENN75577.1 hypothetical protein YQE_07920, partial [Dendroctonus ponderosae] >ERL87472.1 hypothetical protein D910_04864 [Dendroctonus ponderosae]	388	3e-220	1991	99	99.7
TRINITY_DN23111_c0_g2	XP_019759349.1	PREDICTED: G protein alpha i subunit [Dendroctonus ponderosae]	455	2.7e-188	1718	78	78
TRINITY_DN25419_c1_g1	XP_015836571.1	PREDICTED: uncharacterized protein LOC103313445 [Tribolium castaneum]	95	2.5e-21	274	53.7	71.6
TRINITY_DN16842_c0_g2	XP_013189632.1	PREDICTED: uncharacterized protein LOC106134190 [Amyelois transitella] >XP_013199867.1 PREDICTED: uncharacterized protein LOC106142597 [Amyelois transitella] >XP_013183722.1 PREDICTED: uncharacterized protein LOC106129658 [Amyelois transitella] >XP_013187247.1 PREDICTED: uncharacterized protein LOC106132396 [Amyelois transitella] >XP_013191404.1 PREDICTED: uncharacterized protein LOC106135599 [Am…	75	4.5e-12	194	52	68
TRINITY_DN23848_c0_g1	ERL90554.1	hypothetical protein D910_07902 [Dendroctonus ponderosae]	458	4.5e-273	2449	97.4	98.7
TRINITY_DN23827_c3_g1	ENN80503.1	hypothetical protein YQE_03075, partial [Dendroctonus ponderosae] >ERL85986.1 hypothetical protein D910_03400 [Dendroctonus ponderosae]	51	4.1e-13	200	76.5	80.4
TRINITY_DN23636_c0_g1	XP_019766919.1	PREDICTED: protein cueball [Dendroctonus ponderosae]	595	2.8e-296	2649	96.3	98.5
TRINITY_DN5069_c0_g1	ENN78198.1	hypothetical protein YQE_05350, partial [Dendroctonus ponderosae]	134	8.4e-67	663	94	97
TRINITY_DN21955_c0_g1	XP_019773242.1	PREDICTED: serine--pyruvate aminotransferase, mitochondrial isoform X2 [Dendroctonus ponderosae] >ENN81587.1 hypothetical protein YQE_01997, partial [Dendroctonus ponderosae]	462	4.1e-154	1421	67.3	71.6
TRINITY_DN23040_c0_g2	ENN73320.1	hypothetical protein YQE_10083, partial [Dendroctonus ponderosae]	486	6.2e-238	2144	91.4	94.4
TRINITY_DN22513_c1_g1	XP_019759308.1	PREDICTED: E3 ubiquitin-protein ligase CHFR-like [Dendroctonus ponderosae] >ENN77602.1 hypothetical protein YQE_05897, partial [Dendroctonus ponderosae]	362	3.1e-59	602	42.3	57.7
TRINITY_DN15535_c0_g4	XP_005435183.1	receptor of activated protein C kinase 1 [Falco cherrug]	136	1.4e-71	704	90.4	97.1
TRINITY_DN23966_c0_g1	EFN71217.1	hypothetical protein EAG_05969, partial [Camponotus floridanus]	127	1.5e-07	152	31.5	46.5
TRINITY_DN20677_c0_g1	XP_018371515.1	PREDICTED: uncharacterized protein LOC108766612 [Trachymyrmex cornetzi]	149	3.8e-29	340	45	62.4
TRINITY_DN21966_c0_g4	XP_019754295.1	PREDICTED: protein I'm not dead yet isoform X2 [Dendroctonus ponderosae]	548	4.1e-283	2534	91.4	95.3
TRINITY_DN26969_c0_g3	XP_019766303.1	PREDICTED: aryl-hydrocarbon-interacting protein-like 1 [Dendroctonus ponderosae] >XP_019766304.1 PREDICTED: aryl-hydrocarbon-interacting protein-like 1 [Dendroctonus ponderosae] >AEE61690.1 unknown [Dendroctonus ponderosae] >ENN73508.1 hypothetical protein YQE_09759, partial [Dendroctonus ponderosae] >ERL89427.1 hypothetical protein D910_06794 [Dendroctonus ponderosae]	254	1.5e-122	1147	89	90.9
TRINITY_DN25987_c0_g1	XP_019771272.1	PREDICTED: uncharacterized protein LOC109545173 isoform X2 [Dendroctonus ponderosae]	845	0	3574	95.3	97.4
TRINITY_DN4842_c0_g1	XP_019754666.1	PREDICTED: retinal homeobox protein Rx-like [Dendroctonus ponderosae]	125	1.4e-63	635	100	100
TRINITY_DN23698_c0_g4	XP_019755148.1	PREDICTED: TRAF3-interacting protein 1 [Dendroctonus ponderosae]	68	4.4e-24	293	85.3	95.6
TRINITY_DN19929_c1_g3	XP_019754933.1	PREDICTED: fatty acyl-CoA hydrolase precursor, medium chain [Dendroctonus ponderosae] >ENN80248.1 hypothetical protein YQE_03243, partial [Dendroctonus ponderosae]	342	4.3e-191	1738	93.9	97.1
TRINITY_DN26658_c1_g1	XP_019872845.1	PREDICTED: troponin I isoform X5 [Aethina tumida]	108	1.6e-42	459	86.1	94.4
TRINITY_DN26518_c1_g9	XP_019767396.1	PREDICTED: uncharacterized protein LOC109542565 [Dendroctonus ponderosae]	102	1.1e-38	421	75.5	86.3
TRINITY_DN19749_c0_g2	XP_019765277.1	PREDICTED: probable E3 ubiquitin-protein ligase makorin-1 isoform X2 [Dendroctonus ponderosae] >XP_019765278.1 PREDICTED: probable E3 ubiquitin-protein ligase makorin-1 isoform X2 [Dendroctonus ponderosae] >ENN74124.1 hypothetical protein YQE_09097, partial [Dendroctonus ponderosae] >ERL94255.1 hypothetical protein D910_11536 [Dendroctonus ponderosae]	466	1e-272	2447	94.8	97
TRINITY_DN22879_c0_g1	XP_019759914.1	PREDICTED: sodium-coupled monocarboxylate transporter 1-like [Dendroctonus ponderosae]	181	1e-73	729	97.8	100
TRINITY_DN26436_c0_g2	XP_019772564.1	PREDICTED: protein slit [Dendroctonus ponderosae]	1481	0	4885	97.7	98.4
TRINITY_DN24051_c1_g1	XP_019760896.1	PREDICTED: mitogen-activated protein kinase kinase kinase 7-like [Dendroctonus ponderosae] >ENN76602.1 hypothetical protein YQE_06860, partial [Dendroctonus ponderosae] >ERL88390.1 hypothetical protein D910_05776 [Dendroctonus ponderosae]	502	5e-287	2568	97.4	98.6
TRINITY_DN25915_c0_g1	XP_019761445.1	PREDICTED: transmembrane protein 11-A, mitochondrial [Dendroctonus ponderosae] >AEE63315.1 unknown [Dendroctonus ponderosae] >ENN76298.1 hypothetical protein YQE_07261, partial [Dendroctonus ponderosae] >ERL86944.1 hypothetical protein D910_04347 [Dendroctonus ponderosae]	132	3.3e-65	653	93.2	93.9
TRINITY_DN26813_c2_g3	XP_019772820.1	PREDICTED: 8-oxo-dGDP phosphatase NUDT18 [Dendroctonus ponderosae]	337	7.8e-192	1748	98.2	99.4
TRINITY_DN25442_c1_g1	XP_019772379.1	PREDICTED: apoptosis-stimulating of p53 protein 2-like [Dendroctonus ponderosae]	930	0	3138	91.1	91.8
TRINITY_DN17208_c0_g2	ERL91628.1	hypothetical protein D910_08958 [Dendroctonus ponderosae]	172	4.6e-55	563	69.8	76.7
TRINITY_DN15056_c0_g1	XP_019756701.1	PREDICTED: uncharacterized protein LOC109535256 [Dendroctonus ponderosae] >ENN79216.1 hypothetical protein YQE_04400, partial [Dendroctonus ponderosae] >ERL86307.1 hypothetical protein D910_03715 [Dendroctonus ponderosae]	289	1.5e-130	1216	97.9	99
TRINITY_DN26040_c0_g1	XP_019771967.1	PREDICTED: enhancer of polycomb homolog 1 [Dendroctonus ponderosae]	832	0	3696	88.3	92.5
TRINITY_DN23189_c0_g1	ERL87060.1	hypothetical protein D910_04461 [Dendroctonus ponderosae]	164	5.4e-75	734	88.4	93.3
TRINITY_DN25393_c0_g1	VDN56391.1	unnamed protein product [Dracunculus medinensis]	588	1.8e-16	236	22.8	30.4
TRINITY_DN19206_c0_g1	XP_019755211.1	PREDICTED: protein mab-21 [Dendroctonus ponderosae] >ENN80077.1 hypothetical protein YQE_03493, partial [Dendroctonus ponderosae] >ERL86289.1 hypothetical protein D910_03697 [Dendroctonus ponderosae]	365	7.8e-205	1858	100	100
TRINITY_DN23787_c2_g1	XP_019773357.1	PREDICTED: glutamate--cysteine ligase [Dendroctonus ponderosae] >ENN81558.1 hypothetical protein YQE_02087, partial [Dendroctonus ponderosae] >ERL91823.1 hypothetical protein D910_09148 [Dendroctonus ponderosae]	636	0	3343	97.8	98.7
TRINITY_DN26522_c1_g2	XP_019770383.1	PREDICTED: integrin beta-nu-like [Dendroctonus ponderosae]	55	6.9e-22	278	83.6	90.9
TRINITY_DN20786_c5_g1	XP_019770467.1	PREDICTED: estradiol 17-beta-dehydrogenase 11-like [Dendroctonus ponderosae] >XP_019770468.1 PREDICTED: estradiol 17-beta-dehydrogenase 11-like [Dendroctonus ponderosae] >ENN71199.1 hypothetical protein YQE_12128, partial [Dendroctonus ponderosae] >ERL89192.1 hypothetical protein D910_06566 [Dendroctonus ponderosae]	32	3.2e-06	140	78.1	84.4
TRINITY_DN20924_c0_g1	CTR11696.1	tnp [Calliphora vicina] >CTR11722.1 tnp [Calliphora vicina]	71	1.4e-19	256	63.4	81.7
TRINITY_DN23837_c0_g1	ERL84353.1	hypothetical protein D910_01778 [Dendroctonus ponderosae] >ERL88434.1 hypothetical protein D910_05820 [Dendroctonus ponderosae]	200	7e-105	997	91	97
TRINITY_DN27615_c2_g1	ROT79945.1	hypothetical protein C7M84_001332 [Penaeus vannamei]	113	1.4e-53	554	96.5	96.5
TRINITY_DN25768_c0_g2	XP_019757988.1	PREDICTED: bromodomain adjacent to zinc finger domain protein 2B isoform X3 [Dendroctonus ponderosae]	835	0	3127	90.7	91.9
TRINITY_DN25475_c0_g1	ERL95343.1	hypothetical protein D910_12608 [Dendroctonus ponderosae]	346	3.8e-188	1717	96.5	98
TRINITY_DN20638_c0_g1	XP_019757472.1	PREDICTED: 28S ribosomal protein S2, mitochondrial [Dendroctonus ponderosae]	269	1.4e-132	1234	89.6	91.1
TRINITY_DN25202_c0_g1	ENN72100.1	hypothetical protein YQE_11239, partial [Dendroctonus ponderosae]	207	5.1e-129	1207	99	99.5
TRINITY_DN13658_c0_g1	XP_019759882.1	PREDICTED: cilia- and flagella-associated protein 70 [Dendroctonus ponderosae]	279	3.7e-151	1393	94.3	96.4
TRINITY_DN36226_c0_g1	XP_019773441.1	PREDICTED: neuroligin-1-like, partial [Dendroctonus ponderosae]	68	5.3e-32	360	95.6	98.5
TRINITY_DN35599_c0_g1	KFD45610.1	hypothetical protein M513_13515 [Trichuris suis]	103	9.5e-10	171	39.8	53.4
TRINITY_DN19542_c0_g8	XP_019663471.1	PREDICTED: 60S ribosomal protein L21 isoform X1 [Ailuropoda melanoleuca]	118	6.6e-60	603	100	100
TRINITY_DN23724_c2_g4	AEE61792.1	unknown [Dendroctonus ponderosae] >ERL93846.1 hypothetical protein D910_11132 [Dendroctonus ponderosae]	523	7.6e-281	2514	91.2	94.6
TRINITY_DN27744_c0_g1	PZC76544.1	hypothetical protein B5X24_HaOG204443 [Helicoverpa armigera]	72	2.6e-11	188	45.8	62.5
TRINITY_DN19952_c0_g3	XP_019772756.1	PREDICTED: uncharacterized protein LOC109546275 [Dendroctonus ponderosae] >XP_019772757.1 PREDICTED: uncharacterized protein LOC109546275 [Dendroctonus ponderosae]	40	4.7e-11	182	95	95
TRINITY_DN24072_c0_g3	XP_019755189.1	PREDICTED: retinal homeobox protein Rx1-like [Dendroctonus ponderosae]	206	1e-97	932	98.1	99
TRINITY_DN24896_c0_g3	XP_019765325.1	PREDICTED: monocarboxylate transporter 13-like [Dendroctonus ponderosae]	604	0	3012	97.5	98.5
TRINITY_DN24758_c0_g1	XP_019773030.1	PREDICTED: uncharacterized protein LOC109546493 [Dendroctonus ponderosae] >ENN81734.1 hypothetical protein YQE_01873, partial [Dendroctonus ponderosae] >ERL91420.1 hypothetical protein D910_08752 [Dendroctonus ponderosae]	164	1.2e-92	889	97	98.2
TRINITY_DN21399_c1_g2	XP_019753658.1	PREDICTED: prion-like-(Q/N-rich) domain-bearing protein 25 isoform X2 [Dendroctonus ponderosae]	397	1.5e-160	1479	78.3	86.9
TRINITY_DN18240_c0_g1	XP_023309862.1	uncharacterized protein LOC111691384 [Anoplophora glabripennis]	83	4.1e-13	201	50.6	60.2
TRINITY_DN8808_c0_g1	ERL91872.1	hypothetical protein D910_09196 [Dendroctonus ponderosae]	125	7.2e-59	594	95.2	97.6
TRINITY_DN20129_c0_g3	XP_011874268.1	PREDICTED: uncharacterized protein LOC105565573 [Vollenhovia emeryi]	90	2.6e-26	312	60	76.7
TRINITY_DN36064_c0_g1	RUS70069.1	hypothetical protein EGW08_022161 [Elysia chlorotica]	56	4.2e-16	224	73.2	87.5
TRINITY_DN20537_c0_g6	PNF20024.1	hypothetical protein B7P43_G05948 [Cryptotermes secundus]	141	4.7e-31	356	56.7	70.2
TRINITY_DN27490_c1_g2	XP_028143739.1	uncharacterized protein LOC114337489 [Diabrotica virgifera virgifera]	381	1.6e-91	880	51.4	60.6
TRINITY_DN35816_c0_g1	ERL94448.1	hypothetical protein D910_11725 [Dendroctonus ponderosae]	65	3e-25	302	93.8	95.4
TRINITY_DN22343_c0_g4	XP_018567995.1	tigger transposable element-derived protein 6-like [Anoplophora glabripennis]	166	1.4e-57	588	65.1	77.1
TRINITY_DN23294_c0_g1	XP_019756515.1	PREDICTED: uncharacterized protein LOC109535128 [Dendroctonus ponderosae]	326	2.5e-156	1439	91.7	94.8
TRINITY_DN26773_c0_g3	ENN83340.1	hypothetical protein YQE_00301, partial [Dendroctonus ponderosae]	44	1.9e-11	186	88.6	90.9
TRINITY_DN25790_c1_g5	XP_019757841.1	PREDICTED: zinc finger BED domain-containing protein 1-like [Dendroctonus ponderosae] >XP_019757842.1 PREDICTED: zinc finger BED domain-containing protein 1-like [Dendroctonus ponderosae] >XP_019757843.1 PREDICTED: zinc finger BED domain-containing protein 1-like [Dendroctonus ponderosae] >XP_019757844.1 PREDICTED: zinc finger BED domain-containing protein 1-like [Dendroctonus ponderosae]	79	1.4e-31	357	83.5	93.7
TRINITY_DN20846_c0_g4	CAB66478.1	hypothetical protein [Homo sapiens]	164	3.6e-50	520	100	100
TRINITY_DN25289_c0_g7	ERL87604.1	hypothetical protein D910_04995 [Dendroctonus ponderosae]	158	4.7e-62	626	76.6	86.1
TRINITY_DN27708_c0_g2	ERL94607.1	hypothetical protein D910_11884 [Dendroctonus ponderosae]	322	5.7e-81	789	54	62.4
TRINITY_DN27390_c1_g1	XP_019767814.1	PREDICTED: uncharacterized protein LOC109542836 [Dendroctonus ponderosae]	1253	0	5199	87.5	90.5
TRINITY_DN22183_c0_g1	ENN76472.1	hypothetical protein YQE_06926, partial [Dendroctonus ponderosae]	412	6.6e-204	1852	96.6	97.6
TRINITY_DN22421_c0_g1	XP_019768937.1	PREDICTED: mediator of RNA polymerase II transcription subunit 16 [Dendroctonus ponderosae]	674	0	3359	96	98.8
TRINITY_DN22463_c0_g3	ENN83360.1	hypothetical protein YQE_00281, partial [Dendroctonus ponderosae] >ENN83361.1 hypothetical protein YQE_00280, partial [Dendroctonus ponderosae]	128	7e-70	689	100	100
TRINITY_DN22958_c4_g3	ENN76703.1	hypothetical protein YQE_06768, partial [Dendroctonus ponderosae]	99	3.5e-29	342	65.7	72.7
TRINITY_DN23162_c0_g3	ENN70426.1	hypothetical protein YQE_12931, partial [Dendroctonus ponderosae]	91	1.7e-46	486	100	100
TRINITY_DN27621_c0_g3	PNF33551.1	hypothetical protein B7P43_G17321 [Cryptotermes secundus]	82	1.6e-08	160	42.7	64.6
TRINITY_DN26414_c0_g1	XP_022188904.1	zinc finger protein 33A-like [Nilaparvata lugens]	55	8.5e-12	194	54.5	74.5
TRINITY_DN22866_c0_g1	ERL86060.1	hypothetical protein D910_03474 [Dendroctonus ponderosae]	592	1.5e-132	1236	68.6	71.5
TRINITY_DN20325_c1_g3	XP_019764761.1	PREDICTED: acetylcholine receptor subunit beta-like 2 [Dendroctonus ponderosae]	224	8.1e-122	1139	99.6	99.6
TRINITY_DN15332_c0_g1	XP_019764582.1	PREDICTED: putative odorant receptor 92a [Dendroctonus ponderosae]	185	9.8e-69	681	77.8	77.8
TRINITY_DN22199_c0_g5	PIK33269.1	hypothetical protein BSL78_29914 [Apostichopus japonicus]	74	8e-09	161	47.3	62.2
TRINITY_DN24038_c2_g2	EFN82703.1	hypothetical protein EAI_17618, partial [Harpegnathos saltator]	87	4.7e-25	301	63.2	75.9
TRINITY_DN19113_c0_g2	XP_019761640.1	PREDICTED: attacin-B-like [Dendroctonus ponderosae]	141	1.3e-42	455	88.7	92.2
TRINITY_DN23708_c0_g4	XP_019758835.1	PREDICTED: 3-hydroxy-3-methylglutaryl-coenzyme A reductase-like [Dendroctonus ponderosae]	835	0	4005	95.6	98.2
TRINITY_DN26778_c1_g5	ENN72456.1	hypothetical protein YQE_10799, partial [Dendroctonus ponderosae]	130	1.9e-64	645	100	100
TRINITY_DN17120_c0_g1	XP_019757578.1	PREDICTED: leucine carboxyl methyltransferase 1 [Dendroctonus ponderosae] >ENN78505.1 hypothetical protein YQE_05025, partial [Dendroctonus ponderosae] >ERL88790.1 hypothetical protein D910_06172 [Dendroctonus ponderosae]	310	1.6e-179	1639	97.4	98.7
TRINITY_DN24290_c0_g1	XP_019755001.1	PREDICTED: LIM domain-binding protein 2 isoform X2 [Dendroctonus ponderosae] >XP_019755002.1 PREDICTED: LIM domain-binding protein 2 isoform X2 [Dendroctonus ponderosae]	386	1.5e-203	1850	96.6	97.2
TRINITY_DN24909_c0_g1	XP_019763335.1	PREDICTED: 39S ribosomal protein L46, mitochondrial [Dendroctonus ponderosae] >AEE62479.1 unknown [Dendroctonus ponderosae] >ENN75252.1 hypothetical protein YQE_08168, partial [Dendroctonus ponderosae] >ERL84937.1 hypothetical protein D910_02360 [Dendroctonus ponderosae]	259	9.5e-127	1183	90	93.8
TRINITY_DN25143_c1_g8	KFM70347.1	Transposable element Tcb1 transposase, partial [Stegodyphus mimosarum]	90	4.3e-10	175	42.2	58.9
TRINITY_DN23640_c0_g9	ERL94441.1	hypothetical protein D910_11718, partial [Dendroctonus ponderosae]	317	1.6e-139	1297	96.5	97.2
TRINITY_DN19542_c0_g4	XP_014046967.1	PREDICTED: glyceraldehyde-3-phosphate dehydrogenase [Salmo salar]	248	6.6e-104	985	83.9	89.9
TRINITY_DN20851_c1_g1	XP_023030472.1	uncharacterized protein LOC111518285, partial [Leptinotarsa decemlineata]	165	3.2e-25	305	37.6	57.6
TRINITY_DN21783_c0_g1	XP_019764340.1	PREDICTED: protein AAR2 homolog isoform X1 [Dendroctonus ponderosae] >ENN74726.1 hypothetical protein YQE_08693, partial [Dendroctonus ponderosae] >ERL94601.1 hypothetical protein D910_11878 [Dendroctonus ponderosae]	133	3.4e-68	681	96.2	100
TRINITY_DN18819_c0_g2	ERL85261.1	hypothetical protein D910_02682 [Dendroctonus ponderosae]	217	1.6e-100	958	80.2	91.7
TRINITY_DN22507_c0_g1	ENN72041.1	hypothetical protein YQE_11329, partial [Dendroctonus ponderosae]	36	4.8e-12	191	97.2	100
TRINITY_DN35338_c0_g1	RZF32164.1	hypothetical protein LSTR_LSTR004027 [Laodelphax striatella]	33	5.8e-09	163	100	100
TRINITY_DN26107_c0_g1	XP_019764835.1	PREDICTED: diphthine--ammonia ligase isoform X1 [Dendroctonus ponderosae] >XP_019764836.1 PREDICTED: diphthine--ammonia ligase isoform X1 [Dendroctonus ponderosae] >XP_019764837.1 PREDICTED: diphthine--ammonia ligase isoform X1 [Dendroctonus ponderosae] >XP_019764838.1 PREDICTED: diphthine--ammonia ligase isoform X1 [Dendroctonus ponderosae] >XP_019764839.1 PREDICTED: diphthine--ammonia ligase is…	694	0	3368	92.8	95.2
TRINITY_DN27328_c0_g1	XP_019762578.1	PREDICTED: 1-phosphatidylinositol 3-phosphate 5-kinase isoform X2 [Dendroctonus ponderosae]	1814	0	8669	93.6	96.2
TRINITY_DN27556_c1_g6	XP_028154676.1	uncharacterized protein LOC114348278, partial [Diabrotica virgifera virgifera]	129	5e-13	202	34.9	60.5
TRINITY_DN18514_c0_g1	XP_019770044.1	PREDICTED: short-chain dehydrogenase/reductase family 16C member 6-like [Dendroctonus ponderosae] >ENN71347.1 hypothetical protein YQE_11962, partial [Dendroctonus ponderosae]	310	1.9e-165	1517	92.6	96.8
TRINITY_DN24566_c0_g1	XP_019768133.1	PREDICTED: protein gooseberry-like [Dendroctonus ponderosae]	507	1.3e-263	2365	95.9	97.2
TRINITY_DN21889_c0_g6	ENN72037.1	hypothetical protein YQE_11325, partial [Dendroctonus ponderosae]	41	1.8e-06	141	68.3	73.2
TRINITY_DN19933_c0_g3	KDR20826.1	Reticulocyte-binding protein 2-like protein a [Zootermopsis nevadensis]	106	8.5e-06	136	33	50.9
TRINITY_DN17327_c0_g1	XP_019762092.1	PREDICTED: cardioacceleratory peptide receptor [Dendroctonus ponderosae]	153	1.1e-76	751	99.3	100
TRINITY_DN27720_c7_g1	XP_019763936.1	PREDICTED: probable E3 ubiquitin-protein ligase HERC1 isoform X1 [Dendroctonus ponderosae]	4380	0	20858	93.4	96.2
TRINITY_DN20629_c3_g3	KYN50674.1	RNA-directed DNA polymerase from mobile element jockey, partial [Trachymyrmex septentrionalis]	121	1.1e-32	368	59.5	71.9
TRINITY_DN26894_c1_g2	KRT85693.1	hypothetical protein AMK59_2486 [Oryctes borbonicus]	93	9.5e-06	136	41.9	48.4
TRINITY_DN21792_c3_g4	XP_014296442.1	PREDICTED: uncharacterized protein LOC103575377, partial [Microplitis demolitor]	64	4.2e-07	152	50	68.8
TRINITY_DN23639_c1_g2	ERL95292.1	hypothetical protein D910_12558 [Dendroctonus ponderosae]	131	4e-65	651	96.2	98.5
TRINITY_DN26518_c1_g7	XP_019767396.1	PREDICTED: uncharacterized protein LOC109542565 [Dendroctonus ponderosae]	88	1.9e-34	383	75	85.2
TRINITY_DN20690_c0_g7	ROT79943.1	senescence-associated protein [Penaeus vannamei]	115	1.7e-26	315	62.6	67
TRINITY_DN18227_c0_g1	APS87122.1	MN-Beta2 [Dicentrarchus labrax] >ASF87053.1 MN-hemoglobin beta 2, partial [Dicentrarchus labrax]	147	2.3e-70	694	87.1	93.2
TRINITY_DN22060_c1_g5	XP_017041073.1	PREDICTED: uncharacterized protein LOC108087980, partial [Drosophila ficusphila]	141	2.1e-06	143	26.2	48.9
TRINITY_DN25620_c1_g3	XP_022207868.1	uncharacterized protein LOC111064440 [Nilaparvata lugens]	75	7.5e-06	135	41.3	57.3
TRINITY_DN14695_c0_g2	XP_024875701.1	uncharacterized protein LOC112457062 [Temnothorax curvispinosus]	71	1.7e-15	219	53.5	70.4
TRINITY_DN20311_c0_g1	XP_019764931.1	PREDICTED: NGFI-A-binding protein homolog isoform X2 [Dendroctonus ponderosae]	99	1.8e-43	461	98	98
TRINITY_DN25759_c0_g1	XP_025407322.1	uncharacterized protein LOC112681274 [Sipha flava]	85	4.3e-07	148	38.8	51.8
TRINITY_DN20091_c0_g1	ENN81910.1	hypothetical protein YQE_01707, partial [Dendroctonus ponderosae] >ERL95279.1 hypothetical protein D910_12545 [Dendroctonus ponderosae]	123	1.2e-50	524	78.9	84.6
TRINITY_DN24355_c1_g5	XP_019772487.1	PREDICTED: uncharacterized protein LOC109546092, partial [Dendroctonus ponderosae]	147	2.7e-62	626	83.7	87.8
TRINITY_DN12350_c0_g1	XP_019768999.1	PREDICTED: sodium-coupled neutral amino acid transporter 5 isoform X2 [Dendroctonus ponderosae]	121	4.7e-47	492	80.2	93.4
TRINITY_DN26267_c1_g1	XP_014365539.1	PREDICTED: RNA-directed DNA polymerase from mobile element jockey-like [Papilio machaon]	208	7e-41	443	47.6	64.4
TRINITY_DN2751_c0_g2	XP_019765480.1	PREDICTED: neurotrimin-like isoform X2 [Dendroctonus ponderosae]	96	3.3e-48	501	97.9	100
TRINITY_DN23799_c0_g2	XP_019763069.1	PREDICTED: peroxisomal membrane protein 2 [Dendroctonus ponderosae] >AEE62347.1 unknown [Dendroctonus ponderosae] >ENN75473.1 hypothetical protein YQE_08022, partial [Dendroctonus ponderosae] >ERL83998.1 hypothetical protein D910_01314 [Dendroctonus ponderosae] >ERL90089.1 hypothetical protein D910_07443 [Dendroctonus ponderosae]	204	6.5e-96	917	90.7	90.7
TRINITY_DN19951_c0_g1	OXU25214.1	hypothetical protein TSAR_003005 [Trichomalopsis sarcophagae]	96	8.8e-36	395	76	89.6
TRINITY_DN27446_c1_g1	XP_019759797.1	PREDICTED: uncharacterized protein LOC109537476 isoform X1 [Dendroctonus ponderosae]	69	3.6e-31	353	97.1	98.6
TRINITY_DN25289_c0_g5	ERL87604.1	hypothetical protein D910_04995 [Dendroctonus ponderosae]	253	8.9e-113	1065	78.7	87.4
TRINITY_DN31308_c0_g1	XP_011567400.1	PREDICTED: trehalase-like [Plutella xylostella]	83	5e-24	292	63.9	79.5
TRINITY_DN14231_c0_g1	XP_019770384.1	PREDICTED: LOW QUALITY PROTEIN: leucine-rich repeat-containing protein 34-like [Dendroctonus ponderosae]	108	1.8e-50	521	88.9	93.5
TRINITY_DN19755_c0_g1	XP_019754070.1	PREDICTED: toll-like receptor 7 [Dendroctonus ponderosae]	1311	0	4512	96.8	97.3
TRINITY_DN11191_c0_g1	XP_024890347.1	craniofacial development protein 2-like [Temnothorax curvispinosus]	103	3e-23	286	50.5	68.9
TRINITY_DN18664_c0_g1	XP_019759982.1	PREDICTED: hexokinase type 2-like [Dendroctonus ponderosae]	347	8.7e-190	1727	93.9	98
TRINITY_DN35820_c0_g1	XP_022183002.1	zinc finger BED domain-containing protein 5-like [Myzus persicae]	74	6.7e-12	187	52.7	70.3
TRINITY_DN29808_c0_g1	KPP75778.1	hypothetical protein Z043_104960 [Scleropages formosus]	72	3.5e-32	362	93.1	98.6
TRINITY_DN20010_c0_g1	XP_019754444.1	PREDICTED: uncharacterized protein LOC109533546 isoform X1 [Dendroctonus ponderosae] >ENN80543.1 hypothetical protein YQE_03037, partial [Dendroctonus ponderosae]	269	5.4e-121	1134	77.3	84.4
TRINITY_DN25980_c1_g2	XP_019757383.1	PREDICTED: LOW QUALITY PROTEIN: probable phosphorylase b kinase regulatory subunit alpha [Dendroctonus ponderosae]	73	2.4e-31	359	95.9	100
TRINITY_DN24447_c0_g1	ERL91879.1	hypothetical protein D910_09203 [Dendroctonus ponderosae]	167	7e-27	326	94.6	95.8
TRINITY_DN20733_c0_g6	XP_015429412.1	PREDICTED: tigger transposable element-derived protein 1-like [Dufourea novaeangliae]	36	1.7e-06	143	83.3	91.7
TRINITY_DN26543_c0_g1	ERL95032.1	hypothetical protein D910_12302, partial [Dendroctonus ponderosae]	300	2.4e-158	1461	95	96.7
TRINITY_DN23012_c0_g2	PNF33053.1	Retrovirus-related Pol polyprotein from transposon TNT 1-94 [Cryptotermes secundus]	236	9.5e-58	589	46.6	71.2
TRINITY_DN26496_c0_g1	ENN76323.1	hypothetical protein YQE_07286, partial [Dendroctonus ponderosae]	660	0	2890	89.2	90
TRINITY_DN23375_c0_g1	XP_019767064.1	PREDICTED: uncharacterized protein LOC109542320 [Dendroctonus ponderosae]	343	8e-131	1222	78.4	83.4
TRINITY_DN10697_c0_g2	XP_004924567.1	probable pterin-4-alpha-carbinolamine dehydratase [Bombyx mori]	127	1.3e-34	387	57.5	75.6
TRINITY_DN24888_c0_g2	XP_019761049.1	PREDICTED: dual specificity mitogen-activated protein kinase kinase 4 isoform X1 [Dendroctonus ponderosae]	292	2.3e-167	1539	99.7	100
TRINITY_DN20067_c0_g2	XP_024875701.1	uncharacterized protein LOC112457062 [Temnothorax curvispinosus]	68	8.5e-20	255	61.8	79.4
TRINITY_DN20105_c0_g4	KFD56614.1	hypothetical protein M513_02290 [Trichuris suis] >KFD66784.1 hypothetical protein M514_02290 [Trichuris suis]	75	1.3e-20	262	54.7	69.3
TRINITY_DN16798_c0_g1	XP_019757761.1	PREDICTED: UPF0488 protein CG14286 [Dendroctonus ponderosae] >ENN78344.1 hypothetical protein YQE_05146, partial [Dendroctonus ponderosae] >ERL87927.1 hypothetical protein D910_05315 [Dendroctonus ponderosae]	212	1.8e-95	913	86.3	90.6
TRINITY_DN25291_c0_g1	XP_019771838.1	PREDICTED: lateral signaling target protein 2 homolog [Dendroctonus ponderosae]	794	0	3712	95.1	97
TRINITY_DN17019_c0_g2	XP_019766729.1	PREDICTED: brain-specific homeobox protein-like [Dendroctonus ponderosae]	162	8.7e-50	518	67.9	68.5
TRINITY_DN22556_c4_g3	ENN70861.1	hypothetical protein YQE_12439, partial [Dendroctonus ponderosae]	301	8.7e-171	1564	98	99
TRINITY_DN12895_c0_g1	XP_019764383.1	PREDICTED: microtubule-actin cross-linking factor 1 isoform X21 [Dendroctonus ponderosae]	28	5.9e-08	155	100	100
TRINITY_DN22561_c0_g2	XP_019760807.1	PREDICTED: V-type proton ATPase 16 kDa proteolipid subunit [Dendroctonus ponderosae] >ENN76641.1 hypothetical protein YQE_06820, partial [Dendroctonus ponderosae] >ERL94370.1 hypothetical protein D910_11650 [Dendroctonus ponderosae]	67	3.2e-25	312	100	100
TRINITY_DN24889_c0_g5	XP_019758289.1	PREDICTED: nose resistant to fluoxetine protein 6-like [Dendroctonus ponderosae]	27	4.7e-06	139	96.3	100
TRINITY_DN21896_c1_g1	XP_019772205.1	PREDICTED: uncharacterized protein LOC109545804 [Dendroctonus ponderosae]	281	4.8e-67	669	57.3	63
TRINITY_DN26981_c0_g2	XP_023019939.1	cytochrome c oxidase subunit 5A, mitochondrial-like [Leptinotarsa decemlineata]	124	3.1e-54	556	79	87.9
TRINITY_DN33105_c0_g1	ERL95961.1	hypothetical protein D910_00693 [Dendroctonus ponderosae]	66	5.8e-23	283	83.3	89.4
TRINITY_DN25965_c0_g1	XP_019772572.1	PREDICTED: uncharacterized protein LOC109546167 [Dendroctonus ponderosae] >ENN82043.1 hypothetical protein YQE_01618, partial [Dendroctonus ponderosae]	478	7.1e-167	1535	75.1	82.4
TRINITY_DN18867_c0_g1	TMS17536.1	hypothetical protein E3U43_001605 [Larimichthys crocea]	222	4.1e-123	1153	100	100
TRINITY_DN21203_c1_g3	ENN83379.1	hypothetical protein YQE_00262, partial [Dendroctonus ponderosae]	36	2.3e-06	139	75	83.3
TRINITY_DN850_c0_g1	KRX33489.1	Chlorophyll a-b binding protein CP29.1, chloroplastic, partial [Trichinella sp. T9]	128	3.6e-61	617	92.2	96.1
TRINITY_DN21661_c0_g1	XP_019758268.1	PREDICTED: sodium- and chloride-dependent transporter XTRP3 isoform X2 [Dendroctonus ponderosae] >XP_019758269.1 PREDICTED: sodium- and chloride-dependent transporter XTRP3 isoform X2 [Dendroctonus ponderosae]	650	0	3337	99.2	99.4
TRINITY_DN12027_c0_g1	ELU11603.1	hypothetical protein CAPTEDRAFT_227478 [Capitella teleta]	72	4.7e-08	155	50	62.5
TRINITY_DN25270_c0_g1	XP_019761001.1	PREDICTED: gamma-tubulin complex component 6-like [Dendroctonus ponderosae]	1392	0	6169	89.2	92.6
TRINITY_DN31770_c0_g1	NP_059095.1	fatty acid-binding protein, liver [Mus musculus] >P12710.2 RecName: Full=Fatty acid-binding protein, liver; AltName: Full=14 kDa selenium-binding protein; AltName: Full=Fatty acid-binding protein 1; AltName: Full=Liver-type fatty acid-binding protein; Short=L-FABP >CAA74989.1 fatty acid binding protein L-FABP [Mus musculus] >AAH09812.1 Fatty acid binding protein 1, liver [Mus musculus] >BAE20841.…	127	2.2e-64	642	100	100
TRINITY_DN27540_c0_g1	XP_019771678.1	PREDICTED: ecdysone receptor isoform X1 [Dendroctonus ponderosae] >XP_019771679.1 PREDICTED: ecdysone receptor isoform X1 [Dendroctonus ponderosae] >XP_019771680.1 PREDICTED: ecdysone receptor isoform X1 [Dendroctonus ponderosae]	558	0	2849	98.7	99.6
TRINITY_DN12360_c0_g1	ENN76338.1	hypothetical protein YQE_07301, partial [Dendroctonus ponderosae]	299	1.3e-152	1407	89.6	94.6
TRINITY_DN25100_c1_g2	XP_019756563.1	PREDICTED: complexin isoform X2 [Dendroctonus ponderosae]	133	8.6e-30	350	99.2	100
TRINITY_DN21471_c1_g4	KMQ87351.1	rna-directed dna polymerase from mobile element jockey-like protein [Lasius niger]	156	4.6e-26	312	44.9	61.5
TRINITY_DN18701_c0_g1	ERL93259.1	hypothetical protein D910_10555 [Dendroctonus ponderosae]	56	1.3e-18	250	96.4	98.2
TRINITY_DN23657_c0_g1	XP_019759139.1	PREDICTED: uncharacterized protein LOC109537054 [Dendroctonus ponderosae]	460	2.5e-184	1683	84.8	88.5
TRINITY_DN26215_c0_g1	XP_019767296.1	PREDICTED: tripartite motif-containing protein 2-like [Dendroctonus ponderosae]	679	0	3105	91.8	94.6
TRINITY_DN27372_c0_g1	ENN83008.1	hypothetical protein YQE_00628, partial [Dendroctonus ponderosae]	273	2.2e-48	509	48.7	54.2
TRINITY_DN21793_c2_g1	KMQ95153.1	endonuclease-reverse transcriptase [Lasius niger]	59	4.3e-09	164	50.8	67.8
TRINITY_DN34521_c0_g1	ACO10754.1	transport protein Sec61 subunit alpha [Caligus rogercresseyi]	72	6.5e-28	325	91.7	95.8
TRINITY_DN31662_c0_g1	BAG57092.1	unnamed protein product [Homo sapiens]	72	5.6e-36	396	100	100
TRINITY_DN20587_c0_g4	XP_019757006.1	PREDICTED: uncharacterized protein LOC109535533 [Dendroctonus ponderosae]	186	1.9e-98	937	94.1	97.3
TRINITY_DN25406_c1_g1	XP_019764267.1	PREDICTED: solute carrier family 26 member 10 [Dendroctonus ponderosae]	434	3.3e-231	2088	95.9	98.6
TRINITY_DN25045_c0_g1	XP_018567328.1	uncharacterized protein LOC108907949 [Anoplophora glabripennis]	138	4.4e-47	499	62.3	76.1
TRINITY_DN26334_c2_g1	XP_019760138.1	PREDICTED: kelch domain-containing protein 3 [Dendroctonus ponderosae]	421	2.3e-214	1941	89.5	91.9
TRINITY_DN26567_c0_g5	XP_019769133.1	PREDICTED: uncharacterized protein LOC109543733 isoform X1 [Dendroctonus ponderosae]	42	9.4e-13	197	88.1	92.9
TRINITY_DN34354_c0_g1	XP_018578361.1	uncharacterized protein LOC108916564 [Anoplophora glabripennis]	57	2e-13	200	63.2	78.9
TRINITY_DN26050_c0_g3	XP_019764153.1	PREDICTED: folliculin-interacting protein 2 isoform X1 [Dendroctonus ponderosae]	1160	0	5363	92.5	95.3
TRINITY_DN21370_c0_g6	XP_022207555.1	anaphase-promoting complex subunit 1-like [Nilaparvata lugens]	205	1.7e-44	474	44.4	61
TRINITY_DN26041_c0_g1	XP_019769678.1	PREDICTED: protein suppressor of forked [Dendroctonus ponderosae] >ENN71639.1 hypothetical protein YQE_11737, partial [Dendroctonus ponderosae] >ERL95267.1 hypothetical protein D910_12533 [Dendroctonus ponderosae]	519	1.1e-186	1702	69.9	73.4
TRINITY_DN27645_c3_g1	XP_019761748.1	PREDICTED: sterol regulatory element-binding protein 1 isoform X2 [Dendroctonus ponderosae]	1025	0	4700	93.7	94.6
TRINITY_DN11241_c0_g1	XP_008181747.1	PREDICTED: putative nuclease HARBI1 [Acyrthosiphon pisum]	100	1.3e-13	203	46	68
TRINITY_DN26057_c1_g1	XP_023310315.1	small G protein signaling modulator 2-like [Anoplophora glabripennis]	1065	0	4073	76.1	83.8
TRINITY_DN26026_c0_g1	AEE62390.1	unknown [Dendroctonus ponderosae]	403	1.6e-169	1554	90.8	90.8
TRINITY_DN24847_c0_g1	ENN77762.1	hypothetical protein YQE_05734, partial [Dendroctonus ponderosae]	338	9.6e-100	951	92.6	93.5
TRINITY_DN21154_c0_g2	ERL92274.1	hypothetical protein D910_09591, partial [Dendroctonus ponderosae]	291	7.3e-159	1463	99	100
TRINITY_DN21924_c0_g5	AAA39567.1	H-2D cell surface glycoprotein, partial [Mus musculus]	174	1.3e-95	912	99.4	100
TRINITY_DN3877_c0_g2	ENN71636.1	hypothetical protein YQE_11734, partial [Dendroctonus ponderosae]	78	1.6e-32	365	89.7	93.6
TRINITY_DN23242_c3_g2	ERL94941.1	hypothetical protein D910_12213 [Dendroctonus ponderosae]	140	1.1e-47	499	73.6	84.3
TRINITY_DN20145_c0_g1	XP_019761643.1	PREDICTED: kinectin-like [Dendroctonus ponderosae]	188	3.1e-80	780	85.1	90.4
TRINITY_DN22743_c0_g2	XP_019755525.1	PREDICTED: carbonic anhydrase 13-like [Dendroctonus ponderosae] >ENN79883.1 hypothetical protein YQE_03702, partial [Dendroctonus ponderosae] >ERL83942.1 hypothetical protein D910_01235 [Dendroctonus ponderosae] >ERL89941.1 hypothetical protein D910_07300 [Dendroctonus ponderosae]	311	6.7e-180	1643	97.1	98.4
TRINITY_DN12360_c0_g2	XP_019761650.1	PREDICTED: aromatic-L-amino-acid decarboxylase-like [Dendroctonus ponderosae]	193	3.7e-107	1012	96.9	97.9
TRINITY_DN27555_c3_g6	ENN76719.1	hypothetical protein YQE_06784, partial [Dendroctonus ponderosae]	42	1.4e-13	202	90.5	92.9
TRINITY_DN19609_c0_g1	PNF19341.1	putative RNA-directed DNA polymerase from transposon X-element [Cryptotermes secundus]	130	9.9e-35	386	53.1	73.8
TRINITY_DN20908_c1_g2	ENN81936.1	hypothetical protein YQE_01647, partial [Dendroctonus ponderosae]	83	3.8e-36	402	97.6	98.8
TRINITY_DN20303_c2_g1	RVE41913.1	hypothetical protein evm_013438 [Chilo suppressalis]	67	5.8e-09	162	50.7	67.2
TRINITY_DN17309_c0_g1	XP_008318291.1	extended synaptotagmin-1 [Cynoglossus semilaevis]	110	5.8e-07	146	31.8	52.7
TRINITY_DN21297_c2_g3	ENN79139.1	hypothetical protein YQE_04325, partial [Dendroctonus ponderosae]	85	1.3e-43	463	100	100
TRINITY_DN25372_c1_g3	AAR09776.1	similar to Drosophila melanogaster betaTub56D, partial [Drosophila yakuba]	88	8.6e-43	454	97.7	100
TRINITY_DN29417_c0_g1	GBP45385.1	Uncharacterized protein YeaG [Eumeta japonica]	95	8.3e-43	455	91.6	95.8
TRINITY_DN15192_c0_g1	ENN80581.1	hypothetical protein YQE_03000, partial [Dendroctonus ponderosae]	56	6.5e-25	302	94.6	98.2
TRINITY_DN19838_c0_g2	XP_018896775.1	PREDICTED: uncharacterized protein LOC109030332 [Bemisia tabaci]	111	6.3e-09	166	37.8	54.1
TRINITY_DN26340_c1_g1	ENN75899.1	hypothetical protein YQE_07541, partial [Dendroctonus ponderosae]	74	9.9e-32	358	90.5	97.3
TRINITY_DN26377_c0_g2	KMQ95932.1	endonuclease-reverse transcriptase [Lasius niger]	66	5.4e-06	138	48.5	65.2
TRINITY_DN10064_c0_g1	XP_019767089.1	PREDICTED: pikachurin-like, partial [Dendroctonus ponderosae]	85	4e-45	474	98.8	98.8
TRINITY_DN22277_c0_g1	XP_019772712.1	PREDICTED: heat shock 70 kDa protein cognate 2-like [Dendroctonus ponderosae]	627	0	3135	99.4	99.8
TRINITY_DN26455_c1_g2	XP_019766420.1	PREDICTED: cell division cycle 5-like protein [Dendroctonus ponderosae]	784	0	3742	98.6	99.5
TRINITY_DN27239_c3_g1	XP_009882179.1	PREDICTED: probable cytosolic iron-sulfur protein assembly protein CIAO1, partial [Charadrius vociferus]	260	7.2e-54	556	76.5	81.5
TRINITY_DN33911_c0_g1	NP_001102393.1	type I inositol 1,4,5-trisphosphate 5-phosphatase [Rattus norvegicus] >NP_001120835.1 type I inositol 1,4,5-trisphosphate 5-phosphatase isoform a [Mus musculus] >XP_021051753.1 type I inositol 1,4,5-trisphosphate 5-phosphatase isoform X2 [Mus pahari] >XP_021023185.1 type I inositol 1,4,5-trisphosphate 5-phosphatase isoform X2 [Mus caroli] >AAH56341.1 Inpp5a protein [Mus musculus] >BAE42408.1 unna…	71	5.6e-32	360	100	100
TRINITY_DN26703_c1_g3	XP_019773542.1	PREDICTED: cytochrome P450 4C1-like isoform X1 [Dendroctonus ponderosae]	159	2.5e-72	711	83.6	90.6
TRINITY_DN23055_c3_g1	XP_019754124.1	PREDICTED: mitochondrial ornithine transporter 1 isoform X1 [Dendroctonus ponderosae] >XP_019754125.1 PREDICTED: mitochondrial ornithine transporter 1 isoform X1 [Dendroctonus ponderosae]	317	1.5e-169	1554	95.3	97.8
TRINITY_DN24323_c0_g2	ENN81051.1	hypothetical protein YQE_02545, partial [Dendroctonus ponderosae] >ERL89659.1 hypothetical protein D910_07022 [Dendroctonus ponderosae]	343	4.1e-191	1743	98.5	99.1
TRINITY_DN21209_c0_g3	XP_019759472.1	PREDICTED: uncharacterized protein LOC109537279 [Dendroctonus ponderosae]	409	1.4e-163	1504	76	81.9
TRINITY_DN22440_c0_g2	VDK17968.1	unnamed protein product [Anisakis simplex]	90	8.1e-15	214	53.3	62.2
TRINITY_DN25198_c0_g2	ERL93074.1	hypothetical protein D910_10376 [Dendroctonus ponderosae]	299	7.9e-171	1566	98	99
TRINITY_DN22925_c0_g1	XP_019758078.1	PREDICTED: integrator complex subunit 11 [Dendroctonus ponderosae]	596	0	3161	98.7	99.7
TRINITY_DN25629_c1_g1	XP_019757284.1	PREDICTED: uncharacterized protein LOC109535752 isoform X4 [Dendroctonus ponderosae] >XP_019757285.1 PREDICTED: uncharacterized protein LOC109535752 isoform X4 [Dendroctonus ponderosae] >XP_019757286.1 PREDICTED: uncharacterized protein LOC109535752 isoform X4 [Dendroctonus ponderosae] >XP_019757288.1 PREDICTED: uncharacterized protein LOC109535752 isoform X4 [Dendroctonus ponderosae]	634	3.7e-309	2761	90.4	94.6
TRINITY_DN19121_c0_g1	ENN71536.1	hypothetical protein YQE_11829, partial [Dendroctonus ponderosae]	373	1.5e-192	1751	91.2	93.6
TRINITY_DN24062_c0_g3	ENN78130.1	hypothetical protein YQE_05284, partial [Dendroctonus ponderosae]	59	8.8e-24	296	93.2	98.3
TRINITY_DN25964_c2_g1	XP_019761861.1	PREDICTED: U4/U6.U5 tri-snRNP-associated protein 2 isoform X2 [Dendroctonus ponderosae] >ENN76082.1 hypothetical protein YQE_07453, partial [Dendroctonus ponderosae] >ERL90701.1 hypothetical protein D910_08048 [Dendroctonus ponderosae]	490	2.9e-285	2552	98	98.6
TRINITY_DN23743_c0_g1	ERL87115.1	hypothetical protein D910_04515 [Dendroctonus ponderosae]	270	8.3e-137	1271	93.3	96.7
TRINITY_DN24901_c0_g2	ENN71636.1	hypothetical protein YQE_11734, partial [Dendroctonus ponderosae]	228	1.4e-125	1172	95.2	97.8
TRINITY_DN22219_c1_g1	XP_025270745.1	uncharacterized protein LOC112639812 [Camponotus floridanus]	102	2.1e-40	434	72.5	86.3
TRINITY_DN20694_c0_g1	XP_019770493.1	PREDICTED: protein transport protein SFT2 [Dendroctonus ponderosae] >AEE63410.1 unknown [Dendroctonus ponderosae] >ENN71295.1 hypothetical protein YQE_12220, partial [Dendroctonus ponderosae] >ERL90552.1 hypothetical protein D910_07900 [Dendroctonus ponderosae]	94	5.3e-43	461	94.7	98.9
TRINITY_DN27116_c0_g1	AEE61794.1	unknown [Dendroctonus ponderosae]	409	4.2e-219	1982	93.6	93.6
TRINITY_DN9002_c0_g1	XP_019758280.1	PREDICTED: guanine nucleotide exchange factor MSS4 homolog [Dendroctonus ponderosae]	123	2.1e-65	652	97.6	98.4
TRINITY_DN25988_c0_g1	XP_019773106.1	PREDICTED: protein ABHD4-like [Dendroctonus ponderosae]	214	4.6e-116	1091	91.1	96.7
TRINITY_DN17284_c0_g3	CCQ42791.1	methionine adenosyltransferase homolog A [Leucosolenia complicata]	125	4.3e-40	432	68.8	76.8
TRINITY_DN31348_c0_g1	XP_018028484.1	PREDICTED: histidine ammonia-lyase-like [Hyalella azteca] >TDM06826.1 histidine ammonia-lyase [Ideonella sp. MAG2]	98	1.5e-27	323	70.4	83.7
TRINITY_DN24647_c1_g1	ERL94494.1	hypothetical protein D910_11771 [Dendroctonus ponderosae]	45	1.1e-06	147	68.9	80
TRINITY_DN35593_c0_g1	AAH73760.1	Keratin 8 [Homo sapiens]	143	2.5e-68	676	100	100
TRINITY_DN24512_c0_g1	XP_019770570.1	PREDICTED: runt-related transcription factor 2 isoform X1 [Dendroctonus ponderosae]	115	2.5e-59	602	100	100
TRINITY_DN25818_c0_g3	CDQ68679.1	unnamed protein product [Oncorhynchus mykiss]	104	9.8e-15	216	43.3	60.6
TRINITY_DN25145_c1_g2	XP_019757461.1	PREDICTED: alpha-ketoglutarate-dependent dioxygenase alkB homolog 4 [Dendroctonus ponderosae]	305	6.8e-171	1564	92.5	96.4
TRINITY_DN9287_c0_g1	XP_017494870.1	PREDICTED: mitochondrial peroxiredoxin PRX1-like [Rhagoletis zephyria]	113	2.1e-36	400	60.2	80.5
TRINITY_DN25027_c2_g1	XP_019764498.1	PREDICTED: dystrobrevin beta-like isoform X2 [Dendroctonus ponderosae]	371	4.7e-214	1938	98.7	98.9
TRINITY_DN10277_c0_g1	ENN70653.1	hypothetical protein YQE_12598, partial [Dendroctonus ponderosae] >ERL92359.1 hypothetical protein D910_09673 [Dendroctonus ponderosae]	38	1.5e-12	193	97.4	100
TRINITY_DN19484_c0_g1	XP_019771898.1	PREDICTED: succinate dehydrogenase [ubiquinone] iron-sulfur subunit, mitochondrial [Dendroctonus ponderosae] >ENN70482.1 hypothetical protein YQE_12985, partial [Dendroctonus ponderosae] >ERL90079.1 hypothetical protein D910_07434 [Dendroctonus ponderosae]	283	6e-152	1401	97.5	98.6
TRINITY_DN22346_c0_g1	XP_019758071.1	PREDICTED: UDP-glucuronosyltransferase 2B16-like [Dendroctonus ponderosae]	524	8e-284	2540	92.7	94.3
TRINITY_DN25774_c1_g1	XP_019771767.1	PREDICTED: magnesium transporter NIPA2 [Dendroctonus ponderosae] >ENN70432.1 hypothetical protein YQE_12936, partial [Dendroctonus ponderosae]	336	4.4e-165	1517	90.8	94.6
TRINITY_DN16003_c0_g1	XP_019767134.1	PREDICTED: chaoptin-like [Dendroctonus ponderosae]	170	1.1e-91	879	95.9	97.1
TRINITY_DN18580_c0_g1	XP_019762760.1	PREDICTED: MICOS complex subunit Mic60-like [Dendroctonus ponderosae]	218	2.7e-107	1014	89	95.9
TRINITY_DN13386_c0_g1	XP_019466605.1	PREDICTED: uncharacterized protein LOC109364423 [Meleagris gallopavo] >BAQ39158.1 ATP-binding protein [Pseudomonas aeruginosa]	93	5e-25	301	65.6	81.7
TRINITY_DN25597_c0_g1	XP_019759661.1	PREDICTED: uncharacterized protein LOC109537397 isoform X1 [Dendroctonus ponderosae] >XP_019759662.1 PREDICTED: uncharacterized protein LOC109537397 isoform X1 [Dendroctonus ponderosae]	1379	0	3851	62.4	67.4
TRINITY_DN22495_c2_g1	XP_019759095.1	PREDICTED: failed axon connections isoform X1 [Dendroctonus ponderosae]	208	1.9e-100	961	95.2	97.6
TRINITY_DN16931_c0_g1	VDM56563.1	unnamed protein product [Angiostrongylus costaricensis]	491	1.1e-98	946	42.6	59.9
TRINITY_DN25606_c0_g3	XP_023017093.1	transient receptor potential cation channel trpm isoform X3 [Leptinotarsa decemlineata]	40	9.4e-08	154	80	87.5
TRINITY_DN13663_c0_g1	XP_019762132.1	PREDICTED: uncharacterized protein LOC109539055 [Dendroctonus ponderosae]	93	8.7e-46	480	93.5	97.8
TRINITY_DN22267_c0_g1	XP_019770317.1	PREDICTED: SWI/SNF-related matrix-associated actin-dependent regulator of chromatin subfamily A-like protein 1 [Dendroctonus ponderosae]	672	0	3014	92.4	95.8
TRINITY_DN20292_c0_g2	XP_019770616.1	PREDICTED: probable G-protein coupled receptor B0563.6 [Dendroctonus ponderosae]	107	2.1e-47	497	97.2	99.1
TRINITY_DN35191_c0_g1	NP_032009.2	FAS-associated factor 1 [Mus musculus] >P54731.2 RecName: Full=FAS-associated factor 1 >AAH65098.1 Fas-associated factor 1 [Mus musculus] >EDL30696.1 Fas-associated factor 1 [Mus musculus]	91	4.3e-45	474	100	100
TRINITY_DN18471_c0_g1	ERL95593.1	hypothetical protein D910_00001, partial [Dendroctonus ponderosae]	204	1.2e-69	692	72.1	79.9
TRINITY_DN21468_c1_g6	XP_019768980.1	PREDICTED: small nuclear ribonucleoprotein F [Dendroctonus ponderosae] >ENN71952.1 hypothetical protein YQE_11386, partial [Dendroctonus ponderosae] >ERL91849.1 hypothetical protein D910_09174 [Dendroctonus ponderosae]	32	8.3e-09	166	93.8	96.9
TRINITY_DN20841_c1_g5	KMQ87351.1	rna-directed dna polymerase from mobile element jockey-like protein [Lasius niger]	109	1.4e-30	351	60.6	78
TRINITY_DN25295_c0_g2	XP_019758503.1	PREDICTED: facilitated trehalose transporter Tret1-like isoform X1 [Dendroctonus ponderosae]	449	3.2e-237	2140	97.1	99.3
TRINITY_DN19446_c0_g1	ERL91096.1	hypothetical protein D910_08438 [Dendroctonus ponderosae]	110	1.3e-50	523	89.1	96.4
TRINITY_DN24358_c0_g2	ERL89853.1	hypothetical protein D910_07212 [Dendroctonus ponderosae]	447	3.2e-214	1941	87.2	91.3
TRINITY_DN26256_c0_g1	XP_019755605.1	PREDICTED: proton-coupled amino acid transporter-like protein CG1139 isoform X1 [Dendroctonus ponderosae]	499	2.3e-275	2467	98.2	99
TRINITY_DN16695_c0_g1	XP_019773129.1	PREDICTED: EF-hand domain-containing family member C2-like [Dendroctonus ponderosae]	763	0	3976	96.3	98
TRINITY_DN21118_c0_g1	XP_019758670.1	PREDICTED: cationic amino acid transporter 4 [Dendroctonus ponderosae]	624	0	3100	98.4	99.5
TRINITY_DN21728_c0_g1	XP_019766981.1	PREDICTED: exonuclease mut-7 homolog isoform X1 [Dendroctonus ponderosae]	870	7.1e-256	2302	56.8	60.5
TRINITY_DN25765_c0_g3	XP_019767790.1	PREDICTED: protein spindle-F isoform X2 [Dendroctonus ponderosae]	37	1.9e-07	154	86.5	89.2
TRINITY_DN26132_c0_g2	XP_019771962.1	PREDICTED: transcriptional regulator ATRX-like isoform X2 [Dendroctonus ponderosae]	86	2.7e-40	433	95.3	98.8
TRINITY_DN23238_c0_g1	ENN81839.1	hypothetical protein YQE_01778, partial [Dendroctonus ponderosae]	123	8.5e-40	436	95.9	96.7
TRINITY_DN6819_c0_g1	XP_019770486.1	PREDICTED: probable glycoprotein hormone G-protein coupled receptor isoform X4 [Dendroctonus ponderosae]	125	2.9e-43	459	89.6	89.6
TRINITY_DN19715_c0_g4	XP_008192655.1	PREDICTED: potassium voltage-gated channel protein eag isoform X7 [Tribolium castaneum] >EFA02607.1 Potassium voltage-gated channel protein eag-like Protein [Tribolium castaneum]	143	2e-57	582	83.9	86
TRINITY_DN21415_c0_g2	XP_011304648.1	PREDICTED: LOW QUALITY PROTEIN: probable uridine-cytidine kinase [Fopius arisanus]	42	6.5e-07	147	61.9	81
TRINITY_DN23033_c0_g4	ERL94008.1	hypothetical protein D910_11293 [Dendroctonus ponderosae]	55	4.6e-26	316	96.4	98.2
TRINITY_DN20275_c0_g4	XP_019756379.1	PREDICTED: uncharacterized protein LOC109535008 [Dendroctonus ponderosae]	52	2.6e-16	231	90.4	90.4
TRINITY_DN20920_c0_g1	ENN70383.1	hypothetical protein YQE_12890, partial [Dendroctonus ponderosae]	336	1.1e-189	1728	94.3	97.3
TRINITY_DN32402_c0_g1	AAQ13507.1	MSTP005 [Homo sapiens]	94	3.2e-48	501	100	100
TRINITY_DN25169_c0_g3	XP_019756656.1	PREDICTED: phosphoglycolate phosphatase 2-like [Dendroctonus ponderosae] >ENN79122.1 hypothetical protein YQE_04309, partial [Dendroctonus ponderosae]	314	8.6e-160	1470	90.8	94.6
TRINITY_DN16839_c0_g1	XP_019757512.1	PREDICTED: uncharacterized protein LOC109535911 [Dendroctonus ponderosae]	147	3.5e-59	599	81	83.7
TRINITY_DN17773_c0_g1	XP_019755677.1	PREDICTED: uncharacterized protein LOC109534450 [Dendroctonus ponderosae]	398	6.6e-215	1944	93.2	96
TRINITY_DN21802_c2_g1	KRX12343.1	Chlorophyll a-b binding protein 40, chloroplastic [Trichinella nelsoni] >KRY99282.1 Chlorophyll a-b binding protein 40, chloroplastic [Trichinella zimbabwensis]	266	4.2e-128	1194	85	91.7
TRINITY_DN27713_c9_g1	XP_019770690.1	PREDICTED: ryanodine receptor isoform X2 [Dendroctonus ponderosae]	5125	0	25431	97.9	98.4
TRINITY_DN11243_c0_g2	XP_019758748.1	PREDICTED: uncharacterized protein LOC109536799 [Dendroctonus ponderosae]	71	7.7e-34	376	95.8	100
TRINITY_DN14803_c0_g1	XP_019642935.1	PREDICTED: GTP-binding nuclear protein Ran [Branchiostoma belcheri]	74	3.2e-30	345	86.5	94.6
TRINITY_DN19959_c0_g5	ERL90344.1	hypothetical protein D910_07693 [Dendroctonus ponderosae]	75	1.1e-29	346	84	89.3
TRINITY_DN26873_c0_g2	XP_019759279.1	PREDICTED: homeobox protein cut isoform X1 [Dendroctonus ponderosae]	193	4e-97	928	97.9	99.5
TRINITY_DN26062_c0_g2	ERL93852.1	hypothetical protein D910_11138 [Dendroctonus ponderosae]	65	1.2e-13	204	90.8	93.8
TRINITY_DN19708_c0_g1	XP_019773628.1	PREDICTED: probable ATP-dependent RNA helicase DDX43 [Dendroctonus ponderosae]	680	0	2963	91.8	93.7
TRINITY_DN21009_c2_g10	XP_013177561.1	PREDICTED: RNA-directed DNA polymerase from mobile element jockey-like [Papilio xuthus]	79	3.8e-10	174	41.8	62
TRINITY_DN27580_c3_g5	ERL94133.1	hypothetical protein D910_11415 [Dendroctonus ponderosae]	66	8.7e-11	182	57.6	77.3
TRINITY_DN26524_c0_g2	XP_019762284.1	PREDICTED: uncharacterized protein LOC109539090, partial [Dendroctonus ponderosae]	593	1e-302	2703	89.5	94.4
TRINITY_DN14655_c0_g1	XP_019769866.1	PREDICTED: glucose dehydrogenase [FAD, quinone]-like [Dendroctonus ponderosae]	324	1.8e-181	1655	95.1	97.2
TRINITY_DN30177_c0_g1	XP_017462515.1	PREDICTED: osmo-independent choline transporter BetT1-like [Rhagoletis zephyria]	75	7.9e-29	333	76	89.3
TRINITY_DN18246_c0_g1	XP_019766218.1	PREDICTED: nucleolar protein 16 [Dendroctonus ponderosae] >AEE62146.1 unknown [Dendroctonus ponderosae] >ENN73571.1 hypothetical protein YQE_09819, partial [Dendroctonus ponderosae] >ERL89486.1 hypothetical protein D910_06852 [Dendroctonus ponderosae]	186	2.1e-95	911	93.5	98.9
TRINITY_DN22160_c2_g1	XP_019773771.1	PREDICTED: peptidoglycan-recognition protein LE-like isoform X1 [Dendroctonus ponderosae]	362	3.3e-173	1587	86.7	89.8
TRINITY_DN27020_c0_g3	ENN80419.1	hypothetical protein YQE_03167, partial [Dendroctonus ponderosae]	67	3.5e-07	150	55.2	64.2
TRINITY_DN31389_c0_g1	XP_028267635.1	glycogen [starch] synthase, muscle [Parambassis ranga]	98	2.7e-21	269	56.1	72.4
TRINITY_DN24756_c0_g1	XP_019767082.1	PREDICTED: retinoblastoma-like protein 2 isoform X2 [Dendroctonus ponderosae] >ENN73092.1 hypothetical protein YQE_10296, partial [Dendroctonus ponderosae]	924	0	4532	95.5	97.1
TRINITY_DN18697_c0_g1	PIK34859.1	gag pol polyprotein [Apostichopus japonicus]	53	1.2e-09	168	62.3	75.5
TRINITY_DN22194_c0_g5	XP_019765762.1	PREDICTED: methylglutaconyl-CoA hydratase, mitochondrial isoform X1 [Dendroctonus ponderosae] >AEE62865.1 unknown [Dendroctonus ponderosae] >ENN73957.1 hypothetical protein YQE_09459, partial [Dendroctonus ponderosae]	249	1.2e-132	1235	96.4	99.6
TRINITY_DN26799_c1_g3	XP_019773168.1	PREDICTED: alpha-mannosidase 2 [Dendroctonus ponderosae]	86	1.5e-39	430	94.2	95.3
TRINITY_DN19132_c1_g3	XP_015782341.1	serine/threonine-protein kinase pim-1 [Tetranychus urticae]	116	1.6e-23	289	55.2	67.2
TRINITY_DN26903_c1_g1	XP_019768247.1	PREDICTED: glycogen synthase kinase-3 beta-like isoform X1 [Dendroctonus ponderosae]	314	9.8e-169	1549	95.2	96.5
TRINITY_DN24474_c2_g1	NP_001257329.1	tubulin alpha-1A chain isoform 2 [Homo sapiens] >XP_004088682.1 PREDICTED: tubulin alpha-1A chain isoform X14 [Nomascus leucogenys] >XP_004088685.1 PREDICTED: tubulin alpha-1A chain isoform X14 [Nomascus leucogenys] >XP_005206319.1 tubulin alpha-1B chain isoform X1 [Bos taurus] >XP_005507920.1 tubulin alpha-1A chain [Columba livia] >XP_005655606.1 tubulin alpha-1A chain isoform X1 [Sus scrofa] >X…	86	7.8e-41	437	100	100
TRINITY_DN23355_c0_g3	ENN77051.1	hypothetical protein YQE_06387, partial [Dendroctonus ponderosae]	393	7.4e-217	1965	96.2	98
TRINITY_DN16973_c0_g1	XP_019765832.1	PREDICTED: brachyurin-like [Dendroctonus ponderosae] >ENN73892.1 hypothetical protein YQE_09510, partial [Dendroctonus ponderosae] >ERL94904.1 hypothetical protein D910_12177 [Dendroctonus ponderosae]	257	2.5e-130	1214	91.1	94.6
TRINITY_DN19760_c0_g1	XP_019771612.1	PREDICTED: zinc finger and BTB domain-containing protein 8A-like isoform X1 [Dendroctonus ponderosae]	538	4.2e-222	2008	76	82
TRINITY_DN22662_c4_g10	KMQ92919.1	endonuclease-reverse transcriptase [Lasius niger]	123	3.1e-20	262	47.2	61.8
TRINITY_DN22676_c1_g1	XP_019770992.1	PREDICTED: omega-amidase NIT2 [Dendroctonus ponderosae] >XP_019770993.1 PREDICTED: omega-amidase NIT2 [Dendroctonus ponderosae] >ENN70795.1 hypothetical protein YQE_12460, partial [Dendroctonus ponderosae] >ERL86247.1 hypothetical protein D910_03657 [Dendroctonus ponderosae]	281	4.3e-157	1447	97.2	99.6
TRINITY_DN21793_c1_g1	XP_019765651.1	PREDICTED: uncharacterized protein LOC109541274 [Dendroctonus ponderosae] >ENN74005.1 hypothetical protein YQE_09395, partial [Dendroctonus ponderosae] >ERL88885.1 hypothetical protein D910_06267 [Dendroctonus ponderosae]	291	9.8e-116	1089	86.6	90.4
TRINITY_DN3519_c0_g1	ENN79877.1	hypothetical protein YQE_03696, partial [Dendroctonus ponderosae]	85	6.8e-45	472	97.6	98.8
TRINITY_DN35419_c0_g1	XP_017486808.1	PREDICTED: apoptotic enhancer 1 protein-like [Rhagoletis zephyria]	95	6.4e-06	136	40	65.3
TRINITY_DN26242_c0_g2	GBP01768.1	hypothetical protein EVAR_1412_1 [Eumeta japonica]	55	1.2e-08	159	63.6	74.5
TRINITY_DN26484_c2_g3	XP_028899225.1	uncharacterized protein LOC114804561 [Zeugodacus cucurbitae]	64	3.7e-09	165	48.4	64.1
TRINITY_DN23926_c0_g1	XP_019764339.1	PREDICTED: LOW QUALITY PROTEIN: poly(ADP-ribose) glycohydrolase [Dendroctonus ponderosae]	697	0	3277	89.7	93.5
TRINITY_DN20517_c0_g2	XP_028132760.1	uncharacterized protein LOC114328175 [Diabrotica virgifera virgifera]	95	3.3e-22	284	60	72.6
TRINITY_DN23879_c1_g3	XP_019765087.1	PREDICTED: filamin-A isoform X2 [Dendroctonus ponderosae]	202	2.3e-115	1085	100	100
TRINITY_DN27455_c0_g1	AEE61541.1	unknown [Dendroctonus ponderosae]	768	0	4040	95.4	97.9
TRINITY_DN22511_c4_g6	XP_019770580.1	PREDICTED: protein yellow-like [Dendroctonus ponderosae] >ENN71076.1 hypothetical protein YQE_12010, partial [Dendroctonus ponderosae]	346	1.1e-184	1683	89.9	94.5
TRINITY_DN23699_c2_g1	ENN83103.1	hypothetical protein YQE_00536, partial [Dendroctonus ponderosae]	95	1.8e-28	334	71.6	81.1
TRINITY_DN17160_c0_g1	XP_015764257.1	PREDICTED: 3-oxoacyl-[acyl-carrier-protein] reductase FabG-like [Acropora digitifera]	69	5e-08	160	47.8	66.7
TRINITY_DN23132_c1_g1	XP_019768351.1	PREDICTED: uncharacterized protein LOC109543207 [Dendroctonus ponderosae]	427	1.2e-169	1556	70.5	82
TRINITY_DN15996_c0_g2	KNC21081.1	hypothetical protein FF38_08697, partial [Lucilia cuprina]	45	1.9e-11	183	82.2	91.1
TRINITY_DN27009_c0_g2	XP_019755635.1	PREDICTED: cathepsin B-like isoform X2 [Dendroctonus ponderosae]	72	3.7e-33	373	87.5	94.4
TRINITY_DN32710_c0_g1	BAB28355.2	unnamed protein product [Mus musculus]	80	9.9e-38	410	100	100
TRINITY_DN27125_c1_g1	XP_019759614.1	PREDICTED: alpha-tocopherol transfer protein-like isoform X3 [Dendroctonus ponderosae] >AEE62064.1 unknown [Dendroctonus ponderosae] >ERL93557.1 hypothetical protein D910_10846 [Dendroctonus ponderosae]	324	2.2e-176	1616	96.3	98.8
TRINITY_DN3434_c0_g1	AAA39424.1	lactate dehydrogenase, partial [Mus musculus]	53	5.7e-22	274	100	100
TRINITY_DN19962_c0_g3	XP_019875602.1	PREDICTED: 28 kDa heat- and acid-stable phosphoprotein [Aethina tumida]	187	1.9e-37	413	82.9	87.2
TRINITY_DN25164_c0_g1	ERL88758.1	hypothetical protein D910_06140 [Dendroctonus ponderosae]	240	4.5e-99	944	85.4	90.8
TRINITY_DN26217_c0_g2	XP_019768467.1	PREDICTED: folliculin isoform X1 [Dendroctonus ponderosae] >ENN72233.1 hypothetical protein YQE_11096, partial [Dendroctonus ponderosae] >ERL91715.1 hypothetical protein D910_09042 [Dendroctonus ponderosae]	289	1.9e-144	1337	88.2	90.7
TRINITY_DN16324_c0_g1	XP_019766611.1	PREDICTED: uncharacterized protein LOC109542025 [Dendroctonus ponderosae]	45	6.8e-18	241	97.8	97.8
TRINITY_DN26007_c0_g1	XP_019759094.1	PREDICTED: uncharacterized protein LOC109537020 [Dendroctonus ponderosae]	279	6.1e-117	1098	78.5	86.4
TRINITY_DN14495_c0_g1	ENN77575.1	hypothetical protein YQE_05871, partial [Dendroctonus ponderosae] >ERL95157.1 hypothetical protein D910_12426 [Dendroctonus ponderosae]	82	3.3e-33	373	90.2	96.3
TRINITY_DN22710_c0_g5	VDK21398.1	unnamed protein product [Anisakis simplex]	52	8.6e-12	187	75	76.9
TRINITY_DN27254_c1_g2	XP_023310386.1	uncharacterized protein LOC111691562 [Anoplophora glabripennis] >XP_023311665.1 uncharacterized protein LOC111692136 [Anoplophora glabripennis] >XP_023311928.1 uncharacterized protein LOC111692253 [Anoplophora glabripennis] >XP_023312231.1 uncharacterized protein LOC111692444 [Anoplophora glabripennis] >XP_023312312.1 uncharacterized protein LOC111692499 [Anoplophora glabripennis]	63	1.7e-08	161	46	63.5
TRINITY_DN17173_c0_g1	ERL92190.1	hypothetical protein D910_09510 [Dendroctonus ponderosae]	109	1.1e-48	506	86.2	89.9
TRINITY_DN27976_c0_g1	XP_017492360.1	PREDICTED: NADPH dehydrogenase-like [Rhagoletis zephyria]	87	7.8e-20	256	50.6	78.2
TRINITY_DN26268_c0_g3	XP_019760592.1	PREDICTED: LOW QUALITY PROTEIN: transient receptor potential protein-like, partial [Dendroctonus ponderosae]	112	9.8e-60	601	97.3	98.2
TRINITY_DN27617_c2_g2	XP_019771001.1	PREDICTED: uncharacterized protein LOC109544988 isoform X1 [Dendroctonus ponderosae]	889	0	3585	85.4	91.6
TRINITY_DN20606_c0_g2	XP_019764882.1	PREDICTED: uncharacterized protein LOC109540832 [Dendroctonus ponderosae]	214	3.5e-97	928	84.1	91.1
TRINITY_DN23188_c2_g3	ENN77914.1	hypothetical protein YQE_05591, partial [Dendroctonus ponderosae]	39	1.3e-10	181	100	100
TRINITY_DN25781_c0_g1	XP_019770732.1	PREDICTED: uncharacterized protein LOC109544820 isoform X2 [Dendroctonus ponderosae]	1291	0	5324	84.7	85.4
TRINITY_DN20443_c0_g2	XP_019772587.1	PREDICTED: branched-chain-amino-acid aminotransferase, cytosolic [Dendroctonus ponderosae]	313	3.6e-179	1636	96.5	97.8
TRINITY_DN20751_c0_g1	XP_019759021.1	PREDICTED: uncharacterized protein LOC109536969 isoform X2 [Dendroctonus ponderosae]	320	3.3e-161	1482	88.1	93.8
TRINITY_DN15133_c0_g1	VDO73823.1	unnamed protein product [Onchocerca flexuosa]	88	2.6e-10	177	45.5	64.8
TRINITY_DN24606_c0_g4	XP_019767900.1	PREDICTED: galactoside 2-alpha-L-fucosyltransferase 2-like isoform X1 [Dendroctonus ponderosae]	186	1.8e-18	248	33.3	50
TRINITY_DN19781_c0_g1	XP_019769497.1	PREDICTED: uncharacterized protein LOC109543977 [Dendroctonus ponderosae]	650	0	2958	90	94
TRINITY_DN17076_c0_g3	XP_003975763.1	PREDICTED: 40S ribosomal protein S15 [Takifugu rubripes]	131	1.7e-66	660	100	100
TRINITY_DN22517_c4_g1	XP_028141507.1	transcription factor Sp4-like [Diabrotica virgifera virgifera]	681	6e-104	991	57.1	64.6
TRINITY_DN23701_c0_g2	ENN76088.1	hypothetical protein YQE_07459, partial [Dendroctonus ponderosae] >ERL90694.1 hypothetical protein D910_08041 [Dendroctonus ponderosae]	367	3.4e-187	1711	93.5	94.3
TRINITY_DN18154_c0_g2	XP_019753605.1	PREDICTED: Down syndrome cell adhesion molecule-like protein Dscam2 [Dendroctonus ponderosae]	290	3.2e-111	1050	90	90.7
TRINITY_DN23312_c0_g2	XP_019758655.1	PREDICTED: protein msta-like isoform X1 [Dendroctonus ponderosae]	533	5.9e-308	2749	93.8	95.9
TRINITY_DN23475_c2_g4	XP_022906824.1	jerky protein homolog-like [Onthophagus taurus]	116	7e-12	189	40.5	56
TRINITY_DN15322_c0_g3	XP_023022161.1	anoctamin-4-like [Leptinotarsa decemlineata]	95	1e-20	264	58.9	81.1
TRINITY_DN22090_c0_g1	XP_019761951.1	PREDICTED: ubiquitin carboxyl-terminal hydrolase 30 homolog [Dendroctonus ponderosae]	458	4.3e-263	2364	99.1	99.1
TRINITY_DN18663_c0_g1	XP_019770076.1	PREDICTED: uncharacterized protein LOC109544376 [Dendroctonus ponderosae] >ENN71359.1 hypothetical protein YQE_11974, partial [Dendroctonus ponderosae]	150	1.3e-21	277	48	62
TRINITY_DN20893_c0_g1	XP_019763761.1	PREDICTED: protein GUCD1 isoform X5 [Dendroctonus ponderosae]	222	6.5e-128	1196	97.7	98.6
TRINITY_DN22826_c1_g4	ENN77084.1	hypothetical protein YQE_06419, partial [Dendroctonus ponderosae]	53	1e-19	263	96.2	96.2
TRINITY_DN12886_c0_g1	ERL90072.1	hypothetical protein D910_07427 [Dendroctonus ponderosae]	98	1.7e-46	491	99	100
TRINITY_DN24541_c0_g1	XP_019769055.1	PREDICTED: LOW QUALITY PROTEIN: DNA topoisomerase 3-beta-1 [Dendroctonus ponderosae]	157	5.1e-58	594	79	80.3
TRINITY_DN14252_c0_g1	ENN77496.1	hypothetical protein YQE_06022, partial [Dendroctonus ponderosae]	101	2.6e-35	390	75.2	78.2
TRINITY_DN35416_c0_g1	ENN80783.1	hypothetical protein YQE_02792, partial [Dendroctonus ponderosae]	60	1.1e-08	160	61.7	63.3
TRINITY_DN11330_c0_g1	XP_001642007.1	predicted protein [Nematostella vectensis] >EDO49944.1 predicted protein [Nematostella vectensis]	69	2.5e-14	209	52.2	78.3
TRINITY_DN24639_c0_g8	XP_019757852.1	PREDICTED: protein lines [Dendroctonus ponderosae] >XP_019757853.1 PREDICTED: protein lines [Dendroctonus ponderosae]	742	0	3309	87.7	92.3
TRINITY_DN1770_c0_g1	GBP01308.1	Modulator of FtsH protease HflK [Eumeta japonica]	35	1.3e-06	142	74.3	88.6
TRINITY_DN20677_c0_g4	XP_011557155.1	PREDICTED: uncharacterized protein LOC105388022 [Plutella xylostella]	164	1.3e-26	317	41.5	56.7
TRINITY_DN24086_c0_g2	XP_014228914.1	myogenesis-regulating glycosidase [Trichogramma pretiosum]	131	1.2e-30	356	49.6	68.7
TRINITY_DN19613_c0_g1	ERL93137.1	hypothetical protein D910_10436 [Dendroctonus ponderosae]	366	2.3e-175	1604	86.1	91.8
TRINITY_DN32729_c0_g1	YP_009034329.1	cytochrome c oxidase subunit III (mitochondrion) [Cultrichthys compressocorpus] >YP_009239876.1 cytochrome c oxidase subunit III (mitochondrion) [Chanodichthys ilishaeformis] >AHZ89254.1 cytochrome c oxidase subunit III (mitochondrion) [Cultrichthys compressocorpus] >AMN14446.1 cytochrome c oxidase subunit III (mitochondrion) [Chanodichthys ilishaeformis]	71	6.7e-30	342	90.1	95.8
TRINITY_DN7332_c0_g1	XP_019771152.1	PREDICTED: odorant receptor Or2-like [Dendroctonus ponderosae]	92	5.8e-21	266	58.7	75
TRINITY_DN19634_c0_g1	XP_019771352.1	PREDICTED: uncharacterized protein LOC109545238 [Dendroctonus ponderosae]	280	2.4e-120	1128	88.2	91.8
TRINITY_DN21683_c1_g15	XP_023313216.1	uncharacterized protein LOC111691290 isoform X1 [Anoplophora glabripennis]	141	3e-37	410	51.8	71.6
TRINITY_DN22496_c1_g1	ERL84459.1	hypothetical protein D910_01891 [Dendroctonus ponderosae]	109	1.3e-40	436	77.1	89
TRINITY_DN10887_c0_g3	XP_002592219.1	hypothetical protein BRAFLDRAFT_206892 [Branchiostoma floridae] >EEN48230.1 hypothetical protein BRAFLDRAFT_206892 [Branchiostoma floridae]	72	4.9e-23	283	73.6	84.7
TRINITY_DN27672_c0_g1	PSN39722.1	PiggyBac transposable element-derived protein 3 [Blattella germanica]	88	5.8e-07	154	39.8	58
TRINITY_DN22207_c1_g2	AGF69208.1	cytochrome P450 CYP4BG2v3 [Dendroctonus valens]	501	9.1e-289	2587	99.2	99.4
TRINITY_DN15270_c0_g1	XP_005956696.1	PREDICTED: carbonic anhydrase, chloroplastic-like [Pantholops hodgsonii]	170	8.7e-26	313	40	55.3
TRINITY_DN11673_c0_g1	XP_016968485.1	PREDICTED: hexose transporter HXT13-like [Drosophila biarmipes] >CAY86677.1 Hxt13p [Saccharomyces cerevisiae EC1118] >EWG87951.1 hypothetical protein P301_O30066 [Saccharomyces cerevisiae P301]	65	4.3e-16	223	60	78.5
TRINITY_DN21482_c2_g3	ENN74148.1	hypothetical protein YQE_09121, partial [Dendroctonus ponderosae]	88	4.1e-37	405	97.7	97.7
TRINITY_DN29537_c0_g1	XP_019757354.1	PREDICTED: uncharacterized protein LOC109535791 isoform X1 [Dendroctonus ponderosae]	72	2.6e-37	406	95.8	97.2
TRINITY_DN27259_c1_g1	ENN72554.1	hypothetical protein YQE_10894, partial [Dendroctonus ponderosae]	204	2.7e-111	1053	96.6	97.5
TRINITY_DN26524_c0_g1	XP_019762284.1	PREDICTED: uncharacterized protein LOC109539090, partial [Dendroctonus ponderosae]	69	8e-28	324	94.2	97.1
TRINITY_DN26413_c0_g2	XP_019763160.1	PREDICTED: bromodomain-containing protein 3-like isoform X9 [Dendroctonus ponderosae]	761	4.1e-295	2643	89.6	90.4
TRINITY_DN11153_c0_g1	XP_005973930.1	PREDICTED: protein NDRG1 [Pantholops hodgsonii]	259	1.6e-142	1318	97.7	98.5
TRINITY_DN27718_c0_g1	XP_019767941.1	PREDICTED: rho-associated protein kinase 1-like [Dendroctonus ponderosae]	122	8.1e-51	528	88.5	95.1
TRINITY_DN31202_c0_g1	XP_005982116.1	PREDICTED: glutathione S-transferase domain-containing protein DDB_G0280881-like [Pantholops hodgsonii]	150	2e-26	315	46	62.7
TRINITY_DN25313_c1_g3	XP_019770453.1	PREDICTED: protein yellow [Dendroctonus ponderosae] >ENN71161.1 hypothetical protein YQE_12091, partial [Dendroctonus ponderosae] >ERL88122.1 hypothetical protein D910_05510 [Dendroctonus ponderosae]	454	5.6e-262	2351	97.1	98.2
TRINITY_DN23721_c2_g2	XP_019753633.1	PREDICTED: solute carrier family 41 member 1-like [Dendroctonus ponderosae]	477	3.2e-259	2329	97.9	99.2
TRINITY_DN18716_c0_g1	XP_019754855.1	PREDICTED: Golgi phosphoprotein 3 homolog sauron [Dendroctonus ponderosae] >ENN80247.1 hypothetical protein YQE_03242, partial [Dendroctonus ponderosae] >ERL94846.1 hypothetical protein D910_12119 [Dendroctonus ponderosae]	285	8.3e-156	1438	97.9	98.9
TRINITY_DN11513_c0_g1	XP_002733114.1	PREDICTED: basic leucine zipper and W2 domain-containing protein 1-like, partial [Saccoglossus kowalevskii]	85	1.3e-11	185	43.5	62.4
TRINITY_DN18932_c0_g4	XP_012584870.1	PREDICTED: zinc finger RNA-binding protein 2 [Condylura cristata]	176	2e-09	176	29	49.4
TRINITY_DN20298_c0_g5	XP_019767920.1	PREDICTED: short neuropeptide F-like [Dendroctonus ponderosae] >ENN72615.1 hypothetical protein YQE_10714, partial [Dendroctonus ponderosae]	102	3.1e-48	506	100	100
TRINITY_DN26721_c2_g2	ERL91964.1	hypothetical protein D910_09287 [Dendroctonus ponderosae]	97	1.3e-29	348	78.4	86.6
TRINITY_DN24074_c0_g1	XP_019760203.1	PREDICTED: peptidyl-prolyl cis-trans isomerase G isoform X2 [Dendroctonus ponderosae]	474	4e-162	1492	90.1	93
TRINITY_DN24343_c0_g4	XP_019769962.1	PREDICTED: uncharacterized protein LOC109544305 [Dendroctonus ponderosae] >XP_019754044.1 PREDICTED: uncharacterized protein LOC109533224 [Dendroctonus ponderosae] >XP_019754045.1 PREDICTED: uncharacterized protein LOC109533225 [Dendroctonus ponderosae]	162	1.5e-63	636	80.9	85.8
TRINITY_DN27383_c2_g1	XP_012524107.1	general transcription factor II-I repeat domain-containing protein 2A-like, partial [Monomorium pharaonis]	75	9.1e-26	307	85.3	94.7
TRINITY_DN25915_c0_g2	XP_019761443.1	PREDICTED: protein outspread [Dendroctonus ponderosae]	1577	0	6859	91.9	93
TRINITY_DN25900_c0_g3	XP_019757057.1	PREDICTED: paired box protein Pax-6-like isoform X1 [Dendroctonus ponderosae]	404	1.3e-49	520	40.6	43.3
TRINITY_DN23351_c0_g2	XP_019765627.1	PREDICTED: tyramine beta-hydroxylase-like, partial [Dendroctonus ponderosae]	446	2.7e-264	2372	97.1	99.1
TRINITY_DN26369_c1_g2	ERL96259.1	hypothetical protein D910_01670 [Dendroctonus ponderosae]	34	1.2e-07	155	91.2	91.2
TRINITY_DN23612_c0_g5	ENN72611.1	hypothetical protein YQE_10710, partial [Dendroctonus ponderosae]	43	1.9e-12	195	90.7	90.7
TRINITY_DN23813_c0_g1	ENN74361.1	hypothetical protein YQE_09331, partial [Dendroctonus ponderosae]	567	1.8e-284	2550	97.2	97.9
TRINITY_DN23116_c1_g1	XP_019768185.1	PREDICTED: aminopeptidase N-like isoform X3 [Dendroctonus ponderosae]	967	0	4761	93.3	96.2
TRINITY_DN22389_c0_g3	VDK17968.1	unnamed protein product [Anisakis simplex]	73	1.2e-15	222	63	72.6
TRINITY_DN20685_c0_g1	XP_019754529.1	PREDICTED: uncharacterized protein LOC109533612 [Dendroctonus ponderosae] >ENN80489.1 hypothetical protein YQE_03093, partial [Dendroctonus ponderosae] >ERL88447.1 hypothetical protein D910_05833 [Dendroctonus ponderosae]	376	2.2e-176	1612	93.4	94.7
TRINITY_DN19105_c0_g1	XP_019773087.1	PREDICTED: uncharacterized protein LOC109546536 [Dendroctonus ponderosae]	412	6.3e-155	1427	77.2	83.3
TRINITY_DN35408_c0_g1	XP_028050534.1	uncharacterized protein LOC114255596 [Monomorium pharaonis]	72	8.6e-33	367	91.7	97.2
TRINITY_DN26799_c1_g2	ENN81639.1	hypothetical protein YQE_01970, partial [Dendroctonus ponderosae]	1025	0	5295	97.1	98.9
TRINITY_DN22296_c0_g2	XP_019768309.1	PREDICTED: neuroendocrine convertase 1-like [Dendroctonus ponderosae]	640	0	3150	93	95.9
TRINITY_DN25526_c0_g1	XP_019767928.1	PREDICTED: apoptosis-resistant E3 ubiquitin protein ligase 1 isoform X1 [Dendroctonus ponderosae] >XP_019767929.1 PREDICTED: apoptosis-resistant E3 ubiquitin protein ligase 1 isoform X1 [Dendroctonus ponderosae] >XP_019767930.1 PREDICTED: apoptosis-resistant E3 ubiquitin protein ligase 1 isoform X1 [Dendroctonus ponderosae]	899	0	4673	98.4	99.1
TRINITY_DN10164_c0_g1	XP_019769823.1	PREDICTED: uncharacterized protein LOC109544195 [Dendroctonus ponderosae]	89	2.8e-41	441	92.1	97.8
TRINITY_DN25942_c0_g1	XP_019770308.1	PREDICTED: histone acetyltransferase KAT6B isoform X1 [Dendroctonus ponderosae]	2819	0	11132	91.6	93.8
TRINITY_DN22284_c0_g2	ENN79296.1	hypothetical protein YQE_04254, partial [Dendroctonus ponderosae]	165	1.2e-67	671	84.2	84.8
TRINITY_DN26340_c0_g5	ERL87484.1	hypothetical protein D910_04876 [Dendroctonus ponderosae]	124	2.7e-39	427	73.4	81.5
TRINITY_DN24428_c0_g1	XP_019756174.1	PREDICTED: uncharacterized protein LOC109534836 [Dendroctonus ponderosae] >AEE63589.1 unknown [Dendroctonus ponderosae]	612	0	3269	97.7	99.3
TRINITY_DN26008_c0_g1	XP_019773531.1	PREDICTED: myosin-IB [Dendroctonus ponderosae]	1023	0	4844	96.5	97.8
TRINITY_DN21518_c1_g3	XP_019765358.1	PREDICTED: tyrosine-protein kinase Dnt [Dendroctonus ponderosae]	548	9.8e-266	2385	93.8	97.3
TRINITY_DN26021_c3_g1	XP_019757685.1	PREDICTED: neprilysin-11 isoform X2 [Dendroctonus ponderosae]	754	0	3857	98	99.5
TRINITY_DN21361_c0_g1	XP_019764244.1	PREDICTED: dynein heavy chain 7, axonemal [Dendroctonus ponderosae]	722	0	3808	98.3	99.3
TRINITY_DN20650_c0_g1	XP_019766662.1	PREDICTED: protein SCO1 homolog, mitochondrial [Dendroctonus ponderosae] >AEE62475.1 unknown [Dendroctonus ponderosae]	278	6.5e-157	1445	97.1	98.9
TRINITY_DN27269_c0_g1	XP_019769199.1	PREDICTED: adenine phosphoribosyltransferase [Dendroctonus ponderosae] >ENN71876.1 hypothetical protein YQE_11491, partial [Dendroctonus ponderosae] >ERL95028.1 hypothetical protein D910_12298 [Dendroctonus ponderosae]	181	3.4e-87	845	95.6	97.2
TRINITY_DN21083_c0_g1	XP_019760018.1	PREDICTED: uncharacterized protein LOC109537651 [Dendroctonus ponderosae]	130	3.9e-16	227	39.2	63.8
TRINITY_DN24102_c0_g1	XP_019773597.1	PREDICTED: uncharacterized protein LOC109546881 [Dendroctonus ponderosae]	89	8.8e-36	402	84.3	92.1
TRINITY_DN16661_c0_g2	RWS01050.1	hypothetical protein B4U79_01057, partial [Dinothrombium tinctorium]	101	9.3e-11	180	38.6	64.4
TRINITY_DN19316_c0_g1	XP_019764403.1	PREDICTED: bromodomain-containing protein 8-like [Dendroctonus ponderosae] >XP_019764404.1 PREDICTED: bromodomain-containing protein 8-like [Dendroctonus ponderosae] >ENN74658.1 hypothetical protein YQE_08775, partial [Dendroctonus ponderosae]	867	0	3620	86.5	89.5
TRINITY_DN24046_c1_g3	XP_012566733.1	PREDICTED: uncharacterized protein LOC100207270 [Hydra vulgaris]	76	1.9e-11	184	48.7	63.2
TRINITY_DN25195_c0_g1	XP_019757691.1	PREDICTED: probable multidrug resistance-associated protein lethal(2)03659 [Dendroctonus ponderosae]	994	0	4868	96.4	98.6
TRINITY_DN20974_c2_g1	XP_019760678.1	PREDICTED: zinc finger protein 660-like [Dendroctonus ponderosae]	67	9.6e-15	217	68.7	73.1
TRINITY_DN21072_c0_g3	ENN74175.1	hypothetical protein YQE_09148, partial [Dendroctonus ponderosae]	134	1.6e-73	725	97	99.3
TRINITY_DN23905_c4_g1	ERL89125.1	hypothetical protein D910_06501 [Dendroctonus ponderosae]	747	1.9e-260	2340	88.6	89.3
TRINITY_DN17189_c0_g1	XP_019760254.1	PREDICTED: uncharacterized protein LOC109537803 isoform X1 [Dendroctonus ponderosae]	312	2e-102	974	68.6	73.4
TRINITY_DN12387_c0_g1	EFA10796.1	gustatory receptor 23 [Tribolium castaneum]	79	2.1e-07	149	40.5	55.7
TRINITY_DN15418_c0_g3	VDM62862.1	unnamed protein product [Angiostrongylus costaricensis]	47	6e-06	137	57.4	72.3
TRINITY_DN24421_c0_g3	XP_019757502.1	PREDICTED: cyclic nucleotide-gated cation channel subunit A-like [Dendroctonus ponderosae]	603	0	3162	100	100
TRINITY_DN21655_c0_g5	XP_019756788.1	PREDICTED: putative leucine-rich repeat-containing protein DDB_G0290503 isoform X2 [Dendroctonus ponderosae]	116	4.7e-40	432	78.4	86.2
TRINITY_DN34051_c0_g1	KFV66998.1	Transaldolase, partial [Picoides pubescens]	68	1.1e-21	271	79.4	82.4
TRINITY_DN22158_c2_g3	XP_019757806.1	PREDICTED: CAS1 domain-containing protein 1 [Dendroctonus ponderosae]	797	0	4164	98.6	99.5
TRINITY_DN17684_c0_g1	XP_019764679.1	PREDICTED: uncharacterized protein LOC109540675 [Dendroctonus ponderosae] >ENN74542.1 hypothetical protein YQE_08865, partial [Dendroctonus ponderosae] >ERL89797.1 hypothetical protein D910_07158 [Dendroctonus ponderosae]	85	9.1e-36	399	91.8	95.3
TRINITY_DN26410_c1_g1	XP_019770739.1	PREDICTED: valine--tRNA ligase [Dendroctonus ponderosae]	1043	0	5088	95.9	97.8
TRINITY_DN23579_c0_g3	XP_019769171.1	PREDICTED: transcription factor SUM-1 isoform X1 [Dendroctonus ponderosae] >ENN71861.1 hypothetical protein YQE_11476, partial [Dendroctonus ponderosae]	31	1.4e-06	142	90.3	90.3
TRINITY_DN20376_c3_g8	ENN77069.1	hypothetical protein YQE_06404, partial [Dendroctonus ponderosae]	116	5.5e-25	305	52.6	69
TRINITY_DN23749_c0_g5	XP_019769949.1	PREDICTED: colorectal mutant cancer protein [Dendroctonus ponderosae]	880	0	4056	98	98.9
TRINITY_DN25388_c0_g2	ERL84129.1	hypothetical protein D910_01480 [Dendroctonus ponderosae] >ERL86221.1 hypothetical protein D910_03632 [Dendroctonus ponderosae] >ERL86662.1 hypothetical protein D910_04068 [Dendroctonus ponderosae]	367	1.8e-164	1511	86.9	89.6
TRINITY_DN22489_c1_g6	ERL85978.1	hypothetical protein D910_03392 [Dendroctonus ponderosae]	59	1.2e-11	188	67.8	76.3
TRINITY_DN25651_c0_g1	XP_019768008.1	PREDICTED: ATP-dependent RNA helicase dbp2-like [Dendroctonus ponderosae]	369	8.3e-208	1887	98.1	98.9
TRINITY_DN21529_c0_g4	ENN77185.1	hypothetical protein YQE_06323, partial [Dendroctonus ponderosae]	278	1.4e-151	1399	97.5	99.3
TRINITY_DN24359_c1_g1	XP_019766005.1	PREDICTED: slit homolog 3 protein-like [Dendroctonus ponderosae]	251	1.4e-73	727	89.6	90.8
TRINITY_DN27007_c0_g2	ENN81983.1	hypothetical protein YQE_01694, partial [Dendroctonus ponderosae]	118	2.2e-40	435	78.8	84.7
TRINITY_DN27652_c10_g1	XP_019763686.1	PREDICTED: uncharacterized protein LOC109540005 isoform X1 [Dendroctonus ponderosae]	97	4.2e-43	459	89.7	92.8
TRINITY_DN25059_c0_g1	XP_024891525.1	uncharacterized protein LOC112467233 [Temnothorax curvispinosus]	68	2e-07	151	45.6	66.2
TRINITY_DN27204_c1_g1	XP_019770585.1	PREDICTED: uncharacterized protein LOC109544715 [Dendroctonus ponderosae]	122	1.1e-52	543	84.4	91
TRINITY_DN24681_c0_g5	XP_019772978.1	PREDICTED: cap-specific mRNA (nucleoside-2'-O-)-methyltransferase 1 isoform X1 [Dendroctonus ponderosae]	747	0	3509	88.1	93.8
TRINITY_DN26785_c0_g2	XP_019772997.1	PREDICTED: irregular chiasm C-roughest protein-like [Dendroctonus ponderosae] >XP_019772998.1 PREDICTED: irregular chiasm C-roughest protein-like [Dendroctonus ponderosae] >ENN81761.1 hypothetical protein YQE_01854, partial [Dendroctonus ponderosae]	812	0	4060	99.5	100
TRINITY_DN21374_c0_g1	XP_019757027.1	PREDICTED: mitochondrial import inner membrane translocase subunit Tim9-like [Dendroctonus ponderosae]	47	2.6e-14	217	89.4	93.6
TRINITY_DN26069_c0_g1	XP_019759530.1	PREDICTED: procollagen-lysine,2-oxoglutarate 5-dioxygenase 1 isoform X1 [Dendroctonus ponderosae]	720	0	3791	96.9	99
TRINITY_DN16917_c0_g1	XP_019754315.1	PREDICTED: LOW QUALITY PROTEIN: uncharacterized protein LOC109533435, partial [Dendroctonus ponderosae]	132	1.4e-44	471	99.2	99.2
TRINITY_DN25788_c0_g8	ENN71006.1	hypothetical protein YQE_12406, partial [Dendroctonus ponderosae]	175	1.7e-90	868	96	97.7
TRINITY_DN27627_c1_g2	ENN71035.1	hypothetical protein YQE_12434, partial [Dendroctonus ponderosae]	303	2.3e-67	672	51.5	61.4
TRINITY_DN11273_c0_g1	XP_019770106.1	PREDICTED: pickpocket protein 28-like [Dendroctonus ponderosae]	87	1.2e-41	444	98.9	100
TRINITY_DN25692_c3_g3	XP_019760707.1	PREDICTED: probable medium-chain specific acyl-CoA dehydrogenase, mitochondrial [Dendroctonus ponderosae] >ENN76743.1 hypothetical protein YQE_06808, partial [Dendroctonus ponderosae] >ERL90384.1 hypothetical protein D910_07733 [Dendroctonus ponderosae]	418	1.3e-242	2186	99.5	100
TRINITY_DN21023_c0_g2	XP_019758479.1	PREDICTED: guanine nucleotide-binding protein G(o) subunit alpha-like isoform X1 [Dendroctonus ponderosae]	359	3e-203	1845	99.7	100
TRINITY_DN31918_c0_g1	XP_010728338.1	cofilin-2 [Larimichthys crocea]	162	9.5e-87	837	100	100
TRINITY_DN5483_c0_g1	KMQ95932.1	endonuclease-reverse transcriptase [Lasius niger]	64	1.8e-11	183	54.7	71.9
TRINITY_DN20604_c1_g5	XP_028173396.1	piggyBac transposable element-derived protein 4-like [Ostrinia furnacalis]	68	1.6e-17	237	63.2	77.9
TRINITY_DN24379_c0_g1	XP_019767593.1	PREDICTED: cytochrome c oxidase subunit 7C, mitochondrial-like [Dendroctonus ponderosae] >XP_019767594.1 PREDICTED: cytochrome c oxidase subunit 7C, mitochondrial-like [Dendroctonus ponderosae]	66	2.4e-27	325	93.9	97
TRINITY_DN27407_c2_g3	ENN76256.1	hypothetical protein YQE_07221, partial [Dendroctonus ponderosae]	378	6.6e-196	1783	89.4	94.7
TRINITY_DN20690_c0_g8	XP_001617879.1	hypothetical protein NEMVEDRAFT_v1g156477 [Nematostella vectensis] >EDO25779.1 predicted protein, partial [Nematostella vectensis]	53	3.7e-08	157	66	73.6
TRINITY_DN22283_c0_g1	XP_019759421.1	PREDICTED: zinc finger protein Xfin-like [Dendroctonus ponderosae]	1493	0	6263	92.2	94.8
TRINITY_DN26810_c0_g2	XP_019754378.1	PREDICTED: E3 ubiquitin-protein ligase HECTD1 isoform X1 [Dendroctonus ponderosae]	2627	0	12588	96.4	97.4
TRINITY_DN20442_c0_g1	XP_019761087.1	PREDICTED: septin-2 isoform X4 [Dendroctonus ponderosae] >AEE62758.1 unknown [Dendroctonus ponderosae]	255	7.3e-144	1331	99.6	99.6
TRINITY_DN25492_c0_g3	XP_019760378.1	PREDICTED: uncharacterized protein LOC109537892 [Dendroctonus ponderosae] >XP_019760379.1 PREDICTED: uncharacterized protein LOC109537892 [Dendroctonus ponderosae]	217	3.9e-105	995	92.6	95.4
TRINITY_DN22031_c0_g1	XP_019762653.1	PREDICTED: ankyrin repeat domain-containing protein SOWAHC isoform X2 [Dendroctonus ponderosae]	151	3.3e-72	714	96	97.4
TRINITY_DN14325_c0_g1	ENN74897.1	hypothetical protein YQE_08475, partial [Dendroctonus ponderosae]	78	4.3e-30	344	89.7	93.6
TRINITY_DN19294_c0_g1	XP_023311772.1	elongation of very long chain fatty acids protein AAEL008004-like [Anoplophora glabripennis]	188	3.2e-61	618	55.3	78.2
TRINITY_DN20772_c1_g5	XP_019755470.1	PREDICTED: uncharacterized protein LOC109534301 [Dendroctonus ponderosae]	144	2e-78	764	92.4	96.5
TRINITY_DN24574_c0_g2	ENN75963.1	hypothetical protein YQE_07497, partial [Dendroctonus ponderosae] >ERL93417.1 hypothetical protein D910_10709 [Dendroctonus ponderosae]	32	2.2e-08	162	96.9	100
TRINITY_DN7015_c0_g1	XP_005954838.1	PREDICTED: soluble starch synthase 1, chloroplastic/amyloplastic-like [Pantholops hodgsonii]	288	1.9e-34	387	35.4	52.4
TRINITY_DN8644_c0_g1	ENN81997.1	hypothetical protein YQE_01572, partial [Dendroctonus ponderosae] >ERL88547.1 hypothetical protein D910_05932 [Dendroctonus ponderosae]	57	2.1e-17	237	82.5	89.5
TRINITY_DN21163_c2_g1	ADI61812.1	endonuclease-reverse transcriptase [Bombyx mori]	111	9.4e-27	320	54.1	73.9
TRINITY_DN21866_c0_g2	XP_019762333.1	PREDICTED: dopamine N-acetyltransferase [Dendroctonus ponderosae]	214	1.5e-114	1080	97.7	99.1
TRINITY_DN23548_c1_g1	XP_019769024.1	PREDICTED: dynamin-1-like protein isoform X2 [Dendroctonus ponderosae]	738	0	3709	98.5	99.6
TRINITY_DN22608_c3_g1	VBB34168.1	unnamed protein product [Acanthocheilonema viteae]	282	3.8e-08	162	23.4	44
TRINITY_DN24457_c0_g2	ENN74423.1	hypothetical protein YQE_09007, partial [Dendroctonus ponderosae]	439	7.8e-175	1599	96.6	97.7
TRINITY_DN20157_c0_g3	XP_019759474.1	PREDICTED: NF-kappa-B-repressing factor-like [Dendroctonus ponderosae]	384	2.7e-175	1605	84.4	88.5
TRINITY_DN23754_c0_g5	ENN78005.1	hypothetical protein YQE_05525, partial [Dendroctonus ponderosae] >ERL85927.1 hypothetical protein D910_03342 [Dendroctonus ponderosae]	242	1.5e-96	923	71.9	75.2
TRINITY_DN21614_c4_g1	XP_019765185.1	PREDICTED: uncharacterized protein LOC109541000 [Dendroctonus ponderosae]	105	2.1e-17	237	55.2	65.7
TRINITY_DN17591_c0_g1	XP_019756482.1	PREDICTED: RNA-binding protein 8A [Dendroctonus ponderosae] >ENN79261.1 hypothetical protein YQE_04297, partial [Dendroctonus ponderosae]	163	3.1e-74	729	87.7	89
TRINITY_DN21146_c1_g4	KFM72822.1	Transposable element P transposase, partial [Stegodyphus mimosarum]	69	9.4e-06	134	42	60.9
TRINITY_DN20356_c2_g7	XP_019766044.1	PREDICTED: TATA-box-binding protein 2 isoform X1 [Dendroctonus ponderosae] >AEE62301.1 unknown [Dendroctonus ponderosae]	243	4.3e-124	1160	92.2	96.3
TRINITY_DN27736_c4_g3	XP_019762700.1	PREDICTED: uncharacterized protein LOC109539422 [Dendroctonus ponderosae]	196	1.5e-43	465	50	73
TRINITY_DN26062_c0_g4	ERL93852.1	hypothetical protein D910_11138 [Dendroctonus ponderosae]	296	2.8e-151	1395	97.3	98.6
TRINITY_DN14434_c0_g1	XP_019761934.1	PREDICTED: cytochrome c oxidase subunit 5B, mitochondrial-like [Dendroctonus ponderosae] >ENN75948.1 hypothetical protein YQE_07483, partial [Dendroctonus ponderosae] >ERL93402.1 hypothetical protein D910_10694 [Dendroctonus ponderosae]	119	1.7e-62	626	94.1	95.8
TRINITY_DN19467_c0_g1	ENN77601.1	hypothetical protein YQE_05896, partial [Dendroctonus ponderosae]	360	8.1e-200	1815	94.2	97.2
TRINITY_DN23415_c0_g1	ENN73079.1	hypothetical protein YQE_10283, partial [Dendroctonus ponderosae] >ERL92731.1 hypothetical protein D910_10041 [Dendroctonus ponderosae]	79	2e-35	397	92.4	94.9
TRINITY_DN21880_c4_g2	PIC33559.1	hypothetical protein B9Z55_013494 [Caenorhabditis nigoni]	41	1.7e-10	177	70.7	82.9
TRINITY_DN26699_c0_g2	ENN76261.1	hypothetical protein YQE_07226, partial [Dendroctonus ponderosae]	180	3e-103	983	100	100
TRINITY_DN25567_c0_g1	XP_019762656.1	PREDICTED: tolloid-like protein 1 isoform X1 [Dendroctonus ponderosae]	511	2.1e-280	2511	93.3	96.3
TRINITY_DN19334_c0_g1	XP_019755018.1	PREDICTED: prothoracicostatic peptide [Dendroctonus ponderosae]	168	1.5e-62	631	97	99.4
TRINITY_DN20542_c1_g1	ERL92544.1	hypothetical protein D910_09857, partial [Dendroctonus ponderosae]	886	0	3928	93.8	94.8
TRINITY_DN24901_c0_g4	XP_019769623.1	PREDICTED: fasciclin-3 isoform X3 [Dendroctonus ponderosae]	439	1.4e-249	2247	98.9	99.5
TRINITY_DN25766_c0_g2	XP_019758475.1	PREDICTED: uncharacterized protein LOC109536621 isoform X5 [Dendroctonus ponderosae]	758	0	3066	85.8	88.9
TRINITY_DN27654_c2_g4	ERL89432.1	hypothetical protein D910_06799 [Dendroctonus ponderosae]	132	1.1e-33	380	65.9	71.2
TRINITY_DN25596_c0_g4	XP_019765912.1	PREDICTED: LOW QUALITY PROTEIN: proto-oncogene tyrosine-protein kinase ROS [Dendroctonus ponderosae]	80	5.7e-13	199	52.5	65
TRINITY_DN19893_c0_g1	XP_017481236.1	PREDICTED: probable ATP-dependent DNA helicase DDX11 [Rhagoletis zephyria]	175	4e-18	245	34.9	56
TRINITY_DN22255_c0_g1	ERL84288.1	hypothetical protein D910_01687 [Dendroctonus ponderosae] >ERL86050.1 hypothetical protein D910_03464 [Dendroctonus ponderosae]	354	1.7e-128	1199	85.3	91
TRINITY_DN15289_c0_g2	XP_019770225.1	PREDICTED: protein yellow-like [Dendroctonus ponderosae] >ENN71147.1 hypothetical protein YQE_12078, partial [Dendroctonus ponderosae]	190	2.5e-85	824	82.1	91.1
TRINITY_DN20660_c0_g1	XP_019755161.1	PREDICTED: uncharacterized protein LOC109534048 [Dendroctonus ponderosae]	146	2.5e-63	637	84.2	88.4
TRINITY_DN14375_c0_g1	XP_019763854.1	PREDICTED: uncharacterized protein LOC109540097 [Dendroctonus ponderosae] >XP_019763855.1 PREDICTED: uncharacterized protein LOC109540097 [Dendroctonus ponderosae] >XP_019763856.1 PREDICTED: uncharacterized protein LOC109540097 [Dendroctonus ponderosae] >ENN75027.1 hypothetical protein YQE_08342, partial [Dendroctonus ponderosae]	338	7.2e-177	1616	89.6	94.7
TRINITY_DN23843_c0_g4	ENN71469.1	hypothetical protein YQE_11886, partial [Dendroctonus ponderosae]	67	1.6e-27	326	92.5	94
TRINITY_DN21017_c0_g5	XP_018577377.1	uncharacterized protein LOC108915741 [Anoplophora glabripennis]	81	2.6e-06	141	35.8	51.9
TRINITY_DN21223_c0_g8	XP_019773643.1	PREDICTED: uncharacterized protein LOC109546911 [Dendroctonus ponderosae]	254	1.7e-109	1035	84.3	87
TRINITY_DN26072_c0_g1	XP_019773343.1	PREDICTED: ubiquitin-protein ligase E3C [Dendroctonus ponderosae] >ENN81570.1 hypothetical protein YQE_02099, partial [Dendroctonus ponderosae]	965	0	4708	95.1	97.2
TRINITY_DN23517_c0_g1	XP_019764769.1	PREDICTED: glutenin, high molecular weight subunit DX5-like [Dendroctonus ponderosae] >ENN74444.1 hypothetical protein YQE_08979, partial [Dendroctonus ponderosae] >ERL88160.1 hypothetical protein D910_05548 [Dendroctonus ponderosae]	355	7.6e-143	1323	79.4	79.4
TRINITY_DN20349_c0_g2	AYW52153.1	cytochrome b (mitochondrion) [Lamiinae sp. 2 ACP-2013]	95	9.6e-40	428	83.2	92.6
TRINITY_DN18826_c0_g1	XP_019759179.1	PREDICTED: brachyurin-like [Dendroctonus ponderosae] >ENN77643.1 hypothetical protein YQE_05937, partial [Dendroctonus ponderosae] >ERL90268.1 hypothetical protein D910_07620 [Dendroctonus ponderosae]	280	8.5e-148	1364	97.5	98.6
TRINITY_DN12442_c0_g1	ENN78389.1	hypothetical protein YQE_05189, partial [Dendroctonus ponderosae]	134	3.7e-66	657	96.3	99.3
TRINITY_DN27300_c1_g6	RVE40329.1	hypothetical protein evm_015021 [Chilo suppressalis]	382	2e-74	736	40.8	59.7
TRINITY_DN20594_c1_g5	ENN73745.1	hypothetical protein YQE_09641, partial [Dendroctonus ponderosae]	62	5.5e-08	155	53.2	62.9
TRINITY_DN1830_c0_g1	XP_019768446.1	PREDICTED: E3 ubiquitin-protein ligase MYCBP2-like [Dendroctonus ponderosae]	123	1.2e-53	549	95.1	97.6
TRINITY_DN17409_c0_g1	ENN71772.1	hypothetical protein YQE_11507, partial [Dendroctonus ponderosae] >ERL89234.1 hypothetical protein D910_06608 [Dendroctonus ponderosae]	71	2.4e-30	348	91.5	94.4
TRINITY_DN22570_c0_g3	XP_024871166.1	uncharacterized protein LOC112454162 [Temnothorax curvispinosus]	184	7e-40	434	49.5	65.2
TRINITY_DN20815_c1_g7	XP_019761668.1	PREDICTED: inhibin beta chain [Dendroctonus ponderosae]	91	1.5e-45	478	98.9	98.9
TRINITY_DN20185_c0_g9	XP_029166729.1	craniofacial development protein 2-like [Nylanderia fulva]	154	1.1e-38	423	55.8	71.4
TRINITY_DN24837_c2_g4	VDD97763.1	unnamed protein product [Enterobius vermicularis]	49	4.9e-07	147	65.3	71.4
TRINITY_DN25156_c2_g2	RZF39012.1	hypothetical protein LSTR_LSTR014708 [Laodelphax striatella]	77	9.8e-23	283	64.9	80.5
TRINITY_DN23439_c0_g1	ERL93134.1	hypothetical protein D910_10435 [Dendroctonus ponderosae]	122	1.5e-57	587	89.3	93.4
TRINITY_DN24625_c0_g2	XP_019768825.1	PREDICTED: sister chromatid cohesion protein DCC1 [Dendroctonus ponderosae] >AEE63355.1 unknown [Dendroctonus ponderosae] >ENN71989.1 hypothetical protein YQE_11280, partial [Dendroctonus ponderosae] >ERL91326.1 hypothetical protein D910_08658 [Dendroctonus ponderosae]	361	2.8e-192	1751	93.6	97.5
TRINITY_DN14883_c0_g1	XP_008201394.1	PREDICTED: uncharacterized protein LOC103315174 isoform X1 [Tribolium castaneum] >EFA11736.2 hypothetical protein TcasGA2_TC002385 [Tribolium castaneum]	92	2e-12	194	46.7	70.7
TRINITY_DN27068_c0_g1	ERL83379.1	hypothetical protein D910_00322 [Dendroctonus ponderosae] >ERL92128.1 hypothetical protein D910_09448 [Dendroctonus ponderosae]	519	5.7e-289	2588	96.1	98.5
TRINITY_DN17105_c0_g1	XP_019759432.1	PREDICTED: heterogeneous nuclear ribonucleoprotein H-like [Dendroctonus ponderosae] >XP_019759433.1 PREDICTED: heterogeneous nuclear ribonucleoprotein H-like [Dendroctonus ponderosae]	194	6.8e-103	982	96.4	97.4
TRINITY_DN25323_c0_g2	XP_019768962.1	PREDICTED: inward rectifier potassium channel 2-like [Dendroctonus ponderosae] >ERL83393.1 hypothetical protein D910_00345 [Dendroctonus ponderosae] >ERL83897.1 hypothetical protein D910_01187 [Dendroctonus ponderosae] >ERL85701.1 hypothetical protein D910_03116 [Dendroctonus ponderosae] >ERL91386.1 hypothetical protein D910_08718 [Dendroctonus ponderosae]	389	2e-214	1943	94.9	97.7
TRINITY_DN26491_c1_g1	XP_019771676.1	PREDICTED: aminopeptidase M1-A-like isoform X2 [Dendroctonus ponderosae]	667	0	2968	84.7	91.5
TRINITY_DN25329_c0_g1	XP_019771104.1	PREDICTED: protein cramped-like isoform X1 [Dendroctonus ponderosae]	467	7.9e-247	2224	93.6	96.8
TRINITY_DN23912_c0_g1	XP_019759479.1	PREDICTED: alanine--tRNA ligase, cytoplasmic isoform X1 [Dendroctonus ponderosae]	973	0	4945	97.7	98.9
TRINITY_DN17207_c0_g1	ENN75307.1	hypothetical protein YQE_08084, partial [Dendroctonus ponderosae] >ERL89255.1 hypothetical protein D910_06628 [Dendroctonus ponderosae]	103	3.5e-43	462	89.3	93.2
TRINITY_DN23014_c0_g1	ERL86997.1	hypothetical protein D910_04400 [Dendroctonus ponderosae]	616	4e-238	2146	79.2	80.5
TRINITY_DN27117_c0_g1	XP_019754122.1	PREDICTED: protein lava lamp-like [Dendroctonus ponderosae] >XP_019754123.1 PREDICTED: protein lava lamp-like [Dendroctonus ponderosae]	3301	0	10068	82.3	85.8
TRINITY_DN19016_c0_g1	KDR08794.1	Transient receptor potential cation channel subfamily A member 1 [Zootermopsis nevadensis]	113	1.2e-52	540	87.6	94.7
TRINITY_DN21495_c0_g3	XP_019766862.1	PREDICTED: phosphatidylinositol 3,4,5-trisphosphate 3-phosphatase and dual-specificity protein phosphatase PTEN isoform X4 [Dendroctonus ponderosae] >XP_019766863.1 PREDICTED: phosphatidylinositol 3,4,5-trisphosphate 3-phosphatase and dual-specificity protein phosphatase PTEN isoform X4 [Dendroctonus ponderosae]	457	8.5e-252	2266	96.7	97.6
TRINITY_DN27536_c2_g3	RUS74240.1	hypothetical protein EGW08_018008 [Elysia chlorotica]	66	4.7e-13	197	53	75.8
TRINITY_DN18415_c0_g1	XP_019771629.1	PREDICTED: uncharacterized protein LOC109545403 [Dendroctonus ponderosae]	378	7.1e-196	1780	88.1	91
TRINITY_DN21039_c0_g1	XP_019754321.1	PREDICTED: AN1-type zinc finger protein 6 isoform X2 [Dendroctonus ponderosae] >XP_019754322.1 PREDICTED: AN1-type zinc finger protein 6 isoform X2 [Dendroctonus ponderosae] >ENN80628.1 hypothetical protein YQE_02949, partial [Dendroctonus ponderosae]	61	1.3e-28	342	100	100
TRINITY_DN23817_c0_g5	ENN75974.1	hypothetical protein YQE_07508, partial [Dendroctonus ponderosae]	169	9e-55	563	67.5	73.4
TRINITY_DN26254_c0_g4	XP_003730216.1	PREDICTED: RNA-directed DNA polymerase from mobile element jockey-like [Strongylocentrotus purpuratus]	121	1.5e-20	264	48.8	62
TRINITY_DN27435_c2_g2	AJG05484.1	relish [Sitophilus oryzae]	899	1.2e-266	2395	56.1	72.6
TRINITY_DN10805_c0_g1	XP_019770013.1	PREDICTED: uncharacterized protein LOC109544339 [Dendroctonus ponderosae]	457	9.8e-234	2107	91.7	94.3
TRINITY_DN15755_c0_g1	VDL79724.1	unnamed protein product [Nippostrongylus brasiliensis]	94	5.5e-15	217	43.6	59.6
TRINITY_DN21924_c0_g3	AAH10602.1	H2-gs10 protein [Mus musculus]	71	5.2e-30	343	90.1	93
TRINITY_DN24494_c2_g1	ERL88663.1	hypothetical protein D910_06047, partial [Dendroctonus ponderosae]	75	3.2e-14	214	69.3	76
TRINITY_DN27111_c0_g2	ERL86841.1	hypothetical protein D910_04244 [Dendroctonus ponderosae]	706	3.5e-281	2519	91.8	93.5
TRINITY_DN20884_c0_g1	XP_019753954.1	PREDICTED: uncharacterized protein LOC109533145 [Dendroctonus ponderosae] >XP_019753955.1 PREDICTED: uncharacterized protein LOC109533145 [Dendroctonus ponderosae]	439	3.2e-240	2164	94.8	97.5
TRINITY_DN21710_c2_g2	ERL94075.1	hypothetical protein D910_11357 [Dendroctonus ponderosae]	43	1.5e-10	180	76.7	90.7
TRINITY_DN14939_c0_g1	XP_028133299.1	uncharacterized protein LOC114328609, partial [Diabrotica virgifera virgifera]	70	5.3e-11	182	45.7	67.1
TRINITY_DN24781_c0_g1	XP_019767798.1	PREDICTED: serine/threonine-protein kinase GD17699 [Dendroctonus ponderosae] >ENN72680.1 hypothetical protein YQE_10777, partial [Dendroctonus ponderosae]	574	0	2929	99.1	99.3
TRINITY_DN18274_c0_g2	XP_019759428.1	PREDICTED: LOW QUALITY PROTEIN: protein CBFA2T1-like [Dendroctonus ponderosae]	101	2.3e-48	504	98	100
TRINITY_DN21694_c0_g1	XP_019759395.1	PREDICTED: uncharacterized protein LOC109537221 isoform X1 [Dendroctonus ponderosae]	65	1.3e-23	295	83.1	86.2
TRINITY_DN25985_c0_g2	XP_019762912.1	PREDICTED: DEP domain-containing protein 5 isoform X2 [Dendroctonus ponderosae]	1346	0	4522	70.4	71.3
TRINITY_DN27370_c2_g4	PZC76544.1	hypothetical protein B5X24_HaOG204443 [Helicoverpa armigera]	72	3.8e-15	215	52.8	73.6
TRINITY_DN12659_c0_g2	CAI64495.1	Heat shock protein HSP 90-alpha 2 [Homo sapiens] >BAG51711.1 unnamed protein product [Homo sapiens]	156	8.2e-81	784	100	100
TRINITY_DN22328_c0_g1	ENN80036.1	hypothetical protein YQE_03513, partial [Dendroctonus ponderosae]	318	3.1e-177	1623	94.3	95.6
TRINITY_DN27361_c1_g1	ERL93099.1	hypothetical protein D910_10401 [Dendroctonus ponderosae]	69	6.9e-08	153	53.6	66.7
TRINITY_DN25753_c3_g2	XP_019769263.1	PREDICTED: sodium/potassium-transporting ATPase subunit alpha isoform X7 [Dendroctonus ponderosae]	32	1.9e-08	162	100	100
TRINITY_DN22846_c0_g1	XP_019765142.1	PREDICTED: uncharacterized protein LOC109540976 [Dendroctonus ponderosae] >XP_019765143.1 PREDICTED: uncharacterized protein LOC109540976 [Dendroctonus ponderosae]	560	4e-298	2666	96.4	97.5
TRINITY_DN24579_c2_g2	XP_019755657.1	PREDICTED: beta-1,3-glucan-binding protein-like isoform X1 [Dendroctonus ponderosae] >XP_019768160.1 PREDICTED: beta-1,3-glucan-binding protein-like [Dendroctonus ponderosae] >ENN72429.1 hypothetical protein YQE_10920, partial [Dendroctonus ponderosae] >ENN83276.1 hypothetical protein YQE_00367, partial [Dendroctonus ponderosae] >ERL83344.1 hypothetical protein D910_00244 [Dendroctonus ponderosae…	79	4.3e-36	403	88.6	94.9
TRINITY_DN26596_c3_g2	ENN71336.1	hypothetical protein YQE_11951, partial [Dendroctonus ponderosae]	189	2.3e-92	887	100	100
TRINITY_DN26373_c0_g5	RXG51444.1	Transmembrane protein [Armadillidium vulgare]	67	1.1e-10	180	59.7	68.7
TRINITY_DN21304_c0_g5	XP_019758422.1	PREDICTED: uncharacterized protein LOC109536585 isoform X2 [Dendroctonus ponderosae]	38	8.5e-15	216	97.4	97.4
TRINITY_DN18465_c0_g1	XP_010753255.1	40S ribosomal protein SA [Larimichthys crocea] >TMS14786.1 hypothetical protein E3U43_021248 [Larimichthys crocea]	275	2.5e-155	1429	100	100
TRINITY_DN33568_c0_g1	XP_028138491.1	uncharacterized protein LOC114332904 [Diabrotica virgifera virgifera]	82	1.1e-12	195	52.4	61
TRINITY_DN25422_c0_g2	XP_019769529.1	PREDICTED: CXXC-type zinc finger protein 1 isoform X1 [Dendroctonus ponderosae]	507	6.2e-278	2489	97.2	97.8
TRINITY_DN20254_c0_g1	XP_016664841.1	PREDICTED: zinc finger BED domain-containing protein 1-like, partial [Acyrthosiphon pisum]	56	1.7e-07	152	51.8	69.6
TRINITY_DN21388_c0_g1	XP_019769087.1	PREDICTED: putative oxidoreductase GLYR1 homolog [Dendroctonus ponderosae]	484	4.7e-230	2077	87.2	88.4
TRINITY_DN26314_c0_g1	XP_019770656.1	PREDICTED: mediator of RNA polymerase II transcription subunit 27 [Dendroctonus ponderosae] >AEE61910.1 unknown [Dendroctonus ponderosae] >ENN71023.1 hypothetical protein YQE_12422, partial [Dendroctonus ponderosae] >ERL88383.1 hypothetical protein D910_05769 [Dendroctonus ponderosae]	295	5.7e-165	1514	98.3	99.3
TRINITY_DN24138_c0_g1	ENN79915.1	hypothetical protein YQE_03734, partial [Dendroctonus ponderosae] >ERL84362.1 hypothetical protein D910_01787 [Dendroctonus ponderosae] >ERL88876.1 hypothetical protein D910_06258 [Dendroctonus ponderosae]	287	6.8e-164	1506	98.6	100
TRINITY_DN18952_c0_g2	ERL86293.1	hypothetical protein D910_03701 [Dendroctonus ponderosae]	89	1.2e-40	437	96.6	97.8
TRINITY_DN26185_c0_g1	XP_019765314.1	PREDICTED: muscle calcium channel subunit alpha-1 isoform X2 [Dendroctonus ponderosae]	946	0	4273	88.9	89.4
TRINITY_DN24224_c2_g4	XP_002425201.1	zinc finger protein, putative [Pediculus humanus corporis] >EEB12463.1 zinc finger protein, putative [Pediculus humanus corporis]	154	8.8e-18	244	34.4	48.7
TRINITY_DN21593_c0_g3	ENN73058.1	hypothetical protein YQE_10328, partial [Dendroctonus ponderosae]	97	4.5e-09	165	43.3	57.7
TRINITY_DN24759_c0_g3	XP_019767112.1	PREDICTED: transport and Golgi organization protein 1-like, partial [Dendroctonus ponderosae]	912	8e-171	1569	65.9	69
TRINITY_DN26162_c0_g4	ENN72715.1	hypothetical protein YQE_10653, partial [Dendroctonus ponderosae]	85	7.2e-39	420	91.8	97.6
TRINITY_DN21683_c1_g12	XP_019767154.1	PREDICTED: GATA-binding factor 5-B-like isoform X1 [Dendroctonus ponderosae]	362	5.2e-199	1808	96.1	97
TRINITY_DN23241_c0_g3	XP_022908373.1	COP9 signalosome complex subunit 1 [Onthophagus taurus]	112	4.9e-22	277	49.1	69.6
TRINITY_DN24435_c1_g6	ENN82732.1	hypothetical protein YQE_00900, partial [Dendroctonus ponderosae]	54	1.1e-21	275	98.1	98.1
TRINITY_DN23753_c1_g3	XP_019753383.1	PREDICTED: homeotic protein proboscipedia-like isoform X1 [Dendroctonus ponderosae]	611	2.9e-274	2459	84.1	84.9
TRINITY_DN20044_c0_g4	XP_019772589.1	PREDICTED: aryl hydrocarbon receptor protein 1 isoform X2 [Dendroctonus ponderosae]	139	6.9e-71	700	99.3	99.3
TRINITY_DN23648_c0_g1	XP_019772471.1	PREDICTED: zinc finger protein Xfin-like isoform X1 [Dendroctonus ponderosae] >XP_019772935.1 PREDICTED: zinc finger protein Xfin-like isoform X1 [Dendroctonus ponderosae]	787	1.7e-276	2478	84.2	87.3
TRINITY_DN25302_c0_g7	ERL90350.1	hypothetical protein D910_07699 [Dendroctonus ponderosae]	1038	8e-296	2646	57.2	59.1
TRINITY_DN23301_c0_g1	XP_019771691.1	PREDICTED: equilibrative nucleoside transporter 3-like [Dendroctonus ponderosae] >XP_019771692.1 PREDICTED: equilibrative nucleoside transporter 3-like [Dendroctonus ponderosae] >XP_019771693.1 PREDICTED: equilibrative nucleoside transporter 3-like [Dendroctonus ponderosae] >XP_019771694.1 PREDICTED: equilibrative nucleoside transporter 3-like [Dendroctonus ponderosae] >ENN70394.1 hypothetical pr…	448	1.5e-223	2021	92.9	94
TRINITY_DN27371_c1_g2	XP_019763935.1	PREDICTED: uncharacterized protein LOC109540156 [Dendroctonus ponderosae]	248	5.8e-90	869	70.2	75.8
TRINITY_DN22654_c0_g1	ERL89985.1	hypothetical protein D910_07344 [Dendroctonus ponderosae]	1263	3.7e-285	2556	63.3	66.2
TRINITY_DN21609_c0_g1	XP_019756395.1	PREDICTED: calcitonin gene-related peptide type 1 receptor-like isoform X2 [Dendroctonus ponderosae] >ENN79336.1 hypothetical protein YQE_04245, partial [Dendroctonus ponderosae] >ERL86423.1 hypothetical protein D910_03830 [Dendroctonus ponderosae]	354	5.9e-185	1687	90.1	95.5
TRINITY_DN24106_c0_g1	XP_019770480.1	PREDICTED: uncharacterized protein LOC109544620 isoform X1 [Dendroctonus ponderosae]	292	4.3e-168	1542	100	100
TRINITY_DN24225_c0_g1	XP_019754144.1	PREDICTED: uncharacterized protein LOC109533299, partial [Dendroctonus ponderosae]	405	3.3e-226	2044	95.1	97.3
TRINITY_DN26359_c1_g1	XP_015840131.1	PREDICTED: uncharacterized protein LOC103314336 [Tribolium castaneum]	184	4.8e-46	487	47.3	67.4
TRINITY_DN24025_c2_g1	NP_001134061.1	Photosystem II 10 kDa polypeptide, chloroplast [Salmo salar] >ACI66087.1 Photosystem II 10 kDa polypeptide, chloroplast precursor [Salmo salar]	141	7.1e-36	397	63.8	76.6
TRINITY_DN8676_c0_g1	XP_019770619.1	PREDICTED: uncharacterized protein LOC109544743 [Dendroctonus ponderosae]	84	3.3e-36	397	94	98.8
TRINITY_DN21150_c1_g1	XP_019765754.1	PREDICTED: tRNA-splicing endonuclease subunit Sen34 [Dendroctonus ponderosae]	255	6.4e-126	1179	90.6	96.1
TRINITY_DN26520_c0_g2	XP_019755341.1	PREDICTED: PH and SEC7 domain-containing protein 1 isoform X4 [Dendroctonus ponderosae]	47	1.9e-16	231	95.7	100
TRINITY_DN18913_c0_g1	XP_019771427.1	PREDICTED: sentrin-specific protease 8-like [Dendroctonus ponderosae] >XP_019771428.1 PREDICTED: sentrin-specific protease 8-like [Dendroctonus ponderosae] >AEE62319.1 unknown [Dendroctonus ponderosae]	221	2.8e-118	1110	93.2	95.5
TRINITY_DN21437_c0_g1	XP_019760312.1	PREDICTED: tyrosine--tRNA ligase, mitochondrial isoform X1 [Dendroctonus ponderosae] >ENN76915.1 hypothetical protein YQE_06562, partial [Dendroctonus ponderosae] >ERL84399.1 hypothetical protein D910_01832 [Dendroctonus ponderosae]	514	7e-249	2238	85.2	87.4
TRINITY_DN21623_c0_g4	XP_019770082.1	PREDICTED: E3 ubiquitin-protein ligase Bre1 [Dendroctonus ponderosae]	567	1.8e-189	1727	91.7	92.2
TRINITY_DN19880_c0_g1	ENN79172.1	hypothetical protein YQE_04356, partial [Dendroctonus ponderosae] >ERL86283.1 hypothetical protein D910_03692 [Dendroctonus ponderosae]	317	5.1e-186	1694	99.7	99.7
TRINITY_DN26168_c2_g1	XP_019766121.1	PREDICTED: peptide-N(4)-(N-acetyl-beta-glucosaminyl)asparagine amidase isoform X1 [Dendroctonus ponderosae]	681	7.7e-301	2690	76.9	82.8
TRINITY_DN19894_c4_g1	XP_011878666.1	PREDICTED: uncharacterized protein LOC105567969 [Vollenhovia emeryi]	48	7e-09	163	60.4	68.8
TRINITY_DN23706_c1_g2	XP_019755306.1	PREDICTED: uncharacterized protein LOC109534174 [Dendroctonus ponderosae]	579	1.1e-306	2737	92.6	96.2
TRINITY_DN23033_c0_g1	XP_019756946.1	PREDICTED: uncharacterized protein LOC109535470 [Dendroctonus ponderosae]	453	7.5e-252	2266	91.8	93.6
TRINITY_DN17910_c0_g1	XP_028154641.1	uncharacterized protein LOC114348233 [Diabrotica virgifera virgifera]	109	3.4e-19	255	47.7	67.9
TRINITY_DN23760_c0_g1	XP_019759647.1	PREDICTED: polyhomeotic-proximal chromatin protein-like isoform X1 [Dendroctonus ponderosae]	894	0	3970	94.5	96.3
TRINITY_DN25837_c0_g8	XP_019757558.1	PREDICTED: uncharacterized protein LOC109535952 isoform X3 [Dendroctonus ponderosae]	164	2.1e-64	644	82.9	87.8
TRINITY_DN27747_c4_g2	XP_019766950.1	PREDICTED: uncharacterized protein LOC109542247 isoform X2 [Dendroctonus ponderosae] >ENN73173.1 hypothetical protein YQE_10228, partial [Dendroctonus ponderosae]	45	4.1e-11	189	86.7	91.1
TRINITY_DN21902_c2_g4	XP_018573357.1	gamma-tubulin complex component 2-like isoform X2 [Anoplophora glabripennis]	813	0	2799	67.8	80.9
TRINITY_DN18071_c0_g1	XP_019753338.1	PREDICTED: thioredoxin-like protein 1 [Dendroctonus ponderosae] >ENN81249.1 hypothetical protein YQE_02343, partial [Dendroctonus ponderosae]	204	8.2e-106	1003	94.1	97.1
TRINITY_DN25810_c1_g1	XP_019758887.1	PREDICTED: uncharacterized protein LOC109536882 [Dendroctonus ponderosae]	173	2.1e-29	345	46.8	53.8
TRINITY_DN19558_c0_g1	XP_019754066.1	PREDICTED: acetylcholine receptor subunit alpha-like [Dendroctonus ponderosae]	677	8.6e-175	1600	55.4	61.9
TRINITY_DN24004_c0_g1	ENN80193.1	hypothetical protein YQE_03388, partial [Dendroctonus ponderosae]	448	1.5e-234	2117	97.8	98.7
TRINITY_DN27427_c2_g2	ERL91964.1	hypothetical protein D910_09287 [Dendroctonus ponderosae]	172	7.5e-35	388	73.8	80.8
TRINITY_DN25226_c0_g1	ENN76713.1	hypothetical protein YQE_06778, partial [Dendroctonus ponderosae]	286	1.2e-154	1428	97.6	98.3
TRINITY_DN19789_c1_g2	ENN72881.1	hypothetical protein YQE_10451, partial [Dendroctonus ponderosae]	36	2.2e-08	158	83.3	88.9
TRINITY_DN22453_c0_g6	ENN80128.1	hypothetical protein YQE_03436, partial [Dendroctonus ponderosae]	83	1.8e-40	436	97.6	97.6
TRINITY_DN16977_c0_g1	EFA13680.1	hypothetical protein TcasGA2_TC004211 [Tribolium castaneum]	106	7.4e-14	205	43.4	60.4
TRINITY_DN25248_c0_g3	ENN70577.1	hypothetical protein YQE_12752, partial [Dendroctonus ponderosae]	531	3.3e-290	2595	94	97.9
TRINITY_DN22240_c0_g3	AEE63081.1	unknown [Dendroctonus ponderosae] >ERL88194.1 hypothetical protein D910_05582 [Dendroctonus ponderosae]	283	6e-153	1413	96.8	98.6
TRINITY_DN26055_c0_g3	ENN80884.1	hypothetical protein YQE_02673, partial [Dendroctonus ponderosae]	71	5.9e-34	377	97.2	98.6
TRINITY_DN27049_c0_g1	XP_019761571.1	PREDICTED: aromatic-L-amino-acid decarboxylase isoform X1 [Dendroctonus ponderosae]	479	2.8e-276	2475	97.5	99
TRINITY_DN23982_c2_g1	AEE62366.1	unknown [Dendroctonus ponderosae]	579	5.1e-295	2637	90.8	92.9
TRINITY_DN25190_c0_g1	XP_018575544.1	ATP-binding cassette sub-family A member 3-like isoform X1 [Anoplophora glabripennis]	1915	0	5150	57.1	69.2
TRINITY_DN22253_c0_g3	ENN75441.1	hypothetical protein YQE_07992, partial [Dendroctonus ponderosae]	298	7.7e-156	1437	95	96.6
TRINITY_DN22385_c1_g2	XP_019769928.1	PREDICTED: solute carrier family 2, facilitated glucose transporter member 8-like [Dendroctonus ponderosae] >XP_019769929.1 PREDICTED: solute carrier family 2, facilitated glucose transporter member 8-like [Dendroctonus ponderosae] >XP_019769930.1 PREDICTED: solute carrier family 2, facilitated glucose transporter member 8-like [Dendroctonus ponderosae] >XP_019769931.1 PREDICTED: solute carrier f…	521	4.5e-266	2388	92.7	96.2
TRINITY_DN23469_c0_g6	ENN76698.1	hypothetical protein YQE_06763, partial [Dendroctonus ponderosae]	42	4.7e-08	154	71.4	85.7
TRINITY_DN17299_c0_g1	XP_019754747.1	PREDICTED: LOW QUALITY PROTEIN: gamma-aminobutyric acid receptor subunit beta-like [Dendroctonus ponderosae]	341	5.9e-163	1497	90	91.5
TRINITY_DN10279_c0_g1	ERL86097.1	hypothetical protein D910_03511 [Dendroctonus ponderosae]	133	1.6e-69	686	98.5	99.2
TRINITY_DN24719_c0_g2	XP_019763008.1	PREDICTED: RING finger protein 10-like [Dendroctonus ponderosae]	656	0	3040	92.4	94.7
TRINITY_DN7190_c0_g1	XP_019765549.1	PREDICTED: uncharacterized protein LOC109541206 [Dendroctonus ponderosae]	80	8.1e-32	359	91.2	93.8
TRINITY_DN22769_c0_g1	XP_019758642.1	PREDICTED: uncharacterized protein LOC109536736 [Dendroctonus ponderosae]	253	4.8e-137	1275	98	98
TRINITY_DN13702_c0_g1	XP_024266901.1	glutathione S-transferase 3-like [Oncorhynchus tshawytscha]	75	5.4e-08	155	42.7	62.7
TRINITY_DN20520_c0_g6	XP_022908431.1	uncharacterized protein LOC111419767 [Onthophagus taurus] >XP_022905467.1 uncharacterized protein LOC111417429 [Onthophagus taurus] >XP_022905468.1 uncharacterized protein LOC111417430 [Onthophagus taurus] >XP_022912205.1 uncharacterized protein LOC111423190 [Onthophagus taurus] >XP_022913494.1 uncharacterized protein LOC111424242 [Onthophagus taurus]	119	1.2e-29	342	52.1	73.1
TRINITY_DN23469_c0_g2	ENN76698.1	hypothetical protein YQE_06763, partial [Dendroctonus ponderosae]	146	1.8e-34	386	83.6	89.7
TRINITY_DN15327_c0_g1	XP_019766178.1	PREDICTED: predicted GPI-anchored protein 58 [Dendroctonus ponderosae]	46	1.4e-12	195	97.8	100
TRINITY_DN11680_c0_g2	ENN77526.1	hypothetical protein YQE_05974, partial [Dendroctonus ponderosae] >ERL94866.1 hypothetical protein D910_12139 [Dendroctonus ponderosae]	88	1.3e-38	418	97.7	100
TRINITY_DN24752_c1_g2	ENN74781.1	hypothetical protein YQE_08554, partial [Dendroctonus ponderosae]	55	5.6e-19	257	89.1	98.2
TRINITY_DN27203_c1_g3	ERL94284.1	hypothetical protein D910_11565 [Dendroctonus ponderosae]	79	9.7e-35	385	87.3	94.9
TRINITY_DN20492_c0_g5	XP_023310159.1	uncharacterized protein LOC111691477 [Anoplophora glabripennis]	167	5.2e-33	372	43.1	64.1
TRINITY_DN25953_c0_g2	XP_019767608.1	PREDICTED: protein tamozhennic [Dendroctonus ponderosae]	70	5.9e-17	236	97.1	98.6
TRINITY_DN21613_c0_g5	VDK21398.1	unnamed protein product [Anisakis simplex]	64	1.7e-15	221	71.9	71.9
TRINITY_DN12804_c0_g2	ENN70238.1	hypothetical protein YQE_13022, partial [Dendroctonus ponderosae]	37	2.3e-11	183	100	100
TRINITY_DN22409_c1_g4	XP_019755866.1	PREDICTED: uncharacterized protein LOC109534589 [Dendroctonus ponderosae] >XP_019755867.1 PREDICTED: uncharacterized protein LOC109534589 [Dendroctonus ponderosae]	31	8.8e-06	137	80.6	96.8
TRINITY_DN25425_c0_g2	XP_019758462.1	PREDICTED: uncharacterized protein LOC109536617 [Dendroctonus ponderosae]	519	7.6e-278	2489	88.6	92.9
TRINITY_DN24942_c0_g1	ENN72141.1	hypothetical protein YQE_11199, partial [Dendroctonus ponderosae]	351	1.8e-137	1279	72.9	75.8
TRINITY_DN21800_c1_g2	XP_029162270.1	craniofacial development protein 2-like [Nylanderia fulva]	98	6.9e-39	421	73.5	87.8
TRINITY_DN12896_c0_g1	XP_019758571.1	PREDICTED: regulator of microtubule dynamics protein 1-like [Dendroctonus ponderosae] >ENN77954.1 hypothetical protein YQE_05631, partial [Dendroctonus ponderosae] >ERL85937.1 hypothetical protein D910_03352 [Dendroctonus ponderosae]	107	1.7e-56	573	93.5	97.2
TRINITY_DN21953_c0_g1	ENN81022.1	hypothetical protein YQE_02565, partial [Dendroctonus ponderosae]	253	1.9e-82	802	81.4	82.6
TRINITY_DN12046_c0_g1	XP_019771151.1	PREDICTED: homeobox protein goosecoid [Dendroctonus ponderosae]	96	5e-45	474	94.8	94.8
TRINITY_DN22111_c2_g1	XP_019769120.1	PREDICTED: transmembrane and TPR repeat-containing protein 1-like isoform X1 [Dendroctonus ponderosae] >XP_019769121.1 PREDICTED: transmembrane and TPR repeat-containing protein 1-like isoform X1 [Dendroctonus ponderosae] >XP_019769122.1 PREDICTED: transmembrane and TPR repeat-containing protein 1-like isoform X1 [Dendroctonus ponderosae] >XP_019769123.1 PREDICTED: transmembrane and TPR repeat-co…	757	0	3478	95.9	97.2
TRINITY_DN25277_c0_g3	ENN78132.1	hypothetical protein YQE_05286, partial [Dendroctonus ponderosae]	523	1.1e-146	1358	73.8	74
TRINITY_DN26847_c0_g2	XP_019772622.1	PREDICTED: fatty-acid amide hydrolase 2-like isoform X2 [Dendroctonus ponderosae] >ENN82006.1 hypothetical protein YQE_01581, partial [Dendroctonus ponderosae]	344	1.2e-168	1548	88.7	94.2
TRINITY_DN22861_c1_g6	XP_019773647.1	PREDICTED: uncharacterized protein LOC109546914 [Dendroctonus ponderosae]	170	6.6e-66	657	78.8	83.5
TRINITY_DN20283_c0_g1	ENN79959.1	hypothetical protein YQE_03606, partial [Dendroctonus ponderosae]	142	2.3e-64	647	86.6	89.4
TRINITY_DN23248_c0_g1	XP_019764636.1	PREDICTED: TIMELESS-interacting protein [Dendroctonus ponderosae] >ENN74520.1 hypothetical protein YQE_08844, partial [Dendroctonus ponderosae]	469	5.9e-203	1843	88.3	92.1
TRINITY_DN21727_c1_g3	XP_019762719.1	PREDICTED: U3 small nucleolar RNA-associated protein 14 homolog A [Dendroctonus ponderosae] >ENN75593.1 hypothetical protein YQE_07859, partial [Dendroctonus ponderosae] >ERL91908.1 hypothetical protein D910_09231 [Dendroctonus ponderosae]	369	1.3e-178	1631	92.4	94.9
TRINITY_DN33619_c0_g1	ENN78663.1	hypothetical protein YQE_04835, partial [Dendroctonus ponderosae]	61	3.1e-24	294	96.7	98.4
TRINITY_DN22459_c0_g2	XP_019767183.1	PREDICTED: transmembrane protein 43 homolog [Dendroctonus ponderosae] >ENN73019.1 hypothetical protein YQE_10354, partial [Dendroctonus ponderosae] >ERL88714.1 hypothetical protein D910_06096 [Dendroctonus ponderosae]	370	2.8e-197	1793	89.7	95.9
TRINITY_DN26715_c0_g1	XP_019773309.1	PREDICTED: proline-rich extensin-like protein EPR1 [Dendroctonus ponderosae]	1001	0	4418	93.7	95.9
TRINITY_DN25272_c1_g2	RVE43981.1	hypothetical protein evm_011365 [Chilo suppressalis]	342	5.5e-73	720	42.1	63.2
TRINITY_DN16092_c0_g1	XP_019769164.1	PREDICTED: calcium release-activated calcium channel protein 1-like isoform X2 [Dendroctonus ponderosae] >ENN71865.1 hypothetical protein YQE_11480, partial [Dendroctonus ponderosae]	30	6.2e-07	144	83.3	90
TRINITY_DN24126_c1_g3	XP_019756301.1	PREDICTED: centrosomal protein of 97 kDa [Dendroctonus ponderosae]	553	2.9e-261	2347	88.2	90.1
TRINITY_DN13188_c0_g1	XP_028144366.1	armadillo repeat-containing protein 3 isoform X1 [Diabrotica virgifera virgifera]	165	1.3e-48	507	54.5	75.2
TRINITY_DN25085_c0_g4	XP_019763025.1	PREDICTED: polypyrimidine tract-binding protein 2 isoform X6 [Dendroctonus ponderosae] >XP_019763027.1 PREDICTED: polypyrimidine tract-binding protein 2 isoform X7 [Dendroctonus ponderosae]	581	0	2888	100	100
TRINITY_DN24805_c0_g1	ENN73876.1	hypothetical protein YQE_09530, partial [Dendroctonus ponderosae]	41	2.8e-10	178	87.8	92.7
TRINITY_DN23769_c7_g1	XP_019766366.1	PREDICTED: aryl hydrocarbon receptor nuclear translocator-like protein 1 [Dendroctonus ponderosae]	74	2.1e-35	397	94.6	97.3
TRINITY_DN23424_c1_g1	XP_019773032.1	PREDICTED: uncharacterized protein LOC109546495 [Dendroctonus ponderosae] >ENN81736.1 hypothetical protein YQE_01875, partial [Dendroctonus ponderosae] >ERL91422.1 hypothetical protein D910_08754 [Dendroctonus ponderosae]	95	4.1e-45	476	94.7	96.8
TRINITY_DN24163_c0_g1	XP_019769432.1	PREDICTED: 40S ribosomal protein S23 [Dendroctonus ponderosae] >CAH04343.1 S23e ribosomal protein [Biphyllus lunatus] >AEE61593.1 unknown [Dendroctonus ponderosae] >ENN71689.1 hypothetical protein YQE_11612, partial [Dendroctonus ponderosae] >ERL87232.1 hypothetical protein D910_04630 [Dendroctonus ponderosae]	121	3.9e-65	652	100	100
TRINITY_DN19817_c3_g11	ADW77527.1	14-3-3 [Ditylenchus destructor]	251	4.3e-131	1223	97.2	98.4
TRINITY_DN26484_c2_g6	XP_008549021.2	PREDICTED: uncharacterized protein LOC103572275 [Microplitis demolitor]	62	6.8e-19	248	74.2	85.5
TRINITY_DN19914_c0_g1	KYB25865.1	hypothetical protein TcasGA2_TC015233 [Tribolium castaneum]	58	2.3e-12	198	69	84.5
TRINITY_DN10134_c0_g1	XP_019767308.1	PREDICTED: tachykinin-like peptides receptor 86C [Dendroctonus ponderosae]	75	2.4e-33	372	92	98.7
TRINITY_DN19891_c0_g1	XP_019754476.1	PREDICTED: protein asteroid-like isoform X1 [Dendroctonus ponderosae]	743	0	3513	91.7	94.9
TRINITY_DN19000_c0_g1	XP_019764241.1	PREDICTED: lipase 3-like [Dendroctonus ponderosae]	99	4.5e-50	524	96	99
TRINITY_DN16241_c0_g1	ENN73799.1	hypothetical protein YQE_09577, partial [Dendroctonus ponderosae]	109	3.9e-45	475	82.6	90.8
TRINITY_DN21035_c0_g1	ENN72035.1	hypothetical protein YQE_11323, partial [Dendroctonus ponderosae]	168	1.7e-48	507	81	83.9
TRINITY_DN24242_c1_g1	XP_019770099.1	PREDICTED: SWI/SNF nucleosome remodeling complex component [Dendroctonus ponderosae]	1466	0	5059	82.6	83.6
TRINITY_DN30759_c0_g1	XP_019766470.1	PREDICTED: trissin [Dendroctonus ponderosae] >ENN73449.1 hypothetical protein YQE_09946, partial [Dendroctonus ponderosae]	84	6.3e-43	455	100	100
TRINITY_DN18665_c0_g1	XP_019756741.1	PREDICTED: 60S ribosomal protein L24-like [Dendroctonus ponderosae] >AEE63372.1 unknown [Dendroctonus ponderosae] >ERL86505.1 hypothetical protein D910_03909 [Dendroctonus ponderosae]	109	4.6e-54	555	99.1	99.1
TRINITY_DN23240_c0_g5	XP_019770086.1	PREDICTED: zinc finger protein 33A-like [Dendroctonus ponderosae] >ENN71342.1 hypothetical protein YQE_11957, partial [Dendroctonus ponderosae]	538	4.6e-193	1758	84.6	86.6
TRINITY_DN25968_c0_g2	XP_019761844.1	PREDICTED: adenylyl cyclase-associated protein 1-like [Dendroctonus ponderosae] >AEE61951.1 unknown [Dendroctonus ponderosae] >ENN76015.1 hypothetical protein YQE_07393, partial [Dendroctonus ponderosae] >ERL90760.1 hypothetical protein D910_08107 [Dendroctonus ponderosae]	415	5.9e-182	1664	95.4	97.1
TRINITY_DN25969_c0_g1	XP_019760299.1	PREDICTED: dual 3',5'-cyclic-AMP and -GMP phosphodiesterase 11-like isoform X1 [Dendroctonus ponderosae]	948	0	4841	98.7	99.1
TRINITY_DN21747_c1_g6	ERL94136.1	hypothetical protein D910_11418 [Dendroctonus ponderosae]	34	3.8e-07	153	79.4	94.1
TRINITY_DN19353_c0_g1	XP_019770966.1	PREDICTED: STE20-like serine/threonine-protein kinase [Dendroctonus ponderosae]	394	2.3e-146	1353	76.6	83.5
TRINITY_DN21174_c0_g1	XP_019762821.1	PREDICTED: soma ferritin-like [Dendroctonus ponderosae]	330	1.2e-78	768	53	59.4
TRINITY_DN23554_c0_g1	XP_019758417.1	PREDICTED: dipeptidyl peptidase 9 [Dendroctonus ponderosae]	568	2.1e-259	2332	79.8	80.6
TRINITY_DN18978_c0_g1	XP_019758550.1	PREDICTED: uncharacterized protein LOC109536676 [Dendroctonus ponderosae]	335	8.6e-126	1176	66	74.6
TRINITY_DN25034_c0_g1	ENN70227.1	hypothetical protein YQE_13013, partial [Dendroctonus ponderosae]	432	2.8e-235	2122	90.5	92.8
TRINITY_DN21738_c2_g1	XP_019757931.1	PREDICTED: cyclin-dependent kinase 20-like [Dendroctonus ponderosae]	218	2.4e-111	1052	90.4	93.1
TRINITY_DN21899_c0_g2	XP_019766299.1	PREDICTED: trafficking protein particle complex subunit 12-like isoform X2 [Dendroctonus ponderosae]	317	5.8e-178	1625	99.1	99.7
TRINITY_DN28582_c0_g1	EZA51768.1	Homeobox protein SIX6 [Ooceraea biroi]	207	6.2e-69	689	66.2	78.7
TRINITY_DN23218_c2_g8	ERL88619.1	hypothetical protein D910_06004 [Dendroctonus ponderosae]	232	3.7e-65	652	61.6	68.1
TRINITY_DN27293_c1_g3	ENN74642.1	hypothetical protein YQE_08761, partial [Dendroctonus ponderosae] >ERL92309.1 hypothetical protein D910_09626 [Dendroctonus ponderosae]	52	2.8e-20	261	100	100
TRINITY_DN18708_c0_g1	XP_019771239.1	PREDICTED: ITG-like peptide isoform X2 [Dendroctonus ponderosae] >ENN70639.1 hypothetical protein YQE_12584, partial [Dendroctonus ponderosae] >ERL85038.1 hypothetical protein D910_02461 [Dendroctonus ponderosae]	215	6.2e-119	1118	94	95.3
TRINITY_DN26049_c2_g2	ERL90198.1	hypothetical protein D910_07552 [Dendroctonus ponderosae]	279	1.6e-161	1484	99.6	100
TRINITY_DN27157_c0_g2	XP_019764054.1	PREDICTED: uncharacterized protein LOC109540224 isoform X1 [Dendroctonus ponderosae]	78	2e-37	409	97.4	97.4
TRINITY_DN20013_c0_g1	ERL84573.1	hypothetical protein D910_02002 [Dendroctonus ponderosae]	361	2.6e-182	1664	86.4	90.6
TRINITY_DN26633_c0_g4	OXA37846.1	Transposable element Tcb1 transposase [Folsomia candida]	81	2e-12	192	48.1	61.7
TRINITY_DN23637_c0_g1	ENN77069.1	hypothetical protein YQE_06404, partial [Dendroctonus ponderosae]	114	2.1e-15	225	43.9	61.4
TRINITY_DN15301_c0_g2	XP_023214908.1	uncharacterized protein LOC111617829 [Centruroides sculpturatus]	85	1.4e-22	280	58.8	75.3
TRINITY_DN23136_c0_g2	XP_019753581.1	PREDICTED: chromodomain-helicase-DNA-binding protein 1 isoform X2 [Dendroctonus ponderosae]	1532	0	6742	95.3	97
TRINITY_DN15730_c0_g1	XP_019762444.1	PREDICTED: tryptase beta-2-like [Dendroctonus ponderosae]	227	4e-135	1254	99.1	100
TRINITY_DN29553_c0_g1	XP_002603284.1	hypothetical protein BRAFLDRAFT_226361 [Branchiostoma floridae] >EEN59295.1 hypothetical protein BRAFLDRAFT_226361, partial [Branchiostoma floridae]	105	4.1e-19	251	44.8	61
TRINITY_DN26138_c2_g3	XP_019758144.1	PREDICTED: atlastin [Dendroctonus ponderosae]	560	9.9e-299	2671	96.3	97.9
TRINITY_DN17892_c0_g1	RNA43200.1	Centaurin-gamma [Brachionus plicatilis]	215	1.4e-60	613	55.3	73
TRINITY_DN21557_c1_g6	XP_019753362.1	PREDICTED: uncharacterized protein LOC109532759 isoform X1 [Dendroctonus ponderosae]	36	4.2e-06	142	83.3	88.9
TRINITY_DN19709_c1_g2	XP_025997414.1	uncharacterized protein LOC113005757 [Solenopsis invicta]	54	3.8e-15	217	79.6	81.5
TRINITY_DN33261_c0_g1	EDL33790.1	guanine nucleotide binding protein (G protein), beta polypeptide 2 like 1, isoform CRA_a [Mus musculus] >EDM04194.1 rCG34190, isoform CRA_b [Rattus norvegicus]	80	7.5e-19	247	55	78.7
TRINITY_DN22488_c1_g1	XP_019759267.1	PREDICTED: ADP,ATP carrier protein 2-like [Dendroctonus ponderosae] >ENN77548.1 hypothetical protein YQE_05844, partial [Dendroctonus ponderosae] >ERL88543.1 hypothetical protein D910_05928 [Dendroctonus ponderosae]	219	9.7e-122	1142	99.1	99.5
TRINITY_DN22157_c0_g2	XP_019767496.1	PREDICTED: RNA-binding protein fusilli isoform X1 [Dendroctonus ponderosae] >XP_019767497.1 PREDICTED: RNA-binding protein fusilli isoform X2 [Dendroctonus ponderosae]	306	6.7e-130	1211	77.5	81
TRINITY_DN23672_c0_g1	XP_019754914.1	PREDICTED: peptidylglycine alpha-hydroxylating monooxygenase [Dendroctonus ponderosae] >ERL94776.1 hypothetical protein D910_12050 [Dendroctonus ponderosae]	342	1e-200	1825	97.4	98.2
TRINITY_DN25036_c0_g2	KRX12343.1	Chlorophyll a-b binding protein 40, chloroplastic [Trichinella nelsoni] >KRY99282.1 Chlorophyll a-b binding protein 40, chloroplastic [Trichinella zimbabwensis]	254	2.7e-94	903	69.3	76.8
TRINITY_DN31561_c0_g1	ENN77153.1	hypothetical protein YQE_06292, partial [Dendroctonus ponderosae]	134	6.5e-53	543	94	95.5
TRINITY_DN25481_c0_g4	XP_019773768.1	PREDICTED: FK506-binding protein 2 [Dendroctonus ponderosae] >AEE63536.1 unknown [Dendroctonus ponderosae]	216	2.1e-121	1138	99.5	99.5
TRINITY_DN20968_c0_g5	ERL83993.1	hypothetical protein D910_01309 [Dendroctonus ponderosae]	99	4.4e-19	250	51.5	63.6
TRINITY_DN24100_c1_g1	ENN73980.1	hypothetical protein YQE_09435, partial [Dendroctonus ponderosae]	97	8e-44	468	93.8	97.9
TRINITY_DN27055_c1_g3	ERL84661.1	hypothetical protein D910_02088, partial [Dendroctonus ponderosae]	112	2.1e-45	479	83.9	87.5
TRINITY_DN14337_c0_g1	XP_008398737.1	PREDICTED: thymosin beta-12-like [Poecilia reticulata]	52	1.5e-09	170	69.2	78.8
TRINITY_DN23617_c1_g3	ENN77438.1	hypothetical protein YQE_06262, partial [Dendroctonus ponderosae]	75	8.3e-32	360	90.7	94.7
TRINITY_DN22480_c2_g1	ENN80354.1	hypothetical protein YQE_03213, partial [Dendroctonus ponderosae]	187	7e-88	849	86.1	94.7
TRINITY_DN20583_c0_g8	ERL95312.1	hypothetical protein D910_12578 [Dendroctonus ponderosae]	60	5.9e-18	239	75	83.3
TRINITY_DN11685_c0_g1	XP_027041682.1	40S ribosomal protein S8-like [Pocillopora damicornis]	77	3.2e-25	302	80.5	87
TRINITY_DN25362_c3_g2	XP_026313957.1	heat shock 70 kDa protein cognate 4 [Hyposmocoma kahamanoa]	50	9.2e-18	238	88	94
TRINITY_DN23647_c3_g1	XP_019772941.1	PREDICTED: uncharacterized protein LOC109546424 [Dendroctonus ponderosae]	149	1.6e-61	618	77.2	85.9
TRINITY_DN24826_c0_g1	XP_019769080.1	PREDICTED: NEDD8 ultimate buster 1-like [Dendroctonus ponderosae] >ENN71893.1 hypothetical protein YQE_11430, partial [Dendroctonus ponderosae]	615	4.7e-295	2640	88.6	92.5
TRINITY_DN23389_c0_g1	ENN82423.1	hypothetical protein YQE_01202, partial [Dendroctonus ponderosae]	220	1.9e-122	1150	97.3	99.1
TRINITY_DN23436_c0_g3	KZR99127.1	Uncharacterized protein APZ42_005135 [Daphnia magna]	67	3.3e-10	175	58.2	64.2
TRINITY_DN20462_c2_g3	ENN80821.1	hypothetical protein YQE_02764, partial [Dendroctonus ponderosae]	39	1.6e-06	145	69.2	79.5
TRINITY_DN23384_c0_g1	XP_019759807.1	PREDICTED: calcitonin gene-related peptide type 1 receptor-like [Dendroctonus ponderosae] >XP_019759808.1 PREDICTED: calcitonin gene-related peptide type 1 receptor-like [Dendroctonus ponderosae] >AEE63114.1 unknown [Dendroctonus ponderosae] >ENN77434.1 hypothetical protein YQE_06258, partial [Dendroctonus ponderosae]	255	1.4e-131	1226	89.4	93.3
TRINITY_DN26664_c1_g1	AEE61775.1	unknown [Dendroctonus ponderosae]	62	7.3e-31	357	100	100
TRINITY_DN20072_c0_g1	XP_019758580.1	PREDICTED: cGMP-dependent protein kinase, isozyme 2 forms cD5/T2 [Dendroctonus ponderosae]	384	1.7e-183	1674	89.8	93.5
TRINITY_DN23816_c0_g2	XP_019762980.1	PREDICTED: cytoplasmic tRNA 2-thiolation protein 1 [Dendroctonus ponderosae] >ENN75425.1 hypothetical protein YQE_07976, partial [Dendroctonus ponderosae] >ERL94152.1 hypothetical protein D910_11434 [Dendroctonus ponderosae]	369	3.9e-194	1765	92.1	93.2
TRINITY_DN23917_c0_g2	XP_019773662.1	PREDICTED: uncharacterized protein LOC109546927 isoform X2 [Dendroctonus ponderosae]	90	2.9e-35	393	85.6	93.3
TRINITY_DN26161_c0_g2	ERL93080.1	hypothetical protein D910_10382 [Dendroctonus ponderosae]	60	2e-26	316	98.3	100
TRINITY_DN6993_c0_g1	EFA09106.1	hypothetical protein TcasGA2_TC015228 [Tribolium castaneum]	129	3.5e-43	459	66.7	76.7
TRINITY_DN24733_c7_g1	XP_019771924.1	PREDICTED: acetylcholine receptor subunit alpha-L1 [Dendroctonus ponderosae]	372	2.6e-199	1812	98.9	99.5
TRINITY_DN5897_c0_g1	XP_005965815.1	PREDICTED: probable mannitol dehydrogenase-like [Pantholops hodgsonii]	72	1.2e-18	245	58.3	72.2
TRINITY_DN25518_c0_g3	XP_019770260.1	PREDICTED: titin-like [Dendroctonus ponderosae]	172	1.2e-83	809	89	93
TRINITY_DN16116_c0_g2	ERL90936.1	hypothetical protein D910_08278 [Dendroctonus ponderosae]	234	4.5e-131	1219	94.9	97.4
TRINITY_DN27192_c3_g1	XP_019764822.1	PREDICTED: putative inorganic phosphate cotransporter [Dendroctonus ponderosae] >ENN74416.1 hypothetical protein YQE_09001, partial [Dendroctonus ponderosae]	139	6.7e-68	680	97.8	100
TRINITY_DN25719_c0_g4	XP_019770662.1	PREDICTED: uncharacterized protein LOC109544771 [Dendroctonus ponderosae] >ENN70930.1 hypothetical protein YQE_12332, partial [Dendroctonus ponderosae]	240	3.4e-121	1134	95.4	99.2
TRINITY_DN27239_c2_g1	XP_019757863.1	PREDICTED: DNA-directed RNA polymerase III subunit RPC8 [Dendroctonus ponderosae] >AEE63577.1 unknown [Dendroctonus ponderosae] >ENN78329.1 hypothetical protein YQE_05132, partial [Dendroctonus ponderosae] >ERL86837.1 hypothetical protein D910_04240 [Dendroctonus ponderosae]	211	3.6e-105	1000	87.2	95.7
TRINITY_DN16349_c0_g1	ACZ13350.1	small HSP21-like protein [Bursaphelenchus xylophilus]	103	1.1e-07	153	37.9	59.2
TRINITY_DN25905_c1_g1	XP_019764086.1	PREDICTED: uncharacterized protein LOC109540239 isoform X1 [Dendroctonus ponderosae]	721	0	3201	92.6	96
TRINITY_DN23335_c0_g1	ERL86475.1	hypothetical protein D910_03881 [Dendroctonus ponderosae]	358	1.4e-187	1711	89.1	92.5
TRINITY_DN22295_c2_g2	XP_017796825.1	PREDICTED: histone-lysine N-methyltransferase SETMAR-like [Habropoda laboriosa]	41	7.9e-06	137	61	80.5
TRINITY_DN27654_c2_g3	PNF19682.1	hypothetical protein B7P43_G16061 [Cryptotermes secundus]	82	1e-16	229	56.1	70.7
TRINITY_DN25555_c1_g1	XP_019761596.1	PREDICTED: division abnormally delayed protein [Dendroctonus ponderosae]	601	1.5e-305	2730	93.2	96.3
TRINITY_DN27157_c0_g1	ERL87170.1	hypothetical protein D910_04570 [Dendroctonus ponderosae]	659	0	3301	94.4	95.8
TRINITY_DN20448_c3_g6	XP_019755116.1	PREDICTED: uncharacterized protein LOC109534011 [Dendroctonus ponderosae]	68	5.3e-15	215	64.7	83.8
TRINITY_DN18979_c0_g1	OCT55184.1	hypothetical protein XELAEV_18004002mg, partial [Xenopus laevis]	91	2e-43	460	100	100
TRINITY_DN26710_c0_g2	XP_018359895.1	PREDICTED: uncharacterized protein LOC108759103 [Trachymyrmex cornetzi]	127	2.4e-33	374	56.7	74
TRINITY_DN26635_c1_g2	ENN76706.1	hypothetical protein YQE_06771, partial [Dendroctonus ponderosae]	54	3.9e-09	169	57.4	72.2
TRINITY_DN24992_c0_g4	ENN81645.1	hypothetical protein YQE_01943, partial [Dendroctonus ponderosae]	252	7.3e-95	909	72.6	79.4
TRINITY_DN18475_c0_g1	VDD86315.1	unnamed protein product [Enterobius vermicularis]	81	2.1e-11	187	46.9	65.4
TRINITY_DN26800_c1_g1	XP_019763819.1	PREDICTED: uncharacterized protein LOC109540075 isoform X9 [Dendroctonus ponderosae]	822	1.3e-309	2766	78.3	79.3
TRINITY_DN12079_c1_g1	XP_005970472.1	PREDICTED: dihydroorotate dehydrogenase (quinone), mitochondrial-like [Pantholops hodgsonii]	73	1.8e-30	347	98.6	98.6
TRINITY_DN24584_c0_g1	XP_019770996.1	PREDICTED: BTB/POZ domain-containing protein 6 isoform X1 [Dendroctonus ponderosae] >XP_019770997.1 PREDICTED: BTB/POZ domain-containing protein 6 isoform X1 [Dendroctonus ponderosae]	581	0	2881	98.5	98.8
TRINITY_DN26560_c0_g1	XP_019769462.1	PREDICTED: 28S ribosomal protein S30, mitochondrial [Dendroctonus ponderosae] >AEE62363.1 unknown [Dendroctonus ponderosae] >ENN71725.1 hypothetical protein YQE_11648, partial [Dendroctonus ponderosae]	547	4e-295	2640	89.4	94.9
TRINITY_DN12448_c0_g1	AEE61665.1	unknown [Dendroctonus ponderosae]	181	1.4e-97	930	96.1	98.9
TRINITY_DN24341_c1_g7	XP_011568960.1	PREDICTED: RNA-directed DNA polymerase from mobile element jockey-like [Plutella xylostella]	53	8e-10	170	60.4	71.7
TRINITY_DN27294_c1_g1	XP_019773681.1	PREDICTED: tankyrase [Dendroctonus ponderosae]	1143	0	4087	98.2	99
TRINITY_DN23291_c0_g2	XP_019767435.1	PREDICTED: uncharacterized protein LOC109542592 isoform X1 [Dendroctonus ponderosae]	2095	0	7041	71.4	78.9
TRINITY_DN20503_c1_g4	XP_019759484.1	PREDICTED: 39S ribosomal protein L15, mitochondrial [Dendroctonus ponderosae] >ENN77297.1 hypothetical protein YQE_06123, partial [Dendroctonus ponderosae] >ERL91556.1 hypothetical protein D910_08886 [Dendroctonus ponderosae]	33	1.5e-08	160	90.9	93.9
TRINITY_DN26240_c0_g1	XP_019771733.1	PREDICTED: vigilin [Dendroctonus ponderosae]	1242	0	6240	98.3	99.4
TRINITY_DN20411_c0_g1	AAC16610.1	transposase [Drosophila simulans] >AAC16611.1 transposase [Drosophila simulans] >AAC16615.1 transposase [Drosophila simulans]	158	6.1e-50	524	60.8	77.8
TRINITY_DN26345_c0_g1	XP_019758310.1	PREDICTED: diuretic hormone receptor-like [Dendroctonus ponderosae]	483	7.9e-149	1378	67.1	67.7
TRINITY_DN27744_c2_g1	KFM64783.1	Hypothetical protein in type-1 retrotransposable element R1DM, partial [Stegodyphus mimosarum]	231	5.2e-23	289	31.2	53.7
TRINITY_DN22490_c0_g2	XP_019758038.1	PREDICTED: enhancer of mRNA-decapping protein 3 [Dendroctonus ponderosae] >XP_019758039.1 PREDICTED: enhancer of mRNA-decapping protein 3 [Dendroctonus ponderosae]	300	1.6e-117	1107	75.7	77.3
TRINITY_DN24157_c0_g1	XP_019757099.1	PREDICTED: putative ATP-dependent RNA helicase me31b isoform X1 [Dendroctonus ponderosae] >XP_019757100.1 PREDICTED: putative ATP-dependent RNA helicase me31b isoform X1 [Dendroctonus ponderosae] >XP_019757102.1 PREDICTED: putative ATP-dependent RNA helicase me31b isoform X1 [Dendroctonus ponderosae]	441	1.7e-249	2247	98.2	99.8
TRINITY_DN20471_c1_g1	XP_019754691.1	PREDICTED: ras-related protein Rab-33B-like [Dendroctonus ponderosae] >AEE62662.1 unknown [Dendroctonus ponderosae] >ENN80389.1 hypothetical protein YQE_03191, partial [Dendroctonus ponderosae] >ERL86894.1 hypothetical protein D910_04297 [Dendroctonus ponderosae]	203	6.7e-98	934	86.2	92.6
TRINITY_DN15301_c0_g1	XP_022199400.1	uncharacterized protein LOC111056347, partial [Nilaparvata lugens]	84	1.4e-20	266	50	69
TRINITY_DN17953_c0_g1	KRY62694.1	Metallothionein-like protein 4A, partial [Trichinella pseudospiralis]	79	7e-07	147	59.5	67.1
TRINITY_DN23664_c1_g5	ERL85544.1	hypothetical protein D910_02963 [Dendroctonus ponderosae]	51	3.3e-07	148	64.7	78.4
TRINITY_DN27448_c1_g1	XP_019762497.1	PREDICTED: uncharacterized protein LOC109539281 isoform X3 [Dendroctonus ponderosae]	1115	0	4437	92.7	94.1
TRINITY_DN22383_c0_g2	XP_019760645.1	PREDICTED: zinc finger protein 184-like [Dendroctonus ponderosae]	77	1.7e-12	198	55.8	66.2
TRINITY_DN23890_c0_g3	XP_019757619.1	PREDICTED: uncharacterized protein LOC109535998 [Dendroctonus ponderosae]	385	4.3e-144	1335	66	78.2
TRINITY_DN27658_c6_g1	ERL95511.1	hypothetical protein D910_12773 [Dendroctonus ponderosae]	943	0	4164	84.5	90.7
TRINITY_DN12756_c0_g1	ENN73860.1	hypothetical protein YQE_09552, partial [Dendroctonus ponderosae] >ERL94927.1 hypothetical protein D910_12199 [Dendroctonus ponderosae]	154	2e-15	220	81.8	85.1
TRINITY_DN27112_c0_g2	XP_019758949.1	PREDICTED: zinc finger CCHC domain-containing protein 24-like isoform X2 [Dendroctonus ponderosae] >ENN77714.1 hypothetical protein YQE_05786, partial [Dendroctonus ponderosae]	240	1e-129	1211	98.3	99.6
TRINITY_DN25743_c0_g1	XP_019760933.1	PREDICTED: uncharacterized protein LOC109538231 [Dendroctonus ponderosae]	157	1.8e-20	269	39.5	60.5
TRINITY_DN26245_c0_g1	XP_019761435.1	PREDICTED: solute carrier family 12 member 9 [Dendroctonus ponderosae]	490	1.5e-264	2375	97.1	98.6
TRINITY_DN15408_c0_g1	ENN81511.1	hypothetical protein YQE_02040, partial [Dendroctonus ponderosae]	110	3.5e-54	553	100	100
TRINITY_DN25958_c0_g6	ENN74244.1	hypothetical protein YQE_09216, partial [Dendroctonus ponderosae]	31	5.4e-09	166	100	100
TRINITY_DN20221_c0_g2	CCG58586.1	Protein CBG24470 [Caenorhabditis briggsae]	110	8.3e-08	157	30.9	54.5
TRINITY_DN23396_c0_g1	XP_019765161.1	PREDICTED: pair-rule protein odd-paired-like [Dendroctonus ponderosae] >ENN74168.1 hypothetical protein YQE_09141, partial [Dendroctonus ponderosae] >ERL94302.1 hypothetical protein D910_11583 [Dendroctonus ponderosae]	371	1.6e-178	1632	98.1	98.9
TRINITY_DN18668_c0_g1	ERL91880.1	hypothetical protein D910_09204 [Dendroctonus ponderosae]	354	2.9e-198	1800	93.8	98
TRINITY_DN19442_c0_g1	XP_019773549.1	PREDICTED: apolipoprotein D-like [Dendroctonus ponderosae] >ENN81477.1 hypothetical protein YQE_02169, partial [Dendroctonus ponderosae] >ERL92100.1 hypothetical protein D910_09421 [Dendroctonus ponderosae]	151	1.2e-73	726	94.7	99.3
TRINITY_DN18458_c0_g3	XP_019755314.1	PREDICTED: uncharacterized protein LOC109534183 [Dendroctonus ponderosae] >ENN80002.1 hypothetical protein YQE_03563, partial [Dendroctonus ponderosae] >ERL93766.1 hypothetical protein D910_11052 [Dendroctonus ponderosae]	69	1.9e-27	324	85.5	95.7
TRINITY_DN14117_c0_g1	XP_006902027.1	PREDICTED: 60S acidic ribosomal protein P1-like [Elephantulus edwardii]	38	4.3e-10	171	89.5	97.4
TRINITY_DN22366_c0_g1	ERL85360.1	hypothetical protein D910_02780 [Dendroctonus ponderosae]	68	1.6e-26	322	94.1	97.1
TRINITY_DN18384_c0_g1	XP_019754265.1	PREDICTED: uncharacterized protein LOC109533401 [Dendroctonus ponderosae]	231	9.5e-37	406	50.6	56.3
TRINITY_DN21247_c0_g1	AEE63611.1	unknown [Dendroctonus ponderosae]	163	6.1e-87	843	98.2	98.8
TRINITY_DN26761_c1_g1	XP_019753703.1	PREDICTED: fatty acid hydroxylase domain-containing protein 2 [Dendroctonus ponderosae]	389	1.1e-225	2041	98.7	99.2
TRINITY_DN24254_c0_g3	KYQ59324.1	hypothetical protein ALC60_01634, partial [Trachymyrmex zeteki]	61	1.9e-06	143	42.6	57.4
TRINITY_DN25872_c0_g2	XP_019767998.1	PREDICTED: myb-binding protein 1A-like protein [Dendroctonus ponderosae]	1025	0	4161	90.3	91.8
TRINITY_DN25465_c0_g2	ERL92980.1	hypothetical protein D910_10283 [Dendroctonus ponderosae]	184	1.2e-68	683	73.4	78.3
TRINITY_DN21269_c0_g1	XP_019764926.1	PREDICTED: SAFB-like transcription modulator [Dendroctonus ponderosae]	552	4.1e-158	1459	82.2	84.8
TRINITY_DN20176_c1_g6	XP_019760613.1	PREDICTED: neurogenic locus protein delta [Dendroctonus ponderosae]	764	2e-258	2324	98.2	98.2
TRINITY_DN25925_c0_g1	AEE61790.1	unknown [Dendroctonus ponderosae]	267	2e-107	1019	74.5	84.3
TRINITY_DN22496_c1_g3	XP_019771616.1	PREDICTED: protein gooseberry-neuro-like [Dendroctonus ponderosae]	89	3.4e-40	432	89.9	97.8
TRINITY_DN23684_c0_g1	XP_019771916.1	PREDICTED: ultraviolet-B receptor UVR8 isoform X1 [Dendroctonus ponderosae]	329	1.3e-174	1600	91.5	95.1
TRINITY_DN25513_c0_g1	XP_019767792.1	PREDICTED: sulfite oxidase [Dendroctonus ponderosae]	308	1.3e-141	1314	83.1	87
TRINITY_DN24881_c1_g1	XP_019768081.1	PREDICTED: N-acetyl-D-glucosamine kinase [Dendroctonus ponderosae] >ENN72511.1 hypothetical protein YQE_10852, partial [Dendroctonus ponderosae]	338	5.2e-168	1541	87.6	93.2
TRINITY_DN24947_c4_g4	XP_019770268.1	PREDICTED: uncharacterized protein LOC109544488 [Dendroctonus ponderosae]	132	7.2e-17	232	65.9	69.7
TRINITY_DN25863_c0_g4	XP_028566005.1	uncharacterized protein LOC114586556 isoform X1 [Podarcis muralis]	88	5.1e-07	149	45.5	59.1
TRINITY_DN24523_c0_g1	XP_019753576.1	PREDICTED: 5'-nucleotidase domain-containing protein 3 isoform X1 [Dendroctonus ponderosae]	515	9.5e-309	2759	99.2	99.6
TRINITY_DN20788_c0_g1	XP_023012764.1	cyclin-J-like protein isoform X1 [Leptinotarsa decemlineata]	246	1.6e-71	709	52.4	73.6
TRINITY_DN27556_c1_g7	XP_019770495.1	PREDICTED: lysozyme-like [Dendroctonus ponderosae] >ENN71209.1 hypothetical protein YQE_12138, partial [Dendroctonus ponderosae] >ERL89182.1 hypothetical protein D910_06556 [Dendroctonus ponderosae]	28	6.9e-08	153	100	100
TRINITY_DN26387_c0_g2	XP_019773350.1	PREDICTED: 1-acyl-sn-glycerol-3-phosphate acyltransferase gamma-like [Dendroctonus ponderosae] >ENN81517.1 hypothetical protein YQE_02046, partial [Dendroctonus ponderosae] >ERL91784.1 hypothetical protein D910_09109 [Dendroctonus ponderosae]	117	1.3e-62	632	95.7	100
TRINITY_DN25005_c1_g2	ERL93335.1	hypothetical protein D910_10628 [Dendroctonus ponderosae]	531	1.1e-298	2672	91.3	96.4
TRINITY_DN1318_c0_g1	ENN81591.1	hypothetical protein YQE_02001, partial [Dendroctonus ponderosae]	78	2.6e-35	389	89.7	91
TRINITY_DN13304_c0_g2	XP_019766901.1	PREDICTED: uncharacterized protein LOC109542213 [Dendroctonus ponderosae]	151	1.2e-56	576	96	98
TRINITY_DN24442_c0_g1	XP_019763685.1	PREDICTED: ras-related protein rab7 [Dendroctonus ponderosae]	208	7.4e-115	1085	99.5	99.5
TRINITY_DN26959_c1_g1	ERL95051.1	hypothetical protein D910_12321 [Dendroctonus ponderosae]	719	0	3394	91.8	94.2
TRINITY_DN21573_c1_g1	XP_019758786.1	PREDICTED: uncharacterized protein LOC109536823 [Dendroctonus ponderosae] >ENN77828.1 hypothetical protein YQE_05711, partial [Dendroctonus ponderosae] >ERL95121.1 hypothetical protein D910_12391 [Dendroctonus ponderosae]	219	4.9e-108	1021	87.2	92.7
TRINITY_DN25539_c1_g3	XP_019753359.1	PREDICTED: protein jagged-1b isoform X1 [Dendroctonus ponderosae]	717	8.3e-277	2482	99.6	99.7
TRINITY_DN25779_c5_g1	ENN81260.1	hypothetical protein YQE_02354, partial [Dendroctonus ponderosae]	235	3.3e-128	1195	91.5	97.4
TRINITY_DN15948_c0_g2	XP_024507764.1	dTDP-D-glucose 4,6-dehydratase [Strongyloides ratti] >CEF68564.1 dTDP-D-glucose 4,6-dehydratase [Strongyloides ratti]	60	9.8e-06	142	45	61.7
TRINITY_DN11393_c0_g1	TDH10400.1	hypothetical protein EPR50_G00075050 [Perca flavescens]	135	1.7e-66	660	98.5	98.5
TRINITY_DN16795_c0_g3	XP_017823929.1	PREDICTED: 40S ribosomal protein S4, X isoform [Callithrix jacchus]	84	6.9e-42	446	100	100
TRINITY_DN23408_c3_g1	XP_019769181.1	PREDICTED: uncharacterized protein LOC109543764 [Dendroctonus ponderosae]	105	6.8e-42	452	91.4	97.1
TRINITY_DN15855_c0_g1	XP_019769173.1	PREDICTED: uncharacterized protein LOC109543756 [Dendroctonus ponderosae] >AEE61396.1 unknown [Dendroctonus ponderosae] >ENN71860.1 hypothetical protein YQE_11475, partial [Dendroctonus ponderosae] >ERL95014.1 hypothetical protein D910_12284 [Dendroctonus ponderosae]	29	2.4e-06	139	93.1	100
TRINITY_DN27447_c0_g1	XP_019754829.1	PREDICTED: protein capicua homolog isoform X2 [Dendroctonus ponderosae]	1293	0	6148	96.4	97.7
TRINITY_DN21164_c0_g3	XP_019768155.1	PREDICTED: glutamate dehydrogenase, mitochondrial isoform X1 [Dendroctonus ponderosae]	38	5.1e-12	194	100	100
TRINITY_DN27755_c4_g2	XP_028151596.1	uncharacterized protein LOC114344978 [Diabrotica virgifera virgifera]	307	2.5e-31	360	28	51.1
TRINITY_DN25080_c1_g2	XP_011699221.1	PREDICTED: multidrug resistance-associated protein 1 isoform X9 [Wasmannia auropunctata]	1459	3.6e-233	2107	37.1	54.5
TRINITY_DN19284_c0_g3	XP_019771870.1	PREDICTED: uncharacterized protein C4orf22 homolog [Dendroctonus ponderosae] >ENN70439.1 hypothetical protein YQE_12943, partial [Dendroctonus ponderosae]	28	9e-07	144	89.3	92.9
TRINITY_DN19351_c0_g3	XP_019767977.1	PREDICTED: uncharacterized protein LOC109542950 [Dendroctonus ponderosae]	68	9.8e-18	237	80.9	83.8
TRINITY_DN23323_c0_g4	ERL87746.1	hypothetical protein D910_05135 [Dendroctonus ponderosae]	863	1.3e-296	2655	73.7	78.4
TRINITY_DN23714_c0_g8	XP_019773008.1	PREDICTED: uncharacterized protein LOC109546472 isoform X1 [Dendroctonus ponderosae]	79	9.7e-19	250	60.8	79.7
TRINITY_DN25987_c0_g4	XP_018916932.1	PREDICTED: uncharacterized protein LOC109043975 [Bemisia tabaci]	64	1.4e-13	205	57.8	75
TRINITY_DN21676_c2_g2	XP_019755379.1	PREDICTED: uncharacterized protein LOC109534234, partial [Dendroctonus ponderosae]	93	6.1e-16	225	57	64.5
TRINITY_DN29940_c0_g1	AAL68063.1	AT13581p [Drosophila melanogaster]	80	1.1e-07	151	37.5	55
TRINITY_DN24208_c0_g2	VDM28456.1	unnamed protein product [Toxocara canis]	60	1e-09	171	65	71.7
TRINITY_DN24842_c0_g1	XP_019764943.1	PREDICTED: D-aspartate oxidase-like, partial [Dendroctonus ponderosae]	176	2.1e-97	928	94.9	98.9
TRINITY_DN27290_c1_g3	XP_018898679.1	PREDICTED: succinate dehydrogenase assembly factor 3, mitochondrial [Bemisia tabaci]	96	7.3e-22	274	53.1	69.8
TRINITY_DN29016_c0_g1	ABP04046.1	glutathione peroxidase-like protein, partial [Crassostrea ariakensis]	209	2.7e-25	308	37.8	52.2
TRINITY_DN25105_c0_g1	XP_019771325.1	PREDICTED: UDP-N-acetylglucosamine--peptide N-acetylglucosaminyltransferase 110 kDa subunit [Dendroctonus ponderosae]	566	0	2916	97.5	98.8
TRINITY_DN21105_c1_g5	XP_019771965.1	PREDICTED: uncharacterized protein LOC109545618 [Dendroctonus ponderosae]	98	5e-22	276	54.1	68.4
TRINITY_DN17235_c0_g4	XP_019870242.1	PREDICTED: dnaJ homolog subfamily A member 1 [Aethina tumida] >XP_019870243.1 PREDICTED: dnaJ homolog subfamily A member 1 [Aethina tumida]	80	1e-11	186	51.2	62.5
TRINITY_DN29382_c0_g1	XP_003692081.1	PREDICTED: tubulin alpha-1 chain-like [Apis florea]	92	3e-46	484	100	100
TRINITY_DN24623_c0_g1	XP_019763097.1	PREDICTED: cytochrome c-type heme lyase [Dendroctonus ponderosae] >AEE62299.1 unknown [Dendroctonus ponderosae] >ENN75386.1 hypothetical protein YQE_07938, partial [Dendroctonus ponderosae] >ERL88076.1 hypothetical protein D910_05465 [Dendroctonus ponderosae]	243	9.3e-140	1299	95.9	98.4
TRINITY_DN20906_c0_g1	ROL46454.1	Glutamate receptor ionotropic, NMDA 2B [Anabarilius grahami]	86	2.7e-06	146	39.5	59.3
TRINITY_DN19178_c0_g1	XP_019760814.1	PREDICTED: synaptic vesicular amine transporter [Dendroctonus ponderosae]	501	3.7e-272	2441	97	98
TRINITY_DN12398_c0_g1	XP_019760237.1	PREDICTED: synaptotagmin-7 isoform X1 [Dendroctonus ponderosae] >XP_019760238.1 PREDICTED: synaptotagmin-7 isoform X1 [Dendroctonus ponderosae]	290	2.1e-170	1560	100	100
TRINITY_DN25141_c1_g4	XP_022186022.1	neuroblastoma-amplified sequence-like [Nilaparvata lugens]	79	3.7e-08	160	43	62
TRINITY_DN23223_c0_g1	EZA47209.1	THAP domain-containing protein [Ooceraea biroi]	264	4.8e-45	481	42	61.7
TRINITY_DN22535_c1_g1	XP_019753591.1	PREDICTED: solute carrier family 25 member 46-like isoform X3 [Dendroctonus ponderosae] >XP_019753592.1 PREDICTED: solute carrier family 25 member 46-like isoform X3 [Dendroctonus ponderosae]	150	5.2e-77	755	92	96.7
TRINITY_DN26063_c0_g1	XP_019767722.1	PREDICTED: calcyclin-binding protein isoform X1 [Dendroctonus ponderosae]	232	1.1e-118	1119	96.1	98.3
TRINITY_DN28867_c0_g1	ERL87217.1	hypothetical protein D910_04616, partial [Dendroctonus ponderosae]	49	1.4e-22	279	100	100
TRINITY_DN26192_c0_g1	XP_019761336.1	PREDICTED: dedicator of cytokinesis protein 9 [Dendroctonus ponderosae]	2105	0	10589	97.5	98.1
TRINITY_DN25018_c2_g2	ERL85139.1	hypothetical protein D910_02561 [Dendroctonus ponderosae]	455	5.1e-267	2399	99.1	99.8
TRINITY_DN21389_c2_g2	NP_001133760.1	Polypyrimidine tract-binding protein 1 [Salmo salar] >ACI33851.1 Polypyrimidine tract-binding protein 1 [Salmo salar]	30	9.8e-07	142	86.7	96.7
TRINITY_DN19895_c0_g1	ERL91220.1	hypothetical protein D910_08557 [Dendroctonus ponderosae]	502	1.3e-238	2151	86.1	92
TRINITY_DN23527_c1_g6	ENN78607.1	hypothetical protein YQE_04912, partial [Dendroctonus ponderosae]	92	3.6e-38	417	87	88
TRINITY_DN16453_c0_g3	XP_029195686.1	60S ribosomal protein L19-like [Acropora millepora]	84	2.8e-28	329	78.6	89.3
TRINITY_DN25426_c0_g1	XP_019759113.1	PREDICTED: protein unc-45 homolog B [Dendroctonus ponderosae] >ENN77600.1 hypothetical protein YQE_05895, partial [Dendroctonus ponderosae]	927	0	4609	97.7	98.9
TRINITY_DN26390_c0_g3	XP_023025845.1	pancreatic lipase-related protein 2-like [Leptinotarsa decemlineata]	309	2.3e-107	1016	57.6	74.1
TRINITY_DN23808_c0_g1	XP_019767158.1	PREDICTED: MLX-interacting protein isoform X1 [Dendroctonus ponderosae]	486	7.3e-264	2370	93.6	95.5
TRINITY_DN26871_c0_g1	XP_019755641.1	PREDICTED: surfeit locus protein 1 [Dendroctonus ponderosae] >ENN79910.1 hypothetical protein YQE_03729, partial [Dendroctonus ponderosae]	188	2e-99	952	94.7	96.3
TRINITY_DN24109_c1_g3	XP_018564219.1	tropomyosin-1, isoforms 9A/A/B isoform X2 [Anoplophora glabripennis]	44	1.2e-11	190	93.2	95.5
TRINITY_DN24952_c0_g1	XP_019770261.1	PREDICTED: aldehyde dehydrogenase, dimeric NADP-preferring-like isoform X1 [Dendroctonus ponderosae] >XP_019770262.1 PREDICTED: aldehyde dehydrogenase, dimeric NADP-preferring-like isoform X1 [Dendroctonus ponderosae] >XP_019770263.1 PREDICTED: aldehyde dehydrogenase, dimeric NADP-preferring-like isoform X1 [Dendroctonus ponderosae] >XP_019770264.1 PREDICTED: aldehyde dehydrogenase, dimeric NADP-…	533	4.3e-298	2664	94	97.7
TRINITY_DN23544_c0_g13	AAZ67094.1	transposase [Adineta vaga]	64	1.4e-10	179	53.1	71.9
TRINITY_DN20240_c0_g6	ADI61818.1	endonuclease-reverse transcriptase [Bombyx mori]	101	1.2e-08	160	39.6	53.5
TRINITY_DN21561_c2_g8	ADI61814.1	endonuclease-reverse transcriptase [Bombyx mori]	36	6.9e-06	135	63.9	80.6
TRINITY_DN25813_c0_g1	XP_019756818.1	PREDICTED: serine/threonine-protein kinase PAK mbt [Dendroctonus ponderosae]	579	0	2831	98.4	99.5
TRINITY_DN19663_c0_g1	XP_019763309.1	PREDICTED: uncharacterized protein LOC109539770 [Dendroctonus ponderosae]	239	1.4e-72	719	62.8	79.5
TRINITY_DN18327_c0_g1	XP_019760549.1	PREDICTED: adenylate kinase [Dendroctonus ponderosae] >ENN76846.1 hypothetical protein YQE_06687, partial [Dendroctonus ponderosae] >ERL94665.1 hypothetical protein D910_11940 [Dendroctonus ponderosae]	45	6.7e-17	235	100	100
TRINITY_DN16550_c0_g1	ENN77213.1	hypothetical protein YQE_06350, partial [Dendroctonus ponderosae]	37	3.5e-10	176	89.2	91.9
TRINITY_DN19837_c0_g1	ENN73022.1	hypothetical protein YQE_10357, partial [Dendroctonus ponderosae]	43	2.4e-10	179	86	88.4
TRINITY_DN15509_c0_g1	XP_019759863.1	PREDICTED: uncharacterized protein LOC109537525 [Dendroctonus ponderosae]	70	3.9e-22	277	71.4	77.1
TRINITY_DN22731_c0_g1	XP_019756132.1	PREDICTED: glycoprotein 3-alpha-L-fucosyltransferase A-like [Dendroctonus ponderosae]	441	9.1e-249	2238	96.1	97.5
TRINITY_DN20348_c4_g12	XP_004206238.1	PREDICTED: histone-lysine N-methyltransferase SETMAR-like [Hydra vulgaris]	47	6.8e-07	146	53.2	74.5
TRINITY_DN17351_c0_g2	XP_019773578.1	PREDICTED: aurora kinase B [Dendroctonus ponderosae] >ENN81411.1 hypothetical protein YQE_02182, partial [Dendroctonus ponderosae] >ERL83560.1 hypothetical protein D910_00643 [Dendroctonus ponderosae] >ERL84130.1 hypothetical protein D910_01481 [Dendroctonus ponderosae] >ERL84863.1 hypothetical protein D910_02286 [Dendroctonus ponderosae]	310	1.1e-158	1459	84.5	93.2
TRINITY_DN24005_c1_g1	XP_019771808.1	PREDICTED: sodium- and chloride-dependent GABA transporter ine-like [Dendroctonus ponderosae]	931	0	3480	78.4	82.3
TRINITY_DN20985_c0_g1	XP_018561917.1	60S ribosomal protein L23a [Anoplophora glabripennis]	89	2.5e-40	438	95.5	98.9
TRINITY_DN26085_c0_g2	XP_019767533.1	PREDICTED: nuclear inhibitor of protein phosphatase 1 [Dendroctonus ponderosae] >ENN72748.1 hypothetical protein YQE_10553, partial [Dendroctonus ponderosae] >ERL90881.1 hypothetical protein D910_08226 [Dendroctonus ponderosae]	214	2.4e-110	1043	97.2	98.1
TRINITY_DN25579_c1_g3	ENN75160.1	hypothetical protein YQE_08273, partial [Dendroctonus ponderosae]	66	2.7e-25	308	93.9	98.5
TRINITY_DN20844_c0_g1	XP_019763254.1	PREDICTED: ATP-dependent RNA helicase SUV3 homolog, mitochondrial isoform X1 [Dendroctonus ponderosae] >ENN75346.1 hypothetical protein YQE_08122, partial [Dendroctonus ponderosae]	758	0	3873	97.2	98.7
TRINITY_DN25495_c0_g1	ERL86491.1	hypothetical protein D910_03895 [Dendroctonus ponderosae]	360	3.8e-197	1792	95.8	98.1
TRINITY_DN23698_c0_g6	ENN80106.1	hypothetical protein YQE_03465, partial [Dendroctonus ponderosae]	65	1.8e-23	289	92.3	95.4
TRINITY_DN25414_c0_g2	XP_011260140.1	craniofacial development protein 2 [Camponotus floridanus]	393	8.6e-18	246	28.2	36.9
TRINITY_DN15890_c0_g1	XP_018865982.1	PREDICTED: pyruvate kinase PKM isoform X3 [Gorilla gorilla gorilla] >EAW77886.1 pyruvate kinase, muscle, isoform CRA_c [Homo sapiens]	465	9.8e-264	2366	99.6	99.8
TRINITY_DN14566_c0_g1	ERL96058.1	hypothetical protein D910_00903 [Dendroctonus ponderosae]	82	3.7e-28	328	69.5	91.5
TRINITY_DN26752_c1_g1	XP_019764169.1	PREDICTED: eIF-2-alpha kinase activator GCN1 isoform X1 [Dendroctonus ponderosae]	2663	0	12502	93.6	96.2
TRINITY_DN27072_c1_g4	XP_023312232.1	uncharacterized protein LOC111692445, partial [Anoplophora glabripennis]	77	3.7e-09	165	45.5	55.8
TRINITY_DN24160_c1_g1	XP_019756885.1	PREDICTED: peroxisome assembly factor 2 [Dendroctonus ponderosae]	752	0	3647	91.6	95.9
TRINITY_DN22642_c3_g1	XP_019769749.1	PREDICTED: influenza virus NS1A-binding protein homolog isoform X2 [Dendroctonus ponderosae] >XP_019769750.1 PREDICTED: influenza virus NS1A-binding protein homolog isoform X2 [Dendroctonus ponderosae] >XP_019769752.1 PREDICTED: influenza virus NS1A-binding protein homolog isoform X2 [Dendroctonus ponderosae]	27	4.3e-06	144	100	100
TRINITY_DN27300_c1_g15	ERL93526.1	hypothetical protein D910_10815 [Dendroctonus ponderosae]	70	1.2e-12	194	54.3	71.4
TRINITY_DN25446_c0_g3	XP_019771984.1	PREDICTED: transmembrane protein 214-A [Dendroctonus ponderosae]	646	0	2830	88.5	92.9
TRINITY_DN17438_c0_g4	VDM29392.1	unnamed protein product [Toxocara canis]	124	7.8e-10	176	35.5	50
TRINITY_DN22844_c0_g2	XP_019770884.1	PREDICTED: inactive tyrosine-protein kinase 7-like [Dendroctonus ponderosae]	117	2.4e-56	575	93.2	94.9
TRINITY_DN25963_c0_g2	XP_028154742.1	uncharacterized protein LOC114348361 [Diabrotica virgifera virgifera]	130	5.2e-07	151	30	50
TRINITY_DN21539_c2_g8	ERL95927.1	hypothetical protein D910_00608 [Dendroctonus ponderosae]	314	2e-119	1120	63.7	79.6
TRINITY_DN12956_c0_g1	RZC42896.1	DDE Tnp 1 7 domain containing protein [Asbolus verrucosus]	83	1.3e-16	228	51.8	68.7
TRINITY_DN3367_c0_g1	XP_021339543.1	60S ribosomal protein L10-like [Mizuhopecten yessoensis]	115	1.9e-42	452	68.7	87
TRINITY_DN19903_c0_g1	ERL91071.1	hypothetical protein D910_08413 [Dendroctonus ponderosae]	432	3.7e-241	2172	93.5	96.3
TRINITY_DN25404_c0_g1	XP_023213165.1	uncharacterized protein LOC111615966 [Centruroides sculpturatus]	190	1e-14	217	30	45.8
TRINITY_DN25891_c1_g1	XP_019754293.1	PREDICTED: anaphase-promoting complex subunit 1 [Dendroctonus ponderosae]	1815	0	8671	90.7	94.3
TRINITY_DN20226_c0_g1	ENN74177.1	hypothetical protein YQE_09150, partial [Dendroctonus ponderosae]	422	1.7e-224	2030	93.8	96.2
TRINITY_DN30698_c0_g1	PAV92400.1	hypothetical protein WR25_23396 [Diploscapter pachys]	47	7.6e-14	204	87.2	91.5
TRINITY_DN20561_c1_g3	XP_002435918.1	hypothetical protein IscW_ISCW024385 [Ixodes scapularis] >EEC08748.1 hypothetical protein IscW_ISCW024385, partial [Ixodes scapularis]	88	6.1e-27	318	70.5	73.9
TRINITY_DN19562_c0_g3	KDR18473.1	hypothetical protein L798_07477 [Zootermopsis nevadensis]	55	8.7e-09	166	52.7	70.9
TRINITY_DN23166_c0_g1	ERL86034.1	hypothetical protein D910_03448 [Dendroctonus ponderosae]	44	2.9e-12	193	86.4	90.9
TRINITY_DN21802_c1_g2	KRX12343.1	Chlorophyll a-b binding protein 40, chloroplastic [Trichinella nelsoni] >KRY99282.1 Chlorophyll a-b binding protein 40, chloroplastic [Trichinella zimbabwensis]	174	9.2e-87	836	90.2	96
TRINITY_DN27578_c2_g1	RZF39012.1	hypothetical protein LSTR_LSTR014708 [Laodelphax striatella]	122	8.6e-38	414	61.5	80.3
TRINITY_DN22758_c0_g2	ENN70254.1	hypothetical protein YQE_13037, partial [Dendroctonus ponderosae]	175	4.2e-93	891	96	97.1
TRINITY_DN19454_c1_g1	XP_019757187.1	PREDICTED: uncharacterized protein LOC109535692 [Dendroctonus ponderosae]	36	2.8e-09	167	97.2	100
TRINITY_DN19463_c1_g9	OZG19226.1	hypothetical protein FL83_06617, partial [Caenorhabditis latens]	140	4.5e-33	376	53.6	71.4
TRINITY_DN22634_c0_g1	XP_019767499.1	PREDICTED: transcription factor TFIIIB component B'' homolog [Dendroctonus ponderosae]	713	7.3e-301	2688	79.5	86.5
TRINITY_DN27590_c2_g2	VDD97763.1	unnamed protein product [Enterobius vermicularis]	46	4.1e-06	141	60.9	73.9
TRINITY_DN25602_c0_g1	XP_023313209.1	uncharacterized protein LOC111693200 [Anoplophora glabripennis]	63	1.2e-07	151	46	65.1
TRINITY_DN24892_c2_g1	XP_019761275.1	PREDICTED: uncharacterized protein LOC109538471 isoform X1 [Dendroctonus ponderosae]	701	0	3053	95.7	97.6
TRINITY_DN20085_c0_g4	OXU32277.1	hypothetical protein TSAR_008098, partial [Trichomalopsis sarcophagae]	49	2.6e-06	140	55.1	75.5
TRINITY_DN26058_c0_g1	ERL90094.1	hypothetical protein D910_07448 [Dendroctonus ponderosae]	80	1.5e-38	417	93.8	100
TRINITY_DN24896_c0_g1	XP_019759835.1	PREDICTED: zinc finger protein 2 isoform X2 [Dendroctonus ponderosae]	242	1.3e-120	1131	90.9	94.2
TRINITY_DN23928_c0_g1	ERL93945.1	hypothetical protein D910_11231 [Dendroctonus ponderosae]	1507	0	7486	98.1	98.9
TRINITY_DN24375_c1_g2	XP_019762890.1	PREDICTED: uncharacterized protein LOC109539537 isoform X2 [Dendroctonus ponderosae]	1120	0	5148	92.6	96
TRINITY_DN24038_c2_g6	XP_026826676.1	uncharacterized protein LOC113562216 [Ooceraea biroi]	88	5.2e-22	275	60.2	73.9
TRINITY_DN24220_c0_g5	AEE61412.1	unknown [Dendroctonus ponderosae]	464	6.5e-242	2179	92.9	94.4
TRINITY_DN22279_c4_g2	XP_019762037.1	PREDICTED: uncharacterized protein LOC109538986 isoform X2 [Dendroctonus ponderosae]	299	7.1e-161	1481	87.6	93.6
TRINITY_DN21958_c2_g2	ENN70596.1	hypothetical protein YQE_12771, partial [Dendroctonus ponderosae]	235	5.9e-85	825	70.6	72.3
TRINITY_DN24002_c1_g5	ERL95330.1	hypothetical protein D910_12596, partial [Dendroctonus ponderosae]	97	2.1e-38	419	88.7	89.7
TRINITY_DN2217_c0_g1	ENN76795.1	hypothetical protein YQE_06636, partial [Dendroctonus ponderosae] >ERL94718.1 hypothetical protein D910_11992 [Dendroctonus ponderosae]	102	7.3e-46	481	96.1	98
TRINITY_DN26712_c0_g2	XP_019757918.1	PREDICTED: DNA polymerase epsilon catalytic subunit A [Dendroctonus ponderosae] >ENN78133.1 hypothetical protein YQE_05287, partial [Dendroctonus ponderosae]	638	0	3074	93.7	96.2
TRINITY_DN23675_c0_g2	XP_019765140.1	PREDICTED: gamma-interferon-inducible lysosomal thiol reductase-like [Dendroctonus ponderosae] >AEE62714.1 unknown [Dendroctonus ponderosae]	297	7.7e-105	997	68.7	71
TRINITY_DN24514_c0_g1	XP_019767318.1	PREDICTED: GDP-fucose protein O-fucosyltransferase 1 isoform X2 [Dendroctonus ponderosae] >ENN72900.1 hypothetical protein YQE_10470, partial [Dendroctonus ponderosae]	210	3.7e-112	1060	92.9	98.1
TRINITY_DN19867_c0_g1	XP_019757210.1	PREDICTED: adenosine kinase-like [Dendroctonus ponderosae]	288	9.4e-147	1356	92.4	95.5
TRINITY_DN10279_c0_g2	XP_019764244.1	PREDICTED: dynein heavy chain 7, axonemal [Dendroctonus ponderosae]	199	8.3e-110	1035	99	100
TRINITY_DN13007_c0_g1	ENN77478.1	hypothetical protein YQE_06006, partial [Dendroctonus ponderosae] >ERL89995.1 hypothetical protein D910_07354 [Dendroctonus ponderosae]	309	3.9e-160	1471	92.2	95.5
TRINITY_DN31557_c0_g1	XP_025997494.1	uncharacterized protein LOC105204755 [Solenopsis invicta]	77	2.8e-10	173	46.8	63.6
TRINITY_DN11071_c0_g1	VDM56517.1	unnamed protein product [Angiostrongylus costaricensis]	82	1.2e-14	214	43.9	63.4
TRINITY_DN17051_c0_g1	ENN76529.1	hypothetical protein YQE_06980, partial [Dendroctonus ponderosae]	153	4.4e-47	493	92.2	92.8
TRINITY_DN23499_c1_g2	XP_025997494.1	uncharacterized protein LOC105204755 [Solenopsis invicta]	110	6.1e-31	355	59.1	79.1
TRINITY_DN24986_c0_g2	XP_019756578.1	PREDICTED: telomere length regulation protein TEL2 homolog [Dendroctonus ponderosae]	1381	0	6226	92.3	94.9
TRINITY_DN21120_c0_g1	XP_019756995.1	PREDICTED: probable malate dehydrogenase, mitochondrial isoform X1 [Dendroctonus ponderosae]	357	2.6e-190	1734	92.4	95.8
TRINITY_DN25753_c3_g1	XP_019769256.1	PREDICTED: sodium/potassium-transporting ATPase subunit alpha isoform X1 [Dendroctonus ponderosae]	1034	0	5304	99.5	99.9
TRINITY_DN21228_c0_g2	VDP27522.1	unnamed protein product [Soboliphyme baturini]	121	2.8e-11	183	41.3	50.4
TRINITY_DN26797_c0_g2	AIX87801.1	cellular protein AbCp-85, partial [Androctonus bicolor]	73	8.6e-20	258	79.5	89
TRINITY_DN30479_c0_g1	ENN75789.1	hypothetical protein YQE_07746, partial [Dendroctonus ponderosae]	219	2.6e-120	1126	94.5	97.7
TRINITY_DN25241_c0_g2	ENN77632.1	hypothetical protein YQE_05926, partial [Dendroctonus ponderosae]	83	5.7e-40	436	95.2	97.6
TRINITY_DN21224_c0_g3	XP_017478987.1	PREDICTED: uncharacterized protein LOC108368613 [Rhagoletis zephyria]	55	8.6e-07	147	58.2	72.7
TRINITY_DN23288_c0_g1	XP_014365539.1	PREDICTED: RNA-directed DNA polymerase from mobile element jockey-like [Papilio machaon]	101	9.7e-26	311	60.4	75.2
TRINITY_DN17711_c0_g2	ENN80635.1	hypothetical protein YQE_02945, partial [Dendroctonus ponderosae] >ENN83037.1 hypothetical protein YQE_00601, partial [Dendroctonus ponderosae]	73	4.1e-28	330	79.5	89
TRINITY_DN25939_c1_g1	ENN72789.1	hypothetical protein YQE_10594, partial [Dendroctonus ponderosae]	1110	0	5232	91.2	95.4
TRINITY_DN26267_c1_g4	ENN70819.1	hypothetical protein YQE_12484, partial [Dendroctonus ponderosae] >ERL90397.1 hypothetical protein D910_07746 [Dendroctonus ponderosae]	162	1.7e-86	836	94.4	98.1
TRINITY_DN25671_c2_g1	XP_019754644.1	PREDICTED: protein diaphanous [Dendroctonus ponderosae]	67	6.7e-14	212	68.7	76.1
TRINITY_DN23234_c3_g1	ERL89075.1	hypothetical protein D910_06452 [Dendroctonus ponderosae]	97	2.6e-10	179	51.5	70.1
TRINITY_DN16918_c0_g1	XP_023014080.1	uncharacterized protein LOC111503880 [Leptinotarsa decemlineata]	230	6.7e-15	219	28.7	47.8
TRINITY_DN36167_c0_g1	XP_019766177.1	PREDICTED: probable glutamate receptor [Dendroctonus ponderosae]	76	8.3e-34	376	94.7	98.7
TRINITY_DN14632_c0_g2	XP_019760619.1	PREDICTED: oxysterol-binding protein-related protein 2 [Dendroctonus ponderosae]	326	6.9e-188	1711	96.9	99.1
TRINITY_DN22281_c0_g3	XP_019772167.1	PREDICTED: phytanoyl-CoA dioxygenase domain-containing protein 1 homolog [Dendroctonus ponderosae]	285	3.3e-150	1386	91.9	94.7
TRINITY_DN14612_c0_g1	XP_019761152.1	PREDICTED: uncharacterized protein LOC109538376 [Dendroctonus ponderosae]	366	1.1e-118	1114	76.2	81.4
TRINITY_DN26876_c1_g2	XP_019759174.1	PREDICTED: potassium voltage-gated channel subfamily H member 6 isoform X11 [Dendroctonus ponderosae]	953	0	4774	97.6	98
TRINITY_DN24154_c0_g7	XP_022160533.1	uncharacterized protein LOC111026710, partial [Myzus persicae]	130	1.4e-27	325	50	68.5
TRINITY_DN25030_c1_g1	XP_019756386.1	PREDICTED: glucose dehydrogenase [FAD, quinone] [Dendroctonus ponderosae]	611	0	3098	95.1	97.9
TRINITY_DN26761_c0_g2	XP_019758569.1	PREDICTED: NADH dehydrogenase [ubiquinone] 1 beta subcomplex subunit 10 [Dendroctonus ponderosae] >ENN77916.1 hypothetical protein YQE_05593, partial [Dendroctonus ponderosae] >ERL95416.1 hypothetical protein D910_12680 [Dendroctonus ponderosae]	29	5.3e-09	163	96.6	100
TRINITY_DN19601_c4_g3	ADI61819.1	endonuclease-reverse transcriptase [Bombyx mori]	70	9.7e-09	161	47.1	67.1
TRINITY_DN16728_c1_g1	ADL31200.1	cytochrome c oxidase subunit III (mitochondrion) [Homo sapiens] >AET08989.1 cytochrome c oxidase subunit III (mitochondrion) [Homo sapiens] >AET09028.1 cytochrome c oxidase subunit III (mitochondrion) [Homo sapiens] >AET09132.1 cytochrome c oxidase subunit III (mitochondrion) [Homo sapiens] >AET09184.1 cytochrome c oxidase subunit III (mitochondrion) [Homo sapiens] >AET09314.1 cytochrome c oxidas…	257	3.1e-135	1258	94.6	97.3
TRINITY_DN26083_c0_g1	XP_019769847.1	PREDICTED: glucose dehydrogenase [FAD, quinone]-like [Dendroctonus ponderosae]	639	0	3227	94.4	96.9
TRINITY_DN20001_c0_g9	AAZ67093.1	transposase [Adineta vaga]	67	5.1e-07	147	44.8	58.2
TRINITY_DN26106_c1_g2	XP_019762097.1	PREDICTED: 4-coumarate--CoA ligase-like [Dendroctonus ponderosae] >ENN75921.1 hypothetical protein YQE_07531, partial [Dendroctonus ponderosae]	602	0	3061	96.8	98.8
TRINITY_DN25474_c2_g2	ENN72074.1	hypothetical protein YQE_11359, partial [Dendroctonus ponderosae] >ERL85690.1 hypothetical protein D910_03106 [Dendroctonus ponderosae]	180	4.1e-48	505	95.6	98.3
TRINITY_DN25994_c1_g1	XP_019769349.1	PREDICTED: transmembrane protein 145-like [Dendroctonus ponderosae] >ENN71747.1 hypothetical protein YQE_11567, partial [Dendroctonus ponderosae]	290	6.5e-133	1241	86.2	87.6
TRINITY_DN19697_c0_g1	AEE62535.1	unknown [Dendroctonus ponderosae]	305	1.1e-169	1553	92.8	97.4
TRINITY_DN27039_c1_g1	XP_019762844.1	PREDICTED: LOW QUALITY PROTEIN: soma ferritin-like [Dendroctonus ponderosae]	174	3.3e-76	750	82.8	89.1
TRINITY_DN21822_c0_g1	XP_019772693.1	PREDICTED: probable phosphoserine aminotransferase [Dendroctonus ponderosae] >AEE61919.1 unknown [Dendroctonus ponderosae] >ENN81968.1 hypothetical protein YQE_01679, partial [Dendroctonus ponderosae]	188	1.2e-99	950	97.3	98.9
TRINITY_DN28482_c0_g1	RXG57673.1	putative acyl-CoA dehydrogenase 6, partial [Armadillidium vulgare]	65	2.1e-20	261	72.3	90.8
TRINITY_DN19724_c0_g1	XP_019762750.1	PREDICTED: DNA/RNA-binding protein KIN17 [Dendroctonus ponderosae] >ENN75526.1 hypothetical protein YQE_07869, partial [Dendroctonus ponderosae] >ERL92997.1 hypothetical protein D910_10300 [Dendroctonus ponderosae]	385	4.7e-196	1783	93.5	97.4
TRINITY_DN17494_c0_g1	XP_019763974.1	PREDICTED: syntaxin-binding protein 5-like isoform X1 [Dendroctonus ponderosae]	68	3.4e-31	358	100	100
TRINITY_DN27014_c0_g1	ERL84391.1	hypothetical protein D910_01824, partial [Dendroctonus ponderosae]	63	6.1e-25	306	95.2	96.8
TRINITY_DN28747_c0_g1	XP_018006181.1	PREDICTED: phosphoenolpyruvate synthase-like [Hyalella azteca]	80	3.6e-32	362	87.5	91.2
TRINITY_DN22443_c0_g1	XP_019770927.1	PREDICTED: transmembrane protease serine 9-like [Dendroctonus ponderosae]	383	8.5e-215	1944	94	97.7
TRINITY_DN21050_c0_g4	CBY14143.1	unnamed protein product [Oikopleura dioica]	54	1.2e-09	169	64.8	72.2
TRINITY_DN27449_c0_g1	XP_015435170.1	PREDICTED: tigger transposable element-derived protein 1-like [Dufourea novaeangliae]	74	1.6e-27	323	83.8	86.5
TRINITY_DN25469_c0_g2	XP_019764711.1	PREDICTED: G protein alpha q subunit [Dendroctonus ponderosae] >ENN74482.1 hypothetical protein YQE_08928, partial [Dendroctonus ponderosae] >ERL86487.1 hypothetical protein D910_03891 [Dendroctonus ponderosae]	316	6e-179	1634	99.4	99.7
TRINITY_DN25833_c0_g2	XP_019764387.1	PREDICTED: proteoglycan 4-like [Dendroctonus ponderosae]	75	3.2e-34	381	98.7	98.7
TRINITY_DN21642_c0_g12	XP_013196451.1	PREDICTED: RNA-directed DNA polymerase from mobile element jockey-like [Amyelois transitella]	169	6.3e-25	303	41.4	59.2
TRINITY_DN24545_c0_g3	XP_019757622.1	PREDICTED: von Hippel-Lindau disease tumor suppressor-like [Dendroctonus ponderosae] >ENN78485.1 hypothetical protein YQE_05049, partial [Dendroctonus ponderosae] >ERL87114.1 hypothetical protein D910_04514 [Dendroctonus ponderosae]	171	2.3e-91	880	93.6	98.8
TRINITY_DN6937_c0_g1	XP_004446681.1	beta-glucosidase 1-like, partial [Dasypus novemcinctus]	98	6.1e-09	163	30.6	58.2
TRINITY_DN19818_c0_g3	XP_019765475.1	PREDICTED: uncharacterized protein LOC109541150 isoform X1 [Dendroctonus ponderosae]	29	7.8e-07	143	96.6	96.6
TRINITY_DN21187_c0_g1	CBY13234.1	unnamed protein product, partial [Oikopleura dioica]	58	3.4e-09	165	56.9	67.2
TRINITY_DN17443_c0_g1	XP_019756143.1	PREDICTED: pupal cuticle protein 36-like [Dendroctonus ponderosae]	189	1.9e-51	534	94.2	95.2
TRINITY_DN10001_c0_g2	XP_967723.2	PREDICTED: frequenin-1 [Tribolium castaneum] >EFA00309.1 Frequenin-1-like Protein [Tribolium castaneum]	102	8e-53	542	100	100
TRINITY_DN26667_c0_g1	XP_019769014.1	PREDICTED: uncharacterized protein LOC109543640 isoform X1 [Dendroctonus ponderosae] >XP_019769015.1 PREDICTED: uncharacterized protein LOC109543640 isoform X1 [Dendroctonus ponderosae]	1240	0	5165	80.6	84.4
TRINITY_DN32530_c0_g1	PSN42458.1	hypothetical protein C0J52_18913, partial [Blattella germanica]	97	6.4e-06	137	42.3	55.7
TRINITY_DN12354_c0_g1	XP_019771235.1	PREDICTED: serine proteinase stubble isoform X1 [Dendroctonus ponderosae]	61	6e-30	344	100	100
TRINITY_DN24329_c1_g1	AAC72921.1	putative endonuclease/reverse transcriptase [Lymantria dispar]	65	4.1e-10	173	47.7	67.7
TRINITY_DN24584_c0_g2	ELU04237.1	hypothetical protein CAPTEDRAFT_219878 [Capitella teleta]	49	1.6e-10	179	73.5	85.7
TRINITY_DN31560_c0_g1	ERL83709.1	hypothetical protein D910_00913 [Dendroctonus ponderosae]	90	5.4e-40	430	93.3	95.6
TRINITY_DN21363_c0_g1	ENN81399.1	hypothetical protein YQE_02215, partial [Dendroctonus ponderosae] >ERL83695.1 hypothetical protein D910_00884 [Dendroctonus ponderosae] >ERL92634.1 hypothetical protein D910_09947 [Dendroctonus ponderosae]	161	4.7e-59	600	77.6	85.7
TRINITY_DN9018_c0_g1	ERL89046.1	hypothetical protein D910_06424 [Dendroctonus ponderosae]	101	1.2e-38	421	76.2	86.1
TRINITY_DN26468_c0_g2	ERL93797.1	hypothetical protein D910_11083 [Dendroctonus ponderosae]	352	1.8e-176	1616	93.5	95.7
TRINITY_DN27612_c0_g2	XP_003737705.1	uncharacterized protein K02A2.6-like [Galendromus occidentalis]	81	5.1e-07	149	40.7	63
TRINITY_DN32184_c0_g1	XP_026098301.1	bis(5'-adenosyl)-triphosphatase [Carassius auratus]	153	1.2e-30	352	47.7	65.4
TRINITY_DN26834_c0_g2	XP_019763391.1	PREDICTED: multidrug resistance-associated protein 4-like [Dendroctonus ponderosae]	264	1.3e-128	1199	91.3	92.4
TRINITY_DN34157_c0_g1	XP_005983636.1	PREDICTED: natural resistance-associated macrophage protein 2 homolog [Pantholops hodgsonii] >CDN96504.1 Divalent metal cation transporter MntH [Agrobacterium tumefaciens]	64	2.3e-16	225	75	84.4
TRINITY_DN25889_c1_g1	XP_019762812.1	PREDICTED: ecotropic viral integration site 5 ortholog isoform X3 [Dendroctonus ponderosae]	576	7e-277	2481	98.1	99
TRINITY_DN18363_c0_g2	XP_019762842.1	PREDICTED: pro-resilin-like [Dendroctonus ponderosae] >ENN75572.1 hypothetical protein YQE_07915, partial [Dendroctonus ponderosae]	90	1.2e-45	484	100	100
TRINITY_DN22003_c3_g2	KYN02133.1	hypothetical protein ALC62_07054 [Cyphomyrmex costatus]	49	2.2e-09	167	63.3	77.6
TRINITY_DN18969_c0_g1	XP_019761263.1	PREDICTED: transient receptor potential channel pyrexia-like [Dendroctonus ponderosae]	114	1.4e-50	522	87.7	92.1
TRINITY_DN6076_c0_g1	XP_019769496.1	PREDICTED: uncharacterized transmembrane protein DDB_G0289901 [Dendroctonus ponderosae]	81	2.4e-31	355	87.7	92.6
TRINITY_DN23076_c0_g3	XP_019772836.1	PREDICTED: yrdC domain-containing protein, mitochondrial [Dendroctonus ponderosae] >ENN81859.1 hypothetical protein YQE_01752, partial [Dendroctonus ponderosae]	231	7.2e-116	1091	90.5	93.9
TRINITY_DN26672_c1_g4	XP_027142471.1	H-2 class I histocompatibility antigen, Q9 alpha chain isoform X2 [Larimichthys crocea]	122	1.6e-66	660	100	100
TRINITY_DN188_c0_g1	XP_018568712.1	40S ribosomal protein S10b [Anoplophora glabripennis]	71	1.1e-32	366	100	100
TRINITY_DN23971_c4_g3	ENN75776.1	hypothetical protein YQE_07733, partial [Dendroctonus ponderosae]	270	4.6e-150	1388	95.2	96.3
TRINITY_DN23156_c0_g10	XP_019761437.1	PREDICTED: 60S ribosomal protein L13 [Dendroctonus ponderosae] >AEE62125.1 unknown [Dendroctonus ponderosae]	220	2.7e-110	1040	95	96.8
TRINITY_DN20713_c1_g1	GBP01374.1	Uncharacterized amino-acid ABC transporter ATP-binding protein YhdZ [Eumeta japonica]	95	2.4e-09	167	47.4	50.5
TRINITY_DN19209_c0_g1	XP_019766204.1	PREDICTED: chaoptin-like [Dendroctonus ponderosae]	273	6.2e-55	565	93.8	94.1
TRINITY_DN25386_c0_g2	ENN80837.1	hypothetical protein YQE_02744, partial [Dendroctonus ponderosae]	90	7.8e-30	349	81.1	83.3
TRINITY_DN24228_c3_g7	ENN74487.1	hypothetical protein YQE_08932, partial [Dendroctonus ponderosae]	467	2.2e-211	1915	90.1	93.1
TRINITY_DN20228_c0_g2	ERL93410.1	hypothetical protein D910_10702 [Dendroctonus ponderosae]	243	7.1e-130	1210	95.9	97.9
TRINITY_DN25525_c0_g2	XP_019754659.1	PREDICTED: XK-related protein 4-like [Dendroctonus ponderosae] >XP_019765270.1 PREDICTED: XK-related protein 4-like [Dendroctonus ponderosae] >AEE63441.1 unknown [Dendroctonus ponderosae] >ENN82734.1 hypothetical protein YQE_00898, partial [Dendroctonus ponderosae] >ENN83336.1 hypothetical protein YQE_00305, partial [Dendroctonus ponderosae] >ERL95923.1 hypothetical protein D910_00603 [Dendrocton…	399	4.5e-224	2024	99.5	99.7
TRINITY_DN7193_c0_g2	XP_017490976.1	PREDICTED: alpha-crystallin A chain-like [Rhagoletis zephyria]	94	1.1e-07	152	36.2	57.4
TRINITY_DN23268_c0_g1	XP_019772555.1	PREDICTED: uncharacterized protein LOC109546157 [Dendroctonus ponderosae]	183	6.2e-72	710	81.4	87.4
TRINITY_DN27643_c2_g3	ENN72339.1	hypothetical protein YQE_10974, partial [Dendroctonus ponderosae]	72	7.3e-27	317	95.8	97.2
TRINITY_DN23284_c1_g1	XP_019755967.1	PREDICTED: zinc transporter ZIP1 isoform X1 [Dendroctonus ponderosae]	352	1.1e-167	1538	91.5	94.3
TRINITY_DN27641_c3_g1	XP_019762554.1	PREDICTED: uncharacterized protein LOC109539319 isoform X2 [Dendroctonus ponderosae]	111	3.5e-41	441	79.3	82.9
TRINITY_DN15380_c0_g1	XP_016968439.1	PREDICTED: probable NADP-dependent mannitol dehydrogenase [Drosophila biarmipes] >CAY86680.1 EC1118_1O4_6612p [Saccharomyces cerevisiae EC1118] >EGA80320.1 hypothetical protein QA23_5135 [Saccharomyces cerevisiae Lalvin QA23] >EWG87944.1 hypothetical protein P301_O30031 [Saccharomyces cerevisiae P301] >CEP25286.1 conserved hypothetical protein [Torulaspora microellipsoides]	97	7.5e-24	291	51.5	76.3
TRINITY_DN15526_c0_g3	XP_023311604.1	chondroitin sulfate N-acetylgalactosaminyltransferase 2 [Anoplophora glabripennis]	72	8.2e-08	154	55.6	73.6
TRINITY_DN26142_c0_g3	XP_021180766.1	LOW QUALITY PROTEIN: uncharacterized protein LOC110369601 [Helicoverpa armigera]	156	3.7e-12	193	36.5	49.4
TRINITY_DN24825_c0_g8	XP_019763695.1	PREDICTED: uncharacterized protein LOC109540012 [Dendroctonus ponderosae]	85	6.8e-33	374	88.2	94.1
TRINITY_DN22861_c1_g4	ERL93509.1	hypothetical protein D910_10798 [Dendroctonus ponderosae]	73	1.3e-18	246	58.9	76.7
TRINITY_DN23283_c2_g1	ERL84090.1	hypothetical protein D910_01427 [Dendroctonus ponderosae] >ERL84096.1 hypothetical protein D910_01433 [Dendroctonus ponderosae]	671	1.1e-237	2144	65.6	67.8
TRINITY_DN25602_c2_g1	XP_019754350.1	PREDICTED: probable cytochrome P450 49a1 isoform X2 [Dendroctonus ponderosae]	526	1.3e-294	2638	94.1	97.1
TRINITY_DN21843_c0_g5	XP_028129981.1	uncharacterized protein LOC114326008 isoform X1 [Diabrotica virgifera virgifera]	86	5.4e-08	155	45.3	59.3
TRINITY_DN13431_c0_g5	EFX70812.1	hypothetical protein DAPPUDRAFT_309281 [Daphnia pulex]	78	2.6e-19	251	64.1	76.9
TRINITY_DN20299_c2_g1	XP_022910336.1	zinc finger BED domain-containing protein 1-like [Onthophagus taurus]	94	4.9e-22	280	58.5	75.5
TRINITY_DN26048_c0_g1	XP_019753419.1	PREDICTED: serine/threonine-protein kinase ULK3-like [Dendroctonus ponderosae] >XP_019753420.1 PREDICTED: serine/threonine-protein kinase ULK3-like [Dendroctonus ponderosae] >XP_019753421.1 PREDICTED: serine/threonine-protein kinase ULK3-like [Dendroctonus ponderosae] >XP_019753422.1 PREDICTED: serine/threonine-protein kinase ULK3-like [Dendroctonus ponderosae] >ENN81206.1 hypothetical protein YQ…	375	1.4e-183	1678	84	90.7
TRINITY_DN23777_c1_g1	XP_019769018.1	PREDICTED: uncharacterized protein LOC109543643 isoform X1 [Dendroctonus ponderosae]	1690	0	7514	89.9	92.8
TRINITY_DN20647_c1_g5	XP_019756417.1	PREDICTED: gustatory receptor for sugar taste 64e-like [Dendroctonus ponderosae]	89	9e-40	428	98.9	100
TRINITY_DN26614_c0_g5	XP_019773349.1	PREDICTED: methylcrotonoyl-CoA carboxylase subunit alpha, mitochondrial [Dendroctonus ponderosae]	114	1.9e-50	521	88.6	94.7
TRINITY_DN20522_c0_g1	XP_019755294.1	PREDICTED: uncharacterized protein LOC109534159 [Dendroctonus ponderosae]	232	1.4e-88	856	75.4	76.7
TRINITY_DN24995_c0_g1	XP_019765109.1	PREDICTED: dual serine/threonine and tyrosine protein kinase-like isoform X1 [Dendroctonus ponderosae]	918	0	4541	95.3	98.1
TRINITY_DN23281_c0_g2	ERL88187.1	hypothetical protein D910_05575 [Dendroctonus ponderosae]	541	1e-278	2497	97.6	98.7
TRINITY_DN24560_c0_g2	ENN70335.1	hypothetical protein YQE_12844, partial [Dendroctonus ponderosae]	400	2.4e-214	1944	96.8	98.8
TRINITY_DN25837_c0_g1	ENN79710.1	hypothetical protein YQE_03767, partial [Dendroctonus ponderosae]	882	0	4243	98	98.6
TRINITY_DN33435_c0_g1	ENN76795.1	hypothetical protein YQE_06636, partial [Dendroctonus ponderosae] >ERL94718.1 hypothetical protein D910_11992 [Dendroctonus ponderosae]	73	4.4e-34	379	98.6	98.6
TRINITY_DN23441_c0_g1	XP_019772961.1	PREDICTED: choline/ethanolamine kinase [Dendroctonus ponderosae]	306	1.4e-173	1591	96.1	98
TRINITY_DN25738_c0_g5	AEE62258.1	unknown [Dendroctonus ponderosae]	246	3.2e-76	748	66.3	66.7
TRINITY_DN21298_c0_g1	XP_019754495.1	PREDICTED: mitochondrial import inner membrane translocase subunit TIM44 [Dendroctonus ponderosae] >ENN80512.1 hypothetical protein YQE_03069, partial [Dendroctonus ponderosae]	422	3.5e-228	2060	96.2	99.1
TRINITY_DN19629_c1_g2	XP_019754636.1	PREDICTED: chromobox protein homolog 3-like [Dendroctonus ponderosae] >AEE61440.1 unknown [Dendroctonus ponderosae] >ENN80416.1 hypothetical protein YQE_03164, partial [Dendroctonus ponderosae] >ERL88967.1 hypothetical protein D910_06345 [Dendroctonus ponderosae]	69	2.6e-26	319	91.3	95.7
TRINITY_DN25057_c1_g1	AEE62989.1	unknown [Dendroctonus ponderosae]	223	8.1e-116	1094	99.6	100
TRINITY_DN24963_c1_g1	XP_019772140.1	PREDICTED: lysocardiolipin acyltransferase 1-like, partial [Dendroctonus ponderosae]	184	4.7e-93	896	91.8	95.7
TRINITY_DN20334_c0_g1	XP_019769717.1	PREDICTED: TNF receptor-associated factor 5-like [Dendroctonus ponderosae]	257	1.6e-134	1252	96.5	98.4
TRINITY_DN26301_c0_g4	XP_019755700.1	PREDICTED: anamorsin homolog [Dendroctonus ponderosae] >ENN79730.1 hypothetical protein YQE_03786, partial [Dendroctonus ponderosae] >ERL88344.1 hypothetical protein D910_05731 [Dendroctonus ponderosae]	37	7.7e-14	209	100	100
TRINITY_DN26203_c0_g1	ENN79449.1	hypothetical protein YQE_04093, partial [Dendroctonus ponderosae]	503	1.6e-175	1606	66.6	70.8
TRINITY_DN24106_c0_g2	XP_019760895.1	PREDICTED: gastrula zinc finger protein XlCGF57.1-like [Dendroctonus ponderosae]	179	1.6e-84	822	92.2	96.1
TRINITY_DN19785_c2_g4	NP_505371.2	Phosphate transporter [Caenorhabditis elegans] >CCD61416.1 Phosphate transporter [Caenorhabditis elegans]	29	7.4e-06	137	89.7	100
TRINITY_DN27286_c0_g1	VDK53362.1	unnamed protein product [Anisakis simplex]	113	9.2e-31	359	62.8	72.6
TRINITY_DN19880_c0_g5	ENN79172.1	hypothetical protein YQE_04356, partial [Dendroctonus ponderosae] >ERL86283.1 hypothetical protein D910_03692 [Dendroctonus ponderosae]	118	5.3e-64	638	99.2	99.2
TRINITY_DN33661_c0_g1	XP_019758599.1	PREDICTED: uncharacterized protein LOC109536710 [Dendroctonus ponderosae] >ENN77876.1 hypothetical protein YQE_05554, partial [Dendroctonus ponderosae] >ERL96238.1 hypothetical protein D910_01526 [Dendroctonus ponderosae]	206	2.6e-106	1005	96.1	98.1
TRINITY_DN22100_c5_g4	XP_026494154.1	uncharacterized protein LOC113399276 [Vanessa tameamea]	47	1.7e-08	161	55.3	80.9
TRINITY_DN27687_c5_g1	XP_019766605.1	PREDICTED: tetratricopeptide repeat protein 37 [Dendroctonus ponderosae]	1058	0	4271	79.4	83
TRINITY_DN19642_c0_g1	XP_019761732.1	PREDICTED: DNA-directed RNA polymerase II subunit RPB1 [Dendroctonus ponderosae]	304	2.7e-80	784	65.5	68.1
TRINITY_DN25670_c0_g1	XP_019772334.1	PREDICTED: uncharacterized protein LOC109545934 isoform X1 [Dendroctonus ponderosae]	1024	0	4040	96.4	97.5
TRINITY_DN17502_c0_g2	XP_005478019.1	cyclin-dependent kinase 17 isoform X1 [Oreochromis niloticus] >XP_005478020.1 cyclin-dependent kinase 17 isoform X1 [Oreochromis niloticus] >XP_005478021.1 cyclin-dependent kinase 17 isoform X1 [Oreochromis niloticus] >XP_019205287.1 cyclin-dependent kinase 17 isoform X1 [Oreochromis niloticus] >XP_025757158.1 cyclin-dependent kinase 17 isoform X1 [Oreochromis niloticus]	293	9.6e-98	935	61.8	78.2
TRINITY_DN26378_c1_g1	XP_019755223.1	PREDICTED: two pore potassium channel protein sup-9 isoform X1 [Dendroctonus ponderosae]	297	2.5e-148	1373	91.9	92.3
TRINITY_DN25367_c0_g1	XP_019766556.1	PREDICTED: cyclin-C [Dendroctonus ponderosae] >ENN73419.1 hypothetical protein YQE_09981, partial [Dendroctonus ponderosae] >ERL93326.1 hypothetical protein D910_10620 [Dendroctonus ponderosae]	266	2e-150	1396	99.2	99.6
TRINITY_DN24226_c0_g1	XP_019766246.1	PREDICTED: uncharacterized protein LOC109541752 [Dendroctonus ponderosae] >ENN73617.1 hypothetical protein YQE_09864, partial [Dendroctonus ponderosae]	194	6.1e-86	832	86.6	89.7
TRINITY_DN21304_c0_g3	XP_008200552.1	PREDICTED: uncharacterized protein LOC103314959 isoform X4 [Tribolium castaneum] >XP_015840490.1 PREDICTED: uncharacterized protein LOC107399213 isoform X4 [Tribolium castaneum] >XP_015833297.1 PREDICTED: uncharacterized protein LOC103314955 isoform X4 [Tribolium castaneum] >XP_015834546.1 PREDICTED: uncharacterized protein LOC107397754 isoform X4 [Tribolium castaneum] >XP_015834550.1 PREDICTED: …	85	2.2e-17	240	56.5	75.3
TRINITY_DN8392_c0_g1	XP_019753815.1	PREDICTED: girdin-like [Dendroctonus ponderosae]	50	3.5e-16	224	94	100
TRINITY_DN24549_c0_g2	ERL85796.1	hypothetical protein D910_03211 [Dendroctonus ponderosae]	519	4.4e-233	2102	85	88.4
TRINITY_DN32223_c0_g1	XP_014446482.1	dual specificity protein phosphatase 5 [Tupaia chinensis]	82	8.4e-32	359	82.9	86.6
TRINITY_DN25341_c0_g4	PZC75698.1	hypothetical protein B5X24_HaOG205730 [Helicoverpa armigera]	147	8.2e-13	197	33.3	55.1
TRINITY_DN23245_c1_g2	XP_022208026.1	piggyBac transposable element-derived protein 3-like [Nilaparvata lugens]	164	2.1e-19	257	39	52.4
TRINITY_DN11698_c0_g1	GBP02255.1	50S ribosomal protein L1 [Eumeta japonica]	68	1.3e-19	253	66.2	86.8
TRINITY_DN14388_c0_g1	XP_022167348.1	uncharacterized protein LOC111031627 [Myzus persicae] >XP_022160607.1 uncharacterized protein LOC111026780 [Myzus persicae] >XP_022163634.1 uncharacterized protein LOC111029091 [Myzus persicae] >XP_022168059.1 uncharacterized protein LOC111032138 [Myzus persicae]	49	3.7e-06	138	53.1	61.2
TRINITY_DN19916_c0_g1	XP_019759868.1	PREDICTED: UDP-glucuronic acid decarboxylase 1 [Dendroctonus ponderosae] >AEE61869.1 unknown [Dendroctonus ponderosae] >ENN77320.1 hypothetical protein YQE_06146, partial [Dendroctonus ponderosae]	419	1.7e-240	2166	98.6	98.8
TRINITY_DN27127_c1_g4	XP_019762654.1	PREDICTED: uncharacterized protein LOC109539383 isoform X1 [Dendroctonus ponderosae]	159	2.6e-89	859	97.5	98.1
TRINITY_DN24070_c1_g17	RTG83560.1	uncharacterized protein DC041_0006098 [Schistosoma bovis]	88	4.1e-29	337	70.5	79.5
TRINITY_DN25225_c0_g2	XP_019766273.1	PREDICTED: ubiquitin-conjugating enzyme E2-22 kDa [Dendroctonus ponderosae] >ENN73582.1 hypothetical protein YQE_09830, partial [Dendroctonus ponderosae] >ERL85603.1 hypothetical protein D910_03022 [Dendroctonus ponderosae]	179	8.3e-99	943	98.9	100
TRINITY_DN27159_c0_g2	ERL86511.1	hypothetical protein D910_03915 [Dendroctonus ponderosae]	134	3.3e-65	651	93.3	95.5
TRINITY_DN23270_c0_g4	ERL87801.1	hypothetical protein D910_05190 [Dendroctonus ponderosae]	374	1.4e-198	1803	93	96.3
TRINITY_DN21597_c1_g6	ENN71138.1	hypothetical protein YQE_12069, partial [Dendroctonus ponderosae]	333	2.8e-170	1559	91	94
TRINITY_DN25100_c1_g5	KMQ86419.1	reverse transcriptase [Lasius niger]	165	3.4e-26	316	43.6	63.6
TRINITY_DN25708_c0_g1	XP_019772941.1	PREDICTED: uncharacterized protein LOC109546424 [Dendroctonus ponderosae]	206	1.3e-51	535	58.3	68.4
TRINITY_DN25110_c0_g3	XP_019760810.1	PREDICTED: uncharacterized protein LOC109538154 [Dendroctonus ponderosae]	193	2.3e-82	801	81.9	88.1
TRINITY_DN27310_c0_g1	KMQ83546.1	transposase-like protein [Lasius niger]	90	8.3e-27	321	63.3	71.1
TRINITY_DN22915_c0_g2	XP_019762547.1	PREDICTED: lysosome membrane protein 2-like isoform X2 [Dendroctonus ponderosae]	329	3.7e-178	1629	92.1	96.4
TRINITY_DN21719_c0_g2	XP_019766189.1	PREDICTED: longitudinals lacking protein, isoforms H/M/V isoform X4 [Dendroctonus ponderosae]	357	1.5e-73	728	96.4	97.5
TRINITY_DN21523_c3_g1	XP_019764277.1	PREDICTED: uncharacterized protein LOC109540362 [Dendroctonus ponderosae]	949	7.2e-247	2223	49.5	65.1
TRINITY_DN22581_c0_g3	XP_019764647.1	PREDICTED: uncharacterized protein LOC109540650 [Dendroctonus ponderosae]	203	6.3e-105	998	92.6	96.6
TRINITY_DN20032_c0_g2	XP_019757140.1	PREDICTED: CD63 antigen-like [Dendroctonus ponderosae]	224	4.6e-118	1109	98.2	99.6
TRINITY_DN26393_c1_g2	XP_018570333.1	uncharacterized protein LOC108910260 isoform X2 [Anoplophora glabripennis]	1008	3.6e-236	2131	54.5	66.8
TRINITY_DN22850_c0_g3	ERL86225.1	hypothetical protein D910_03636 [Dendroctonus ponderosae]	414	8.8e-180	1645	96.9	97.3
TRINITY_DN26070_c0_g3	XP_019754100.1	PREDICTED: chromobox protein homolog 1-like isoform X2 [Dendroctonus ponderosae]	165	4e-89	856	98.8	99.4
TRINITY_DN28056_c0_g1	XP_017502908.1	PREDICTED: error-prone DNA polymerase-like [Manis javanica]	44	4.3e-09	163	68.2	72.7
TRINITY_DN26273_c0_g1	XP_019761045.1	PREDICTED: monocarboxylate transporter 10-like [Dendroctonus ponderosae] >XP_019761046.1 PREDICTED: monocarboxylate transporter 10-like [Dendroctonus ponderosae] >XP_019761047.1 PREDICTED: monocarboxylate transporter 10-like [Dendroctonus ponderosae]	812	0	3700	93.2	95.4
TRINITY_DN22393_c0_g3	XP_019766699.1	PREDICTED: transcription cofactor vestigial-like protein 4 isoform X1 [Dendroctonus ponderosae]	49	3.5e-13	200	89.8	93.9
TRINITY_DN14340_c0_g1	VDK55200.1	unnamed protein product [Anisakis simplex]	55	2.3e-19	252	80	90.9
TRINITY_DN23634_c1_g2	XP_019754805.1	PREDICTED: leucine-rich repeats and immunoglobulin-like domains protein 3 [Dendroctonus ponderosae]	729	9.8e-311	2777	97.8	98.9
TRINITY_DN19218_c0_g1	ENN76714.1	hypothetical protein YQE_06779, partial [Dendroctonus ponderosae]	250	2.4e-39	430	64	76.4
TRINITY_DN23290_c0_g1	XP_019881124.1	PREDICTED: longitudinals lacking protein, isoforms H/M/V isoform X9 [Aethina tumida]	127	1e-20	274	47.2	55.1
TRINITY_DN10358_c0_g1	XP_019771047.1	PREDICTED: adenosine receptor A2b-like [Dendroctonus ponderosae]	66	8.3e-22	274	95.5	97
TRINITY_DN22221_c0_g1	ENN73745.1	hypothetical protein YQE_09641, partial [Dendroctonus ponderosae]	34	1.7e-06	147	79.4	85.3
TRINITY_DN22563_c2_g1	ACT35690.1	cathepsin L-like cysteine proteinase [Ditylenchus destructor]	278	2.6e-87	843	60.4	75.9
TRINITY_DN24703_c0_g2	XP_019770721.1	PREDICTED: poly(A) polymerase type 3 [Dendroctonus ponderosae] >ENN70907.1 hypothetical protein YQE_12311, partial [Dendroctonus ponderosae]	595	5.1e-279	2500	82.5	87.7
TRINITY_DN22950_c0_g1	ERL94511.1	hypothetical protein D910_11788 [Dendroctonus ponderosae]	544	2.1e-255	2296	82.5	88.6
TRINITY_DN26796_c0_g2	XP_019753404.1	PREDICTED: arf-GAP with SH3 domain, ANK repeat and PH domain-containing protein 2 isoform X2 [Dendroctonus ponderosae]	974	0	4759	98.5	98.7
TRINITY_DN24502_c0_g2	XP_015837000.1	PREDICTED: neurexin-1 [Tribolium castaneum]	1314	0	5114	75	83.8
TRINITY_DN31240_c0_g1	AAH03896.2	Rpl17 protein, partial [Mus musculus]	87	2.6e-44	467	100	100
TRINITY_DN11453_c0_g2	XP_019773430.1	PREDICTED: zinc finger protein DZIP1 [Dendroctonus ponderosae]	186	4.4e-65	649	79	87.6
TRINITY_DN16948_c0_g1	ERL93580.1	hypothetical protein D910_10868 [Dendroctonus ponderosae]	249	2.2e-134	1248	94.4	98.4
TRINITY_DN2376_c0_g1	VDN05437.1	unnamed protein product [Thelazia callipaeda]	77	2.6e-16	226	59.7	81.8
TRINITY_DN22269_c0_g1	AEE62326.1	unknown [Dendroctonus ponderosae]	518	9.1e-277	2479	95.6	98.3
TRINITY_DN23153_c1_g3	XP_019765664.1	PREDICTED: myotrophin [Dendroctonus ponderosae] >ENN74008.1 hypothetical protein YQE_09398, partial [Dendroctonus ponderosae]	56	1.4e-22	287	94.6	100
TRINITY_DN26787_c0_g1	XP_019766345.1	PREDICTED: uncharacterized protein LOC109541812 isoform X2 [Dendroctonus ponderosae]	445	3.2e-254	2285	97.8	98.9
TRINITY_DN33765_c0_g1	XP_024267601.1	uncharacterized protein LOC112244072, partial [Oncorhynchus tshawytscha]	60	7.1e-08	153	53.3	73.3
TRINITY_DN20892_c1_g4	XP_018565377.1	putative nuclease HARBI1 [Anoplophora glabripennis] >XP_023310356.1 putative nuclease HARBI1 [Anoplophora glabripennis] >XP_023310857.1 putative nuclease HARBI1 [Anoplophora glabripennis] >XP_023311032.1 putative nuclease HARBI1 [Anoplophora glabripennis] >XP_023312668.1 putative nuclease HARBI1 [Anoplophora glabripennis]	121	1.4e-26	317	45.5	62.8
TRINITY_DN20972_c0_g2	XP_019766628.1	PREDICTED: LOW QUALITY PROTEIN: protein FAM114A2-like [Dendroctonus ponderosae]	532	1.8e-226	2046	85.9	88.9
TRINITY_DN16531_c0_g1	XP_019761313.1	PREDICTED: uncharacterized protein LOC109538504 [Dendroctonus ponderosae] >ENN76346.1 hypothetical protein YQE_07123, partial [Dendroctonus ponderosae]	347	2.7e-154	1421	81.8	87.3
TRINITY_DN21701_c0_g2	XP_019771587.1	PREDICTED: uncharacterized protein LOC109545365 isoform X1 [Dendroctonus ponderosae] >ENN70569.1 hypothetical protein YQE_12744, partial [Dendroctonus ponderosae]	124	2e-50	525	82.3	88.7
TRINITY_DN21956_c0_g7	XP_019757407.1	PREDICTED: facilitated trehalose transporter Tret1-like isoform X2 [Dendroctonus ponderosae]	493	1.1e-254	2289	92.7	97
TRINITY_DN26786_c0_g2	ERL88972.1	hypothetical protein D910_06350 [Dendroctonus ponderosae]	503	5e-270	2425	98.2	99
TRINITY_DN26694_c0_g2	ERL95276.1	hypothetical protein D910_12542 [Dendroctonus ponderosae]	91	1.8e-14	214	41.8	68.1
TRINITY_DN21582_c0_g2	XP_019762857.1	PREDICTED: F-box only protein 9 [Dendroctonus ponderosae]	446	7.3e-241	2169	94.6	96.2
TRINITY_DN25800_c0_g2	XP_019766926.1	PREDICTED: sialin-like [Dendroctonus ponderosae] >ENN73149.1 hypothetical protein YQE_10204, partial [Dendroctonus ponderosae]	45	1e-11	191	86.7	93.3
TRINITY_DN2859_c0_g1	XP_017480217.1	PREDICTED: mothers against decapentaplegic homolog 4-like [Rhagoletis zephyria]	40	6.8e-13	197	95	95
TRINITY_DN26093_c0_g1	XP_019765162.1	PREDICTED: uncharacterized protein LOC109540990 isoform X1 [Dendroctonus ponderosae] >XP_019765163.1 PREDICTED: uncharacterized protein LOC109540990 isoform X1 [Dendroctonus ponderosae] >XP_019765164.1 PREDICTED: uncharacterized protein LOC109540990 isoform X1 [Dendroctonus ponderosae] >ENN74189.1 hypothetical protein YQE_09162, partial [Dendroctonus ponderosae]	748	0	3092	96.7	97.9
TRINITY_DN20980_c0_g3	ENN72985.1	hypothetical protein YQE_10391, partial [Dendroctonus ponderosae] >ERL92732.1 hypothetical protein D910_10042 [Dendroctonus ponderosae]	72	1.2e-34	390	94.4	98.6
TRINITY_DN18677_c0_g1	ENN72484.1	hypothetical protein YQE_10825, partial [Dendroctonus ponderosae]	269	1e-110	1046	81.4	87.4
TRINITY_DN8788_c0_g1	ERL88325.1	hypothetical protein D910_05712 [Dendroctonus ponderosae]	164	6.5e-87	838	97.6	98.2
TRINITY_DN29317_c0_g1	XP_011346784.1	thioredoxin-2 [Ooceraea biroi] >RLU26353.1 hypothetical protein DMN91_000147 [Ooceraea biroi]	105	2e-18	245	41	65.7
TRINITY_DN27643_c0_g1	ERL91062.1	hypothetical protein D910_08404 [Dendroctonus ponderosae]	77	4.9e-23	283	77.9	84.4
TRINITY_DN32018_c0_g1	BAC30840.1	unnamed protein product [Mus musculus]	43	2.3e-06	139	65.1	83.7
TRINITY_DN648_c0_g1	XP_009022208.1	hypothetical protein HELRODRAFT_185809 [Helobdella robusta] >ESN99868.1 hypothetical protein HELRODRAFT_185809 [Helobdella robusta]	71	9.4e-24	289	78.9	85.9
TRINITY_DN25372_c0_g2	NP_001079672.1	tubulin beta 4A class IVa S homeolog [Xenopus laevis] >AAH46853.1 MGC53205 protein [Xenopus laevis] >OCT59411.1 hypothetical protein XELAEV_18000833mg [Xenopus laevis]	73	3.8e-36	396	100	100
TRINITY_DN23899_c0_g1	XP_019767932.1	PREDICTED: golgin subfamily A member 6-like protein 22 isoform X1 [Dendroctonus ponderosae] >ENN72569.1 hypothetical protein YQE_10794, partial [Dendroctonus ponderosae]	326	2.1e-128	1199	78.5	83.1
TRINITY_DN21176_c0_g6	KYB27839.1	hypothetical protein TcasGA2_TC032755 [Tribolium castaneum]	196	1.8e-48	506	90.8	92.9
TRINITY_DN24370_c0_g1	ENN77932.1	hypothetical protein YQE_05609, partial [Dendroctonus ponderosae]	315	7.7e-169	1550	93.7	96.8
TRINITY_DN22382_c2_g1	ERL94814.1	hypothetical protein D910_12088 [Dendroctonus ponderosae]	634	0	3032	90.5	93.7
TRINITY_DN22699_c0_g3	XP_003113338.1	hypothetical protein CRE_25249 [Caenorhabditis remanei] >EFP09592.1 hypothetical protein CRE_25249 [Caenorhabditis remanei] >OZF86220.1 hypothetical protein FL82_15123, partial [Caenorhabditis remanei] >POM40494.1 hypothetical protein FL81_13227 [Caenorhabditis remanei]	49	1.1e-08	162	73.5	81.6
TRINITY_DN18368_c0_g1	ERL85664.1	hypothetical protein D910_03081 [Dendroctonus ponderosae]	38	7.4e-07	150	84.2	84.2
TRINITY_DN27064_c0_g3	XP_019768189.1	PREDICTED: fasciclin-2 [Dendroctonus ponderosae]	731	0	3812	97.4	98.5
TRINITY_DN27452_c2_g1	XP_019754658.1	PREDICTED: MDS1 and EVI1 complex locus protein EVI1-A-like [Dendroctonus ponderosae]	722	3.2e-199	1815	57.5	59.7
TRINITY_DN25095_c0_g2	ENN78801.1	hypothetical protein YQE_04738, partial [Dendroctonus ponderosae]	660	9.5e-178	1628	73.2	74.8
TRINITY_DN20996_c3_g5	KXJ62492.1	hypothetical protein RP20_CCG006676 [Aedes albopictus]	92	1.8e-11	184	44.6	60.9
TRINITY_DN14803_c0_g2	XP_019289348.1	PREDICTED: GTP-binding nuclear protein Ran [Panthera pardus]	204	2.3e-110	1040	94.6	96.6
TRINITY_DN1817_c0_g1	XP_018572162.1	triosephosphate isomerase [Anoplophora glabripennis]	81	2.2e-19	252	60.5	72.8
TRINITY_DN26475_c0_g1	XP_019769073.1	PREDICTED: AF4/FMR2 family member 4 [Dendroctonus ponderosae]	850	5.2e-238	2149	78.4	81.9
TRINITY_DN25831_c0_g1	XP_019761618.1	PREDICTED: uncharacterized MFS-type transporter C09D4.1 [Dendroctonus ponderosae] >XP_019761619.1 PREDICTED: uncharacterized MFS-type transporter C09D4.1 [Dendroctonus ponderosae] >XP_019761620.1 PREDICTED: uncharacterized MFS-type transporter C09D4.1 [Dendroctonus ponderosae]	443	5.9e-201	1827	93.5	94.6
TRINITY_DN18177_c0_g3	AGT99002.1	immunoglobulin M heavy chain [Lateolabrax japonicus]	235	4.7e-136	1262	99.1	99.6
TRINITY_DN14288_c0_g1	XP_019764104.1	PREDICTED: protein D2-like isoform X1 [Dendroctonus ponderosae] >ENN74880.1 hypothetical protein YQE_08545, partial [Dendroctonus ponderosae]	205	2.7e-109	1031	92.7	98
TRINITY_DN20178_c0_g1	ENN74747.1	hypothetical protein YQE_08685, partial [Dendroctonus ponderosae]	76	2.5e-18	245	61.8	73.7
TRINITY_DN18867_c0_g2	AKA66318.1	MHC II invariant chain [Siniperca chuatsi]	81	5.3e-29	335	85.2	93.8
TRINITY_DN26275_c0_g2	XP_019767811.1	PREDICTED: 39S ribosomal protein L32, mitochondrial isoform X2 [Dendroctonus ponderosae]	203	2.2e-108	1025	95.1	99.5
TRINITY_DN25210_c0_g1	XP_019754283.1	PREDICTED: uncharacterized protein LOC109533413 [Dendroctonus ponderosae]	734	2.4e-281	2521	99.2	99.2
TRINITY_DN21250_c0_g1	ERL93102.1	hypothetical protein D910_10404 [Dendroctonus ponderosae]	705	0	3335	88.7	91.6
TRINITY_DN12659_c0_g3	P30946.2	RecName: Full=Heat shock protein HSP 90-alpha	111	5.6e-39	422	86.5	88.3
TRINITY_DN26191_c0_g3	Q03275.2	RecName: Full=Retrovirus-related Pol polyprotein from type-1 retrotransposable element R2; AltName: Full=Retrovirus-related Pol polyprotein from type I retrotransposable element R2; Includes: RecName: Full=Reverse transcriptase; Includes: RecName: Full=Endonuclease >AAB66358.1 reverse transcriptase, partial [Popillia japonica]	51	4.8e-09	164	58.8	66.7
TRINITY_DN24027_c0_g3	XP_019764594.1	PREDICTED: thrombospondin type-1 domain-containing protein 4 [Dendroctonus ponderosae]	690	0	3700	97.1	98.3
TRINITY_DN26535_c1_g3	XP_019756957.1	PREDICTED: zinc finger CCCH domain-containing protein 11A-like [Dendroctonus ponderosae]	158	2.7e-64	648	74.1	81
TRINITY_DN23569_c0_g1	XP_019756890.1	PREDICTED: endoplasmic reticulum-Golgi intermediate compartment protein 2 [Dendroctonus ponderosae] >AEE61769.1 unknown [Dendroctonus ponderosae] >ENN79004.1 hypothetical protein YQE_04555, partial [Dendroctonus ponderosae]	288	1e-155	1435	92.4	95.5
TRINITY_DN23802_c0_g2	XP_019757464.1	PREDICTED: leucine-rich repeat-containing protein 4B-like [Dendroctonus ponderosae]	287	5.9e-56	573	92.3	94.1
TRINITY_DN20906_c1_g8	ENN77920.1	hypothetical protein YQE_05597, partial [Dendroctonus ponderosae]	290	6.2e-165	1518	96.9	99
TRINITY_DN17671_c0_g1	AKK25142.1	odorant binding protein 18 [Dendroctonus ponderosae]	141	7.4e-76	742	100	100
TRINITY_DN18516_c0_g1	XP_019763559.1	PREDICTED: sialin-like isoform X1 [Dendroctonus ponderosae]	477	2.2e-266	2389	96.6	98.5
TRINITY_DN22733_c0_g1	XP_019761184.1	PREDICTED: uncharacterized protein LOC109538405 [Dendroctonus ponderosae] >ENN76414.1 hypothetical protein YQE_07075, partial [Dendroctonus ponderosae] >ERL94098.1 hypothetical protein D910_11380 [Dendroctonus ponderosae]	123	4.7e-59	599	94.3	96.7
TRINITY_DN23899_c0_g7	ENN78765.1	hypothetical protein YQE_04777, partial [Dendroctonus ponderosae]	51	2.8e-18	245	98	98
TRINITY_DN23345_c1_g6	XP_015429411.1	PREDICTED: tigger transposable element-derived protein 1-like [Dufourea novaeangliae]	33	3.5e-06	139	87.9	90.9
TRINITY_DN23503_c1_g1	XP_019881155.1	PREDICTED: longitudinals lacking protein, isoforms A/B/D/L isoform X39 [Aethina tumida]	55	1.2e-12	202	61.8	80
TRINITY_DN20148_c0_g3	XP_026313142.1	calmodulin-3 isoform X1 [Piliocolobus tephrosceles]	41	6.1e-14	205	100	100
TRINITY_DN19073_c0_g2	ENN80532.1	hypothetical protein YQE_03043, partial [Dendroctonus ponderosae]	99	5.2e-36	396	85.9	86.9
TRINITY_DN20084_c0_g1	XP_019762032.1	PREDICTED: odorant receptor 4-like isoform X1 [Dendroctonus ponderosae]	157	2.4e-33	381	58	63.1
TRINITY_DN23233_c0_g1	ERL89005.1	hypothetical protein D910_06383 [Dendroctonus ponderosae]	231	2e-114	1084	96.5	97.8
TRINITY_DN21191_c0_g4	XP_019769649.1	PREDICTED: serine protease 42-like [Dendroctonus ponderosae]	35	3.4e-11	186	100	100
TRINITY_DN25925_c0_g5	AYN64428.1	carboxylesterase [Dendroctonus armandi]	120	9.9e-42	446	70.8	84.2
TRINITY_DN20263_c0_g2	XP_019766737.1	PREDICTED: facilitated trehalose transporter Tret1-like [Dendroctonus ponderosae]	574	3e-295	2639	93	96.2
TRINITY_DN23429_c0_g2	XP_019763561.1	PREDICTED: facilitated trehalose transporter Tret1-like isoform X1 [Dendroctonus ponderosae]	473	8.6e-254	2281	97.9	99.6
TRINITY_DN25935_c0_g1	ERL88097.1	hypothetical protein D910_05486 [Dendroctonus ponderosae]	684	0	2879	88.5	90.6
TRINITY_DN17177_c0_g1	XP_019757866.1	PREDICTED: organic cation/carnitine transporter 7-like isoform X2 [Dendroctonus ponderosae]	131	1.5e-60	609	91.6	95.4
TRINITY_DN21249_c0_g3	XP_019759649.1	PREDICTED: polyhomeotic-proximal chromatin protein-like isoform X3 [Dendroctonus ponderosae]	119	1.4e-50	526	91.6	95
TRINITY_DN26906_c0_g1	XP_019773539.1	PREDICTED: serine protease Hayan-like isoform X1 [Dendroctonus ponderosae]	306	2.1e-122	1147	87.6	92.2
TRINITY_DN22135_c0_g2	ENN71574.1	hypothetical protein YQE_11674, partial [Dendroctonus ponderosae]	380	3.1e-168	1543	85.8	92.9
TRINITY_DN23393_c1_g1	ERL87833.1	hypothetical protein D910_05222 [Dendroctonus ponderosae]	346	3.3e-101	964	58.7	71.7
TRINITY_DN25803_c0_g1	ERL88156.1	hypothetical protein D910_05544 [Dendroctonus ponderosae]	606	0	2891	94.6	97.2
TRINITY_DN27530_c2_g3	XP_018328756.1	uncharacterized protein LOC108739373 [Agrilus planipennis]	121	2e-23	293	46.3	66.1
TRINITY_DN27137_c1_g1	XP_019759698.1	PREDICTED: histone acetyltransferase KAT2B [Dendroctonus ponderosae]	776	0	3890	95.5	97
TRINITY_DN11640_c0_g1	CCQ18579.1	40S ribosomal protein S20 [Sycon ciliatum]	64	2.9e-19	252	76.6	92.2
TRINITY_DN24462_c0_g2	ENN74747.1	hypothetical protein YQE_08685, partial [Dendroctonus ponderosae]	93	5.6e-31	354	74.2	82.8
TRINITY_DN27358_c1_g3	ENN75474.1	hypothetical protein YQE_08023, partial [Dendroctonus ponderosae]	298	4e-158	1455	91.9	95.6
TRINITY_DN19393_c0_g1	ERL87575.1	hypothetical protein D910_04966 [Dendroctonus ponderosae]	563	1.6e-270	2425	84	89.7
TRINITY_DN20567_c0_g6	ERL94540.1	hypothetical protein D910_11817 [Dendroctonus ponderosae]	147	2.3e-47	497	78.9	81.6
TRINITY_DN23302_c0_g2	ABI52743.1	10 kDa putative secreted protein [Argas monolakensis]	101	2e-18	245	56.4	67.3
TRINITY_DN25660_c0_g2	AEE62537.1	unknown [Dendroctonus ponderosae]	193	1.8e-101	963	94.8	96.9
TRINITY_DN21418_c0_g1	XP_018896942.1	PREDICTED: uncharacterized protein LOC109030445 [Bemisia tabaci]	130	1.5e-11	189	37.7	51.5
TRINITY_DN21844_c2_g1	PCG69477.1	hypothetical protein B5V51_4051 [Heliothis virescens]	235	8.8e-40	432	39.6	60
TRINITY_DN17839_c0_g1	ERL88063.1	hypothetical protein D910_05452 [Dendroctonus ponderosae]	296	4.9e-148	1367	98	98.6
TRINITY_DN4109_c0_g1	XP_028966406.1	uncharacterized protein LOC100909061 [Galendromus occidentalis]	66	5.4e-13	196	53	68.2
TRINITY_DN23619_c0_g1	XP_019760735.1	PREDICTED: deformed epidermal autoregulatory factor 1 isoform X3 [Dendroctonus ponderosae]	361	8.3e-177	1618	95.3	95.8
TRINITY_DN17797_c0_g1	XP_019755194.1	PREDICTED: prostatic acid phosphatase-like [Dendroctonus ponderosae] >ENN80100.1 hypothetical protein YQE_03459, partial [Dendroctonus ponderosae]	374	2.4e-198	1801	91.4	94.9
TRINITY_DN21216_c0_g1	XP_019771848.1	PREDICTED: retinol dehydrogenase 14 [Dendroctonus ponderosae] >XP_019771849.1 PREDICTED: retinol dehydrogenase 14 [Dendroctonus ponderosae] >XP_019771850.1 PREDICTED: retinol dehydrogenase 14 [Dendroctonus ponderosae] >AEE63574.1 unknown [Dendroctonus ponderosae] >ENN70380.1 hypothetical protein YQE_12887, partial [Dendroctonus ponderosae] >ERL84491.1 hypothetical protein D910_01921 [Dendroctonus…	245	8.1e-134	1246	96.3	98.4
TRINITY_DN20921_c0_g5	XP_023027170.1	larval cuticle protein 8-like [Leptinotarsa decemlineata]	107	3.4e-08	158	37.4	57
TRINITY_DN25492_c0_g2	XP_019760378.1	PREDICTED: uncharacterized protein LOC109537892 [Dendroctonus ponderosae] >XP_019760379.1 PREDICTED: uncharacterized protein LOC109537892 [Dendroctonus ponderosae]	664	0	3201	93.7	96.4
TRINITY_DN18724_c0_g1	VDK57217.1	unnamed protein product [Anisakis simplex]	60	8.5e-06	136	50	61.7
TRINITY_DN22359_c2_g2	XP_022903227.1	longitudinals lacking protein, isoforms A/B/D/L isoform X21 [Onthophagus taurus]	54	8.1e-10	170	48.1	75.9
TRINITY_DN24508_c0_g1	ERL89428.1	hypothetical protein D910_06795 [Dendroctonus ponderosae]	468	1e-271	2437	95.9	98.1
TRINITY_DN24243_c2_g6	EFA02765.1	Transposable element Tc3 transposase-like Protein [Tribolium castaneum]	103	2e-11	190	37.9	56.3
TRINITY_DN19930_c0_g2	ENN71106.1	hypothetical protein YQE_12039, partial [Dendroctonus ponderosae]	424	9.5e-182	1660	94.1	95.3
TRINITY_DN11458_c0_g2	ENN71241.1	hypothetical protein YQE_12168, partial [Dendroctonus ponderosae]	161	8e-79	767	95.7	98.1
TRINITY_DN8985_c0_g1	KRX12102.1	Light-regulated protein, partial [Trichinella nelsoni]	113	5.8e-23	285	51.3	68.1
TRINITY_DN24800_c0_g1	XP_019754823.1	PREDICTED: MAP7 domain-containing protein 1-like isoform X7 [Dendroctonus ponderosae]	260	1.2e-105	1009	94.2	95.8
TRINITY_DN26467_c0_g2	XP_016659447.1	PREDICTED: uncharacterized protein LOC107883620 [Acyrthosiphon pisum]	107	1.4e-20	266	43.9	66.4
TRINITY_DN23289_c4_g3	XP_019755587.1	PREDICTED: uncharacterized protein LOC109534342, partial [Dendroctonus ponderosae]	133	1.3e-20	267	39.8	65.4
TRINITY_DN18857_c0_g1	XP_019768722.1	PREDICTED: uncharacterized protein LOC109543442 isoform X1 [Dendroctonus ponderosae] >XP_019756813.1 PREDICTED: uncharacterized protein LOC109535366 isoform X1 [Dendroctonus ponderosae] >ENN82510.1 hypothetical protein YQE_01117, partial [Dendroctonus ponderosae]	297	3e-157	1446	91.6	95.3
TRINITY_DN4982_c0_g1	XP_019763286.1	PREDICTED: Kv channel-interacting protein 1 isoform X1 [Dendroctonus ponderosae]	95	3.5e-34	381	93.7	93.7
TRINITY_DN16114_c0_g1	XP_019772478.1	PREDICTED: tetra-peptide repeat homeobox protein 1-like [Dendroctonus ponderosae] >XP_019753773.1 PREDICTED: tetra-peptide repeat homeobox protein 1-like [Dendroctonus ponderosae]	164	2e-28	335	59.8	60.4
TRINITY_DN22324_c0_g2	XP_019759598.1	PREDICTED: isovaleryl-CoA dehydrogenase, mitochondrial isoform X3 [Dendroctonus ponderosae]	290	2.3e-162	1493	95.5	97.9
TRINITY_DN21787_c0_g1	ENN81087.1	hypothetical protein YQE_02455, partial [Dendroctonus ponderosae]	71	5.7e-09	172	47.9	70.4
TRINITY_DN23218_c2_g5	ENN78097.1	hypothetical protein YQE_05251, partial [Dendroctonus ponderosae]	60	1.5e-28	332	100	100
TRINITY_DN21857_c0_g5	ERL96104.1	hypothetical protein D910_01043, partial [Dendroctonus ponderosae]	181	1.2e-22	283	34.3	55.8
TRINITY_DN26816_c0_g2	ENN71028.1	hypothetical protein YQE_12427, partial [Dendroctonus ponderosae]	471	3.1e-221	2000	84.1	89.8
TRINITY_DN24217_c0_g1	XP_017787275.1	PREDICTED: glutamate receptor 1-like isoform X1 [Nicrophorus vespilloides]	675	0	2938	81.5	91.4
TRINITY_DN23122_c0_g1	PSN54740.1	hypothetical protein C0J52_04873 [Blattella germanica]	105	1.5e-21	274	49.5	67.6
TRINITY_DN24215_c2_g2	XP_023310053.1	uncharacterized protein LOC108904648 [Anoplophora glabripennis]	203	6.9e-35	389	47.3	57.1
TRINITY_DN30478_c0_g1	XP_021339614.1	60S ribosomal protein L4-A-like [Mizuhopecten yessoensis] >OWF36947.1 60S ribosomal protein L4-A [Mizuhopecten yessoensis]	118	8.5e-30	343	60.2	72.9
TRINITY_DN25483_c0_g1	ERL94415.1	hypothetical protein D910_11693 [Dendroctonus ponderosae]	327	1.2e-167	1540	93.3	96.6
TRINITY_DN20000_c0_g1	ENN77115.1	hypothetical protein YQE_06369, partial [Dendroctonus ponderosae]	63	2.1e-09	172	52.4	57.1
TRINITY_DN16312_c0_g1	NP_001233143.1	interferon-induced transmembrane protein 2 [Sus scrofa] >AEE02030.1 interferon-induced transmembrane protein 2 [Sus scrofa] >AFG25599.1 IFITM2 [Sus scrofa]	117	1.8e-56	573	99.1	99.1
TRINITY_DN23289_c3_g1	KYQ58523.1	THAP domain-containing protein 9 [Trachymyrmex zeteki]	88	1.1e-13	204	50	65.9
TRINITY_DN25753_c3_g6	XP_019769264.1	PREDICTED: sodium/potassium-transporting ATPase subunit alpha isoform X8 [Dendroctonus ponderosae]	38	9.2e-13	199	100	100
TRINITY_DN16176_c0_g1	XP_019753604.1	PREDICTED: F-box protein At5g06550 [Dendroctonus ponderosae]	261	1.8e-150	1387	94.6	97.3
TRINITY_DN19323_c0_g1	XP_018571059.1	uncharacterized protein LOC108910813 [Anoplophora glabripennis]	300	1.2e-28	338	33	53.7
TRINITY_DN25901_c0_g1	XP_019761009.1	PREDICTED: TGF-beta-activated kinase 1 and MAP3K7-binding protein 2 isoform X3 [Dendroctonus ponderosae]	567	4.5e-307	2741	97	98.2
TRINITY_DN12188_c0_g1	XP_017799269.1	PREDICTED: retinal homeobox protein Rx1-like [Habropoda laboriosa] >KOC68399.1 Retinal homeobox protein Rx [Habropoda laboriosa]	38	4.4e-07	149	73.7	84.2
TRINITY_DN24610_c4_g3	ERL93526.1	hypothetical protein D910_10815 [Dendroctonus ponderosae]	59	1.2e-11	190	64.4	76.3
TRINITY_DN18227_c0_g2	XP_010729098.1	hemoglobin subunit beta-2 [Larimichthys crocea] >TMS22637.1 hypothetical protein E3U43_012902 [Larimichthys crocea]	132	3.3e-73	718	100	100
TRINITY_DN26403_c0_g1	XP_019771183.1	PREDICTED: calcium-independent protein kinase C isoform X1 [Dendroctonus ponderosae]	721	0	3775	97.4	98.5
TRINITY_DN27684_c2_g1	KOB65133.1	putative pol-like protein, partial [Operophtera brumata]	299	4.5e-30	349	31.1	51.2
TRINITY_DN25461_c1_g2	XP_019760675.1	PREDICTED: oocyte zinc finger protein XlCOF19-like [Dendroctonus ponderosae]	66	1.2e-17	241	66.7	78.8
TRINITY_DN17796_c0_g1	ENN74689.1	hypothetical protein YQE_08806, partial [Dendroctonus ponderosae]	209	1e-100	957	90.9	96.2
TRINITY_DN25442_c1_g6	XP_019772380.1	PREDICTED: apoptosis-stimulating of p53 protein 2-like [Dendroctonus ponderosae]	32	1.8e-08	160	90.6	93.8
TRINITY_DN35439_c0_g1	XP_026676240.1	tubulin--tyrosine ligase-like protein 12 isoform X1 [Diaphorina citri] >XP_026676241.1 tubulin--tyrosine ligase-like protein 12 isoform X2 [Diaphorina citri]	79	4.9e-13	197	49.4	65.8
TRINITY_DN24828_c0_g2	XP_022909876.1	uncharacterized protein LOC111421004 [Onthophagus taurus]	93	1.3e-11	190	51.6	62.4
TRINITY_DN22838_c0_g1	XP_019755693.1	PREDICTED: TPPP family protein CG45057-like [Dendroctonus ponderosae] >XP_019755694.1 PREDICTED: TPPP family protein CG45057-like [Dendroctonus ponderosae] >ENN79779.1 hypothetical protein YQE_03835, partial [Dendroctonus ponderosae] >ERL91604.1 hypothetical protein D910_08934 [Dendroctonus ponderosae]	191	9.6e-100	952	97.4	99.5
TRINITY_DN18465_c0_g2	XP_027957295.1	40S ribosomal protein SA-like [Eumetopias jubatus]	78	1.1e-28	332	100	100
TRINITY_DN24143_c0_g1	XP_019758701.1	PREDICTED: V-type proton ATPase subunit H isoform X1 [Dendroctonus ponderosae] >XP_019758702.1 PREDICTED: V-type proton ATPase subunit H isoform X1 [Dendroctonus ponderosae]	531	3.4e-298	2666	99.2	99.6
TRINITY_DN26967_c0_g2	ENN78459.1	hypothetical protein YQE_05097, partial [Dendroctonus ponderosae] >ERL87970.1 hypothetical protein D910_05358 [Dendroctonus ponderosae]	26	3.5e-06	141	92.3	96.2
TRINITY_DN22391_c0_g2	ENN71367.1	hypothetical protein YQE_11982, partial [Dendroctonus ponderosae]	312	2.4e-114	1083	67.9	77.6
TRINITY_DN24253_c0_g1	XP_019757125.1	PREDICTED: SH3 and multiple ankyrin repeat domains protein 3-like [Dendroctonus ponderosae]	1172	0	4029	87.3	88.6
TRINITY_DN23754_c0_g3	XP_019758425.1	PREDICTED: guanine nucleotide-binding protein subunit gamma-1-like isoform X4 [Dendroctonus ponderosae]	70	1.6e-31	359	98.6	100
TRINITY_DN17154_c0_g1	XP_019768689.1	PREDICTED: uncharacterized protein LOC109543420 [Dendroctonus ponderosae]	254	8.8e-145	1338	96.9	97.6
TRINITY_DN25336_c0_g2	XP_019767340.1	PREDICTED: uncharacterized protein LOC109542527 isoform X1 [Dendroctonus ponderosae]	685	2.6e-292	2615	94.7	96.2
TRINITY_DN18381_c0_g1	XP_019768808.1	PREDICTED: O-acyltransferase like protein-like [Dendroctonus ponderosae]	613	0	2939	92.7	95.1
TRINITY_DN25726_c1_g1	XP_019762795.1	PREDICTED: nucleobindin-2 [Dendroctonus ponderosae] >XP_019762797.1 PREDICTED: nucleobindin-2 [Dendroctonus ponderosae]	406	2e-200	1823	92.9	94.6
TRINITY_DN27578_c0_g2	XP_028146276.1	uncharacterized protein LOC114339788 [Diabrotica virgifera virgifera]	114	1.8e-19	255	47.4	66.7
TRINITY_DN23865_c3_g1	XP_019768873.1	PREDICTED: E3 ubiquitin-protein ligase RNF139-like isoform X1 [Dendroctonus ponderosae]	322	4.9e-171	1568	91.9	95.7
TRINITY_DN21849_c0_g2	EFA01424.1	odorant receptor 294 [Tribolium castaneum]	203	9.4e-09	165	25.6	51.2
TRINITY_DN23711_c0_g1	XP_018908160.1	PREDICTED: craniofacial development protein 2-like [Bemisia tabaci]	265	4.7e-71	702	48.7	69.8
TRINITY_DN25100_c1_g1	XP_026316211.1	histone-lysine N-methyltransferase SETMAR-like [Hyposmocoma kahamanoa]	270	9.7e-13	200	28.1	43
TRINITY_DN26835_c0_g2	XP_019773556.1	PREDICTED: protein tramtrack, beta isoform isoform X1 [Dendroctonus ponderosae] >XP_019773557.1 PREDICTED: protein tramtrack, beta isoform isoform X1 [Dendroctonus ponderosae] >ENN81478.1 hypothetical protein YQE_02170, partial [Dendroctonus ponderosae] >ERL92101.1 hypothetical protein D910_09422 [Dendroctonus ponderosae]	373	2.8e-200	1822	95.4	97.6
TRINITY_DN22783_c0_g3	XP_005097692.1	PREDICTED: casein kinase I isoform alpha [Aplysia californica]	303	4.5e-112	1058	66	79.2
TRINITY_DN27251_c0_g2	XP_019762757.1	PREDICTED: armadillo repeat-containing protein 8-like [Dendroctonus ponderosae]	654	0	2803	86.4	92.8
TRINITY_DN31011_c0_g1	GBP02489.1	Anaerobic C4-dicarboxylate transporter DcuA [Eumeta japonica]	79	3.8e-08	155	43	62
TRINITY_DN24876_c0_g1	ERL89755.1	hypothetical protein D910_07116 [Dendroctonus ponderosae]	357	3.9e-141	1311	74.5	78.4
TRINITY_DN18262_c0_g1	VBB28906.1	unnamed protein product [Acanthocheilonema viteae]	80	7.5e-07	148	33.8	58.8
TRINITY_DN23347_c0_g10	ERL93526.1	hypothetical protein D910_10815 [Dendroctonus ponderosae]	164	7.9e-30	349	45.1	62.8
TRINITY_DN18295_c0_g1	XP_019763313.1	PREDICTED: T-box-containing protein TBX6L-like [Dendroctonus ponderosae] >XP_019763314.1 PREDICTED: T-box-containing protein TBX6L-like [Dendroctonus ponderosae]	410	3.8e-179	1639	78.3	83.2
TRINITY_DN25409_c0_g1	XP_019762884.1	PREDICTED: uncharacterized protein LOC109539534 isoform X1 [Dendroctonus ponderosae]	1700	0	6936	87.9	89.6
TRINITY_DN22927_c1_g1	AAT74924.1	transcription factor YY1, partial [Ovis aries]	79	2e-25	313	67.1	78.5
TRINITY_DN26813_c2_g2	XP_019755102.1	PREDICTED: negative elongation factor E [Dendroctonus ponderosae] >XP_019755104.1 PREDICTED: negative elongation factor E [Dendroctonus ponderosae] >XP_019755105.1 PREDICTED: negative elongation factor E [Dendroctonus ponderosae] >XP_019755106.1 PREDICTED: negative elongation factor E [Dendroctonus ponderosae] >XP_019755107.1 PREDICTED: negative elongation factor E [Dendroctonus ponderosae] >ENN8…	271	1.2e-120	1131	98.9	100
TRINITY_DN23723_c0_g2	ERL95570.1	hypothetical protein D910_12831 [Dendroctonus ponderosae]	413	4e-221	1999	88.9	94.7
TRINITY_DN25286_c1_g2	XP_019756381.1	PREDICTED: transferrin-like isoform X2 [Dendroctonus ponderosae]	581	0	2803	90.7	95.2
TRINITY_DN30771_c0_g1	XP_013852489.2	S100 calcium binding protein A9 isoform X1 [Sus scrofa]	110	1.6e-53	548	99.1	99.1
TRINITY_DN23666_c0_g3	XP_019768188.1	PREDICTED: E3 ubiquitin-protein ligase TRIM33 [Dendroctonus ponderosae] >ENN72418.1 hypothetical protein YQE_10936, partial [Dendroctonus ponderosae]	1049	0	4840	95.9	97.4
TRINITY_DN21255_c0_g2	ENN75492.1	hypothetical protein YQE_08041, partial [Dendroctonus ponderosae]	228	7.5e-115	1079	91.2	95.2
TRINITY_DN24563_c0_g2	XP_019771076.1	PREDICTED: LOW QUALITY PROTEIN: septin-interacting protein 1 [Dendroctonus ponderosae]	162	7.2e-81	786	94.4	96.3
TRINITY_DN26956_c0_g2	XP_019754081.1	PREDICTED: uncharacterized protein LOC109533248, partial [Dendroctonus ponderosae]	463	1.1e-85	831	41	56.6
TRINITY_DN34706_c0_g1	XP_019764902.1	PREDICTED: forkhead box protein I2-B [Dendroctonus ponderosae] >ENN74126.1 hypothetical protein YQE_09099, partial [Dendroctonus ponderosae] >ERL94257.1 hypothetical protein D910_11538 [Dendroctonus ponderosae]	291	6e-166	1523	99.7	99.7
TRINITY_DN23452_c1_g2	AEE61499.1	unknown [Dendroctonus ponderosae] >ENN78981.1 hypothetical protein YQE_04565, partial [Dendroctonus ponderosae] >ERL93862.1 hypothetical protein D910_11148 [Dendroctonus ponderosae]	292	3.6e-168	1544	97.3	98.3
TRINITY_DN23525_c0_g1	ENN75413.1	hypothetical protein YQE_07964, partial [Dendroctonus ponderosae]	348	7.9e-37	410	75	77
TRINITY_DN26886_c0_g2	ERL83993.1	hypothetical protein D910_01309 [Dendroctonus ponderosae]	132	8e-75	732	96.2	97
TRINITY_DN20462_c2_g5	ENN80821.1	hypothetical protein YQE_02764, partial [Dendroctonus ponderosae]	76	1.4e-25	306	76.3	88.2
TRINITY_DN24598_c0_g1	ERL83597.1	hypothetical protein D910_00703 [Dendroctonus ponderosae] >ERL85913.1 hypothetical protein D910_03328 [Dendroctonus ponderosae]	523	1.3e-278	2497	92.4	95.2
TRINITY_DN25404_c2_g1	XP_019769532.1	PREDICTED: calsyntenin-1 isoform X2 [Dendroctonus ponderosae]	932	0	4638	98.2	98.7
TRINITY_DN19856_c0_g1	XP_019755705.1	PREDICTED: xenotropic and polytropic retrovirus receptor 1-like [Dendroctonus ponderosae]	822	0	3258	79.8	80.2
TRINITY_DN24327_c0_g1	XP_019772355.1	PREDICTED: uncharacterized protein LOC109545952 [Dendroctonus ponderosae]	196	7.4e-91	877	96.4	98
TRINITY_DN26923_c0_g1	XP_008181107.1	PREDICTED: piggyBac transposable element-derived protein 4-like [Acyrthosiphon pisum]	237	9.2e-56	571	46.4	64.1
TRINITY_DN16004_c0_g1	XP_019758534.1	PREDICTED: cold and drought-regulated protein CORA-like [Dendroctonus ponderosae]	48	6.1e-14	209	91.7	93.8
TRINITY_DN20892_c1_g6	XP_018565377.1	putative nuclease HARBI1 [Anoplophora glabripennis] >XP_023310356.1 putative nuclease HARBI1 [Anoplophora glabripennis] >XP_023310857.1 putative nuclease HARBI1 [Anoplophora glabripennis] >XP_023311032.1 putative nuclease HARBI1 [Anoplophora glabripennis] >XP_023312668.1 putative nuclease HARBI1 [Anoplophora glabripennis]	47	1.6e-07	150	59.6	76.6
TRINITY_DN19170_c0_g2	XP_019753283.1	PREDICTED: uncharacterized protein LOC109532718 [Dendroctonus ponderosae]	517	2.1e-273	2451	97.1	98.5
TRINITY_DN26556_c0_g2	ENN73680.1	hypothetical protein YQE_09710, partial [Dendroctonus ponderosae]	416	2e-220	1995	92.8	96.4
TRINITY_DN20689_c1_g1	XP_019762127.1	PREDICTED: xyloside xylosyltransferase 1-like [Dendroctonus ponderosae]	299	6.7e-161	1480	92.6	95.7
TRINITY_DN25695_c0_g1	XP_019762940.1	PREDICTED: beta-1,3-glucosyltransferase, partial [Dendroctonus ponderosae]	337	5.6e-168	1541	86.9	91.7
TRINITY_DN32487_c0_g1	EDL18247.1	cortactin, isoform CRA_b [Mus musculus]	38	7.2e-13	195	100	100
TRINITY_DN21570_c5_g3	AEE62893.1	unknown [Dendroctonus ponderosae]	332	1.4e-182	1667	97	98.5
TRINITY_DN23187_c0_g1	XP_019764661.1	PREDICTED: NACHT domain- and WD repeat-containing protein 1 [Dendroctonus ponderosae] >XP_019764662.1 PREDICTED: NACHT domain- and WD repeat-containing protein 1 [Dendroctonus ponderosae] >XP_019764663.1 PREDICTED: NACHT domain- and WD repeat-containing protein 1 [Dendroctonus ponderosae] >XP_019764664.1 PREDICTED: NACHT domain- and WD repeat-containing protein 1 [Dendroctonus ponderosae] >XP_019…	1347	0	6799	95.2	97.9
TRINITY_DN25480_c0_g1	XP_019758012.1	PREDICTED: asparagine synthetase domain-containing protein CG17486 [Dendroctonus ponderosae]	237	2.3e-133	1242	97	98.7
TRINITY_DN23438_c0_g4	XP_019771058.1	PREDICTED: dual specificity protein phosphatase 23-like [Dendroctonus ponderosae] >XP_019771059.1 PREDICTED: dual specificity protein phosphatase 23-like [Dendroctonus ponderosae] >ENN70847.1 hypothetical protein YQE_12510, partial [Dendroctonus ponderosae] >ERL83589.1 hypothetical protein D910_00690 [Dendroctonus ponderosae] >ERL83962.1 hypothetical protein D910_01261 [Dendroctonus ponderosae]	145	7.9e-73	715	92.4	96.6
TRINITY_DN25384_c0_g1	XP_019761254.1	PREDICTED: endonuclease III-like protein 1 isoform X1 [Dendroctonus ponderosae] >XP_019761255.1 PREDICTED: endonuclease III-like protein 1 isoform X1 [Dendroctonus ponderosae] >XP_019761256.1 PREDICTED: endonuclease III-like protein 1 isoform X1 [Dendroctonus ponderosae] >ENN76397.1 hypothetical protein YQE_07058, partial [Dendroctonus ponderosae]	319	5.3e-155	1427	85.6	92.2
TRINITY_DN9568_c1_g1	NP_034141.3	cytochrome P450 4A10 [Mus musculus] >O88833.2 RecName: Full=Cytochrome P450 4A10; AltName: Full=CYPIVA10; AltName: Full=Cytochrome P450-LA-omega 1; AltName: Full=Cytochrome P452; AltName: Full=Lauric acid omega-hydroxylase; AltName: Full=Long-chain fatty acid omega-monooxygenase >BAB22165.1 unnamed protein product [Mus musculus]	119	1.7e-65	651	100	100
TRINITY_DN20972_c0_g6	XP_019761901.1	PREDICTED: GTP-binding protein REM 1 [Dendroctonus ponderosae]	411	2.1e-226	2044	99.3	99.3
TRINITY_DN15627_c0_g1	EHH30656.1	hypothetical protein EGK_20409, partial [Macaca mulatta]	133	1.5e-62	627	97.7	98.5
TRINITY_DN10533_c0_g1	XP_023016820.1	transcription factor collier [Leptinotarsa decemlineata] >AKQ48972.1 putative transcription factor collier [Leptinotarsa decemlineata]	64	7.4e-20	257	82.8	90.6
TRINITY_DN26033_c0_g3	ENN79544.1	hypothetical protein YQE_04007, partial [Dendroctonus ponderosae] >ERL87300.1 hypothetical protein D910_04695, partial [Dendroctonus ponderosae]	214	1.3e-119	1122	96.7	99.1
TRINITY_DN21100_c1_g1	AEE63286.1	unknown [Dendroctonus ponderosae] >ENN71159.1 hypothetical protein YQE_12089, partial [Dendroctonus ponderosae] >ERL88120.1 hypothetical protein D910_05508 [Dendroctonus ponderosae]	353	1.5e-197	1796	96.6	98.9
TRINITY_DN23087_c0_g1	ERL84008.1	hypothetical protein D910_01325 [Dendroctonus ponderosae] >ERL88956.1 hypothetical protein D910_06334 [Dendroctonus ponderosae]	75	3.8e-31	360	93.3	96
TRINITY_DN23977_c0_g1	ENN71239.1	hypothetical protein YQE_12166, partial [Dendroctonus ponderosae]	503	2e-142	1320	55.9	56.1
TRINITY_DN22717_c0_g1	ERL85092.1	hypothetical protein D910_02514 [Dendroctonus ponderosae] >ERL96040.1 hypothetical protein D910_00865 [Dendroctonus ponderosae]	505	5.5e-241	2171	80.8	86.9
TRINITY_DN23758_c0_g1	XP_019768456.1	PREDICTED: pyruvate dehydrogenase [acetyl-transferring]-phosphatase 1, mitochondrial [Dendroctonus ponderosae] >AEE62266.1 unknown [Dendroctonus ponderosae] >ENN72249.1 hypothetical protein YQE_11112, partial [Dendroctonus ponderosae] >ERL94350.1 hypothetical protein D910_11631 [Dendroctonus ponderosae]	734	2.6e-183	1675	54	58.2
TRINITY_DN23917_c0_g1	XP_019773661.1	PREDICTED: uncharacterized protein LOC109546927 isoform X1 [Dendroctonus ponderosae]	194	6.6e-97	925	87.6	92.8
TRINITY_DN24805_c0_g2	XP_019765841.1	PREDICTED: vacuolar protein sorting-associated protein 16 homolog [Dendroctonus ponderosae]	854	0	3921	90.5	92.4
TRINITY_DN21499_c0_g1	ENN76909.1	hypothetical protein YQE_06556, partial [Dendroctonus ponderosae]	679	0	3188	92	95.6
TRINITY_DN26005_c0_g2	XP_019770009.1	PREDICTED: follistatin isoform X2 [Dendroctonus ponderosae]	325	1.1e-192	1755	96.3	97.2
TRINITY_DN26858_c0_g1	XP_019757786.1	PREDICTED: protein NDRG3-like isoform X3 [Dendroctonus ponderosae]	351	3.7e-201	1831	97.7	98.9
TRINITY_DN22897_c2_g2	ERL89459.1	hypothetical protein D910_06826 [Dendroctonus ponderosae]	59	1.3e-28	341	98.3	100
TRINITY_DN25080_c1_g1	XP_019766198.1	PREDICTED: peptide transporter family 1-like isoform X1 [Dendroctonus ponderosae]	672	0	3129	93.9	96.4
TRINITY_DN26888_c0_g1	XP_019768320.1	PREDICTED: uncharacterized protein LOC109543182 [Dendroctonus ponderosae] >ENN72369.1 hypothetical protein YQE_11004, partial [Dendroctonus ponderosae]	799	0	4310	97.6	99
TRINITY_DN27349_c1_g3	ERL89076.1	hypothetical protein D910_06453 [Dendroctonus ponderosae]	184	7.5e-65	649	68.5	79.3
TRINITY_DN20801_c0_g1	XP_019759341.1	PREDICTED: AP-3 complex subunit beta-2 [Dendroctonus ponderosae]	1052	0	4388	93.1	93.7
TRINITY_DN29523_c0_g1	XP_003277734.1	PREDICTED: interleukin-1 beta isoform X3 [Nomascus leucogenys]	102	5.6e-52	534	100	100
TRINITY_DN21266_c0_g4	XP_019754168.1	PREDICTED: dnaJ homolog subfamily C member 28 [Dendroctonus ponderosae] >ENN80739.1 hypothetical protein YQE_02847, partial [Dendroctonus ponderosae] >ERL90637.1 hypothetical protein D910_07984 [Dendroctonus ponderosae]	95	1.6e-40	436	88.4	95.8
TRINITY_DN21438_c0_g3	XP_019768268.1	PREDICTED: intraflagellar transport protein 46 homolog [Dendroctonus ponderosae] >XP_019768269.1 PREDICTED: intraflagellar transport protein 46 homolog [Dendroctonus ponderosae]	363	9.7e-186	1693	93.9	96.1
TRINITY_DN23765_c0_g1	XP_019760320.1	PREDICTED: calcium-activated chloride channel regulator 4-like [Dendroctonus ponderosae]	1216	0	5742	94.6	96.3
TRINITY_DN23746_c1_g1	XP_019764921.1	PREDICTED: segmentation protein cap'n'collar isoform X1 [Dendroctonus ponderosae]	950	0	3310	74.5	75.3
TRINITY_DN21188_c2_g3	XP_019881135.1	PREDICTED: longitudinals lacking protein isoform X20 [Aethina tumida]	74	7.2e-22	282	67.6	77
TRINITY_DN23908_c0_g7	XP_019766151.1	PREDICTED: uncharacterized protein LOC109541681 [Dendroctonus ponderosae] >XP_019766153.1 PREDICTED: uncharacterized protein LOC109541682 [Dendroctonus ponderosae] >ERL87416.1 hypothetical protein D910_04811 [Dendroctonus ponderosae]	115	1e-24	305	53.9	69.6
TRINITY_DN19726_c0_g1	XP_019760120.1	PREDICTED: piezo-type mechanosensitive ion channel component 2-like [Dendroctonus ponderosae]	299	5.5e-97	926	56.5	76.9
TRINITY_DN12528_c0_g1	XP_019768520.1	PREDICTED: E3 ubiquitin-protein ligase MYCBP2 [Dendroctonus ponderosae]	245	2.6e-137	1273	96.3	98
TRINITY_DN23459_c0_g2	ENN72053.1	hypothetical protein YQE_11341, partial [Dendroctonus ponderosae]	437	1e-231	2091	97.9	98.9
TRINITY_DN21032_c0_g2	XP_019766027.1	PREDICTED: dihydroorotate dehydrogenase (quinone), mitochondrial [Dendroctonus ponderosae]	346	1.6e-159	1467	84.4	86.4
TRINITY_DN25542_c0_g1	XP_019761994.1	PREDICTED: uncharacterized protein LOC109538964 [Dendroctonus ponderosae]	541	0	2840	94.8	96.9
TRINITY_DN19144_c0_g1	ERL92652.1	hypothetical protein D910_09965 [Dendroctonus ponderosae]	149	1.4e-68	682	85.9	89.9
TRINITY_DN31330_c0_g1	XP_018569139.1	uncharacterized protein LOC108909312 [Anoplophora glabripennis]	63	1.8e-10	175	49.2	71.4
TRINITY_DN10479_c0_g1	ADI61817.1	endonuclease-reverse transcriptase [Bombyx mori]	70	1.6e-13	201	51.4	72.9
TRINITY_DN13694_c0_g1	ERL93357.1	hypothetical protein D910_10649, partial [Dendroctonus ponderosae]	39	1.1e-10	176	82.1	89.7
TRINITY_DN31753_c0_g1	XP_018575082.1	translation elongation factor 2 [Anoplophora glabripennis]	66	8e-33	367	100	100
TRINITY_DN21931_c1_g2	XP_019764326.1	PREDICTED: enhancer of mRNA-decapping protein 4 [Dendroctonus ponderosae]	1111	0	5003	87.6	93.9
TRINITY_DN24308_c2_g1	XP_019765058.1	PREDICTED: uncharacterized protein LOC109540942 isoform X2 [Dendroctonus ponderosae]	347	2.4e-105	1000	69.5	70.9
TRINITY_DN26780_c0_g1	XP_019769740.1	PREDICTED: 5-oxoprolinase [Dendroctonus ponderosae]	698	0	3454	94.4	97
TRINITY_DN24873_c1_g8	PZC74016.1	hypothetical protein B5X24_HaOG208430 [Helicoverpa armigera]	102	1.6e-24	298	55.9	72.5
TRINITY_DN23554_c0_g2	XP_019758426.1	PREDICTED: 39S ribosomal protein L51, mitochondrial [Dendroctonus ponderosae] >ENN78006.1 hypothetical protein YQE_05526, partial [Dendroctonus ponderosae] >ERL85928.1 hypothetical protein D910_03343 [Dendroctonus ponderosae]	92	2.2e-43	465	91.3	98.9
TRINITY_DN27056_c1_g1	XP_019764155.1	PREDICTED: signal recognition particle subunit SRP68 [Dendroctonus ponderosae] >ENN74858.1 hypothetical protein YQE_08628, partial [Dendroctonus ponderosae]	566	3.9e-287	2571	90.8	93.3
TRINITY_DN26801_c0_g5	ENN76621.1	hypothetical protein YQE_06878, partial [Dendroctonus ponderosae]	70	8.5e-17	229	74.3	80
TRINITY_DN24935_c0_g1	AEE63435.1	unknown [Dendroctonus ponderosae] >ERL95193.1 hypothetical protein D910_12461 [Dendroctonus ponderosae]	123	4.9e-63	634	97.6	100
TRINITY_DN20117_c0_g1	XP_019765766.1	PREDICTED: general transcription factor IIE subunit 2-like [Dendroctonus ponderosae] >XP_019772776.1 PREDICTED: general transcription factor IIE subunit 2-like [Dendroctonus ponderosae] >AEE62566.1 unknown [Dendroctonus ponderosae] >ENN81901.1 hypothetical protein YQE_01716, partial [Dendroctonus ponderosae] >ENN82710.1 hypothetical protein YQE_00922, partial [Dendroctonus ponderosae] >ERL85053.1…	292	3.2e-141	1308	93.5	96.2
TRINITY_DN20467_c0_g2	XP_001618200.1	hypothetical protein NEMVEDRAFT_v1g155353 [Nematostella vectensis] >XP_001619109.1 hypothetical protein NEMVEDRAFT_v1g152336 [Nematostella vectensis] >EDO26100.1 predicted protein, partial [Nematostella vectensis] >EDO27009.1 predicted protein, partial [Nematostella vectensis]	34	3.3e-07	148	85.3	85.3
TRINITY_DN26396_c0_g2	ENN80364.1	hypothetical protein YQE_03223, partial [Dendroctonus ponderosae] >ENN83366.1 hypothetical protein YQE_00274, partial [Dendroctonus ponderosae]	291	1e-157	1453	94.8	97.6
TRINITY_DN18843_c0_g3	XP_019772579.1	PREDICTED: acetylcholine receptor subunit alpha-like 1 [Dendroctonus ponderosae] >ENN82001.1 hypothetical protein YQE_01576, partial [Dendroctonus ponderosae]	119	1.9e-61	616	94.1	96.6
TRINITY_DN13897_c0_g1	KMQ86427.1	hypothetical protein RF55_14582, partial [Lasius niger]	62	1.1e-22	280	74.2	91.9
TRINITY_DN25763_c0_g2	XP_019758804.1	PREDICTED: tubulin polyglutamylase TTLL5 isoform X4 [Dendroctonus ponderosae]	98	7.8e-41	440	87.8	93.9
TRINITY_DN23933_c0_g1	XP_019758225.1	PREDICTED: probable multidrug resistance-associated protein lethal(2)03659 [Dendroctonus ponderosae]	1365	0	6132	90.4	93.5
TRINITY_DN24462_c0_g8	XP_019768351.1	PREDICTED: uncharacterized protein LOC109543207 [Dendroctonus ponderosae]	125	3.2e-46	485	76	82.4
TRINITY_DN26462_c0_g1	XP_019755492.1	PREDICTED: ATP-dependent DNA helicase Q4 [Dendroctonus ponderosae] >ENN79822.1 hypothetical protein YQE_03645, partial [Dendroctonus ponderosae]	1024	0	4749	90.5	93.4
TRINITY_DN26863_c0_g1	XP_019754720.1	PREDICTED: suppressor of hairless protein [Dendroctonus ponderosae] >ENN80360.1 hypothetical protein YQE_03219, partial [Dendroctonus ponderosae]	504	1.7e-298	2667	98.8	99
TRINITY_DN35102_c0_g1	XP_019771072.1	PREDICTED: testis-specific serine/threonine-protein kinase 3 [Dendroctonus ponderosae] >ENN70804.1 hypothetical protein YQE_12469, partial [Dendroctonus ponderosae] >ERL86256.1 hypothetical protein D910_03666 [Dendroctonus ponderosae]	348	2.7e-198	1801	98.9	99.7
TRINITY_DN24467_c0_g3	ENN70503.1	hypothetical protein YQE_12679, partial [Dendroctonus ponderosae] >ERL87406.1 hypothetical protein D910_04801 [Dendroctonus ponderosae]	63	1.9e-26	316	100	100
TRINITY_DN25932_c0_g1	XP_019758210.1	PREDICTED: uncharacterized protein LOC109536435 [Dendroctonus ponderosae]	697	0	2864	83.5	89.7
TRINITY_DN26903_c2_g4	ENN71261.1	hypothetical protein YQE_12188, partial [Dendroctonus ponderosae]	40	1.5e-09	170	85	90
TRINITY_DN19093_c0_g1	XP_023016780.1	ankyrin repeat and KH domain-containing protein 1-like isoform X1 [Leptinotarsa decemlineata]	215	1.8e-33	378	40.5	57.7
TRINITY_DN2180_c0_g2	AAL34533.1	transferrin [Mus musculus]	159	2.6e-90	866	100	100
TRINITY_DN24718_c0_g2	XP_019757822.1	PREDICTED: histone-lysine N-methyltransferase E(z) isoform X1 [Dendroctonus ponderosae] >ENN78407.1 hypothetical protein YQE_05207, partial [Dendroctonus ponderosae]	738	0	3302	96.6	97.4
TRINITY_DN23581_c0_g2	ENN74029.1	hypothetical protein YQE_09370, partial [Dendroctonus ponderosae]	173	7.5e-93	898	100	100
TRINITY_DN11525_c0_g1	XP_018575234.1	uncharacterized protein LOC108914026 [Anoplophora glabripennis]	124	9.6e-40	429	75	83.9
TRINITY_DN19263_c0_g1	XP_019766719.1	PREDICTED: 15-hydroxyprostaglandin dehydrogenase [NAD(+)]-like isoform X2 [Dendroctonus ponderosae] >ENN73277.1 hypothetical protein YQE_10107, partial [Dendroctonus ponderosae]	316	8.7e-167	1529	95.9	97.5
TRINITY_DN24091_c2_g1	ERL94025.1	hypothetical protein D910_11309 [Dendroctonus ponderosae]	93	4.7e-44	471	98.9	100
TRINITY_DN26996_c1_g4	XP_019761896.1	PREDICTED: cytosolic Fe-S cluster assembly factor NUBP1 homolog isoform X1 [Dendroctonus ponderosae]	54	3.7e-19	250	90.7	90.7
TRINITY_DN20769_c2_g7	ENN76904.1	hypothetical protein YQE_06552, partial [Dendroctonus ponderosae]	36	3.3e-12	193	100	100
TRINITY_DN21050_c0_g5	VDO18229.1	unnamed protein product [Brugia timori]	62	1.1e-18	246	77.4	79
TRINITY_DN27272_c1_g1	XP_019773319.1	PREDICTED: tensin-1 isoform X6 [Dendroctonus ponderosae]	1552	0	7156	91.2	92
TRINITY_DN23921_c1_g2	ENN75180.1	hypothetical protein YQE_08293, partial [Dendroctonus ponderosae]	166	6.5e-82	794	97.6	99.4
TRINITY_DN26522_c1_g5	ENN71197.1	hypothetical protein YQE_12126, partial [Dendroctonus ponderosae]	100	2.6e-47	494	97	98
TRINITY_DN18456_c0_g1	XP_019769501.1	PREDICTED: uncharacterized protein LOC109543980 [Dendroctonus ponderosae]	336	6.2e-168	1539	92	94.9
TRINITY_DN21418_c0_g3	XP_019770090.1	PREDICTED: uncharacterized protein LOC109544393 [Dendroctonus ponderosae]	656	0	3337	96.5	98.2
TRINITY_DN26627_c1_g1	ERL92236.1	hypothetical protein D910_09553 [Dendroctonus ponderosae]	1652	0	5481	83.4	86
TRINITY_DN17968_c0_g1	XP_019773385.1	PREDICTED: adult-specific rigid cuticular protein 15.7 [Dendroctonus ponderosae]	103	4.7e-36	398	73.8	83.5
TRINITY_DN19915_c0_g1	XP_019762865.1	PREDICTED: uncharacterized protein LOC109539526 isoform X1 [Dendroctonus ponderosae]	279	3.8e-82	799	86.4	88.2
TRINITY_DN21844_c2_g2	PCG69477.1	hypothetical protein B5V51_4051 [Heliothis virescens]	75	5.2e-12	188	45.3	70.7
TRINITY_DN35729_c0_g1	KRX33489.1	Chlorophyll a-b binding protein CP29.1, chloroplastic, partial [Trichinella sp. T9]	57	4.4e-23	283	94.7	96.5
TRINITY_DN19889_c0_g1	ERL95558.1	hypothetical protein D910_12819 [Dendroctonus ponderosae]	176	1.4e-80	784	91.5	92.6
TRINITY_DN18499_c0_g1	XP_028154676.1	uncharacterized protein LOC114348278, partial [Diabrotica virgifera virgifera]	107	1.9e-08	159	35.5	53.3
TRINITY_DN25364_c1_g3	ENN78445.1	hypothetical protein YQE_05083, partial [Dendroctonus ponderosae]	221	2e-110	1042	94.1	98.2
TRINITY_DN23887_c0_g2	XP_017770071.1	PREDICTED: protein Shroom-like isoform X2 [Nicrophorus vespilloides]	30	9.3e-06	135	96.7	96.7
TRINITY_DN21643_c0_g2	XP_019761888.1	PREDICTED: mitochondrial cardiolipin hydrolase-like [Dendroctonus ponderosae] >ENN76041.1 hypothetical protein YQE_07414, partial [Dendroctonus ponderosae] >ERL90738.1 hypothetical protein D910_08085 [Dendroctonus ponderosae]	225	5.3e-116	1094	89.8	95.1
TRINITY_DN23627_c0_g1	XP_019762575.1	PREDICTED: uncharacterized protein LOC109539337 [Dendroctonus ponderosae]	1605	0	3060	62.7	64.6
TRINITY_DN22399_c1_g1	XP_019771607.1	PREDICTED: protein charybde-like [Dendroctonus ponderosae] >ENN70517.1 hypothetical protein YQE_12693, partial [Dendroctonus ponderosae]	237	3.9e-134	1252	99.2	100
TRINITY_DN35975_c0_g1	XP_002647900.1	Hypothetical protein CBG23766 [Caenorhabditis briggsae] >CAP20532.1 Protein CBG23766 [Caenorhabditis briggsae]	73	3.4e-21	267	67.1	83.6
TRINITY_DN22043_c1_g9	XP_019757976.1	PREDICTED: uncharacterized protein LOC109536273 isoform X8 [Dendroctonus ponderosae]	69	9.7e-25	304	89.9	92.8
TRINITY_DN25512_c0_g2	ERL95113.1	hypothetical protein D910_12383 [Dendroctonus ponderosae]	81	4.8e-27	322	69.1	85.2
TRINITY_DN20366_c0_g2	XP_019761145.1	PREDICTED: GTP-binding protein 128up [Dendroctonus ponderosae] >AEE62672.1 unknown [Dendroctonus ponderosae] >ENN76551.1 hypothetical protein YQE_07002, partial [Dendroctonus ponderosae] >ERL90996.1 hypothetical protein D910_08338 [Dendroctonus ponderosae]	367	4.7e-210	1903	100	100
TRINITY_DN27646_c3_g1	KXJ82633.1	hypothetical protein RP20_CCG012365 [Aedes albopictus]	820	1.9e-190	1736	41.1	63
TRINITY_DN7767_c0_g1	ABN46996.1	somatolactin alpha [Ctenopharyngodon idella]	235	5.1e-132	1229	99.6	99.6
TRINITY_DN21919_c0_g1	XP_019767133.1	PREDICTED: putative leucine-rich repeat-containing protein DDB_G0290503 [Dendroctonus ponderosae]	846	8.9e-178	1627	58.3	60.8
TRINITY_DN19453_c0_g1	XP_019761712.1	PREDICTED: arginine-hydroxylase NDUFAF5, mitochondrial [Dendroctonus ponderosae] >AEE62256.1 unknown [Dendroctonus ponderosae] >ENN76123.1 hypothetical protein YQE_07343, partial [Dendroctonus ponderosae] >ERL87526.1 hypothetical protein D910_04917 [Dendroctonus ponderosae]	209	1.9e-110	1043	96.2	97.1
TRINITY_DN30941_c0_g1	NP_002629.1	elafin preproprotein [Homo sapiens] >NP_001129323.1 elafin precursor [Pan troglodytes] >XP_003825998.1 elafin [Pan paniscus] >P19957.3 RecName: Full=Elafin; AltName: Full=Elastase-specific inhibitor; Short=ESI; AltName: Full=Peptidase inhibitor 3; Short=PI-3; AltName: Full=Protease inhibitor WAP3; AltName: Full=Skin-derived antileukoproteinase; Short=SKALP; AltName: Full=WAP four-disulfide core d…	112	5.1e-32	362	100	100
TRINITY_DN22000_c0_g1	ENN72265.1	hypothetical protein YQE_11126, partial [Dendroctonus ponderosae]	216	7.6e-121	1133	98.6	100
TRINITY_DN33274_c0_g1	XP_014099927.1	PREDICTED: protein aurora borealis [Bactrocera oleae]	87	1.4e-09	171	44.8	64.4
TRINITY_DN16373_c0_g1	ERL91634.1	hypothetical protein D910_08964 [Dendroctonus ponderosae]	69	1.4e-11	184	100	100
TRINITY_DN18250_c0_g2	ENN73974.1	hypothetical protein YQE_09430, partial [Dendroctonus ponderosae]	111	2.1e-54	555	95.5	99.1
TRINITY_DN27640_c3_g1	ENN71867.1	hypothetical protein YQE_11482, partial [Dendroctonus ponderosae]	1099	0	3068	78.2	79.3
TRINITY_DN23681_c0_g1	ERL91624.1	hypothetical protein D910_08954 [Dendroctonus ponderosae]	376	2.2e-210	1905	93.9	97.1
TRINITY_DN20713_c1_g6	KZR96689.1	Uncharacterized protein APZ42_008836, partial [Daphnia magna]	37	2.2e-06	141	64.9	75.7
TRINITY_DN21238_c0_g2	XP_019770510.1	PREDICTED: pancreatic triacylglycerol lipase [Dendroctonus ponderosae]	362	1.5e-206	1873	96.1	96.7
TRINITY_DN22124_c0_g1	ENN81142.1	hypothetical protein YQE_02509, partial [Dendroctonus ponderosae] >ERL84539.1 hypothetical protein D910_01969 [Dendroctonus ponderosae]	53	3e-15	222	83	86.8
TRINITY_DN23929_c0_g7	ENN79154.1	hypothetical protein YQE_04340, partial [Dendroctonus ponderosae] >ERL89035.1 hypothetical protein D910_06413 [Dendroctonus ponderosae]	37	3.8e-11	184	97.3	97.3
TRINITY_DN27400_c3_g6	XP_012234580.1	PREDICTED: RNA-directed DNA polymerase from mobile element jockey-like [Linepithema humile]	217	4.6e-82	797	68.2	79.3
TRINITY_DN18443_c0_g1	XP_019760395.1	PREDICTED: GTP:AMP phosphotransferase AK3, mitochondrial [Dendroctonus ponderosae] >ENN76868.1 hypothetical protein YQE_06709, partial [Dendroctonus ponderosae] >ERL94644.1 hypothetical protein D910_11919 [Dendroctonus ponderosae]	145	2e-75	741	97.9	99.3
TRINITY_DN31466_c0_g1	XP_011567306.1	PREDICTED: uncharacterized protein LOC105396995 [Plutella xylostella]	73	1.8e-25	304	82.2	93.2
TRINITY_DN13183_c0_g3	NP_001162437.1	protein disulfide-isomerase A3 precursor [Papio anubis] >NP_001182645.1 protein disulfide-isomerase A3 precursor [Macaca mulatta] >XP_005559435.1 PREDICTED: protein disulfide-isomerase A3 isoform X1 [Macaca fascicularis] >XP_008015011.1 PREDICTED: protein disulfide-isomerase A3 [Chlorocebus sabaeus] >XP_010383550.1 PREDICTED: protein disulfide-isomerase A3 [Rhinopithecus roxellana] >XP_028688726.…	80	7.1e-40	430	100	100
TRINITY_DN21606_c0_g1	ENN75426.1	hypothetical protein YQE_07977, partial [Dendroctonus ponderosae] >ERL94153.1 hypothetical protein D910_11435 [Dendroctonus ponderosae]	494	1.3e-274	2461	93.1	96.4
TRINITY_DN19336_c0_g2	ERL86476.1	hypothetical protein D910_03882 [Dendroctonus ponderosae]	342	2e-163	1500	88.6	93.3
TRINITY_DN17989_c0_g1	XP_019756716.1	PREDICTED: uncharacterized protein LOC109535268 [Dendroctonus ponderosae]	186	1.3e-83	809	83.3	92.5
TRINITY_DN28368_c0_g1	XP_009014890.1	hypothetical protein HELRODRAFT_156780 [Helobdella robusta] >ESO06794.1 hypothetical protein HELRODRAFT_156780 [Helobdella robusta]	74	8.3e-18	238	59.5	74.3
TRINITY_DN25833_c0_g1	XP_019764455.1	PREDICTED: tyrosine-protein kinase Src42A-like [Dendroctonus ponderosae]	766	0	3833	99.1	99.5
TRINITY_DN20931_c2_g7	KRX52181.1	hypothetical protein T09_2865 [Trichinella sp. T9]	37	8.5e-06	136	73	78.4
TRINITY_DN26459_c1_g1	XP_019772783.1	PREDICTED: uncharacterized protein LOC109546305, partial [Dendroctonus ponderosae]	72	3.2e-31	354	91.7	94.4
TRINITY_DN25683_c0_g1	XP_019756223.1	PREDICTED: anillin-like isoform X1 [Dendroctonus ponderosae]	329	5.6e-185	1688	96.4	98.2
TRINITY_DN15518_c0_g2	NP_001128842.1	polyadenylate-binding protein 1 [Pongo abelii] >Q5R8F7.1 RecName: Full=Polyadenylate-binding protein 1; Short=PABP-1; Short=Poly(A)-binding protein 1 >CAH91953.1 hypothetical protein [Pongo abelii]	423	9.6e-233	2098	100	100
TRINITY_DN24599_c1_g3	PZC78267.1	hypothetical protein B5X24_HaOG202339 [Helicoverpa armigera]	255	8.7e-38	416	38.4	54.9
TRINITY_DN21090_c0_g1	XP_019773151.1	PREDICTED: peroxisomal membrane protein PEX14 isoform X2 [Dendroctonus ponderosae]	163	5.5e-64	644	81.6	84.7
TRINITY_DN23439_c0_g2	ERL93134.1	hypothetical protein D910_10435 [Dendroctonus ponderosae]	112	1.2e-60	609	94.6	99.1
TRINITY_DN21223_c0_g7	ENN75855.1	hypothetical protein YQE_07584, partial [Dendroctonus ponderosae] >ERL88838.1 hypothetical protein D910_06220, partial [Dendroctonus ponderosae]	251	2.2e-119	1121	88.8	92
TRINITY_DN23690_c0_g1	XP_018908817.1	PREDICTED: uncharacterized protein LOC109038256 [Bemisia tabaci]	386	1e-75	744	44	56.5
TRINITY_DN11536_c1_g1	XP_027146760.1	plastin-2 [Larimichthys crocea]	96	2e-45	477	100	100
TRINITY_DN15652_c0_g1	AEE62605.1	unknown [Dendroctonus ponderosae]	187	2.9e-98	938	97.3	97.9
TRINITY_DN20419_c2_g1	XP_019771746.1	PREDICTED: sugar transporter SWEET1 [Dendroctonus ponderosae] >XP_019771747.1 PREDICTED: sugar transporter SWEET1 [Dendroctonus ponderosae] >AEE62417.1 unknown [Dendroctonus ponderosae] >ENN70356.1 hypothetical protein YQE_12864, partial [Dendroctonus ponderosae]	232	1.2e-118	1114	97.4	98.7
TRINITY_DN17007_c0_g1	EGT41510.1	hypothetical protein CAEBREN_08694 [Caenorhabditis brenneri]	125	5.9e-27	320	48	64.8
TRINITY_DN11627_c0_g1	TKS89206.1	H-2 class I histocompatibility antigen, L-D alpha chain [Collichthys lucidus] >TKS89216.1 H-2 class I histocompatibility antigen, L-D alpha chain [Collichthys lucidus]	101	2.4e-49	511	94.1	98
TRINITY_DN23411_c1_g2	XP_019756113.1	PREDICTED: protein hunchback-like [Dendroctonus ponderosae]	422	4.8e-64	645	49.3	54.7
TRINITY_DN15232_c0_g1	XP_019773284.1	PREDICTED: midasin-like [Dendroctonus ponderosae]	197	1.3e-93	896	87.8	92.4
TRINITY_DN22333_c0_g3	ERL86083.1	hypothetical protein D910_03497 [Dendroctonus ponderosae]	443	8.6e-237	2136	90.1	94.4
TRINITY_DN18766_c0_g1	ENN77259.1	hypothetical protein YQE_06088, partial [Dendroctonus ponderosae]	493	1.1e-270	2427	94.3	96.1
TRINITY_DN15549_c0_g1	XP_019765010.1	PREDICTED: uncharacterized protein LOC109540911 [Dendroctonus ponderosae] >ENN74086.1 hypothetical protein YQE_09059, partial [Dendroctonus ponderosae] >ERL94217.1 hypothetical protein D910_11498 [Dendroctonus ponderosae]	272	1.6e-102	974	72.8	78.7
TRINITY_DN23970_c0_g1	XP_019769730.1	PREDICTED: TM2 domain-containing protein CG11103 [Dendroctonus ponderosae] >ENN71548.1 hypothetical protein YQE_11776, partial [Dendroctonus ponderosae] >ERL87981.1 hypothetical protein D910_05369 [Dendroctonus ponderosae]	175	2.8e-99	949	98.3	99.4
TRINITY_DN19523_c0_g1	ERL88698.1	hypothetical protein D910_06080 [Dendroctonus ponderosae]	378	1.1e-121	1141	68.8	78.3
TRINITY_DN25370_c0_g6	XP_019773560.1	PREDICTED: cytochrome P450 4C1-like [Dendroctonus ponderosae] >XP_019773561.1 PREDICTED: cytochrome P450 4C1-like [Dendroctonus ponderosae]	99	7e-47	491	88.9	94.9
TRINITY_DN17428_c0_g3	ODM94555.1	Solute carrier family 41 member 2 [Orchesella cincta]	426	9.9e-58	590	37.1	53.3
TRINITY_DN23609_c0_g4	XP_019755309.1	PREDICTED: uncharacterized protein LOC109534176 [Dendroctonus ponderosae]	568	0	2965	97	98.4
TRINITY_DN29650_c0_g1	XP_013295221.1	amidohydrolase family protein, partial [Necator americanus] >ETN72994.1 amidohydrolase family protein, partial [Necator americanus]	86	2.5e-07	148	40.7	57
TRINITY_DN20777_c0_g1	XP_019773221.1	PREDICTED: mitochondrial basic amino acids transporter-like [Dendroctonus ponderosae]	187	4.2e-95	913	92.5	96.3
TRINITY_DN26131_c0_g1	XP_019759406.1	PREDICTED: nucleolar protein 9 [Dendroctonus ponderosae] >ENN77504.1 hypothetical protein YQE_06030, partial [Dendroctonus ponderosae]	576	0	2791	94.8	97.6
TRINITY_DN21023_c0_g3	XP_025421185.1	uncharacterized protein LOC112691244, partial [Sipha flava]	50	1.6e-06	141	52	66
TRINITY_DN18480_c0_g1	XP_019761918.1	PREDICTED: uncharacterized protein LOC109538918 [Dendroctonus ponderosae]	99	5.5e-17	232	52.5	65.7
TRINITY_DN21895_c0_g5	ENN75309.1	hypothetical protein YQE_08086, partial [Dendroctonus ponderosae]	172	5e-87	838	97.1	97.7
TRINITY_DN26621_c1_g1	XP_019756639.1	PREDICTED: platelet-derived growth factor receptor beta isoform X1 [Dendroctonus ponderosae]	326	1.4e-177	1623	90.8	95.7
TRINITY_DN21287_c2_g1	ENN77108.1	hypothetical protein YQE_06443, partial [Dendroctonus ponderosae] >ERL92912.1 hypothetical protein D910_10217 [Dendroctonus ponderosae]	212	5.9e-89	860	76.9	77.4
TRINITY_DN24112_c2_g3	ERL87805.1	hypothetical protein D910_05194 [Dendroctonus ponderosae]	96	6e-29	342	74	79.2
TRINITY_DN20620_c0_g3	AEE62874.1	unknown [Dendroctonus ponderosae]	146	1.1e-75	742	89.7	95.2
TRINITY_DN27438_c2_g1	XP_019773581.1	PREDICTED: ceramide phosphoethanolamine synthase [Dendroctonus ponderosae] >XP_019773582.1 PREDICTED: ceramide phosphoethanolamine synthase [Dendroctonus ponderosae] >XP_019773583.1 PREDICTED: ceramide phosphoethanolamine synthase [Dendroctonus ponderosae] >XP_019773584.1 PREDICTED: ceramide phosphoethanolamine synthase [Dendroctonus ponderosae] >XP_019773585.1 PREDICTED: ceramide phosphoethanola…	345	4.8e-187	1710	95.1	96.8
TRINITY_DN20169_c2_g4	ENN73772.1	hypothetical protein YQE_09625, partial [Dendroctonus ponderosae]	41	1.5e-12	194	92.7	97.6
TRINITY_DN18991_c0_g1	XP_019757193.1	PREDICTED: neuroglobin-like [Dendroctonus ponderosae]	189	8.1e-101	962	98.4	98.9
TRINITY_DN27101_c0_g3	ENN77562.1	hypothetical protein YQE_05858, partial [Dendroctonus ponderosae]	67	4.4e-30	347	91	95.5
TRINITY_DN20825_c1_g3	XP_022908431.1	uncharacterized protein LOC111419767 [Onthophagus taurus] >XP_022905467.1 uncharacterized protein LOC111417429 [Onthophagus taurus] >XP_022905468.1 uncharacterized protein LOC111417430 [Onthophagus taurus] >XP_022912205.1 uncharacterized protein LOC111423190 [Onthophagus taurus] >XP_022913494.1 uncharacterized protein LOC111424242 [Onthophagus taurus]	116	2.5e-12	192	41.4	53.4
TRINITY_DN12852_c0_g1	KRT86122.1	Homeobox domain-containing protein [Oryctes borbonicus]	118	1.3e-33	376	78	79.7
TRINITY_DN22079_c3_g5	ENN80713.1	hypothetical protein YQE_02867, partial [Dendroctonus ponderosae]	72	5.6e-24	291	90.3	93.1
TRINITY_DN26602_c0_g6	XP_018570189.1	uncharacterized protein LOC108910147 [Anoplophora glabripennis]	87	5.8e-14	207	43.7	60.9
TRINITY_DN9917_c0_g1	XP_019760124.1	PREDICTED: SCY1-like protein 2 [Dendroctonus ponderosae]	314	3.6e-171	1567	100	100
TRINITY_DN27091_c0_g2	XP_019759047.1	PREDICTED: muscle M-line assembly protein unc-89-like [Dendroctonus ponderosae]	327	2.3e-182	1663	96.9	97.6
TRINITY_DN23171_c0_g1	XP_019769887.1	PREDICTED: exocyst complex component 2 [Dendroctonus ponderosae] >ENN71455.1 hypothetical protein YQE_11873, partial [Dendroctonus ponderosae] >ERL92572.1 hypothetical protein D910_09885 [Dendroctonus ponderosae]	883	0	4510	98.2	99.3
TRINITY_DN21082_c1_g5	ERL93526.1	hypothetical protein D910_10815 [Dendroctonus ponderosae]	74	1.5e-17	238	68.9	79.7
TRINITY_DN6607_c0_g1	XP_019763930.1	PREDICTED: uncharacterized protein LOC109540150 [Dendroctonus ponderosae]	201	1.7e-102	973	98.5	99
TRINITY_DN17434_c0_g2	XP_019770937.1	PREDICTED: farnesol dehydrogenase-like [Dendroctonus ponderosae]	114	7.8e-54	551	93	99.1
TRINITY_DN27907_c0_g1	XP_017081631.1	PREDICTED: peroxiredoxin-like protein DDB_G0282517, mitochondrial [Drosophila eugracilis]	49	1.1e-08	159	61.2	75.5
TRINITY_DN20679_c1_g5	VDK76400.1	unnamed protein product [Anisakis simplex]	64	2.6e-07	155	46.9	70.3
TRINITY_DN24381_c0_g3	ERL92838.1	hypothetical protein D910_10145 [Dendroctonus ponderosae]	557	2.1e-224	2027	83.1	85.6
TRINITY_DN16376_c0_g2	XP_019771126.1	PREDICTED: uncharacterized protein LOC109545074 [Dendroctonus ponderosae]	98	4.8e-28	328	60.2	75.5
TRINITY_DN23790_c2_g1	ENN82729.1	hypothetical protein YQE_00903, partial [Dendroctonus ponderosae]	138	1.1e-73	727	97.8	98.6
TRINITY_DN25784_c0_g5	XP_013187415.1	PREDICTED: uncharacterized protein LOC106132513 [Amyelois transitella]	83	8.4e-12	187	48.2	66.3
TRINITY_DN23038_c0_g1	XP_019772714.1	PREDICTED: transmembrane protein 135-like [Dendroctonus ponderosae]	112	4.6e-49	509	92.9	97.3
TRINITY_DN24907_c1_g3	GBP52930.1	hypothetical protein EVAR_47585_1 [Eumeta japonica]	60	6.8e-06	136	50	63.3
TRINITY_DN10691_c0_g1	XP_019764356.1	PREDICTED: uncharacterized protein LOC109540431 [Dendroctonus ponderosae]	102	6.6e-34	378	77.5	84.3
TRINITY_DN12272_c0_g1	ENN74322.1	hypothetical protein YQE_09293, partial [Dendroctonus ponderosae]	186	2.2e-96	919	91.4	95.7
TRINITY_DN34121_c0_g1	ENN77069.1	hypothetical protein YQE_06404, partial [Dendroctonus ponderosae]	67	3.9e-21	267	67.2	88.1
TRINITY_DN20078_c0_g1	XP_026824291.1	uncharacterized protein LOC113561689 [Ooceraea biroi] >XP_026824293.1 uncharacterized protein LOC113561691 [Ooceraea biroi]	56	8.8e-09	163	53.6	67.9
TRINITY_DN22054_c3_g1	ENN71543.1	hypothetical protein YQE_11771, partial [Dendroctonus ponderosae]	42	8.8e-10	170	78.6	83.3
TRINITY_DN19351_c0_g1	XP_019767977.1	PREDICTED: uncharacterized protein LOC109542950 [Dendroctonus ponderosae]	545	4.6e-179	1636	67.9	77.1
TRINITY_DN18590_c0_g2	XP_019769334.1	PREDICTED: adenylate kinase 7-like [Dendroctonus ponderosae]	465	4.2e-237	2136	93.8	95.7
TRINITY_DN23783_c3_g1	ENN77996.1	hypothetical protein YQE_05516, partial [Dendroctonus ponderosae]	247	1.1e-138	1289	97.2	98.4
TRINITY_DN22746_c0_g1	XP_019754202.1	PREDICTED: juvenile hormone epoxide hydrolase 1-like [Dendroctonus ponderosae]	270	5.6e-148	1368	95.2	98.1
TRINITY_DN26693_c0_g2	XP_019773672.1	PREDICTED: ATP-binding cassette sub-family G member 4-like [Dendroctonus ponderosae]	443	3e-236	2133	95	96.4
TRINITY_DN5049_c0_g1	XP_019754953.1	PREDICTED: uncharacterized protein LOC109533886 [Dendroctonus ponderosae] >ENN80334.1 hypothetical protein YQE_03326, partial [Dendroctonus ponderosae] >ERL94770.1 hypothetical protein D910_12044 [Dendroctonus ponderosae]	261	1.4e-104	993	78.2	86.6
TRINITY_DN26400_c1_g1	XP_019758139.1	PREDICTED: ribosome-binding protein 1 isoform X2 [Dendroctonus ponderosae]	1038	1.9e-270	2428	59.2	62.4
TRINITY_DN20231_c0_g1	XP_019756185.1	PREDICTED: cyclin-related protein FAM58A [Dendroctonus ponderosae] >AEE61842.1 unknown [Dendroctonus ponderosae] >ENN79461.1 hypothetical protein YQE_04105, partial [Dendroctonus ponderosae] >ERL91750.1 hypothetical protein D910_09076 [Dendroctonus ponderosae]	195	1.4e-96	925	89.7	93.3
TRINITY_DN9273_c0_g1	XP_019755944.1	PREDICTED: uncharacterized protein LOC109534646 [Dendroctonus ponderosae]	71	7.2e-22	276	76.1	84.5
TRINITY_DN27211_c1_g2	XP_019771754.1	PREDICTED: lysyl oxidase homolog 2-like [Dendroctonus ponderosae]	230	2.1e-113	1068	88.7	90
TRINITY_DN24108_c0_g4	ERL95480.1	hypothetical protein D910_12742 [Dendroctonus ponderosae]	309	9.1e-167	1534	92.9	97.7
TRINITY_DN32508_c0_g1	XP_019763615.1	PREDICTED: protein commissureless 2 homolog isoform X2 [Dendroctonus ponderosae]	69	1.6e-31	356	97.1	98.6
TRINITY_DN20466_c0_g1	AEE63428.1	unknown [Dendroctonus ponderosae]	349	9.5e-181	1650	90.3	92
TRINITY_DN20129_c0_g2	XP_025264891.1	uncharacterized protein LOC112638075 [Camponotus floridanus]	127	7.9e-23	283	44.1	62.2
TRINITY_DN22289_c0_g6	GBP02291.1	hypothetical protein EVAR_1729_1 [Eumeta japonica]	101	3.1e-07	150	40.6	49.5
TRINITY_DN23769_c2_g2	ENN72881.1	hypothetical protein YQE_10451, partial [Dendroctonus ponderosae]	51	1.9e-06	142	56.9	68.6
TRINITY_DN23674_c0_g2	XP_019755444.1	PREDICTED: neutral and basic amino acid transport protein rBAT-like [Dendroctonus ponderosae] >XP_019756693.1 PREDICTED: neutral and basic amino acid transport protein rBAT-like [Dendroctonus ponderosae]	494	4.8e-275	2464	95.3	97.4
TRINITY_DN28862_c0_g1	XP_019764544.1	PREDICTED: nephrin [Dendroctonus ponderosae]	69	1.2e-31	358	97.1	97.1
TRINITY_DN36052_c0_g1	AAH01491.1	Heme oxygenase (decycling) 1 [Homo sapiens] >ABM83236.1 heme oxygenase (decycling) 1 [synthetic construct] >ABM86436.1 heme oxygenase (decycling) 1, partial [synthetic construct] >AIC54561.1 HMOX1, partial [synthetic construct] >SJX32962.1 unnamed protein product, partial [Human ORFeome Gateway entry vector]	79	3e-39	423	100	100
TRINITY_DN13285_c0_g1	XP_017703394.1	PREDICTED: 40S ribosomal protein S27-like [Rhinopithecus bieti]	92	4.7e-47	491	98.9	98.9
TRINITY_DN23100_c0_g1	XP_019767491.1	PREDICTED: protein KRI1 homolog isoform X2 [Dendroctonus ponderosae]	844	9.2e-230	2075	73.2	77
TRINITY_DN26232_c0_g1	XP_019772816.1	PREDICTED: uncharacterized protein LOC109546341, partial [Dendroctonus ponderosae]	249	1e-121	1140	92.4	94.4
TRINITY_DN25970_c0_g9	XP_019757453.1	PREDICTED: syntaxin-12 [Dendroctonus ponderosae] >ENN78591.1 hypothetical protein YQE_04958, partial [Dendroctonus ponderosae] >ERL91476.1 hypothetical protein D910_08806 [Dendroctonus ponderosae]	238	1.3e-103	985	86.6	88.7
TRINITY_DN27583_c3_g1	XP_019766366.1	PREDICTED: aryl hydrocarbon receptor nuclear translocator-like protein 1 [Dendroctonus ponderosae]	524	9e-273	2447	92.4	94.7
TRINITY_DN12626_c0_g1	XP_004282758.1	PREDICTED: 60S ribosomal protein L23 [Orcinus orca]	134	9.6e-70	688	100	100
TRINITY_DN24806_c0_g3	XP_019766965.1	PREDICTED: uridine-cytidine kinase-like 1 [Dendroctonus ponderosae] >ENN73178.1 hypothetical protein YQE_10232, partial [Dendroctonus ponderosae]	127	1e-65	654	98.4	100
TRINITY_DN20752_c2_g1	ERL93372.1	hypothetical protein D910_10664 [Dendroctonus ponderosae]	281	4.1e-150	1385	96.8	99.6
TRINITY_DN23348_c0_g3	XP_019771302.1	PREDICTED: paternally-expressed gene 3 protein-like [Dendroctonus ponderosae]	328	4.2e-89	859	97.6	97.6
TRINITY_DN16239_c0_g2	XP_010743081.1	60S ribosomal protein L13 [Larimichthys crocea] >TKS70166.1 60S ribosomal protein L13 [Collichthys lucidus] >TMS12947.1 hypothetical protein E3U43_018022 [Larimichthys crocea]	101	3.8e-48	501	100	100
TRINITY_DN27628_c1_g3	XP_018908817.1	PREDICTED: uncharacterized protein LOC109038256 [Bemisia tabaci]	90	8.2e-22	278	53.3	72.2
TRINITY_DN17044_c0_g1	XP_019759475.1	PREDICTED: protein transport protein Sec61 subunit beta [Dendroctonus ponderosae] >ENN77290.1 hypothetical protein YQE_06116, partial [Dendroctonus ponderosae] >ERL93160.1 hypothetical protein D910_10457 [Dendroctonus ponderosae]	95	6.5e-32	363	100	100
TRINITY_DN19812_c0_g1	XP_019772745.1	PREDICTED: putative protein kinase C delta type homolog isoform X8 [Dendroctonus ponderosae]	176	5.4e-102	971	98.3	99.4
TRINITY_DN24663_c1_g5	XP_019761249.1	PREDICTED: probable ATP-dependent RNA helicase YTHDC2 isoform X3 [Dendroctonus ponderosae]	1245	0	6026	93.7	96.1
TRINITY_DN22247_c2_g1	XP_966415.1	PREDICTED: actin, muscle [Tribolium castaneum] >XP_008199969.1 PREDICTED: actin, muscle [Tribolium castaneum] >XP_008199982.1 PREDICTED: actin, muscle [Tribolium castaneum] >XP_018567750.1 actin, muscle-like [Anoplophora glabripennis] >XP_018567752.1 actin, muscle-like [Anoplophora glabripennis] >XP_018567753.1 actin, muscle-like [Anoplophora glabripennis] >XP_019877817.1 PREDICTED: actin, muscle…	194	4.1e-108	1025	100	100
TRINITY_DN26382_c1_g1	XP_019765260.1	PREDICTED: insulin-like receptor [Dendroctonus ponderosae]	1678	0	6916	80.9	81.9
TRINITY_DN20155_c1_g3	XP_015515445.1	PREDICTED: uncharacterized protein LOC107221084, partial [Neodiprion lecontei]	156	2.1e-42	453	51.3	69.2
TRINITY_DN21002_c0_g2	XP_019753939.1	PREDICTED: DEAD-box helicase Dbp80 [Dendroctonus ponderosae]	441	2.9e-241	2174	94.6	98
TRINITY_DN22838_c0_g2	XP_019755693.1	PREDICTED: TPPP family protein CG45057-like [Dendroctonus ponderosae] >XP_019755694.1 PREDICTED: TPPP family protein CG45057-like [Dendroctonus ponderosae] >ENN79779.1 hypothetical protein YQE_03835, partial [Dendroctonus ponderosae] >ERL91604.1 hypothetical protein D910_08934 [Dendroctonus ponderosae]	56	9.3e-18	240	87.5	91.1
TRINITY_DN24744_c0_g1	XP_018568217.1	protein fuzzy homolog isoform X1 [Anoplophora glabripennis]	111	8.3e-40	430	72.1	89.2
TRINITY_DN17942_c0_g1	ENN76705.1	hypothetical protein YQE_06770, partial [Dendroctonus ponderosae]	220	4.2e-87	842	93.2	95.5
TRINITY_DN24508_c0_g2	ENN78871.1	hypothetical protein YQE_04660, partial [Dendroctonus ponderosae]	70	1.6e-21	275	80	90
TRINITY_DN24265_c0_g1	AEE61981.1	unknown [Dendroctonus ponderosae]	306	1.9e-168	1544	93.5	98.7
TRINITY_DN20527_c0_g1	XP_019773117.1	PREDICTED: homeobox protein engrailed-1a-like [Dendroctonus ponderosae] >ENN81669.1 hypothetical protein YQE_01922, partial [Dendroctonus ponderosae]	360	1.8e-182	1666	92.5	94.7
TRINITY_DN34196_c0_g1	XP_001870069.1	26S proteasome non-ATPase regulatory subunit 2 [Culex quinquefasciatus] >EDS31477.1 26S proteasome non-ATPase regulatory subunit 2 [Culex quinquefasciatus]	79	1.1e-25	306	70.9	86.1
TRINITY_DN15330_c0_g1	XP_017839768.1	PREDICTED: uncharacterized protein LOC108597634 isoform X1 [Drosophila busckii] >ALC42593.1 RhoGAP54D [Drosophila busckii]	283	9.3e-15	219	26.1	48.1
TRINITY_DN27300_c1_g11	XP_018569800.1	uncharacterized protein LOC108909853 [Anoplophora glabripennis]	89	7.1e-14	210	43.8	57.3
TRINITY_DN25294_c0_g2	XP_019758173.1	PREDICTED: ras-related protein Rab-1A [Dendroctonus ponderosae] >AEE62063.1 unknown [Dendroctonus ponderosae] >ENN78165.1 hypothetical protein YQE_05318, partial [Dendroctonus ponderosae] >ERL92449.1 hypothetical protein D910_09763 [Dendroctonus ponderosae]	33	1.1e-10	177	100	100
TRINITY_DN22926_c0_g2	ENN83487.1	hypothetical protein YQE_00155, partial [Dendroctonus ponderosae]	490	8.2e-220	1988	84.7	88.6
TRINITY_DN21047_c1_g7	GBP03031.1	hypothetical protein EVAR_2191_1 [Eumeta japonica]	69	1.1e-15	220	69.6	73.9
TRINITY_DN24122_c1_g2	XP_019762909.1	PREDICTED: histone-lysine N-methyltransferase 2E isoform X1 [Dendroctonus ponderosae]	386	5.9e-145	1345	82.4	87
TRINITY_DN27231_c0_g5	XP_019772671.1	PREDICTED: prolyl 3-hydroxylase sudestada1 [Dendroctonus ponderosae]	545	8.2e-287	2566	89.2	92.3
TRINITY_DN24828_c0_g1	XP_019773598.1	PREDICTED: protein lingerer isoform X1 [Dendroctonus ponderosae]	1239	5.5e-280	2511	72.3	74.8
TRINITY_DN12055_c0_g3	ACB47119.1	cytochrome b, partial (mitochondrion) [Larimichthys crocea] >ACB47122.1 cytochrome b, partial (mitochondrion) [Larimichthys crocea]	88	2.2e-38	416	95.5	97.7
TRINITY_DN31485_c0_g1	NP_001268941.1	proline-rich protein 3 isoform c [Mus musculus] >NP_001268942.1 proline-rich protein 3 isoform c [Mus musculus] >NP_001268953.1 proline-rich protein 3 isoform c [Mus musculus] >BAE21436.1 unnamed protein product [Mus musculus]	47	6.5e-14	204	83	85.1
TRINITY_DN23437_c0_g1	XP_019760321.1	PREDICTED: monocarboxylate transporter 13-like [Dendroctonus ponderosae] >XP_019760322.1 PREDICTED: monocarboxylate transporter 13-like [Dendroctonus ponderosae] >XP_019760323.1 PREDICTED: monocarboxylate transporter 13-like [Dendroctonus ponderosae] >XP_019760324.1 PREDICTED: monocarboxylate transporter 13-like [Dendroctonus ponderosae]	715	0	3075	90.9	95.4
TRINITY_DN25557_c2_g3	XP_019769419.1	PREDICTED: uncharacterized protein LOC109543925 [Dendroctonus ponderosae] >AEE63446.1 unknown [Dendroctonus ponderosae] >ENN71676.1 hypothetical protein YQE_11600, partial [Dendroctonus ponderosae]	367	1.6e-173	1589	87.2	92.1
TRINITY_DN27369_c0_g2	XP_019758494.1	PREDICTED: cytosolic Fe-S cluster assembly factor NUBP2 homolog [Dendroctonus ponderosae] >AEE62335.1 unknown [Dendroctonus ponderosae] >ENN77901.1 hypothetical protein YQE_05578, partial [Dendroctonus ponderosae] >ERL88454.1 hypothetical protein D910_05840 [Dendroctonus ponderosae]	38	3.1e-10	174	94.7	100
TRINITY_DN25654_c1_g4	XP_019761402.1	PREDICTED: eukaryotic translation initiation factor 4 gamma 3-like isoform X4 [Dendroctonus ponderosae] >XP_019761403.1 PREDICTED: eukaryotic translation initiation factor 4 gamma 3-like isoform X4 [Dendroctonus ponderosae]	50	1.9e-11	189	72	76
TRINITY_DN15913_c0_g2	XP_023036495.1	modifier of mdg4 isoform X1 [Drosophila willistoni]	201	8.1e-06	141	28.4	42.3
TRINITY_DN15964_c0_g1	XP_019773165.1	PREDICTED: histone H2A.V [Dendroctonus ponderosae] >XP_019772234.1 PREDICTED: histone H2A.V [Dendroctonus ponderosae] >XP_019764742.1 PREDICTED: histone H2A.V [Dendroctonus ponderosae] >AEE61581.1 unknown [Dendroctonus ponderosae] >ENN74466.1 hypothetical protein YQE_08957, partial [Dendroctonus ponderosae]	103	2.2e-50	525	100	100
TRINITY_DN25222_c1_g1	ERL84251.1	hypothetical protein D910_01632 [Dendroctonus ponderosae] >ERL84312.1 hypothetical protein D910_01724 [Dendroctonus ponderosae]	694	4.2e-287	2572	74.6	77.2
TRINITY_DN20513_c5_g1	XP_019766939.1	PREDICTED: TGF-beta receptor type-1 isoform X4 [Dendroctonus ponderosae]	455	6.8e-253	2277	99.6	100
TRINITY_DN9888_c0_g1	ERL91190.1	hypothetical protein D910_08529 [Dendroctonus ponderosae]	646	0	2862	94.1	95.5
TRINITY_DN19872_c0_g1	XP_019753666.1	PREDICTED: uncharacterized protein LOC109532952 [Dendroctonus ponderosae] >AEE62809.1 unknown [Dendroctonus ponderosae] >ENN81102.1 hypothetical protein YQE_02470, partial [Dendroctonus ponderosae] >ERL85216.1 hypothetical protein D910_02637 [Dendroctonus ponderosae]	254	9.4e-138	1278	96.1	98.8
TRINITY_DN24229_c1_g1	XP_019768647.1	PREDICTED: uncharacterized protein LOC109543394 isoform X2 [Dendroctonus ponderosae]	834	0	2836	78.5	85.5
TRINITY_DN20436_c1_g1	XP_019760591.1	PREDICTED: ferrochelatase, mitochondrial [Dendroctonus ponderosae]	236	4.1e-132	1232	96.6	97.5
TRINITY_DN27460_c5_g1	XP_018564351.1	disco-interacting protein 2 isoform X5 [Anoplophora glabripennis]	1648	0	7111	87.5	91.3
TRINITY_DN16685_c0_g1	NP_034370.2	ferritin light chain 1 [Mus musculus] >XP_003689256.2 PREDICTED: ferritin light chain 1 [Mus musculus] >BAB21959.1 unnamed protein product [Mus musculus] >BAB21967.1 unnamed protein product [Mus musculus] >BAB27328.1 unnamed protein product [Mus musculus] >BAB27345.1 unnamed protein product [Mus musculus] >BAB27491.1 unnamed protein product [Mus musculus] >BAC40475.1 unnamed protein product [Mus …	183	9.5e-99	941	100	100
TRINITY_DN15825_c0_g2	ALK82314.1	ATP phosphoenolpyruvate carboxykinase, partial [Macrobrachium nipponense]	172	3.5e-95	909	95.3	100
TRINITY_DN21851_c0_g4	XP_019754948.1	PREDICTED: ralA-binding protein 1 [Dendroctonus ponderosae]	535	6.3e-286	2560	94.2	96.1
TRINITY_DN21211_c0_g10	EFN86884.1	hypothetical protein EAI_04021, partial [Harpegnathos saltator]	56	4e-14	209	67.9	83.9
TRINITY_DN22210_c3_g1	XP_019762356.1	PREDICTED: heat shock 70 kDa protein cognate 3 [Dendroctonus ponderosae] >XP_019762357.1 PREDICTED: heat shock 70 kDa protein cognate 3 [Dendroctonus ponderosae]	658	0	3152	99.5	99.8
TRINITY_DN18687_c0_g1	XP_019755547.1	PREDICTED: uncharacterized protein LOC109534340 [Dendroctonus ponderosae]	279	3.7e-148	1370	95.7	97.1
TRINITY_DN25961_c0_g1	XP_019763228.1	PREDICTED: aminopeptidase N-like [Dendroctonus ponderosae]	35	1.3e-07	153	82.9	85.7
TRINITY_DN24031_c0_g1	XP_019768243.1	PREDICTED: probable DNA mismatch repair protein Msh6 [Dendroctonus ponderosae]	1136	0	4802	89	90.5
TRINITY_DN17673_c0_g3	EDM12502.1	rCG48326, isoform CRA_b [Rattus norvegicus]	53	1.4e-11	184	71.7	73.6
TRINITY_DN6215_c0_g1	XP_019759849.1	PREDICTED: uncharacterized protein LOC109537515 [Dendroctonus ponderosae]	132	6.3e-66	655	96.2	96.2
TRINITY_DN21464_c0_g1	XP_019770724.1	PREDICTED: uncharacterized protein LOC109544812 [Dendroctonus ponderosae] >ENN70949.1 hypothetical protein YQE_12350, partial [Dendroctonus ponderosae] >ERL88180.1 hypothetical protein D910_05568 [Dendroctonus ponderosae]	412	1.2e-180	1651	74	84.2
TRINITY_DN25995_c1_g1	EZA48738.1	hypothetical protein X777_13150 [Ooceraea biroi]	178	1.1e-10	182	30.9	47.2
TRINITY_DN25362_c1_g1	XP_002754570.3	PREDICTED: heat shock cognate 71 kDa protein isoform X1 [Callithrix jacchus]	662	0	3195	99.1	99.4
TRINITY_DN21675_c1_g5	ENN81423.1	hypothetical protein YQE_02117, partial [Dendroctonus ponderosae] >ERL95471.1 hypothetical protein D910_12733 [Dendroctonus ponderosae]	124	1.6e-63	634	100	100
TRINITY_DN23739_c0_g1	XP_019772862.1	PREDICTED: EH domain-binding protein 1 isoform X3 [Dendroctonus ponderosae]	678	0	3331	96.6	97.9
TRINITY_DN14739_c0_g2	XP_022787937.1	ADP,ATP carrier protein 3, mitochondrial-like [Stylophora pistillata] >PFX27247.1 ADP,ATP carrier protein [Stylophora pistillata]	132	8.7e-47	490	73.5	82.6
TRINITY_DN27451_c2_g2	XP_019760199.1	PREDICTED: putative fatty acyl-CoA reductase CG8306 [Dendroctonus ponderosae] >ENN76996.1 hypothetical protein YQE_06490, partial [Dendroctonus ponderosae]	108	1.4e-39	433	73.1	84.3
TRINITY_DN20955_c0_g1	XP_019760728.1	PREDICTED: glutathione S-transferase-like [Dendroctonus ponderosae] >AEE62772.1 unknown [Dendroctonus ponderosae]	205	1.1e-108	1027	94.1	97.1
TRINITY_DN22559_c1_g2	ERL87872.1	hypothetical protein D910_05260 [Dendroctonus ponderosae]	476	2.9e-269	2414	97.7	98.7
TRINITY_DN19678_c1_g8	XP_017468086.1	PREDICTED: uncharacterized protein LOC108360341 [Rhagoletis zephyria]	111	1.8e-12	197	39.6	55.9
TRINITY_DN20313_c0_g2	ENN80213.1	hypothetical protein YQE_03357, partial [Dendroctonus ponderosae]	193	1.5e-98	939	91.2	94.8
TRINITY_DN23535_c0_g9	XP_019757342.1	PREDICTED: DNA N6-methyl adenine demethylase isoform X2 [Dendroctonus ponderosae]	385	8.5e-204	1848	90.1	94.8
TRINITY_DN16340_c0_g2	XP_019758748.1	PREDICTED: uncharacterized protein LOC109536799 [Dendroctonus ponderosae]	149	7.2e-65	649	85.9	91.9
TRINITY_DN24117_c0_g3	ERL92010.1	hypothetical protein D910_09332 [Dendroctonus ponderosae]	260	2.3e-139	1291	94.2	97.7
TRINITY_DN14404_c0_g1	XP_019878230.1	PREDICTED: uncharacterized protein LOC109606100 [Aethina tumida]	258	4.2e-14	213	29.1	48.8
TRINITY_DN24203_c2_g1	ERL88233.1	hypothetical protein D910_05621 [Dendroctonus ponderosae]	57	7.8e-16	221	80.7	87.7
TRINITY_DN2825_c0_g1	GBP02370.1	Inner membrane protein YtfF [Eumeta japonica]	69	4e-19	249	63.8	75.4
TRINITY_DN22723_c2_g1	ENN80893.1	hypothetical protein YQE_02682, partial [Dendroctonus ponderosae]	23	9.3e-06	136	100	100
TRINITY_DN36120_c0_g1	XP_018332324.1	glutaredoxin-C3 [Agrilus planipennis]	73	3.4e-12	190	50.7	69.9
TRINITY_DN21619_c1_g2	ENN77306.1	hypothetical protein YQE_06132, partial [Dendroctonus ponderosae]	72	3.1e-33	374	90.3	95.8
TRINITY_DN25572_c2_g2	XP_019772777.1	PREDICTED: zinc finger and SCAN domain-containing protein 22-like [Dendroctonus ponderosae]	302	4.1e-133	1240	97.4	97.7
TRINITY_DN22855_c0_g1	XP_019761950.1	PREDICTED: U3 small nucleolar ribonucleoprotein protein MPP10-like [Dendroctonus ponderosae] >ENN75988.1 hypothetical protein YQE_07520, partial [Dendroctonus ponderosae] >ERL90652.1 hypothetical protein D910_07999 [Dendroctonus ponderosae]	466	5e-171	1569	90.1	91.8
TRINITY_DN27270_c1_g1	XP_019764606.1	PREDICTED: phosphatidylglycerophosphatase and protein-tyrosine phosphatase 1 [Dendroctonus ponderosae] >XP_019764607.1 PREDICTED: phosphatidylglycerophosphatase and protein-tyrosine phosphatase 1 [Dendroctonus ponderosae] >XP_019764608.1 PREDICTED: phosphatidylglycerophosphatase and protein-tyrosine phosphatase 1 [Dendroctonus ponderosae] >AEE63223.1 unknown [Dendroctonus ponderosae]	192	2.2e-100	959	95.3	97.9
TRINITY_DN20577_c0_g6	ERL90362.1	hypothetical protein D910_07711 [Dendroctonus ponderosae]	303	1.3e-145	1347	83.5	89.4
TRINITY_DN21830_c0_g7	XP_019756490.1	PREDICTED: adenylate kinase 9 [Dendroctonus ponderosae]	67	5.6e-26	308	85.1	92.5
TRINITY_DN27610_c1_g2	XP_018577377.1	uncharacterized protein LOC108915741 [Anoplophora glabripennis]	234	1.3e-16	232	26.5	49.6
TRINITY_DN26735_c0_g3	ENN78119.1	hypothetical protein YQE_05273, partial [Dendroctonus ponderosae]	141	2e-33	378	60.3	63.1
TRINITY_DN32808_c0_g1	XP_022798481.1	ubiquitin-conjugating enzyme E2-17 kDa isoform X2 [Stylophora pistillata]	112	2.8e-54	554	87.5	94.6
TRINITY_DN24664_c0_g2	XP_019771944.1	PREDICTED: uncharacterized protein LOC109545603 [Dendroctonus ponderosae] >XP_019771945.1 PREDICTED: uncharacterized protein LOC109545603 [Dendroctonus ponderosae] >ENN70417.1 hypothetical protein YQE_12922, partial [Dendroctonus ponderosae] >ERL88357.1 hypothetical protein D910_05744 [Dendroctonus ponderosae]	54	7.6e-23	284	100	100
TRINITY_DN18302_c0_g1	XP_027377031.1	40S ribosomal protein S17 [Bos indicus x Bos taurus]	85	8.6e-40	428	100	100
TRINITY_DN23614_c0_g1	XP_019763699.1	PREDICTED: PAX-interacting protein 1-like isoform X2 [Dendroctonus ponderosae]	814	0	3526	91.3	92.9
TRINITY_DN25400_c3_g3	ERL94958.1	hypothetical protein D910_12230 [Dendroctonus ponderosae]	89	1.1e-18	247	61.8	66.3
TRINITY_DN25883_c0_g1	XP_019767062.1	PREDICTED: bromodomain adjacent to zinc finger domain protein 1A isoform X2 [Dendroctonus ponderosae]	1223	0	5301	85.2	90.5
TRINITY_DN18881_c0_g1	ADG46776.1	NADH dehydrogenase subunit 1 (mitochondrion) [Homo sapiens]	296	1.7e-127	1189	91.2	94.3
TRINITY_DN23217_c0_g6	ERL93841.1	hypothetical protein D910_11127, partial [Dendroctonus ponderosae]	445	5.1e-232	2092	85.8	89.7
TRINITY_DN16870_c0_g2	XP_019772126.1	PREDICTED: neither inactivation nor afterpotential protein C [Dendroctonus ponderosae]	320	9.7e-153	1407	86.3	91.2
TRINITY_DN27740_c7_g1	XP_973868.1	PREDICTED: probable RNA-directed DNA polymerase from transposon X-element [Tribolium castaneum] >EFA13629.1 putative RNA-directed DNA polymerase from transposon X-element-like Protein [Tribolium castaneum]	733	7.4e-72	714	31.5	46.8
TRINITY_DN22943_c0_g3	XP_019759063.1	PREDICTED: ankyrin repeat domain-containing protein 13C [Dendroctonus ponderosae] >AEE62178.1 unknown [Dendroctonus ponderosae] >ENN77624.1 hypothetical protein YQE_05918, partial [Dendroctonus ponderosae] >ERL90250.1 hypothetical protein D910_07602 [Dendroctonus ponderosae]	399	1.7e-228	2066	99.2	99.2
TRINITY_DN19748_c0_g2	XP_019765487.1	PREDICTED: protein tipE [Dendroctonus ponderosae]	215	2.8e-122	1147	96.7	100
TRINITY_DN27736_c5_g1	KXZ75771.1	hypothetical protein TcasGA2_TC031700 [Tribolium castaneum]	788	8.1e-98	937	30.3	50.1
TRINITY_DN36223_c0_g1	XP_011567803.1	PREDICTED: K(+) efflux antiporter 2, chloroplastic-like [Plutella xylostella]	77	3.7e-21	267	72.7	89.6
TRINITY_DN18982_c0_g2	AEE63164.1	unknown [Dendroctonus ponderosae]	230	4e-124	1160	94.8	95.2
TRINITY_DN24945_c0_g1	XP_019764822.1	PREDICTED: putative inorganic phosphate cotransporter [Dendroctonus ponderosae] >ENN74416.1 hypothetical protein YQE_09001, partial [Dendroctonus ponderosae]	346	4.7e-190	1731	97.1	98.6
TRINITY_DN23220_c0_g1	XP_019767204.1	PREDICTED: glutaredoxin-related protein 5, mitochondrial isoform X2 [Dendroctonus ponderosae] >ENN73028.1 hypothetical protein YQE_10363, partial [Dendroctonus ponderosae] >ERL88721.1 hypothetical protein D910_06103 [Dendroctonus ponderosae]	142	7.2e-71	701	95.1	97.9
TRINITY_DN8605_c0_g2	BAD96324.1	ribosomal protein L5 variant, partial [Homo sapiens]	150	6.1e-81	785	100	100
TRINITY_DN27349_c1_g4	ERL93526.1	hypothetical protein D910_10815 [Dendroctonus ponderosae]	108	1.2e-39	428	75	87
TRINITY_DN28730_c0_g1	XP_005954850.1	PREDICTED: 2-isopropylmalate synthase-like, partial [Pantholops hodgsonii]	81	4e-39	422	98.8	98.8
TRINITY_DN20587_c0_g3	XP_019757006.1	PREDICTED: uncharacterized protein LOC109535533 [Dendroctonus ponderosae]	34	4.4e-11	181	94.1	97.1
TRINITY_DN26121_c2_g7	ERL95856.1	hypothetical protein D910_00469 [Dendroctonus ponderosae]	72	8.5e-08	152	52.8	63.9
TRINITY_DN932_c0_g1	AKK25153.1	odorant receptor 5 [Dendroctonus ponderosae]	47	1.3e-16	229	100	100
TRINITY_DN15177_c0_g1	ENN74681.1	hypothetical protein YQE_08798, partial [Dendroctonus ponderosae]	109	3.4e-40	433	85.3	85.3
TRINITY_DN18300_c0_g1	XP_019764278.1	PREDICTED: jmjC domain-containing protein 7 [Dendroctonus ponderosae] >ENN74803.1 hypothetical protein YQE_08576, partial [Dendroctonus ponderosae] >ERL91703.1 hypothetical protein D910_09030 [Dendroctonus ponderosae]	319	1.2e-180	1648	93.7	95.6
TRINITY_DN6294_c0_g1	XP_018028473.1	PREDICTED: glutathione peroxidase-like [Hyalella azteca]	144	3.5e-41	443	54.9	74.3
TRINITY_DN25383_c0_g2	XP_019754602.1	PREDICTED: NF-kappa-B inhibitor-interacting Ras-like protein isoform X1 [Dendroctonus ponderosae] >AEE62749.1 unknown [Dendroctonus ponderosae] >ENN80443.1 hypothetical protein YQE_03135, partial [Dendroctonus ponderosae] >ERL90028.1 hypothetical protein D910_07386 [Dendroctonus ponderosae]	142	1.3e-62	631	88	93
TRINITY_DN24586_c0_g3	XP_019762414.1	PREDICTED: beta-galactosidase-1-like protein 2 [Dendroctonus ponderosae]	501	1e-284	2547	96.2	99
TRINITY_DN10213_c0_g1	XP_019755114.1	PREDICTED: uncharacterized protein LOC109534013 [Dendroctonus ponderosae]	149	2.1e-73	720	96	99.3
TRINITY_DN32852_c0_g1	ENN81122.1	hypothetical protein YQE_02490, partial [Dendroctonus ponderosae] >ERL85237.1 hypothetical protein D910_02658 [Dendroctonus ponderosae]	123	2e-66	659	100	100
TRINITY_DN19704_c0_g1	XP_019756011.1	PREDICTED: uncharacterized protein LOC109534701 isoform X3 [Dendroctonus ponderosae]	44	1.1e-14	217	90.9	93.2
TRINITY_DN22668_c0_g1	AEE63102.1	unknown [Dendroctonus ponderosae]	404	1.5e-223	2020	99.3	99.8
TRINITY_DN26795_c0_g2	RLQ64823.1	RPL13A [Cricetulus griseus]	96	5.7e-48	499	100	100
TRINITY_DN20891_c2_g5	XP_027289600.1	uncharacterized protein LOC113837993 [Cricetulus griseus]	208	1.3e-25	310	46.2	52.9
[truncated: 15,807 more rows]
