# Supplementary material for: Expression analysis of genes related to cold tolerance in Dendroctonus valens
Source: PeerJ. 2021 Mar 9;9:e10864. doi: 10.7717/peerj.10864 (PMC7953874; doi:10.7717/peerj.10864)
Supplement: Supplemental Information 7 [file peerj-09-10864-s007.xlsx]

## Sheet: Larva
Larva data					average value	△Cq	2﹣△Cq		2﹣△△Cq						average value	△Cq	2﹣△Cq		2﹣△△Cq
TUB	January	22.21	22.15	22.31	22.2233					TUB	January	20.37	20.22	20.3	20.2967
		21.72	21.91	21.68	21.77							21.5	21.55	21.51	21.52
		21.54	21.5	21.49	21.51							22.67	22.67	22.31	22.55
	May	20.92	20.89	21.03	20.9467						May	21.83	21.44	21.44	21.57
		20.09	20.06	20.12	20.09							23	22.54	22.83	22.79
		22.08	21.9	22	21.9933							22.45	22.49	22.38	22.44
TRINITY_DN18757_c0_g2	January	22.54	22.53	22.57	22.5467	0.323333	0.799221	down	0.520216	TRINITY_DN18927_c0_g1	January	29.11	28.56	28.82	28.83	8.53333	0.00269905	down	0.00371531
		22.5	22.57	22.38	22.4833	0.713333	0.609909		0.396993			25.31	25.99	25.63	25.6433	4.12333	0.057379		0.0789838
		22.3	22.18	22.17	22.2167	0.706667	0.612734		0.398831			29.86	30.14	30.03	30.01	7.46	0.00567958		0.0078181
	May	20.24	20.2	20.29	20.2433	-0.703333	1.62826	1.53632	1.05984		May	21.76	21.64	21.44	21.6133	0.0433333	0.97041	0.726466	1.3358
		20.04	19.91	19.52	19.8233	-0.266667	1.20303		0.783054			24.26	23.8	22.6	23.5533	0.763333	0.589134		0.810958
		21.11	21.18	21.2	21.1633	-0.83	1.77769		1.1571			23.16	23.13	23.1	23.13	0.69	0.619854		0.853246
TRINITY_DN26187_c0_g1	January	26.64	26.63	26.6	26.6233	4.4	0.0473661	down	2.2956	TRINITY_DN26090_c0_g1	January	27.88	28.07	28.04	27.9967	7.7	0.00480916	down	0.0938928
		27.58	27.77	27.66	27.67	5.9	0.0167465		0.811615			25.18	25.24	25.23	25.2167	3.69667	0.0771245		1.50576
		27.52	27.58	27.59	27.5633	6.05333	0.0150579		0.729781			28.32	28.1	28.5	28.3067	5.75667	0.0184957		0.361106
	May	29.37	29.51	29.19	29.3567	8.41	0.00293994	0.0206335			May	26.51	26.66	27.07	26.7467	5.17667	0.0276483	0.0512196	0.539798
		26.39	26.66	26.6	26.55	6.46	0.0113592		0.550521			27.2	26.81	26.91	26.9733	4.18333	0.0550416		1.07462
		27.03	27.03	27.11	27.0567	5.06333	0.0299078		1.44948			26.29	26.23	26.25	26.2567	3.81667	0.070969		1.38558
TUB	January	20.33	21.2	21.19	20.9067					TUB	January	18.12	18.18	18.14	18.1467
		21.34	21.56	21.5	21.4667							18.5	18.54	18.85	18.63
		21.17	21.24	21.09	21.1667							18.61	18.77	18.76	18.7133
	May	20.66	20.82	20.76	20.7467						May	18.32	18.54	18.47	18.4433
		19.76	19.85	20.13	19.9133							17.97	17.97	17.95	17.9633
		21.36	21.4	21.4	21.3867							19.35	19.54	19.64	19.51
TRINITY_DN21780_c1_g1	January	24.1	24.2	24.25	24.1833	3.27667	0.103187	down	0.760976	TRINITY_DN22243_c0_g1	January	22.13	22.11	22.11	22.1167	3.97	0.0638133	down	0.648204
		24.57	24.7	24.85	24.7067	3.24	0.105843		0.780564			21.33	21.51	21.47	21.4367	2.80667	0.142925		1.45181
		24.08	24.05	24.11	24.08	2.91333	0.132739		0.978915			22.47	22.51	22.53	22.5033	3.79	0.072293		0.73434
	May	23.4	23.16	23.37	23.31	2.56333	0.169184	0.135598	1.24769		May	22.11	22.1	22.08	22.0967	3.65333	0.0794762	0.0984462	0.807306
		23.29	23.49	23.27	23.35	3.43667	0.092355		0.681092			20.78	21.03	20.75	20.8533	2.89	0.134904		1.37033
		24.22	24.19	24.1	24.17	2.78333	0.145256		1.07122			23.2	23.1	23.11	23.1367	3.62667	0.0809589		0.822367
TRINITY_DN22610_c0_g2	January	22.36	22.42	22.35	22.3767	1.47	0.360982	down	0.443527	TUB	January	18.82	19.08	19.04	18.98
		23.05	23.06	23.18	23.0967	1.63	0.323088		0.396968			19.66	19.95	19.94	19.85
		22.91	22.88	23.12	22.97	1.80333	0.286512		0.352028			18.64	19.32	20.04	19.3333
	May	21.02	20.92	21.07	21.0033	0.256667	0.83702	0.813889	1.02842		May	20.41	20.41	20.35	20.39
		20.63	20.7	20.94	20.7567	0.843333	0.557354		0.684804			19.56	19.6	19.63	19.5967
		21.28	21.3	21.38	21.32	-0.0666667	1.04729		1.28678			22.76	22.71	22.67	22.7133
TUB	January	20.2	20.05	20	20.0833					TRINITY_DN20229_c0_g1	January	18.06	18.02	18.13	18.07	-0.91	1.87905	down	0.0161951
		20.65	20.85	21	20.8333				411.502			13.77	13.92	13.86	13.85	-6	64		0.551604
		22.09	22.14	22.01	22.08							16.12	16.15	16.37	16.2133	-3.12	8.69388		0.0749309
	May	20.91	20.83	20.61	20.7833						May	13.01	13.22	13.12	13.1167	-7.27333	154.7	116.025	1.33333
		20.52	20.35	20.52	20.4633							11.57	11.56	11.33	11.4867	-8.11	276.282
		21.81	21.9	21.9	21.87							16.43	16.38	16.51	16.44	-6.27333	77.3502		0.666667
TRINITY_DN27537_c0_g1	January	19.42	19.31	19.2	19.31	-0.773333	1.70921	up	139.864	TRINITY_DN22439_c0_g5	January	19.6	19.71	19.67	19.66	0.68	0.624165	down	0.0914763
		17.96	18.05	18.06	18.0233	-2.81	7.01285		573.856			19.49	19.55	19.61	19.55	-0.3	1.23114		0.180434
		19.26	19.32	19.65	19.41	-2.67	6.36429		520.786			20.02	19.91	20.41	20.1133	0.78	0.582367		0.0853504
	May	27.7	27.31	27.16	27.39	6.60667	0.0102611	0.0122206	0.839661		May	17.47	17.68	17.48	17.5433	-2.84667	7.19336	6.82325	1.05424
		27.38	27.25	28.6	27.7433	7.28	0.0064343					18.67	18.65	18.93	18.75	-0.846667	1.79834
		28.6	27.18	28.25	28.01	6.14	0.01418		1.16034			20.02	19.96	20.09	20.0233	-2.69	6.45313		0.945757
TUB	January	20.64	20.42	20.26	20.44					TUB	January	20.78	20.69	20.59	20.6867
		21.01	21.15	21.42	21.1933							21.74	21.69	22.03	21.82
		21.28	21.41	21.24	21.31							21.8	21.99	21.78	21.8567
	May	21.96	21.69	21.39	21.68						May	21.41	21.39	21.18	21.3267
		20.87	20.68	20.85	20.8							20.34	20.34	20.63	20.4367
		22.71	22.55	22.59	22.6167							22.71	22.55	22.59	22.6167
TRINITY_DN27207_c0_g1	January	23.38	23.17	23.07	23.2067	2.76667	0.146943	up	3.63035	TRINITY_DN19691_c0_g1	January	22.74	22.59	22.69	22.6733	1.98667	0.252321	down	0.17681
		22.32	22.29	22.35	22.32	1.12667	0.457973		11.3145			22.54	22.45	22.42	22.47	0.65	0.63728		0.446565
		22.3	22.33	22.46	22.3633	1.05333	0.481854		11.9045			22.67	22.94	23.01	22.8733	1.01667	0.494257		0.346344
	May	26.69	26.59	26.7	26.66	4.98	0.0316862	0.0404764	0.782832		May	20.85	20.64	20.55	20.68	-0.646667	1.56555	1.42707	1.09703
		25.35	25.45	25.48	25.4267	4.62667	0.0404794		1.00007			20.14	20.06	20.21	20.1367	-0.3	1.23114		0.862707
		27.07	26.94	26.87	26.96	4.34333	0.0492636		1.21709			22	22.02	22.12	22.0467	-0.57	1.48452		1.04026
TRINITY_DN25425_c0_g4	January	23.05	22.43	22.64	22.7067	2.26667	0.207809	up	3.66258
		22.61	22.49	22.48	22.5267	1.33333	0.39685		6.99437
		22.38	22.39	22.38	22.3833	1.07333	0.47522		8.37561
	May	25.52	25.59	25.76	25.6233	3.94333	0.0650037		1.14567
		25.22	25.15	25.13	25.1667	4.36667	0.0484733	0.0567385	0.854328
		32.86	32.35	32.85	32.6867	10.07	0.000930311
TUB	January	21.52	21.19	21.16	21.29
		21.28	21.31	21.1	21.23
		22.29	23.91	22.15	22.7833
	May	21.45	21.37	21.15	21.3233
		20.41	20.48	20.55	20.48
		26.64	26.79	26.33	26.5867
TRINITY_DN22377_c1_g1	January	26.46	27.11	26.5	26.69	5.4	0.0236831	down	0.0573553
		25.06	25.18	25	25.08	3.85	0.0693481		0.167946
		26.55	26.49	26.57	26.5367	3.75333	0.0741539		0.179585
	May	21.99	22.01	22.14	22.0467	0.723333	0.605696	0.412918	1.46687
		21.46	21.45	21.37	21.4267	0.946667	0.51883		1.25649
		29.85	29.44	29.86	29.7167	3.13	0.114229		0.276638
	Descriptive statistics
		N statistics	Range statistics	Minimum statistics	Maximum Statistics	Average statistics	Standard error	standard deviation	variance
TRINITY_DN18757_c0_g2	VAR00001	3	0.12	0.4	0.52	0.4387	0.04077	0.07062	0.005
	VAR00002	3	0.37	0.78	1.16	1	0.11205	0.19407	0.038
TRINITY_DN26187_c0_g1	VAR00003	2	0.08	0.73	0.81	0.7707	0.04092	0.05787	0.003
	VAR00004	2	0.9	0.55	1.45	1	0.44948	0.63566	0.404
TRINITY_DN21780_c1_g1	VAR00005	3	0.22	0.76	0.98	0.8402	0.06961	0.12057	0.015
	VAR00006	3	0.57	0.68	1.25	1	0.16739	0.28993	0.084
TRINITY_DN22610_c0_g2	VAR00007	3	0.09	0.35	0.44	0.3975	0.02642	0.04575	0.002
	VAR00008	3	0.6	0.68	1.29	1	0.17435	0.30199	0.091
TRINITY_DN27537_c0_g1	VAR00009	2	53.07	520.79	573.86	547.321	26.5354	37.5267	1408.25
	VAR00010	2	0.32	0.84	1.16	1	0.16034	0.22675	0.051
TRINITY_DN27207_c0_g1	VAR00001	2	0.59	11.31	11.9	11.6095	0.295	0.41719	0.174
	VAR00002	3	0.43	0.78	1.22	1	0.12536	0.21713	0.047
TRINITY_DN25425_c0_g4	VAR00003	3	4.71	3.66	8.38	6.3442	1.39883	2.42285	5.87
	VAR00004	2	0.29	0.85	1.15	1	0.14567	0.20601	0.042
TRINITY_DN18927_c0_g1	VAR00005	3	0.08	0	0.08	0.0302	0.02443	0.04232	0.002
	VAR00006	3	0.52	0.81	1.34	1	0.16834	0.29158	0.085
TRINITY_DN26090_c0_g1	VAR00007	3	1.41	0.09	1.51	0.6536	0.43301	0.75	0.563
	VAR00008	3	0.85	0.54	1.39	1	0.24699	0.4278	0.183
TRINITY_DN22243_c0_g1	VAR00009	3	0.8	0.65	1.45	0.9448	0.25473	0.4412	0.195
	VAR00010	3	0.56	0.81	1.37	1	0.18521	0.3208	0.103
TRINITY_DN20229_c0_g1	VAR00011	3	0.54	0.02	0.55	0.2142	0.16953	0.29364	0.086
	VAR00012	2	0.67	0.67	1.33	1	0.33333	0.4714	0.222
TRINITY_DN22439_c0_g5	VAR00013	3	0.1	0.09	0.18	0.1191	0.03072	0.05322	0.003
	VAR00014	2	0.11	0.95	1.05	1	0.05424	0.07671	0.006
TRINITY_DN19691_c0_g1	VAR00015	3	0.27	0.18	0.45	0.3232	0.07872	0.13635	0.019
	VAR00016	3	0.23	0.86	1.1	1	0.07058	0.12224	0.015
TRINITY_DN22377_c1_g1	VAR00001	3	0.12	0.06	0.18	0.135	0.03895	0.06746	0.005
	VAR00002	3	1.19	0.28	1.47	1	0.36674	0.63522	0.404

## Sheet: Adult
Adult data					average value	△Cq	2﹣△Cq		2﹣△△Cq						average value	△Cq	2﹣△Cq		2﹣△△Cq
PRS	January	22.57	22.76	22.55	22.6267					PRS	January	21.97	22.03	21.89	21.9633
		22.37	22.61	22.44	22.4733							21.66	21.86	21.67	21.73
		25.1	25.12	25.18	25.1333							24.33	24.41	24.28	24.34
	May	23.09	23.15	23.18	23.14						May	22.38	22.36	22.41	22.3833
		21.1	21.21	21.1	21.1367							20.46	20.41	20.39	20.42
		22.78	22.69	22.68	22.7167							22.13	22.04	22.12	22.0967
TRINITY_DN22243_c0_g1	January	23.44	23.67	23.39	23.5	0.873333	0.545884	down	0.242808	TRINITY_DN26187_c0_g1	January	24.97	25.09	24.96	25.0067	3.04333	0.121301	down	0.0874057
		21.69	21.74	21.7	21.71	-0.763333	1.69741		0.755003			23.74	23.74	23.78	23.7533	2.02333	0.245989		0.177252
		24.09	24.09	24.35	24.1767	-0.956667	1.94082		0.863272			23.76	23.64	23.86	23.7533	-0.586667	1.50177		1.08213
	May	21.35	21.38	21.31	21.3467	-1.79333	3.46615	2.24821	1.54173		May	22.01	22.09	22.18	22.0933	-0.29	1.22264	1.3878	0.880994
		20.12	20.12	20.28	20.1733	-0.963333	1.94981		0.86727			20.06	20.05	20.14	20.0833	-0.336667	1.26284		0.909958
		22.34	22.28	22.3	22.3067	-0.41	1.32869		0.590996			21.37	21.31	21.37	21.35	-0.746667	1.67791		1.20905
TRINITY_DN18757_c0_g2	January	20.45	20.38	20.47	20.4333	-2.19333	4.57361	down	0.0809224	TRINITY_DN21780_c1_g1	January	25.98	25.62	25.62	25.74	3.77667	0.0729642	down	0.110555
		18.99	19.07	18.91	18.99	-3.48333	11.1838		0.197878			22.98	22.88	22.86	22.9067	1.17667	0.442372		0.670278
		20	20.1	19.86	19.9867	-5.14667	35.4243		0.626773			24.42	24.37	23.81	24.2	-0.14	1.10191		1.66959
	May	17.42	17.25	17.16	17.2767	-5.86333	58.2156	56.5185	1.03003		May	22.16	22.67	22.2	22.3433	-0.04	1.02811	0.659984	1.55779
		14.75	15.01	15.05	14.9367	-6.2	73.5167					21.15	22.68	21.4	21.7433	1.32333	0.399611		0.605485
		16.66	17.09	17.07	16.94	-5.77667	54.8214		0.969973			23.08	23.12	22.66	22.9533	0.856667	0.552227		0.836728
PRS	January	25.59	25.58	25.61	25.5933					PRS	January	21.48	21.46	21.45	21.4633
		25.34	25.46	28.29	26.3633							21.4	21.45	21.37	21.4067
		28.29	28.4	28.29	28.3267							23.69	23.58	23.73	23.6667
	May	25.83	25.75	25.55	25.71						May	22.61	22.78	22.58	22.6567
		23.39	23.73	23.42	23.5133							20.35	20.45	20.34	20.38
		25.92	25.59	25.5	25.67							21.9	21.65	21.82	21.79
TRINITY_DN22610_c0_g2	January	21.86	21.9	21.8	21.8533	-3.74	13.3614	down	0.0848849	TRINITY_DN27537_c0_g1	January	16.94	16.81	16.94	16.8967	-4.56667	23.6976	up	44.8426
		20.48	20.35	20.43	20.42	-5.94333	61.5349		0.390931			13.57	13.7	13.69	13.6533	-7.75333	215.767		408.294
		22.18	21.85	22.43	22.1533	-6.17333	72.1703		0.458497			16.15	16.15	16.12	16.14	-7.52667	184.396		348.931
	May	18.33	18.33	18.29	18.3167	-7.39333	168.118	157.406	1.06805		May	23.12	22.85	22.83	22.9333	0.276667	0.825496	0.528461	1.56208
		17.39	17.37	17.41	17.39	-6.12333	69.7119					21.69	21.32	21.29	21.4333	1.05333	0.481854		0.911805
		18.72	18.35	18.35	18.4733	-7.19667	146.694		0.931946			23.73	23.61	23.57	23.6367	1.84667	0.278034		0.52612
PRS	January	21.98	21.85	21.85	21.8933					PRS	January	22.82	22.83	22.67	22.7733
		21.68	21.64	21.65	21.6567							22.49	22.72	22.6	22.6033
		24.04	24.11	23.95	24.0333							25.05	25.17	25.34	25.1867
	May	23.03	22.88	22.89	22.9333						May	23.71	23.84	23.81	23.7867
		20.68	20.83	20.7	20.7367							21.33	21.37	21.35	21.35
		22.18	22.12	22.15	22.15							22.92	23.08	22.88	22.96
TRINITY_DN18927_c0_g1	January	25.11	24.85	24.92	24.96	3.06667	0.119355	down	0.00501477	TRINITY_DN26090_c0_g1	January	23.71	23.91	23.94	23.8533	1.08	0.473029	down	0.44946
		22.17	22.27	22.2	22.2133	0.556667	0.679871		0.0285651			23.17	23.22	23.14	23.1767	0.573333	0.672062		0.638577
		25.49	25.67	25.39	25.5167	1.48333	0.357661		0.0150273			23.42	23.37	23.34	23.3767	-1.81	3.50642		3.33172
	May	18.37	17.98	18.05	18.1333	-4.8	27.8576	23.8007	1.17045		May	23.36	23.21	23.42	23.33	-0.456667	1.37237	1.05244	1.30399
		17.51	17.48	17.41	17.4667	-3.27	9.64646					22.2	22.29	22.14	22.21	0.86	0.550953		0.523502
		17.8	17.94	17.8	17.8467	-4.30333	19.7439		0.829549			22.71	22.58	22.68	22.6567	-0.303333	1.23399		1.17251
PRS	January	21.62	21.49	21.5	21.5367					TRINITY_DN20229_c0_g1	January	22.47	22.31	24.31	23.03	0.256667	0.83702	up	1.15892
		23.78	23.68	24.01	23.8233							18.45	18.32	18.45	18.4067	-4.19667	18.3368		25.3887
		24.37	24.22	23.89	24.16							21.39	21.04	21.45	21.2933	-3.89333	14.8597		20.5744
	May	22.36	22.39	22.54	22.43						May	24.27	24.25	24.13	24.2167	0.43	0.742262	0.722242	1.02772
		20.57	20.53	20.64	20.58							25.1	24.7	25.01	24.9367	3.58667	0.083235
		22.04	22.04	21.97	22.0167							23.58	23.38	23.45	23.47	0.51	0.702222		0.972281
TRINITY_DN27207_c0_g1	January	26.59	26.25	26.25	26.3633	4.82667	0.0352394	down	0.0357827	TRINITY_DN22439_c0_g5	January	17.07	16.97	17.37	17.1367	-5.63667	49.7514	up	32.83
		24.37	24.57	24.51	24.4833	0.66	0.632878		0.642635			15.79	15.74	15.73	15.7533	-6.85	115.36		76.1237
		23.07	22.83	23.15	23.0167	-1.14333	2.20891		2.24296			17.45	17.46	18.19	17.7	-7.48667	179.354		118.352
	May	22.31	22.3	22.57	22.3933	-0.0366667	1.02574	0.984817	1.04156		May	22.53	22.34	22.52	22.4633	-1.32333	2.50244	1.51543	1.65131
		20.97	21	20.92	20.9633	0.383333	0.766664		0.778484			21.77	21.72	22.82	22.1033	0.753333	0.593231		0.391461
		21.86	21.78	21.76	21.8	-0.216667	1.16205		1.17996			22.35	22.52	22.4	22.4233	-0.536667	1.45062		0.957232
TRINITY_DN25425_c0_g4	January	22.35	22.26	22.34	22.3167	0.78	0.582367	down	0.263866	PRS	January	21.84	22.01	21.82	21.89
		23.46	23.48	23.53	23.49	-0.333333	1.25992		0.570862			24.03	24.18	24.4	24.2033
		22.75	23.22	23.42	23.13	-1.03	2.04202		0.925227			24.33	24.15	24.54	24.34
	May	21.12	21.07	21.03	21.0733	-1.35667	2.56093	2.20705	1.16034		May	22.96	22.97	23.06	22.9967
		20.51	20.63	20.78	20.64	0.06	0.959264					21.24	21.19	21.35	21.26
		21.09	21.09	21.2	21.1267	-0.89	1.85318		0.839661			22.28	22.43	22.6	22.4367
TRINITY_DN19691_c0_g1	January	23.66	23.43	23.57	23.5533	2.01667	0.247129	down	0.0846925	TRINITY_DN22377_c1_g1	January	25.03	25.06	24.93	25.0067	3.11667	0.11529	down	0.183061
		24.58	24.48	24.64	24.5667	0.743333	0.597358		0.204718			27.33	27.42	27.52	27.4233	3.22	0.107321		0.170408
		24.43	24.45	24.41	24.43	0.27	0.82932		0.284213			28.81	26.39	28.8	28	3.66	0.0791098		0.125613
	May	20.09	19.89	20.11	20.03	-2.4	5.27803	2.91795			May	21.16	21.17	21.16	21.1633	-1.83333	3.56359	0.629788
		19.19	19.23	19.12	19.18	-1.4	2.63902		0.904407			21.71	21.84	21.76	21.77	0.51	0.702222		1.11501
		20.25	20.35	20.42	20.34	-1.67667	3.19688		1.09559			23.85	22.34	23.65	23.28	0.843333	0.557354		0.884987
	Descriptive statistics
		N statistics	Range statistics	Minimum statistics	Maximum Statistics	Average statistics	Standard error	standard deviation	variance
TRINITY_DN22243_c0_g1	VAR00001	3	0.62	0.24	0.86	0.6204	0.19135	0.33142	0.11
	VAR00002	3	0.95	0.59	1.54	1	0.28236	0.48907	0.239
TRINITY_DN18757_c0_g2	VAR00003	3	0.55	0.08	0.63	0.3019	0.16593	0.2874	0.083
	VAR00004	2	0.06	0.97	1.03	1	0.03003	0.04247	0.002
TRINITY_DN26187_c0_g1	VAR00005	3	0.99	0.09	1.08	0.4489	0.31766	0.5502	0.303
	VAR00006	3	0.33	0.88	1.21	1	0.10486	0.18162	0.033
TRINITY_DN21780_c1_g1	VAR00007	3	1.56	0.11	1.67	0.8168	0.45598	0.78978	0.624
	VAR00008	3	0.95	0.61	1.56	1	0.28677	0.4967	0.247
TRINITY_DN22610_c0_g2	VAR00009	3	0.37	0.08	0.46	0.3114	0.11494	0.19909	0.04
	VAR00010	2	0.14	0.93	1.07	1	0.06805	0.09624	0.009
TRINITY_DN27207_c0_g1	VAR00013	2	0.63	0	0.63	0.3172	0.31259	0.44207	0.195
	VAR00014	3	1.63	0.21	1.84	1	0.4704	0.81475	0.664
TRINITY_DN27537_c0_g1	VAR00015	2	59.36	348.93	408.29	378.612	29.6815	41.976	1761.98
	VAR00016	3	1.04	0.53	1.56	1	0.30229	0.52358	0.274
TRINITY_DN18927_c0_g1	VAR00017	3	0.02	0.01	0.03	0.0162	0.00682	0.01182	0
	VAR00018	2	0.34	0.83	1.17	1	0.17045	0.24105	0.058
TRINITY_DN25425_c0_g4	VAR00003	3	0.66	0.26	0.93	0.5867	0.19108	0.33096	0.11
	VAR00004	2	0.32	0.84	1.16	1	0.16034	0.22675	0.051
TRINITY_DN19691_c0_g1	VAR00005	3	0.2	0.08	0.28	0.1912	0.05799	0.10044	0.01
	VAR00006	2	0.19	0.9	1.1	1	0.09559	0.13519	0.018
TRINITY_DN26090_c0_g1	VAR00019	2	0.19	0.45	0.64	0.544	0.09456	0.13373	0.018
	VAR00020	3	0.78	0.52	1.3	1	0.24125	0.41786	0.175
TRINITY_DN20229_c0_g1	VAR00021	2	4.81	20.57	25.39	22.9815	2.40713	3.40419	11.589
	VAR00022	2	0.06	0.97	1.03	1	0.02772	0.0392	0.002
TRINITY_DN22439_c0_g5	VAR00023	2	42.23	76.12	118.35	97.2379	21.1142	29.8599	891.616
	VAR00024	3	1.26	0.39	1.65	1	0.36431	0.63101	0.398
TRINITY_DN22377_c1_g1	VAR00003	3	0.06	0.13	0.18	0.1597	0.01743	0.03019	0.001
	VAR00004	2	0.23	0.88	1.12	1	0.11501	0.16265	0.026
