# Supplementary material for: Expression analysis of genes related to cold tolerance in Dendroctonus valens
Source: PeerJ. 2021 Mar 9;9:e10864. doi: 10.7717/peerj.10864 (PMC7953874; doi:10.7717/peerj.10864)
Supplement: Table S3 [file peerj-09-10864-s005.xlsx]

## Sheet: Annotations of the common DEGs
Gene_id	Log2FC(CA/NA)	A-Pvalue	A-Padjust	A-Regulate	Log2FC(CL/NL)	L-Pvalue	L-Padjust	L-Regulate	NR description	B2_3	GO_id	GO_term	KO_id	KO_name	Pathway_id	Pathway_definition	COG_id	COG_Functional Categories	Swiss-Prot_hit-name	Swiss-Prot_description	Pfam_id	Domain	Domain description
TRINITY_DN11436_c0_g1	-3.30332	1.21864e-06	1.76607e-05	down	-7.66596	2.51768e-10	7.14153e-09	down	unknown [Dendroctonus ponderosae]	29.75	GO:0005975;GO:0004553	BP:carbohydrate metabolic process;MF:hydrolase activity, hydrolyzing O-glycosyl compounds;	K01229	LCT	map04973;map00052	Carbohydrate digestion and absorption;Galactose metabolism	COG2723	G:Carbohydrate transport and metabolism	sp|Q95X01|MYRO1_BREBR;	Myrosinase 1 OS=Brevicoryne brassicae OX=69196 PE=1 SV=1;	PF00232	Glyco_hydro_1	Glycosyl hydrolase family 1
TRINITY_DN12641_c0_g1	-2.79736	6.33783e-05	0.000517774	down	-3.68321	2.74156e-05	0.000219216	down	hypothetical protein YQE_10657, partial [Dendroctonus ponderosae]	14.58	GO:0042302	MF:structural constituent of cuticle;	------	------	------	------	ENOG4111PJ1;ENOG410YR66	S:Function unknown;	sp|O02387|CU17_BOMMO;	Larval cuticle protein LCP-17 OS=Bombyx mori OX=7091 GN=LCP17 PE=2 SV=1;	PF00379	Chitin_bind_4	Insect cuticle protein
TRINITY_DN15652_c0_g1	1.55867	0.00153426	0.00739988	up	3.28422	9.49015e-16	7.79689e-14	up	unknown [Dendroctonus ponderosae]	8.61	GO:0051123;GO:0043966;GO:0006352;GO:0000124;GO:0005669;GO:0046695;GO:0017025;GO:0003677;GO:0046982;GO:0003743	BP:RNA polymerase II transcriptional preinitiation complex assembly;BP:histone H3 acetylation;BP:DNA-templated transcription, initiation;CC:SAGA complex;CC:transcription factor TFIID complex;CC:SLI;MF:TBP-class protein binding;MF:DNA binding;MF:protein heterodimerization activity;MF:translation initiation factor activity;	K03126	TAF12	map03022	Basal transcription factors	COG5624	K:Transcription	sp|P49905|TAF12_DROME;	Transcription initiation factor TFIID subunit 12 OS=Drosophila melanogaster OX=7227 GN=Taf12 PE=1 SV=1;	PF03847	TFIID_20kDa	Transcription initiation factor TFIID subunit A
TRINITY_DN16049_c0_g1	-1.41527	0.00017786	0.0012401	down	-1.77443	4.37456e-10	1.16514e-08	down	PREDICTED: nucleolysin TIAR [Dendroctonus ponderosae] >AEE63208.1 unknown [Dendroctonus ponderosae] >ENN71538.1 hypothetical protein YQE_11831, partial [Dendroctonus ponderosae] >ERL89908.1 hypothetical protein D910_07267 [Dendroctonus ponderosae]	41.07	GO:0005634;GO:1990904;GO:0003723	CC:nucleus;CC:ribonucleoprotein complex;MF:RNA binding;	K13201	TIA1, TIAL1	------	------	ENOG410XQ8U	S:Function unknown	sp|Q01085|TIAR_HUMAN;	Nucleolysin TIAR OS=Homo sapiens OX=9606 GN=TIAL1 PE=1 SV=1;	PF00076;PF16842;PF15023	RRM_1;RRM_occluded;DUF4523	RNA recognition motif.;Occluded RNA-recognition motif;Protein of unknown function
TRINITY_DN16149_c0_g1	1.71471	6.35391e-05	0.000518453	up	2.1886	0.000817522	0.00402016	up	PREDICTED: NEDD8 [Dendroctonus ponderosae]	48.76	------	------	K12158	NEDD8	------	------	COG5272	O:Posttranslational modification, protein turnover, chaperones	sp|Q9VJ33|NEDD8_DROME;	NEDD8 OS=Drosophila melanogaster OX=7227 GN=Nedd8 PE=1 SV=1;	PF00240;PF11976;PF14560;PF18396	ubiquitin;Rad60-SLD;Ubiquitin_2;TBK1_ULD	Ubiquitin family;Ubiquitin-2 like Rad60 SUMO-like;Ubiquitin-like domain;TANK binding kinase 1 ubiquitin-like domain
TRINITY_DN16348_c0_g1	-4.96037	3.69665e-14	3.35578e-12	down	-7.71579	6.24848e-15	4.48685e-13	down	hypothetical protein D910_10540 [Dendroctonus ponderosae]	9.86	GO:0006685;GO:0046513;GO:0005615;GO:0005764;GO:0016787;GO:0008081;GO:0061750;GO:0016798;GO:0004767;GO:0046872	BP:sphingomyelin catabolic process;BP:ceramide biosynthetic process;CC:extracellular space;CC:lysosome;MF:hydrolase activity;MF:phosphoric diester hydrolase activity;MF:acid sphingomyelin phosphodiesterase activity;MF:hydrolase activity, acting on glycosyl bonds;MF:sphingomyelin phosphodiesterase activity;MF:metal ion binding;	K12350	SMPD1, ASM	map00600;map04071;map04142	Sphingolipid metabolism;Sphingolipid signaling pathway;Lysosome	ENOG4111PD1;ENOG410YYPB;ENOG410XRQH	S:Function unknown;	sp|Q0VD19|ASM_BOVIN;	Sphingomyelin phosphodiesterase OS=Bos taurus OX=9913 GN=SMPD1 PE=2 SV=1;	PF00149	Metallophos	Calcineurin-like phosphoesterase
TRINITY_DN16531_c0_g1	2.36707	1.81709e-05	0.000180306	up	-1.3481	0.000157498	0.000987148	down	PREDICTED: uncharacterized protein LOC109538504 [Dendroctonus ponderosae] >ENN76346.1 hypothetical protein YQE_07123, partial [Dendroctonus ponderosae]	3.73	GO:0065004;GO:0042795;GO:0006383;GO:0042796;GO:0000127;GO:0019185;GO:0001006;GO:0001047;GO:0003681;GO:0000978	BP:protein-DNA complex assembly;BP:snRNA transcription from RNA polymerase II promoter;BP:transcription from RNA polymerase III promoter;BP:snRNA transcription from RNA polymerase III promoter;CC:transcription factor TFIIIC complex;CC:snRNA-activating protein complex;MF:RNA polymerase III type 3 promoter sequence-specific DNA binding;MF:core promoter binding;MF:bent DNA binding;MF:RNA polymerase …	K15203;K15210	GTF3C6;SNAPC3	------	------	ENOG411090A;ENOG410Y504	S:Function unknown;	------	------	PF10419	TFIIIC_sub6	TFIIIC subunit triple barrel domain
TRINITY_DN17031_c0_g1	-2.23911	0.00100747	0.0052444	down	2.91073	0.00134399	0.00612673	up		33.77	------	------	------	------	------	------	------	------	------	------	------	------	------
TRINITY_DN17119_c0_g1	4.44852	3.71787e-05	0.00033095	up	-7.40687	0.000128925	0.000826522	down	PREDICTED: mucin-19-like [Dendroctonus ponderosae] >AEE61938.1 unknown [Dendroctonus ponderosae] >ENN73848.1 hypothetical protein YQE_09540, partial [Dendroctonus ponderosae] >ERL94916.1 hypothetical protein D910_12188 [Dendroctonus ponderosae]	8.18	------	------	------	------	------	------	------	------	------	------	------	------	------
TRINITY_DN17159_c0_g1	-2.9634	9.14521e-16	1.12817e-13	down	-2.74402	7.83577e-11	2.51614e-09	down	PREDICTED: enhancer of split mbeta protein-like [Dendroctonus ponderosae] >ENN70558.1 hypothetical protein YQE_12733, partial [Dendroctonus ponderosae] >ERL84430.1 hypothetical protein D910_01862 [Dendroctonus ponderosae]	50.85	GO:0050767;GO:0009952;GO:0000122;GO:0030154;GO:0006355;GO:0005634;GO:0001227;GO:0000977;GO:0003677;GO:0046983	BP:regulation of neurogenesis;BP:anterior/posterior pattern specification;BP:negative regulation of transcription from RNA polymerase II promoter;BP:cell differentiation;BP:regulation of transcription, DNA-templated;CC:nucleus;MF:transcriptional repressor activity, RNA polymerase II transcription regulatory region sequence-specific binding;MF:RNA polymerase II regulatory region sequence-specific …	K09090	HESN	------	------	ENOG4111F0X	O:Posttranslational modification, protein turnover, chaperones	sp|Q01070|ESMC_DROME;	Enhancer of split mgamma protein OS=Drosophila melanogaster OX=7227 GN=;	PF00010;PF07527	HLH;Hairy_orange	Helix-loop-helix DNA-binding domain;Hairy Orange
TRINITY_DN17321_c0_g1	1.63306	0.000370839	0.00229014	up	2.11019	2.14615e-09	4.94863e-08	up	hypothetical protein YQE_02043, partial [Dendroctonus ponderosae]	22.36	GO:0044154;GO:0043972;GO:0043968;GO:0043983;GO:0043981;GO:0043982;GO:0016573;GO:0000123;GO:0005730;GO:0070776;GO:1990468;GO:0035267;GO:1990467	BP:histone H3-K14 acetylation;BP:histone H3-K23 acetylation;BP:histone H2A acetylation;BP:histone H4-K12 acetylation;BP:histone H4-K5 acetylation;BP:histone H4-K8 acetylation;BP:histone acetylation;CC:histone acetyltransferase complex;CC:nucleolus;CC:MOZ/MORF histone acetyltransferase complex;CC:NuA3b histone acetyltransferase complex;CC:NuA4 histone acetyltransferase complex;CC:NuA3a histone ace…	K11344	EAF6	------	------	ENOG4111IAX	K:Transcription	sp|Q52KD8|EAF6_XENLA;	Chromatin modification-related protein MEAF6 OS=Xenopus laevis OX=8355 GN=meaf6 PE=2 SV=1;	PF09340	NuA4	Histone acetyltransferase subunit NuA4
TRINITY_DN17355_c0_g1	3.27153	2.63477e-15	2.93409e-13	up	1.29087	0.000378305	0.00209533	up	hypothetical protein D910_08985 [Dendroctonus ponderosae]	7.17	GO:0043547;GO:0046907;GO:0006611;GO:0005737;GO:0005634;GO:0005623;GO:0005643;GO:0008536	BP:positive regulation of GTPase activity;BP:intracellular transport;BP:protein export from nucleus;CC:cytoplasm;CC:nucleus;CC:cell;CC:nuclear pore;MF:Ran GTPase binding;	K15304	RANBP3	map05166	HTLV-I infection	ENOG4111NCK	U:Intracellular trafficking, secretion, and vesicular transport	sp|Q9CT10|RANB3_MOUSE;	Ran-binding protein 3 OS=Mus musculus OX=10090 GN=Ranbp3 PE=1 SV=2;	PF00638	Ran_BP1	RanBP1 domain
TRINITY_DN17558_c0_g1	-2.69888	5.87172e-05	0.000485445	down	-3.29466	1.66438e-12	7.45863e-11	down	PREDICTED: uncharacterized protein LOC109538123 [Dendroctonus ponderosae] >ERL90549.1 hypothetical protein D910_07897 [Dendroctonus ponderosae]	10.48	------	------	------	------	------	------	------	------	------	------	------	------	------
TRINITY_DN17570_c0_g1	-4.96373	1.27589e-30	1.09671e-27	down	-9.28826	2.18359e-05	0.000178674	down	PREDICTED: tetranectin-like protein [Dendroctonus ponderosae] >ENN79472.1 hypothetical protein YQE_04116, partial [Dendroctonus ponderosae]	557.2	GO:0030246	MF:carbohydrate binding;	------	------	------	------	------	------	------	------	PF00059	Lectin_C	Lectin C-type domain
TRINITY_DN17581_c0_g1	-7.35066	1.13868e-07	2.26795e-06	down	-6.94746	2.10689e-06	2.33177e-05	down	PREDICTED: low-density lipoprotein receptor-related protein 2-like, partial [Dendroctonus ponderosae]	13.17	------	------	------	------	------	------	------	------	------	------	PF00057	Ldl_recept_a	Low-density lipoprotein receptor domain class A
TRINITY_DN17668_c0_g1	-1.56032	0.000145592	0.00104889	down	3.9437	2.49066e-06	2.69278e-05	up	hypothetical protein YQE_01777, partial [Dendroctonus ponderosae] >ERL94985.1 hypothetical protein D910_12257 [Dendroctonus ponderosae]	196.31	------	------	------	------	------	------	------	------	------	------	------	------	------
TRINITY_DN17730_c0_g1	2.39532	1.48633e-05	0.000151531	up	1.63985	0.000810877	0.0039923	up	PREDICTED: cleavage and polyadenylation specificity factor subunit 4 [Dendroctonus ponderosae] >XP_019754034.1 PREDICTED: cleavage and polyadenylation specificity factor subunit 4 [Dendroctonus ponderosae] >AEE61934.1 unknown [Dendroctonus ponderosae] >ENN80839.1 hypothetical protein YQE_02746, partial [Dendroctonus ponderosae] >ERL90524.1 hypothetical protein D910_07872 [Dendroctonus ponderosae]	5.34	GO:0098789;GO:0008270;GO:0003676	BP:pre-mRNA cleavage required for polyadenylation;MF:zinc ion binding;MF:nucleic acid binding;	K14404	CPSF4, YTH1	map05164;map03015	Influenza A;mRNA surveillance pathway	COG5084;COG1358	S:Function unknown;J:Translation, ribosomal structure and biogenesis	sp|Q9VPT8|CPSF4_DROME;	Cleavage and polyadenylation specificity factor subunit 4 OS=Drosophila melanogaster OX=7227 GN=Clp PE=1 SV=1;	PF00642;PF18345;PF16131;PF18044;PF15663;PF00098	zf-CCCH;zf_CCCH_4;Torus;zf-CCCH_4;zf-CCCH_3;zf-CCHC	Zinc finger C-x8-C-x5-C-x3-H type;Zinc finger domain;Torus domain;CCCH-type zinc finger;Zinc-finger containing family;Zinc knuckle
TRINITY_DN17797_c0_g1	-8.00898	5.53068e-07	8.84972e-06	down	-3.99842	0.000495255	0.00263505	down	PREDICTED: prostatic acid phosphatase-like [Dendroctonus ponderosae] >ENN80100.1 hypothetical protein YQE_03459, partial [Dendroctonus ponderosae]	81.15	GO:0003993	MF:acid phosphatase activity;	K19283	ACPP	------	------	ENOG410ZVBQ	S:Function unknown	sp|Q8CE08|PPAP_MOUSE;	Prostatic acid phosphatase OS=Mus musculus OX=10090 GN=Acpp PE=2 SV=1;	PF00328	His_Phos_2	Histidine phosphatase superfamily
TRINITY_DN17820_c0_g1	-5.02643	1.84713e-17	3.07922e-15	down	-6.65917	7.39939e-06	7.06584e-05	down	hypothetical protein D910_11706 [Dendroctonus ponderosae]	147.71	GO:0005975;GO:0003824;GO:0016810	BP:carbohydrate metabolic process;MF:catalytic activity;MF:hydrolase activity, acting on carbon-nitroge;	------	------	------	------	ENOG410ZWU3	S:Function unknown	------	------	------	------	------
TRINITY_DN17864_c0_g1	-2.43655	4.00099e-07	6.69819e-06	down	-2.43768	8.95145e-09	1.84065e-07	down	PREDICTED: A-kinase anchor protein 10, mitochondrial [Dendroctonus ponderosae]	8.74	GO:0008104;GO:0005739;GO:0005886;GO:0051018;GO:0016301	BP:protein localization;CC:mitochondrion;CC:plasma membrane;MF:protein kinase A binding;MF:kinase activity;	K16526	AKAP10	------	------	ENOG410YH1M	S:Function unknown	sp|O88845|AKA10_MOUSE;	A-kinase anchor protein 10, mitochondrial OS=Mus musculus OX=10090 GN=Akap10 PE=1 SV=3;	PF00615	RGS	Regulator of G protein signaling domain
TRINITY_DN17874_c0_g1	-4.49012	2.30214e-14	2.14653e-12	down	-6.80729	8.16059e-18	9.72818e-16	down	PREDICTED: brachyurin-like [Dendroctonus ponderosae]	56.19	GO:0004252	MF:serine-type endopeptidase activity;	------	------	------	------	COG5640	O:Posttranslational modification, protein turnover, chaperones	sp|O97398|CTR_PHACE;	Chymotrypsin OS=Phaedon cochleariae OX=80249 PE=2 SV=1;	PF00089	Trypsin	Trypsin
TRINITY_DN17894_c0_g1	1.51358	0.000577143	0.00331279	up	-2.0967	3.2916e-07	4.55159e-06	down	PREDICTED: 26S proteasome non-ATPase regulatory subunit 5 [Dendroctonus ponderosae] >ENN80807.1 hypothetical protein YQE_02778, partial [Dendroctonus ponderosae] >ERL87508.1 hypothetical protein D910_04900 [Dendroctonus ponderosae]	9.85	GO:0043248;GO:0000502;GO:0008540	BP:proteasome assembly;CC:proteasome complex;CC:proteasome regulatory particle, base subcomplex;	K06692	PSMD5	------	------	ENOG410XTFA	O:Posttranslational modification, protein turnover, chaperones	sp|Q8BJY1|PSMD5_MOUSE;	26S proteasome non-ATPase regulatory subunit 5 OS=Mus musculus OX=10090 GN=Psmd5 PE=1 SV=4;	PF10508	Proteasom_PSMB	Proteasome non-ATPase 26S subunit
TRINITY_DN17926_c0_g1	3.63218	0.00154844	0.00744996	up	6.55965	7.55831e-06	7.21004e-05	up	hypothetical protein YQE_02062, partial [Dendroctonus ponderosae]	0.15	GO:0003676	MF:nucleic acid binding;	------	------	------	------	------	------	------	------	------	------	------
TRINITY_DN17982_c0_g1	-2.59068	5.79676e-06	6.78203e-05	down	-4.63406	0.000106852	0.000702802	down	PREDICTED: uncharacterized protein LOC109544280 [Dendroctonus ponderosae] >ENN71477.1 hypothetical protein YQE_11894, partial [Dendroctonus ponderosae]	48.11	------	------	------	------	------	------	------	------	------	------	------	------	------
TRINITY_DN17988_c0_g1	3.42189	0.000456423	0.00272862	up	5.29484	0.00154585	0.00686673	up	PREDICTED: uncharacterized protein LOC109534881 [Dendroctonus ponderosae]	0.09	------	------	------	------	------	------	------	------	------	------	------	------	------
TRINITY_DN18079_c0_g1	-4.75884	1.13316e-22	3.99599e-20	down	-9.47121	0.000327177	0.00185208	down	PREDICTED: collectin-10-like [Dendroctonus ponderosae] >ENN79471.1 hypothetical protein YQE_04115, partial [Dendroctonus ponderosae]	382.74	GO:0016021;GO:0030246	CC:integral component of membrane;MF:carbohydrate binding;	------	------	------	------	ENOG410XPJ1	S:Function unknown	------	------	PF00059	Lectin_C	Lectin C-type domain
TRINITY_DN18126_c0_g1	-2.96956	0.00017285	0.00121055	down	-2.26691	0.000542358	0.00284857	down	unknown [Dendroctonus ponderosae]	15.54	GO:0006048;GO:0003977;GO:0070569	BP:UDP-N-acetylglucosamine biosynthetic process;MF:UDP-N-acetylglucosamine diphosphorylase activity;MF:uridylyltransferase activity;	K00972	UAP1	map00520	Amino sugar and nucleotide sugar metabolism	COG4284	G:Carbohydrate transport and metabolism	sp|Q91YN5|UAP1_MOUSE;	UDP-N-acetylhexosamine pyrophosphorylase OS=Mus musculus OX=10090 GN=Uap1 PE=1 SV=1;	PF01704	UDPGP	UTP--glucose-1-phosphate uridylyltransferase
TRINITY_DN18196_c0_g1	2.77922	6.21696e-05	0.000509395	up	2.43722	1.80662e-08	3.40754e-07	up	PREDICTED: uncharacterized protein LOC109540053 [Dendroctonus ponderosae] >XP_019763772.1 PREDICTED: uncharacterized protein LOC109540053 [Dendroctonus ponderosae] >XP_019763773.1 PREDICTED: uncharacterized protein LOC109540053 [Dendroctonus ponderosae] >XP_019763774.1 PREDICTED: uncharacterized protein LOC109540053 [Dendroctonus ponderosae] >ENN75035.1 hypothetical protein YQE_08350, partial [De…	2.38	------	------	------	------	------	------	ENOG410YRHH;ENOG4111AIH;ENOG410Z8A8;ENOG410Y7US	S:Function unknown;	------	------	PF10545	MADF_DNA_bdg	Alcohol dehydrogenase transcription factor Myb/SANT-like
TRINITY_DN18232_c0_g1	-2.72913	0.000199939	0.00136499	down	4.75966	0.000746901	0.00372919	up	PREDICTED: myosin heavy chain, muscle isoform X13 [Dendroctonus ponderosae]	19.78	------	------	------	------	------	------	------	------	------	------	PF00063	Myosin_head	Myosin head
TRINITY_DN18246_c0_g1	2.18789	2.95246e-06	3.78074e-05	up	-1.32928	6.9599e-05	0.000487487	down	PREDICTED: nucleolar protein 16 [Dendroctonus ponderosae] >AEE62146.1 unknown [Dendroctonus ponderosae] >ENN73571.1 hypothetical protein YQE_09819, partial [Dendroctonus ponderosae] >ERL89486.1 hypothetical protein D910_06852 [Dendroctonus ponderosae]	19	GO:0042273;GO:0005730	BP:ribosomal large subunit biogenesis;CC:nucleolus;	------	------	------	------	ENOG4111QB6	S:Function unknown	sp|Q5E996|NOP16_BOVIN;	Nucleolar protein 16 OS=Bos taurus OX=9913 GN=NOP16 PE=2 SV=1;	PF09420	Nop16	Ribosome biogenesis protein Nop16
TRINITY_DN18261_c0_g1	-4.14979	2.90215e-10	1.13875e-08	down	-2.87055	0.000438268	0.00238045	down	PREDICTED: uncharacterized protein LOC109537083 [Dendroctonus ponderosae] >ENN77563.1 hypothetical protein YQE_05859, partial [Dendroctonus ponderosae] >ERL88525.1 hypothetical protein D910_05911 [Dendroctonus ponderosae]	48.34	------	------	------	------	------	------	------	------	------	------	------	------	------
TRINITY_DN18284_c0_g2	-3.55307	4.00768e-10	1.53104e-08	down	-5.54992	3.52854e-05	0.000271434	down	PREDICTED: putative protein TPRXL isoform X2 [Dendroctonus ponderosae]	1974.01	GO:0016021	CC:integral component of membrane;	------	------	------	------	------	------	------	------	------	------	------
TRINITY_DN18331_c0_g1	-7.92548	3.91194e-36	5.66326e-33	down	-7.53964	9.06455e-06	8.44805e-05	down	hypothetical protein D910_04714 [Dendroctonus ponderosae]	179.95	------	------	------	------	------	------	------	------	------	------	PF16984;PF06585	Grp7_allergen;JHBP	Group 7 allergen;Haemolymph juvenile hormone binding protein
TRINITY_DN18355_c0_g1	-3.64815	0.000307756	0.00195952	down	5.10507	0.00173767	0.00755684	up	cytochrome c oxidase subunit	2.8	GO:0009060;GO:0006119;GO:0045277;GO:0016021;GO:0005743;GO:0004129;GO:0020037;GO:0046872	BP:aerobic respiration;BP:oxidative phosphorylation;CC:respiratory chain complex IV;CC:integral component of membrane;CC:mitochondrial inner membrane;MF:cytochrome-c oxidase activity;MF:heme binding;MF:metal ion binding;	K02256	COX1	map04932;map04260;map05012;map05010;map05016;map00190	Non-alcoholic fatty liver diseas;Cardiac muscle contraction;Parkinson's disease;Alzheimer's disease;Huntington's disease;Oxidative phosphorylation	COG0843	T:Signal transduction mechanisms	sp|P24893|COX1_CAEEL;	Cytochrome c oxidase subunit 1 OS=Caenorhabditis elegans OX=6239 GN=ctc-1 PE=3 SV=2;	PF00115	COX1	Cytochrome C and Quinol oxidase polypeptide I
TRINITY_DN18366_c0_g1	-1.24204	0.000923152	0.00488876	down	-1.31334	0.000386536	0.00213379	down	PREDICTED: NADH dehydrogenase [ubiquinone] 1 alpha subcomplex subunit 13-like [Dendroctonus ponderosae] >XP_019766465.1 PREDICTED: NADH dehydrogenase [ubiquinone] 1 alpha subcomplex subunit 13-like [Dendroctonus ponderosae] >ENN82650.1 hypothetical protein YQE_00976, partial [Dendroctonus ponderosae] >ENN82763.1 hypothetical protein YQE_00872, partial [Dendroctonus ponderosae] >ERL93536.1 hypothe…	220.01	GO:0016021	CC:integral component of membrane;	K11353	NDUFA13	map00190;map05012;map05010;map04723;map05016;map04932	Oxidative phosphorylation;Parkinson's disease;Alzheimer's disease;Retrograde endocannabinoid signaling;Huntington's disease;Non-alcoholic fatty liver diseas	ENOG4111KIB	U:Intracellular trafficking, secretion, and vesicular transport	sp|Q95KV7|NDUAD_BOVIN;	NADH dehydrogenase [ubiquinone] 1 alpha subcomplex subunit 13 OS=Bos taurus OX=9913 GN=NDUFA13 PE=1 SV=3;	PF06212	GRIM-19	GRIM-19 protein
TRINITY_DN18387_c0_g1	-7.62814	2.14369e-15	2.43654e-13	down	-8.16697	2.17112e-08	4.04071e-07	down	PREDICTED: uncharacterized protein LOC109536022 [Dendroctonus ponderosae]	7.03	GO:0042545;GO:0045490;GO:0030599;GO:0045330	BP:cell wall modification;BP:pectin catabolic process;MF:pectinesterase activity;MF:aspartyl esterase activity;	K01051	E3.1.1.11	map00040	Pentose and glucuronate interconversions	COG4677	G:Carbohydrate transport and metabolism	sp|Q47474|PMEB_DICD3;	Pectinesterase B OS=Dickeya dadantii;	PF01095	Pectinesterase	Pectinesterase
TRINITY_DN18443_c0_g1	-1.96826	0.00186864	0.00871171	down	-2.00071	7.06108e-12	2.77558e-10	down	PREDICTED: GTP:AMP phosphotransferase AK3, mitochondrial [Dendroctonus ponderosae] >ENN76868.1 hypothetical protein YQE_06709, partial [Dendroctonus ponderosae] >ERL94644.1 hypothetical protein D910_11919 [Dendroctonus ponderosae]	54.25	GO:0046039;GO:0006172;GO:0046041;GO:0046033;GO:0005739;GO:0005759;GO:0005524;GO:0004017;GO:0046899;GO:0005525	BP:GTP metabolic process;BP:ADP biosynthetic process;BP:ITP metabolic process;BP:AMP metabolic process;CC:mitochondrion;CC:mitochondrial matrix;MF:ATP binding;MF:adenylate kinase activity;MF:nucleoside triphosphate adenylate kinase activity;MF:GTP binding;	K00944	AK3	map00230	Purine metabolism	COG0563	S:Function unknown	sp|Q9WTP7|KAD3_MOUSE;	GTP:AMP phosphotransferase AK3, mitochondrial OS=Mus musculus OX=10090 GN=Ak3 PE=1 SV=3;	PF00406;PF13207;PF13238;PF05191	ADK;AAA_17;AAA_18;ADK_lid	Adenylate kinase;AAA domain;AAA domain;Adenylate kinase, active site lid
TRINITY_DN18467_c0_g1	-3.54005	6.93214e-08	1.46561e-06	down	-6.73684	1.59661e-06	1.82345e-05	down	PREDICTED: endoglucanase-like [Dendroctonus ponderosae] >ENN82048.1 hypothetical protein YQE_01623, partial [Dendroctonus ponderosae]	33.22	GO:0006355;GO:0005975;GO:0003690;GO:0008810	BP:regulation of transcription, DNA-templated;BP:carbohydrate metabolic process;MF:double-stranded DNA binding;MF:cellulase activity;	------	------	------	------	ENOG410Z8DT	G:Carbohydrate transport and metabolism	sp|O97401|GUN_PHACE;	Endoglucanase OS=Phaedon cochleariae OX=80249 PE=2 SV=1;	PF02015	Glyco_hydro_45	Glycosyl hydrolase family 45
TRINITY_DN18516_c0_g1	-2.55313	0.000137751	0.000999728	down	-2.39137	0.00151627	0.00676827	down	PREDICTED: sialin-like isoform X1 [Dendroctonus ponderosae]	4.26	GO:0055085;GO:0016021	BP:transmembrane transport;CC:integral component of membrane;	K08193	SLC17A	------	------	ENOG410XPWC	S:Function unknown	sp|Q8BN82|S17A5_MOUSE;	Sialin OS=Mus musculus OX=10090 GN=Slc17a5 PE=1 SV=2;	PF07690	MFS_1	Major Facilitator Superfamily
TRINITY_DN18525_c0_g2	-5.74958	1.07265e-05	0.000114981	down	-9.61704	1.55846e-15	1.25219e-13	down	PREDICTED: uncharacterized protein LOC109542843 [Dendroctonus ponderosae] >ENN72590.1 hypothetical protein YQE_10691, partial [Dendroctonus ponderosae]	627.62	------	------	------	------	------	------	------	------	------	------	------	------	------
TRINITY_DN18585_c1_g2	-2.61639	0.000323254	0.00204072	down	-2.15035	0.00237957	0.00984148	down	PREDICTED: guanine nucleotide-binding protein	11.6	GO:0007188;GO:0005834;GO:0031683;GO:0003924;GO:0001664;GO:0046872;GO:0005525	BP:adenylate cyclase-modulating G-protein coupled receptor signaling pathway;CC:heterotrimeric G-protein complex;MF:G-protein beta/gamma-subunit complex binding;MF:GTPase activity;MF:G-protein coupled receptor binding;MF:metal ion binding;MF:GTP binding;	K04534	GNAO, G-ALPHA-O	map05142;map04724;map05145;map04015;map04723;map04728;map04921;map04713;map04916;map05034;map04726;map04725;map04727;map04730;map04915;map05032	Chagas diseas;Glutamatergic synapse;Toxoplasmosis;Rap1 signaling pathway;Retrograde endocannabinoid signaling;Dopaminergic synapse;Oxytocin signaling pathway;Circadian entrainment;Melanogenesis;Alcoholism;Serotonergic synapse;Cholinergic synapse;GABAergic synapse;Long-term depression;Estrogen signaling pathway;Morphine addiction	ENOG410XNVQ	S:Function unknown	sp|P38404|GNAO_LOCMI;	Guanine nucleotide-binding protein;	PF00503;PF00025	G-alpha;Arf	G-protein alpha subunit;ADP-ribosylation factor family
TRINITY_DN18603_c0_g1	-3.76166	1.84024e-07	3.4317e-06	down	5.32772	8.13723e-05	0.000555653	up		165.16	------	------	------	------	------	------	------	------	------	------	------	------	------
TRINITY_DN18611_c0_g1	-2.72592	9.87807e-07	1.47107e-05	down	-4.329	1.15445e-06	1.36816e-05	down	PREDICTED: uncharacterized protein LOC109545295 [Dendroctonus ponderosae] >ENN70602.1 hypothetical protein YQE_12777, partial [Dendroctonus ponderosae] >ERL85857.1 hypothetical protein D910_03272 [Dendroctonus ponderosae]	465.8	------	------	------	------	------	------	------	------	------	------	PF15868	MBF2	Transcription activator MBF2
TRINITY_DN18637_c0_g1	1.21772	0.0018725	0.00872522	up	3.08298	0.000707549	0.00356295	up	PREDICTED: pre-mRNA-processing factor 40 homolog A [Dendroctonus ponderosae] >ENN74007.1 hypothetical protein YQE_09397, partial [Dendroctonus ponderosae]	6.04	GO:0045292;GO:0000398;GO:0005685;GO:0071004;GO:0003723	BP:mRNA cis splicing, via spliceosome;BP:mRNA splicing, via spliceosome;CC:U1 snRNP;CC:U2-type prespliceosome;MF:RNA binding;	K12821	PRPF40, PRP40	map03040	Spliceosome	COG5104	A:RNA processing and modification	sp|Q80W14|PR40B_MOUSE;	Pre-mRNA-processing factor 40 homolog B OS=Mus musculus OX=10090 GN=Prpf40b PE=1 SV=2;	PF00397;PF01846	WW;FF	WW domain;FF domain
TRINITY_DN18683_c0_g1	-3.28292	0.000639893	0.003606	down	-3.96312	0.000727661	0.0036441	down	PREDICTED: propionyl-CoA carboxylase alpha chain, mitochondrial-like isoform X1 [Dendroctonus ponderosae]	1.04	GO:0046872;GO:0016874;GO:0005524	MF:metal ion binding;MF:ligase activity;MF:ATP binding;	K01965	PCCA, pccA	map00630;map00280;map00640	Glyoxylate and dicarboxylate metabolism;Valine, leucine and isoleucine degradation;Propanoate metabolism	COG4770	S:Function unknown	sp|P14882|PCCA_RAT;	Propionyl-CoA carboxylase alpha chain, mitochondrial OS=Rattus norvegicus OX=10116 GN=Pcca PE=1 SV=3;	PF02786;PF00289;PF02785;PF18140;PF00364;PF07478;PF02222;PF13533;PF02655;PF08443	CPSase_L_D2;Biotin_carb_N;Biotin_carb_C;PCC_BT;Biotin_lipoyl;Dala_Dala_lig_C;ATP-grasp;Biotin_lipoyl_2;ATP-grasp_3;RimK	Carbamoyl-phosphate synthase L chain, ATP binding domain;Biotin carboxylase, N-terminal domain;Biotin carboxylase C-terminal domain;Propionyl-coenzyme A carboxylase BT domain;Biotin-requiring enzyme;D-ala D-ala ligase C-terminus;ATP-grasp domain;Biotin-lipoyl like;ATP-grasp domain;RimK-like ATP-grasp domain
TRINITY_DN18702_c0_g1	-5.17383	1.4803e-09	4.93541e-08	down	-5.10222	2.69668e-06	2.89152e-05	down	hypothetical protein D910_03673 [Dendroctonus ponderosae]	12.53	GO:0006629;GO:0016042;GO:0016788	BP:lipid metabolic process;BP:lipid catabolic process;MF:hydrolase activity, acting on ester bonds;	K01052	LIPA	map04142;map00100	Lysosome;Steroid biosynthesis	COG0596	S:Function unknown	sp|Q9Z0M5|LICH_MOUSE;	Lysosomal acid lipase/cholesteryl ester hydrolase OS=Mus musculus OX=10090 GN=Lipa PE=1 SV=2;	PF04083;PF00561	Abhydro_lipase;Abhydrolase_1	Partial alpha/beta-hydrolase lipase region;alpha/beta hydrolase fold
TRINITY_DN18754_c0_g1	-3.79491	2.06347e-05	0.000200912	down	-7.4563	6.94419e-05	0.000486574	down	PREDICTED: uncharacterized protein LOC109538794 [Dendroctonus ponderosae] >AEE63085.1 unknown [Dendroctonus ponderosae] >ERL91726.1 hypothetical protein D910_09053 [Dendroctonus ponderosae]	12.36	GO:0042545;GO:0045490;GO:0030599;GO:0045330	BP:cell wall modification;BP:pectin catabolic process;MF:pectinesterase activity;MF:aspartyl esterase activity;	K01051	E3.1.1.11	map00040	Pentose and glucuronate interconversions	COG4677	G:Carbohydrate transport and metabolism	sp|Q47474|PMEB_DICD3;	Pectinesterase B OS=Dickeya dadantii;	PF01095	Pectinesterase	Pectinesterase
TRINITY_DN18757_c0_g2	-2.00381	1.75498e-06	2.4076e-05	down	-2.23204	4.44592e-11	1.51568e-09	down	unknown [Dendroctonus ponderosae]	963.62	GO:0015986;GO:0045261;GO:0000275;GO:0046933;GO:0043531;GO:0005524	BP:ATP synthesis coupled proton transport;CC:proton-transporting ATP synthase complex, catalytic core;CC:mitochondrial proton-transporting ATP synthase complex, catalytic core;MF:proton-transporting ATP synthase activity, rotational mechanism;MF:ADP binding;MF:ATP binding;	K02132	ATPeF1A, ATP5A1, ATP1	map05012;map00190;map05010;map05016	Parkinson's disease;Oxidative phosphorylation;Alzheimer's disease;Huntington's disease	COG0056	C:Energy production and conversion	sp|P35381|ATPA_DROME;	ATP synthase subunit alpha, mitochondrial OS=Drosophila melanogaster OX=7227 GN=blw PE=1 SV=2;	PF00006;PF00306;PF02874	ATP-synt_ab;ATP-synt_ab_C;ATP-synt_ab_N	ATP synthase alpha/beta family, nucleotide-binding domain;ATP synthase alpha/beta chain, C terminal domain;ATP synthase alpha/beta family, beta-barrel domain
TRINITY_DN18782_c0_g1	2.21943	0.000922565	0.00488659	up	3.119	0.000688114	0.00348045	up	PREDICTED: protein FAM192A isoform X1 [Dendroctonus ponderosae] >ENN70654.1 hypothetical protein YQE_12599, partial [Dendroctonus ponderosae]	20.17	------	------	------	------	------	------	ENOG4111INN	S:Function unknown	sp|Q91WE2|PIP30_MOUSE;	PSME3-interacting protein OS=Mus musculus OX=10090 GN=Fam192a PE=1 SV=1;	PF10187	Nefa_Nip30_N	N-terminal domain of NEFA-interacting nuclear protein NIP30
TRINITY_DN18798_c0_g1	3.40364	2.45959e-12	1.48038e-10	up	4.92764	9.0742e-18	1.06777e-15	up		4.97	------	------	------	------	------	------	------	------	------	------	------	------	------
TRINITY_DN18828_c0_g1	-3.1044	1.99228e-07	3.66156e-06	down	-5.75877	1.70212e-05	0.000144597	down	PREDICTED: pancreatic triacylglycerol lipase-like [Dendroctonus ponderosae] >ENN80261.1 hypothetical protein YQE_03256, partial [Dendroctonus ponderosae]	135.99	GO:0006629;GO:0005576;GO:0008970;GO:0052689	BP:lipid metabolic process;CC:extracellular region;MF:phosphatidylcholine 1-acylhydrolase activity;MF:carboxylic ester hydrolase activity;	K19404	LIPH_I	------	------	ENOG410YGS3;ENOG4111JY5	S:Function unknown;	sp|Q6P8U6|LIPP_MOUSE;	Pancreatic triacylglycerol lipase OS=Mus musculus OX=10090 GN=Pnlip PE=1 SV=1;	PF00151;PF12697	Lipase;Abhydrolase_6	Lipase;Alpha/beta hydrolase family
TRINITY_DN18837_c0_g1	-5.10892	2.54936e-13	1.93709e-11	down	-6.00487	1.20927e-07	1.85188e-06	down	hypothetical protein D910_02408 [Dendroctonus ponderosae]	36.81	GO:0008234	MF:cysteine-type peptidase activity;	K01365	CTSL	map05205;map05323;map04612;map05418;map04145;map04210;map04142;map04140	Proteoglycans in cancer;Rheumatoid arthritis;Antigen processing and presentation;Fluid shear stress and atherosclerosis;Phagosome;Apoptosis;Lysosome;Autophagy - animal	COG4870	O:Posttranslational modification, protein turnover, chaperones	sp|P13277|CYSP1_HOMAM;	Digestive cysteine proteinase 1 OS=Homarus americanus OX=6706 GN=LCP1 PE=1 SV=2;	PF00112;PF08246;PF03051	Peptidase_C1;Inhibitor_I29;Peptidase_C1_2	Papain family cysteine protease;Cathepsin propeptide inhibitor domain;Peptidase C1-like family
TRINITY_DN18846_c0_g1	-4.65357	2.95582e-24	1.33283e-21	down	-7.97331	2.46532e-09	5.58571e-08	down		409.68	------	------	------	------	------	------	------	------	------	------	------	------	------
TRINITY_DN18855_c1_g1	-3.93842	1.29292e-09	4.3743e-08	down	-3.84652	5.20678e-10	1.36446e-08	down	PREDICTED: probable phospholipid-transporting ATPase IIB isoform X1 [Dendroctonus ponderosae]	34.3	GO:0006897;GO:0006890;GO:0045332;GO:0016021;GO:0005886;GO:0005768;GO:0005802;GO:0016787;GO:0004012;GO:0000287;GO:0005524	BP:endocytosis;BP:retrograde vesicle-mediated transport, Golgi to ER;BP:phospholipid translocation;CC:integral component of membrane;CC:plasma membrane;CC:endosome;CC:trans-Golgi network;MF:hydrolase activity;MF:phospholipid-translocating ATPase activity;MF:magnesium ion binding;MF:ATP binding;	------	------	------	------	------	------	------	------	------	------	------
TRINITY_DN18861_c0_g1	-3.38537	0.00148671	0.00720208	down	-6.05857	5.82685e-05	0.00041808	down	PREDICTED: LOW QUALITY PROTEIN: uncharacterized protein LOC109540122 [Dendroctonus ponderosae]	4.62	GO:0016021;GO:0005886	CC:integral component of membrane;CC:plasma membrane;	------	------	------	------	ENOG4111F2N;ENOG410Z7SK	S:Function unknown;	------	------	PF00057	Ldl_recept_a	Low-density lipoprotein receptor domain class A
TRINITY_DN18901_c0_g1	5.13891	2.67857e-05	0.000249822	up	7.03557	8.91723e-05	0.000601929	up	PREDICTED: FERM and PDZ domain-containing protein 4 isoform X2 [Dendroctonus ponderosae]	0.24	------	------	------	------	------	------	------	------	------	------	------	------	------
TRINITY_DN18910_c0_g1	2.47242	1.49365e-06	2.10258e-05	up	1.61872	2.74815e-08	4.94314e-07	up		2.57	------	------	------	------	------	------	------	------	------	------	------	------	------
TRINITY_DN18927_c0_g1	-5.55202	6.07332e-26	3.27555e-23	down	-5.20701	3.60172e-05	0.0002759	down	PREDICTED: cathepsin L1-like [Dendroctonus ponderosae] >ENN80397.1 hypothetical protein YQE_03181, partial [Dendroctonus ponderosae]	509.92	GO:0008234	MF:cysteine-type peptidase activity;	K01365	CTSL	map05205;map05323;map04612;map05418;map04145;map04210;map04142;map04140	Proteoglycans in cancer;Rheumatoid arthritis;Antigen processing and presentation;Fluid shear stress and atherosclerosis;Phagosome;Apoptosis;Lysosome;Autophagy - animal	COG4870	S:Function unknown	sp|P13277|CYSP1_HOMAM;	Digestive cysteine proteinase 1 OS=Homarus americanus OX=6706 GN=LCP1 PE=1 SV=2;	PF00112;PF08246	Peptidase_C1;Inhibitor_I29	Papain family cysteine protease;Cathepsin propeptide inhibitor domain
TRINITY_DN18975_c0_g1	-2.44824	0.000298268	0.00190916	down	-4.94542	4.50422e-09	9.80339e-08	down	hypothetical protein YQE_05229, partial [Dendroctonus ponderosae]	21.02	GO:0007155;GO:0042246;GO:0016021	BP:cell adhesion;BP:tissue regeneration;CC:integral component of membrane;	------	------	------	------	ENOG4111YA5;ENOG4111RPK	S:Function unknown;	sp|Q92982|NINJ1_HUMAN;	Ninjurin-1 OS=Homo sapiens OX=9606 GN=NINJ1 PE=1 SV=2;	PF04923	Ninjurin	Ninjurin
TRINITY_DN18983_c0_g1	-1.33149	0.00212589	0.00966971	down	2.5276	8.44213e-05	0.000573254	up	hypothetical protein D910_11902 [Dendroctonus ponderosae]	68.04	------	------	------	------	------	------	ENOG410Y3IA	S:Function unknown	------	------	PF17054	JUPITER	Microtubule-Associated protein Jupiter
TRINITY_DN18984_c0_g1	-2.7916	3.86938e-05	0.000342884	down	-5.43125	3.99024e-07	5.39896e-06	down	PREDICTED: myrosinase 1-like [Dendroctonus ponderosae] >AEE63189.1 unknown [Dendroctonus ponderosae] >ENN74525.1 hypothetical protein YQE_08849, partial [Dendroctonus ponderosae]	31.7	GO:0005975;GO:0008422;GO:0004553	BP:carbohydrate metabolic process;MF:beta-glucosidase activity;MF:hydrolase activity, hydrolyzing O-glycosyl compounds;	------	------	------	------	COG2723	G:Carbohydrate transport and metabolism	sp|Q95X01|MYRO1_BREBR;	Myrosinase 1 OS=Brevicoryne brassicae OX=69196 PE=1 SV=1;	PF00232	Glyco_hydro_1	Glycosyl hydrolase family 1
TRINITY_DN18999_c0_g1	-2.40654	7.79622e-05	0.000617279	down	-5.15458	3.48842e-10	9.55334e-09	down	PREDICTED: N-acetylneuraminate lyase-like isoform X2 [Dendroctonus ponderosae]	26.72	GO:0016829	MF:lyase activity;	K01639	E4.1.3.3, nanA, NPL	map00520	Amino sugar and nucleotide sugar metabolism	COG0329	E:Amino acid transport and metabolism	sp|Q5ZKD4|NPL_CHICK;	N-acetylneuraminate lyase OS=Gallus gallus OX=9031 GN=NPL PE=2 SV=1;	PF00701	DHDPS	Dihydrodipicolinate synthetase family
TRINITY_DN19004_c0_g1	-4.36198	4.49271e-14	3.98634e-12	down	-3.28274	0.00138289	0.00627425	down	PREDICTED: microtubule-associated protein futsch-like isoform X1 [Dendroctonus ponderosae]	4.86	------	------	K17582	MKI67	------	------	ENOG410ZXYW	T:Signal transduction mechanisms	------	------	PF16697	Yop-YscD_cpl	Inner membrane component of T3SS, cytoplasmic domain
TRINITY_DN19007_c0_g1	-3.16988	7.16531e-06	8.14417e-05	down	-4.87214	8.99536e-16	7.49161e-14	down		2.54	------	------	------	------	------	------	------	------	------	------	------	------	------
TRINITY_DN19014_c0_g1	-2.55872	0.00179498	0.00842684	down	-8.20713	3.98215e-07	5.39206e-06	down	unknown [Dendroctonus ponderosae]	25.09	GO:0016787;GO:0004104;GO:0003676;GO:0008168	MF:hydrolase activity;MF:cholinesterase activity;MF:nucleic acid binding;MF:methyltransferase activity;	------	------	------	------	COG2272	I:Lipid transport and metabolism	sp|B2D0J5|EST6_APIME;	Venom carboxylesterase-6 OS=Apis mellifera OX=7460 PE=2 SV=1;	PF00135;PF07859	COesterase;Abhydrolase_3	Carboxylesterase family;alpha/beta hydrolase fold
TRINITY_DN19035_c0_g1	2.26444	2.12012e-05	0.000205338	up	4.26328	2.22705e-09	5.10321e-08	up	hypothetical protein YQE_04242, partial [Dendroctonus ponderosae] >ERL86420.1 hypothetical protein D910_03827 [Dendroctonus ponderosae]	38.55	------	------	------	------	------	------	------	------	------	------	------	------	------
TRINITY_DN19053_c0_g1	-2.28403	7.00415e-06	7.99735e-05	down	-2.04407	0.0014235	0.0064313	down	PREDICTED: uncharacterized protein LOC109546117, partial [Dendroctonus ponderosae]	3.36	GO:0003682	MF:chromatin binding;	------	------	------	------	ENOG4111IRW;ENOG410XQP1	S:Function unknown;	------	------	------	------	------
TRINITY_DN19067_c0_g1	-3.42773	1.86886e-09	6.08341e-08	down	-4.47524	0.000850956	0.00415878	down	hypothetical protein D910_11139 [Dendroctonus ponderosae]	19.1	GO:0016021	CC:integral component of membrane;	------	------	------	------	ENOG410YGM5	S:Function unknown	------	------	------	------	------
TRINITY_DN19074_c0_g1	4.82554	1.79971e-11	9.2184e-10	up	-3.2337	0.000322175	0.00182716	down	PREDICTED: venom acid phosphatase Acph-1-like [Dendroctonus ponderosae] >ENN83161.1 hypothetical protein YQE_00479, partial [Dendroctonus ponderosae]	38.63	GO:0003993	MF:acid phosphatase activity;	K19283	ACPP	------	------	ENOG410ZVBQ	S:Function unknown	sp|Q5BLY5|ACPH1_APIME;	Venom acid phosphatase Acph-1 OS=Apis mellifera OX=7460 PE=1 SV=1;	PF00328	His_Phos_2	Histidine phosphatase superfamily
TRINITY_DN19094_c0_g1	6.31551	4.47849e-11	2.06341e-09	up	-4.8981	0.00169529	0.00741592	down	hypothetical protein YQE_04301, partial [Dendroctonus ponderosae]	0.39	GO:0005975;GO:0006032;GO:0005576;GO:0008061;GO:0004553;GO:0004568	BP:carbohydrate metabolic process;BP:chitin catabolic process;CC:extracellular region;MF:chitin binding;MF:hydrolase activity, hydrolyzing O-glycosyl compounds;MF:chitinase activity;	K01183	E3.2.1.14	map00520	Amino sugar and nucleotide sugar metabolism	COG3325	G:Carbohydrate transport and metabolism	sp|Q95M17|CHIA_BOVIN;	Acidic mammalian chitinase OS=Bos taurus OX=9913 GN=CHIA PE=1 SV=1;	PF00704	Glyco_hydro_18	Glycosyl hydrolases family 18
TRINITY_DN19163_c0_g1	1.52184	0.000264033	0.00172595	up	2.68239	6.25934e-07	8.0059e-06	up	PREDICTED: arrestin domain-containing protein 4 isoform X1 [Dendroctonus ponderosae] >ENN81127.1 hypothetical protein YQE_02495, partial [Dendroctonus ponderosae] >ERL85242.1 hypothetical protein D910_02663 [Dendroctonus ponderosae] >ERL96050.1 hypothetical protein D910_00892 [Dendroctonus ponderosae] >ERL96112.1 hypothetical protein D910_01061 [Dendroctonus ponderosae]	7.91	------	------	------	------	------	------	ENOG41102NY	S:Function unknown	sp|Q6TXF1|ARRD3_RAT;	Arrestin domain-containing protein 3 OS=Rattus norvegicus OX=10116 GN=Arrdc3 PE=2 SV=1;	PF02752	Arrestin_C	Arrestin
TRINITY_DN19249_c0_g1	-2.14584	0.000835671	0.00449647	down	-6.41035	4.86144e-07	6.402e-06	down	hypothetical protein YQE_04751, partial [Dendroctonus ponderosae]	46.62	GO:0005763	CC:mitochondrial small ribosomal subunit;	------	------	------	------	------	------	------	------	PF06585	JHBP	Haemolymph juvenile hormone binding protein
TRINITY_DN19259_c0_g1	-2.87209	0.000176106	0.00122943	down	-6.29376	1.08105e-07	1.68267e-06	down	reverse transcriptase [Lasius niger]	8.63	GO:0003964;GO:0004519;GO:0046872;GO:0004190;GO:0003676	MF:RNA-directed DNA polymerase activity;MF:endonuclease activity;MF:metal ion binding;MF:aspartic-type endopeptidase activity;MF:nucleic acid binding;	------	------	------	------	ENOG410XS82;ENOG410ZMYA	S:Function unknown;	sp|P16423|POLR_DROME;	Retrovirus-related Pol polyprotein from type-2 retrotransposable element R2DM OS=Drosophila melanogaster OX=7227 GN=pol PE=4 SV=1;	------	------	------
TRINITY_DN19274_c1_g3	1.15475	0.00146332	0.00711006	up	-2.14333	2.21605e-06	2.43338e-05	down	PREDICTED: 60S ribosomal protein L8 [Dendroctonus ponderosae] >AEE62804.1 unknown [Dendroctonus ponderosae] >ENN77183.1 hypothetical protein YQE_06321, partial [Dendroctonus ponderosae]	224.62	GO:0002181;GO:0006412;GO:0022625;GO:0005840;GO:0003735	BP:cytoplasmic translation;BP:translation;CC:cytosolic large ribosomal subunit;CC:ribosome;MF:structural constituent of ribosome;	K02938	RP-L8e, RPL8	map03010	Ribosome	COG0090	J:Translation, ribosomal structure and biogenesis	sp|Q6RYS3|RL8_MAMBR;	60S ribosomal protein L8 OS=Mamestra brassicae OX=55057 GN=RpL8 PE=2 SV=1;	PF03947;PF00181	Ribosomal_L2_C;Ribosomal_L2	Ribosomal Proteins L2, C-terminal domain;Ribosomal Proteins L2, RNA binding domain
TRINITY_DN19281_c0_g1	-3.66676	1.7386e-05	0.000174037	down	-6.4391	1.12796e-07	1.74346e-06	down	hypothetical protein YQE_04026, partial [Dendroctonus ponderosae]	5.26	------	------	------	------	------	------	ENOG410YVIA	S:Function unknown	------	------	------	------	------
TRINITY_DN19314_c0_g1	1.55093	0.00216104	0.00979269	up	-1.58564	0.000564819	0.00294588	down	PREDICTED: guanine nucleotide-binding protein subunit alpha homolog [Dendroctonus ponderosae] >ENN73380.1 hypothetical protein YQE_10007, partial [Dendroctonus ponderosae]	12.17	GO:0007188;GO:0007266;GO:0007186;GO:0005834;GO:0031526;GO:0031683;GO:0031752;GO:0003924;GO:0001664;GO:0005525	BP:adenylate cyclase-modulating G-protein coupled receptor signaling pathway;BP:Rho protein signal transduction;BP:G-protein coupled receptor signaling pathway;CC:heterotrimeric G-protein complex;CC:brush border membrane;MF:G-protein beta/gamma-subunit complex binding;MF:D5 dopamine receptor binding;MF:GTPase activity;MF:G-protein coupled receptor binding;MF:GTP binding;	K04346	GNA12	map04810;map05200;map04010;map04270;map04022;map04072;map04071;map04730	Regulation of actin cytoskeleton;Pathways in cancer;MAPK signaling pathway;Vascular smooth muscle contraction;cGMP-PKG signaling pathway;Phospholipase D signaling pathway;Sphingolipid signaling pathway;Long-term depression	ENOG410XNVQ	K:Transcription	sp|P25157|GNAL_DROME;	Guanine nucleotide-binding protein subunit alpha homolog OS=Drosophila melanogaster OX=7227 GN=cta PE=2 SV=1;	PF00503;PF00025	G-alpha;Arf	G-protein alpha subunit;ADP-ribosylation factor family
TRINITY_DN19322_c4_g1	2.49079	3.39319e-05	0.000307118	up	2.51316	0.000608135	0.00314393	up	PREDICTED: coiled-coil domain-containing protein 25 [Dendroctonus ponderosae] >AEE62061.1 unknown [Dendroctonus ponderosae] >ENN75120.1 hypothetical protein YQE_08301, partial [Dendroctonus ponderosae] >ERL84835.1 hypothetical protein D910_02259 [Dendroctonus ponderosae]	12.78	------	------	------	------	------	------	ENOG410Z5JK	S:Function unknown	sp|Q7T312|CCD25_DANRE;	Coiled-coil domain-containing protein 25 OS=Danio rerio OX=7955 GN=ccdc25 PE=1 SV=1;	PF05670	NFACT-R_1	NFACT protein RNA binding domain
TRINITY_DN19332_c0_g2	-2.70027	1.86884e-11	9.53699e-10	down	-1.20432	3.72003e-05	0.000283534	down	PREDICTED: protein charybde-like [Dendroctonus ponderosae] >ENN70515.1 hypothetical protein YQE_12691, partial [Dendroctonus ponderosae]	162.1	GO:0009968;GO:0005737	BP:negative regulation of signal transduction;CC:cytoplasm;	------	------	------	------	ENOG4111V50	S:Function unknown	sp|Q9VTI8|CHRB_DROME;	Protein charybde OS=Drosophila melanogaster OX=7227 GN=chrb PE=2 SV=2;	PF07809	RTP801_C	RTP801 C-terminal region
TRINITY_DN19486_c2_g1	2.63085	9.70017e-12	5.21119e-10	up	3.25629	1.26004e-20	2.23124e-18	up	PREDICTED: cAMP-responsive element-binding protein-like 2 isoform X1 [Dendroctonus ponderosae] >XP_019770915.1 PREDICTED: cAMP-responsive element-binding protein-like 2 isoform X1 [Dendroctonus ponderosae] >AEE63279.1 unknown [Dendroctonus ponderosae]	17.75	GO:0003700	MF:transcription factor activity, sequence-specific DNA binding;	------	------	------	------	ENOG4111T4Y	K:Transcription	sp|A4IGK3|CRBL2_XENTR;	cAMP-responsive element-binding protein-like 2 OS=Xenopus tropicalis OX=8364 GN=crebl2 PE=3 SV=1;	PF07716;PF00170	bZIP_2;bZIP_1	Basic region leucine zipper;bZIP transcription factor
TRINITY_DN19493_c0_g3	-1.39306	0.000329926	0.00207522	down	-3.0375	5.56859e-11	1.84738e-09	down	PREDICTED: protein transport protein Sec61 subunit alpha [Dendroctonus ponderosae] >AEE61607.1 unknown [Dendroctonus ponderosae] >ENN70407.1 hypothetical protein YQE_12913, partial [Dendroctonus ponderosae] >ERL83812.1 hypothetical protein D910_01065 [Dendroctonus ponderosae] >ERL84392.1 hypothetical protein D910_01825 [Dendroctonus ponderosae] >ERL93225.1 hypothetical protein D910_10521 [Dendroc…	76.57	GO:0006620;GO:0006616;GO:0015031;GO:0005784;GO:0005789;GO:0016021;GO:0005783;GO:0005048;GO:0008320	BP:posttranslational protein targeting to membrane;BP:SRP-dependent cotranslational protein targeting to membrane, translocation;BP:protein transport;CC:Sec61 translocon complex;CC:endoplasmic reticulum membrane;CC:integral component of membrane;CC:endoplasmic reticulum;MF:signal sequence binding;MF:protein transmembrane transporter activity;	K10956	SEC61A	map04145;map03060;map04141;map05110	Phagosome;Protein export;Protein processing in endoplasmic reticulum;Vibrio cholerae infection	COG0201	U:Intracellular trafficking, secretion, and vesicular transport	sp|Q2KHX4|S61A2_BOVIN;	Protein transport protein Sec61 subunit alpha isoform 2 OS=Bos taurus OX=9913 GN=SEC61A2 PE=2 SV=3;	PF00344;PF10559	SecY;Plug_translocon	SecY translocase;Plug domain of Sec61p
TRINITY_DN19494_c0_g1	-2.51578	0.00110489	0.00565204	down	-2.54368	0.00226247	0.00944284	down	PREDICTED: probable galactose-1-phosphate uridylyltransferase [Dendroctonus ponderosae] >AEE62161.1 unknown [Dendroctonus ponderosae] >ENN79734.1 hypothetical protein YQE_03790, partial [Dendroctonus ponderosae] >ERL86036.1 hypothetical protein D910_03450 [Dendroctonus ponderosae]	2.06	GO:0033499;GO:0008270;GO:0008108	BP:galactose catabolic process via UDP-galactose;MF:zinc ion binding;MF:UDP-glucos;	K00965	galT, GALT	map00520;map00052;map04917	Amino sugar and nucleotide sugar metabolism;Galactose metabolism;Prolactin signaling pathway	COG1085	G:Carbohydrate transport and metabolism	sp|Q9VMA2|GALT_DROME;	Probable galactose-1-phosphate uridylyltransferase OS=Drosophila melanogaster OX=7227 GN=Galt PE=2 SV=2;	PF01087;PF02744	GalP_UDP_transf;GalP_UDP_tr_C	Galactose-1-phosphate uridyl transferase, N-terminal domain;Galactose-1-phosphate uridyl transferase, C-terminal domain
TRINITY_DN19517_c0_g1	-3.87058	0.00043552	0.00262822	down	-2.85214	0.00106603	0.00504104	down	PREDICTED: proton-associated sugar transporter A isoform X2 [Dendroctonus ponderosae]	0.63	GO:0008643;GO:0016021;GO:0016020;GO:0008506	BP:carbohydrate transport;CC:integral component of membrane;CC:membrane;MF:sucros;	K15378	SLC45A1_2_4	------	------	ENOG410ZVZX;ENOG4110218;ENOG410XPTR	G:Carbohydrate transport and metabolism;S:Function unknown;U:Intracellular trafficking, secretion, and vesicular transport	sp|P58355|S45A2_MOUSE;	Membrane-associated transporter protein OS=Mus musculus OX=10090 GN=Slc45a2 PE=1 SV=1;	PF07690;PF13347	MFS_1;MFS_2	Major Facilitator Superfamily;MFS/sugar transport protein
TRINITY_DN19532_c0_g1	-4.15561	3.7638e-07	6.34746e-06	down	-6.40864	2.67432e-08	4.82941e-07	down		29.18	------	------	------	------	------	------	------	------	------	------	------	------	------
TRINITY_DN19532_c0_g3	-4.21844	0.000169398	0.00119077	down	-5.24509	0.000368393	0.00204861	down		11.93	------	------	------	------	------	------	------	------	------	------	------	------	------
TRINITY_DN19532_c0_g5	-3.40639	0.00135177	0.0066682	down	-4.28079	0.00229005	0.00953173	down		88.89	------	------	------	------	------	------	------	------	------	------	------	------	------
TRINITY_DN19533_c0_g1	2.26289	6.1143e-05	0.00050263	up	1.61964	0.00208924	0.00886796	up	PREDICTED: elongator complex protein 5 [Dendroctonus ponderosae] >ENN77648.1 hypothetical protein YQE_05942, partial [Dendroctonus ponderosae]	6.13	GO:0002098;GO:0033588	BP:tRNA wobble uridine modification;CC:Elongator holoenzyme complex;	------	------	------	------	ENOG411201Y;ENOG4110SSI	K:Transcription;S:Function unknown	sp|A1A5V9|ELP5_DANRE;	Elongator complex protein 5 OS=Danio rerio OX=7955 GN=elp5 PE=2 SV=1;	PF10483	Elong_Iki1	Elongator subunit Iki1
TRINITY_DN19534_c0_g2	-2.2232	0.00132386	0.00655246	down	-3.16318	0.0018225	0.00786759	down	PREDICTED: facilitated trehalose transporter Tret1-like [Dendroctonus ponderosae] >XP_019760060.1 PREDICTED: facilitated trehalose transporter Tret1-like [Dendroctonus ponderosae] >XP_019760142.1 PREDICTED: facilitated trehalose transporter Tret1-like [Dendroctonus ponderosae] >XP_019760150.1 PREDICTED: facilitated trehalose transporter Tret1-like [Dendroctonus ponderosae]	2.86	GO:0016021;GO:0005887;GO:0022857;GO:0005351	CC:integral component of membrane;CC:integral component of plasma membrane;MF:transmembrane transporter activity;MF:suga;	K08145	SLC2A8, GLUT8	------	------	ENOG410XNQK	G:Carbohydrate transport and metabolism	sp|A9ZSY2|TRET1_APILI;	Facilitated trehalose transporter Tret1 OS=Apis mellifera ligustica OX=7469 GN=Tret1 PE=1 SV=1;	PF00083;PF07690	Sugar_tr;MFS_1	Sugar;Major Facilitator Superfamily
TRINITY_DN19535_c0_g2	2.41928	4.47977e-05	0.000387519	up	2.24545	7.34282e-05	0.000509223	up	PREDICTED: zinc finger CCHC domain-containing protein 10-like [Dendroctonus ponderosae]	14.17	GO:0008270;GO:0003676	MF:zinc ion binding;MF:nucleic acid binding;	------	------	------	------	ENOG410XUV5	S:Function unknown	sp|Q8TBK6|ZCH10_HUMAN;	Zinc finger CCHC domain-containing protein 10 OS=Homo sapiens OX=9606 GN=ZCCHC10 PE=1 SV=1;	PF13917;PF04889	zf-CCHC_3;Cwf_Cwc_15	Zinc knuckle;Cwf15/Cwc15 cell cycle control protein
TRINITY_DN19585_c0_g1	-4.90655	7.14781e-22	2.36877e-19	down	-6.2908	1.15362e-10	3.58448e-09	down	hypothetical protein YQE_06287, partial [Dendroctonus ponderosae]	396.47	------	------	------	------	------	------	ENOG410Z24F;ENOG410XTCC	S:Function unknown;	------	------	PF06585	JHBP	Haemolymph juvenile hormone binding protein
TRINITY_DN19601_c4_g2	-4.91417	0.000184333	0.00127714	down	-7.01444	2.9907e-06	3.14757e-05	down		0.3	------	------	------	------	------	------	------	------	------	------	------	------	------
TRINITY_DN19622_c0_g1	-5.30776	7.46138e-25	3.80061e-22	down	-7.45718	2.8775e-06	3.04695e-05	down	unknown [Dendroctonus ponderosae]	37.65	GO:0071555;GO:0005975;GO:0005576;GO:0004650	BP:cell wall organization;BP:carbohydrate metabolic process;CC:extracellular region;MF:polygalacturonase activity;	K01213;K01184	E3.2.1.67;E3.2.1.15	map00040	Pentose and glucuronate interconversions	COG5434	S:Function unknown	sp|O97400|PGLR_PHACE;	Polygalacturonase OS=Phaedon cochleariae OX=80249 PE=2 SV=1;	PF00295	Glyco_hydro_28	Glycosyl hydrolases family 28
TRINITY_DN19630_c0_g1	-3.52568	2.45909e-05	0.000232041	down	-9.24129	4.63726e-17	4.88896e-15	down	hypothetical protein YQE_08382, partial [Dendroctonus ponderosae]	3.53	GO:0009116;GO:0005737;GO:0004731;GO:0016788	BP:nucleoside metabolic process;CC:cytoplasm;MF:purine-nucleoside phosphorylase activity;MF:hydrolase activity, acting on ester bonds;	K03783	punA, PNP	map00240;map00230;map00760	Pyrimidine metabolism;Purine metabolism;Nicotinate and nicotinamide metabolism	COG0005	O:Posttranslational modification, protein turnover, chaperones	sp|P46354|PUNA_BACSU;	Purine nucleoside phosphorylase 1 OS=Bacillus subtilis;	PF01048	PNP_UDP_1	Phosphorylase superfamily
TRINITY_DN19635_c1_g1	-1.11044	0.00103832	0.00537552	down	-1.54934	6.35677e-05	0.000451484	down	PREDICTED: phosphoglucomutase [Dendroctonus ponderosae] >ENN77623.1 hypothetical protein YQE_05917, partial [Dendroctonus ponderosae] >ERL90249.1 hypothetical protein D910_07601 [Dendroctonus ponderosae]	34.54	GO:0005975;GO:0004674;GO:0000287;GO:0005524;GO:0016868	BP:carbohydrate metabolic process;MF:protein serine/threonine kinase activity;MF:magnesium ion binding;MF:ATP binding;MF:intramolecular transferase activity, phosphotransferases;	K01835	pgm	map00230;map00520;map00052;map00010;map00500;map00030	Purine metabolism;Amino sugar and nucleotide sugar metabolism;Galactose metabolism;Glycolysis / Gluconeogenesis;Starch and sucrose metabolism;Pentose phosphate pathway	COG0033	G:Carbohydrate transport and metabolism	sp|Q9VUY9|PGM_DROME;	Phosphoglucomutase OS=Drosophila melanogaster OX=7227 GN=Pgm PE=1 SV=1;	PF02878;PF02880;PF02879;PF00408	PGM_PMM_I;PGM_PMM_III;PGM_PMM_II;PGM_PMM_IV	Phosphoglucomutase/phosphomannomutase, alpha/beta/alpha domain I;Phosphoglucomutase/phosphomannomutase, alpha/beta/alpha domain III;Phosphoglucomutase/phosphomannomutase, alpha/beta/alpha domain II;Phosphoglucomutase/phosphomannomutase, C-terminal domain
TRINITY_DN19652_c0_g1	-1.93348	0.00109928	0.00563018	down	-1.66675	9.02371e-05	0.000607992	down	PREDICTED: hydroxymethylglutaryl-CoA lyase, mitochondrial isoform X2 [Dendroctonus ponderosae]	3.68	GO:0006629;GO:0006552;GO:0046951;GO:0005829;GO:0016021;GO:0004419	BP:lipid metabolic process;BP:leucine catabolic process;BP:ketone body biosynthetic process;CC:cytosol;CC:integral component of membrane;MF:hydroxymethylglutaryl-CoA lyase activity;	K01640	E4.1.3.4, HMGCL, hmgL	map04146;map00280;map00072;map00650	Peroxisome;Valine, leucine and isoleucine degradation;Synthesis and degradation of ketone bodies;Butanoate metabolism	COG0119	S:Function unknown	sp|D4A5C3|HMGC2_RAT;	3-hydroxymethyl-3-methylglutaryl-CoA lyase, cytoplasmic OS=Rattus norvegicus OX=10116 GN=Hmgcll1 PE=1 SV=1;	PF00682	HMGL-like	HMGL-like
TRINITY_DN19666_c0_g1	1.2886	0.00168471	0.00797585	up	-1.78079	8.01893e-06	7.55851e-05	down	unknown [Dendroctonus ponderosae] >ERL93864.1 hypothetical protein D910_11150 [Dendroctonus ponderosae]	27.28	GO:0006457;GO:0005737;GO:0005832;GO:0051082;GO:0005524	BP:protein folding;CC:cytoplasm;CC:chaperonin-containing T-complex;MF:unfolded protein binding;MF:ATP binding;	K09499	CCT7	------	------	COG0459	P:Inorganic ion transport and metabolism	sp|Q5ZJK8|TCPH_CHICK;	T-complex protein 1 subunit eta OS=Gallus gallus OX=9031 GN=CCT7 PE=1 SV=1;	PF00118	Cpn60_TCP1	TCP-1/cpn60 chaperonin family
TRINITY_DN19667_c1_g1	1.71522	0.000488322	0.00288731	up	2.20499	0.000194686	0.0011856	up		8.39	------	------	------	------	------	------	------	------	------	------	------	------	------
TRINITY_DN19691_c0_g1	-1.67663	1.26173e-06	1.81988e-05	down	-2.47861	1.93331e-07	2.82545e-06	down	unknown [Dendroctonus ponderosae] >ERL86465.1 hypothetical protein D910_03871 [Dendroctonus ponderosae]	69.03	GO:0006633;GO:0006636;GO:0005789;GO:0016021;GO:0016717;GO:0005506	BP:fatty acid biosynthetic process;BP:unsaturated fatty acid biosynthetic process;CC:endoplasmic reticulum membrane;CC:integral component of membrane;MF:oxidoreductase activity, acting on paired donors, with oxidation of a pair of donors resulting in the reduction of molecular oxygen to two molecules of water;MF:iron ion binding;	K00507	SCD, desC	map04212;map03320;map01040;map04152	Longevity regulating pathway - worm;PPAR signaling pathway;Biosynthesis of unsaturated fatty acids;AMPK signaling pathway	COG1398	S:Function unknown	sp|O00767|ACOD_HUMAN;	Acyl-CoA desaturase OS=Homo sapiens OX=9606 GN=SCD PE=1 SV=2;	PF00487	FA_desaturase	Fatty acid desaturase
TRINITY_DN19697_c0_g1	-8.44583	2.36022e-42	4.63715e-39	down	-6.51486	1.2482e-07	1.90829e-06	down	unknown [Dendroctonus ponderosae]	221.36	GO:0051603;GO:0050790;GO:0005764;GO:0005615;GO:0004197	BP:proteolysis involved in cellular protein catabolic process;BP:regulation of catalytic activity;CC:lysosome;CC:extracellular space;MF:cysteine-type endopeptidase activity;	K01363	CTSB	map04142;map04621;map04924;map04210;map04612;map04140	Lysosome;NOD-like receptor signaling pathway;Renin secretion;Apoptosis;Antigen processing and presentation;Autophagy - animal	COG4870	O:Posttranslational modification, protein turnover, chaperones	sp|Q5R6D1|CATB_PONAB;	Cathepsin B OS=Pongo abelii OX=9601 GN=CTSB PE=2 SV=1;	PF00112;PF08127;PF03051	Peptidase_C1;Propeptide_C1;Peptidase_C1_2	Papain family cysteine protease;Peptidase family C1 propeptide;Peptidase C1-like family
TRINITY_DN19709_c2_g1	-4.50918	1.59612e-08	4.07263e-07	down	-4.6547	1.06473e-17	1.22909e-15	down	hypothetical protein B5V51_4051 [Heliothis virescens]	20.7	GO:0003964;GO:0004519	MF:RNA-directed DNA polymerase activity;MF:endonuclease activity;	K12852	EFTUD2	map03040	Spliceosome	ENOG4111T4U;ENOG4111CYT	S:Function unknown;	------	------	------	------	------
TRINITY_DN19749_c1_g1	-3.50368	3.04659e-15	3.31223e-13	down	-3.16286	7.28383e-05	0.000506673	down	PREDICTED: uncharacterized protein LOC109540558 isoform X2 [Dendroctonus ponderosae]	614.65	GO:0016021	CC:integral component of membrane;	------	------	------	------	------	------	------	------	------	------	------
TRINITY_DN19761_c0_g1	-2.77625	0.000172319	0.0012079	down	-4.7356	3.45183e-09	7.65913e-08	down	PREDICTED: lysosomal Pro-X carboxypeptidase-like [Dendroctonus ponderosae] >AEE61895.1 unknown [Dendroctonus ponderosae] >ENN80326.1 hypothetical protein YQE_03319, partial [Dendroctonus ponderosae] >ERL94775.1 hypothetical protein D910_12049 [Dendroctonus ponderosae]	22.87	GO:0006508;GO:0008239;GO:0004180;GO:0008236	BP:proteolysis;MF:dipeptidyl-peptidase activity;MF:carboxypeptidase activity;MF:serine-type peptidase activity;	K01285	PRCP	map04614;map04974	Renin-angiotensin system;Protein digestion and absorption	ENOG410Y38A	S:Function unknown	sp|Q2TA14|PCP_BOVIN;	Lysosomal Pro-X carboxypeptidase OS=Bos taurus OX=9913 GN=PRCP PE=2 SV=1;	PF05577;PF12146	Peptidase_S28;Hydrolase_4	Serine carboxypeptidase S28;Serine aminopeptidase, S33
TRINITY_DN19794_c0_g1	-10.206	1.83232e-39	3.35999e-36	down	-4.93645	0.00037287	0.00206962	down	hypothetical protein D910_11222 [Dendroctonus ponderosae]	456.2	GO:0008234	MF:cysteine-type peptidase activity;	K01365;K15621;K01368	CTSL;BAIAP3;CTSS	map05152;map05205;map05202;map05323;map04612;map05418;map04145;map04210;map04142;map04140	Tuberculosis;Proteoglycans in cancer;Transcriptional misregulation in cancer;Rheumatoid arthritis;Antigen processing and presentation;Fluid shear stress and atherosclerosis;Phagosome;Apoptosis;Lysosome;Autophagy - animal	COG4870	O:Posttranslational modification, protein turnover, chaperones	sp|O97397|CATLL_PHACE;	Cathepsin L-like proteinase OS=Phaedon cochleariae OX=80249 PE=2 SV=1;	PF00112;PF08246	Peptidase_C1;Inhibitor_I29	Papain family cysteine protease;Cathepsin propeptide inhibitor domain
TRINITY_DN19801_c0_g1	1.95603	0.00121528	0.00611219	up	2.75859	0.00169438	0.00741592	up	PREDICTED: signal recognition particle subunit SRP72 [Dendroctonus ponderosae] >ENN76861.1 hypothetical protein YQE_06702, partial [Dendroctonus ponderosae] >ERL94651.1 hypothetical protein D910_11926 [Dendroctonus ponderosae]	5.51	GO:0006614;GO:0005786;GO:0048500;GO:0008312	BP:SRP-dependent cotranslational protein targeting to membrane;CC:signal recognition particle, endoplasmic reticulum targeting;CC:signal recognition particle;MF:7S RNA binding;	K03108	SRP72	map03060	Protein export	ENOG410XRWI	U:Intracellular trafficking, secretion, and vesicular transport	sp|O76094|SRP72_HUMAN;	Signal recognition particle subunit SRP72 OS=Homo sapiens OX=9606 GN=SRP72 PE=1 SV=3;	PF08492;PF13428	SRP72;TPR_14	SRP72 RNA-binding domain;Tetratricopeptide repeat
TRINITY_DN19827_c0_g1	-3.07124	3.80815e-05	0.000338111	down	-2.26394	0.000880227	0.00428005	down	PREDICTED: lactosylceramide 4-alpha-galactosyltransferase-like [Dendroctonus ponderosae] >AEE63354.1 unknown [Dendroctonus ponderosae]	10.51	GO:0016757	MF:transferase activity, transferring glycosyl groups;	K01988	A4GALT	map00601;map00603	Glycosphingolipid biosynthesis - lacto and neolacto series;Glycosphingolipid biosynthesis - globo and isoglobo series	ENOG4111PD8	S:Function unknown	sp|Q67BJ4|A4GAT_MOUSE;	Lactosylceramide 4-alpha-galactosyltransferase OS=Mus musculus OX=10090 GN=A4galt PE=2 SV=1;	PF04572;PF04488	Gb3_synth;Gly_transf_sug	Alpha 1,4-glycosyltransferase conserved region;Glycosyltransferase sugar-binding region containing DXD motif
TRINITY_DN19831_c0_g2	-2.94905	1.53332e-12	9.67649e-11	down	-2.78977	5.59839e-07	7.24692e-06	down	PREDICTED: malate dehydrogenase, cytoplasmic [Dendroctonus ponderosae] >AEE61610.1 unknown [Dendroctonus ponderosae] >ERL94450.1 hypothetical protein D910_11727 [Dendroctonus ponderosae]	325.56	GO:0005975;GO:0006099;GO:0006734;GO:0006107;GO:0006108;GO:0005829;GO:0030060	BP:carbohydrate metabolic process;BP:tricarboxylic acid cycle;BP:NADH metabolic process;BP:oxaloacetate metabolic process;BP:malate metabolic process;CC:cytosol;MF:L-malate dehydrogenase activity;	K00025	MDH1	map00020;map00630;map04964;map00620;map00270	Citrate cycl;Glyoxylate and dicarboxylate metabolism;Proximal tubule bicarbonate reclamation;Pyruvate metabolism;Cysteine and methionine metabolism	COG0039	S:Function unknown	sp|Q5ZME2|MDHC_CHICK;	Malate dehydrogenase, cytoplasmic OS=Gallus gallus OX=9031 GN=MDH1 PE=2 SV=1;	PF00056;PF02866	Ldh_1_N;Ldh_1_C	lactate/malate dehydrogenase, NAD binding domain;lactate/malate dehydrogenase, alpha/beta C-terminal domain
TRINITY_DN19835_c0_g1	-3.19463	9.85803e-08	1.99967e-06	down	-3.06839	2.82778e-05	0.000224928	down	PREDICTED: trafficking kinesin-binding protein milt isoform X1 [Dendroctonus ponderosae]	14.79	GO:0008104;GO:0047496;GO:0006605;GO:0048311;GO:0005737;GO:0031410;GO:0005739;GO:0017022	BP:protein localization;BP:vesicle transport along microtubule;BP:protein targeting;BP:mitochondrion distribution;CC:cytoplasm;CC:cytoplasmic vesicle;CC:mitochondrion;MF:myosin binding;	K15369	TRAK1	------	------	ENOG410XSWD	U:Intracellular trafficking, secretion, and vesicular transport	sp|O60296|TRAK2_HUMAN;	Trafficking kinesin-binding protein 2 OS=Homo sapiens OX=9606 GN=TRAK2 PE=1 SV=2;	PF04849	HAP1_N	HAP1 N-terminal conserved region
TRINITY_DN19842_c0_g1	1.66773	0.00129939	0.00646312	up	1.83493	0.000123534	0.000798984	up	unknown [Dendroctonus ponderosae]	15.24	GO:0016021	CC:integral component of membrane;	------	------	------	------	ENOG4112B12	S:Function unknown	------	------	------	------	------
TRINITY_DN19846_c0_g1	-2.84468	2.14018e-05	0.000206554	down	-7.27993	3.01393e-08	5.36304e-07	down	PREDICTED: uncharacterized family 31 glucosidase KIAA1161-like [Dendroctonus ponderosae] >AEE62077.1 unknown [Dendroctonus ponderosae]	9.43	GO:0005975;GO:0004553	BP:carbohydrate metabolic process;MF:hydrolase activity, hydrolyzing O-glycosyl compounds;	------	------	------	------	COG1501	G:Carbohydrate transport and metabolism	sp|Q69ZQ1|MYORG_MOUSE;	Myogenesis-regulating glycosidase OS=Mus musculus OX=10090 GN=Myorg PE=1 SV=2;	PF01055	Glyco_hydro_31	Glycosyl hydrolases family 31
TRINITY_DN19851_c0_g1	-3.03573	6.18317e-08	1.31943e-06	down	-7.57289	4.15398e-07	5.58644e-06	down	PREDICTED: glucose dehydrogenase [FAD, quinone]-like [Dendroctonus ponderosae] >AEE62205.1 unknown [Dendroctonus ponderosae]	67.71	GO:0050660;GO:0016614	MF:flavin adenine dinucleotide binding;MF:oxidoreductase activity, acting on CH-OH group of donors;	K00115	GLD	map00030	Pentose phosphate pathway	COG2303	J:Translation, ribosomal structure and biogenesis	sp|P18173|DHGL_DROME;	Glucose dehydrogenase [FAD, quinone] OS=Drosophila melanogaster OX=7227 GN=Gld PE=3 SV=3;	PF00732;PF05199	GMC_oxred_N;GMC_oxred_C	GMC oxidoreductase;GMC oxidoreductase
TRINITY_DN19865_c0_g1	2.0032	0.00111278	0.00568711	up	2.13236	1.19762e-07	1.83867e-06	up	PREDICTED: probable ATP-dependent RNA helicase Dbp73D [Dendroctonus ponderosae] >ENN70712.1 hypothetical protein YQE_12657, partial [Dendroctonus ponderosae] >ERL93709.1 hypothetical protein D910_10996 [Dendroctonus ponderosae]	5.03	GO:0003676;GO:0005524;GO:0004386	MF:nucleic acid binding;MF:ATP binding;MF:helicase activity;	K14807	DDX51, DBP6	------	------	ENOG410XRWM	L:Replication, recombination and repair	sp|P26802|DDX51_DROME;	Probable ATP-dependent RNA helicase Dbp73D OS=Drosophila melanogaster OX=7227 GN=Dbp73D PE=2 SV=3;	PF00270;PF00271;PF04851	DEAD;Helicase_C;ResIII	DEAD/DEAH box helicase;Helicase conserved C-terminal domain;Type III restriction enzyme, res subunit
TRINITY_DN19883_c0_g1	-2.21953	0.0002351	0.00156502	down	-4.80837	4.1782e-06	4.22195e-05	down	hypothetical protein D910_08627 [Dendroctonus ponderosae]	3.34	GO:0016021;GO:0016747	CC:integral component of membrane;MF:transferase activity, transferring acyl groups other than amino-acyl groups;	------	------	------	------	ENOG410YD1T	S:Function unknown	sp|Q8BML2|OACYL_MOUSE;	O-acyltransferase like protein OS=Mus musculus OX=10090 GN=Oacyl PE=2 SV=1;	PF01757	Acyl_transf_3	Acyltransferase family
TRINITY_DN19884_c3_g1	1.30321	0.00130864	0.00649971	up	2.25649	1.2729e-10	3.89538e-09	up	PREDICTED: coiled-coil domain-containing protein 28A isoform X1 [Dendroctonus ponderosae]	13.11	------	------	------	------	------	------	ENOG4111KYE	S:Function unknown	sp|Q8IWP9|CC28A_HUMAN;	Coiled-coil domain-containing protein 28A OS=Homo sapiens OX=9606 GN=CCDC28A PE=1 SV=1;	PF13270	DUF4061	Domain of unknown function
TRINITY_DN19912_c2_g2	-1.9684	1.84851e-07	3.44014e-06	down	-2.39513	2.81029e-10	7.84944e-09	down	PREDICTED: uncharacterized protein LOC109534972 isoform X1 [Dendroctonus ponderosae] >XP_019756335.1 PREDICTED: uncharacterized protein LOC109534973 isoform X1 [Dendroctonus ponderosae] >XP_019760791.1 PREDICTED: uncharacterized protein LOC109538138 isoform X1 [Dendroctonus ponderosae]	13.06	GO:0005634;GO:0003677	CC:nucleus;MF:DNA binding;	------	------	------	------	ENOG4111M2U;ENOG410YJCA;ENOG410Y941	B:Chromatin structure and dynamics;S:Function unknown;B:Chromatin structure and dynamics	sp|Q8VBW5|BBX_MOUSE;	HMG box transcription factor BBX OS=Mus musculus OX=10090 GN=Bbx PE=1 SV=2;	PF00505;PF09011	HMG_box;HMG_box_2	HMG;HMG-box domain
TRINITY_DN19935_c0_g1	-5.45818	9.68489e-20	2.24227e-17	down	-7.80137	1.12788e-09	2.74285e-08	down	PREDICTED: beta-1,3-glucan-binding protein-like [Dendroctonus ponderosae] >ENN83076.1 hypothetical protein YQE_00562, partial [Dendroctonus ponderosae]	97.11	GO:0005975;GO:0009986;GO:0001530;GO:0001872;GO:0004553	BP:carbohydrate metabolic process;CC:cell surface;MF:lipopolysaccharide binding;MF:;MF:hydrolase activity, hydrolyzing O-glycosyl compounds;	------	------	------	------	COG2273	G:Carbohydrate transport and metabolism	sp|Q8N0N3|BGBP_PENMO;	Beta-1,3-glucan-binding protein OS=Penaeus monodon OX=6687 PE=2 SV=1;	PF00722	Glyco_hydro_16	Glycosyl hydrolases family 16
TRINITY_DN19948_c0_g1	-3.55044	3.28571e-15	3.51661e-13	down	-3.36916	2.6233e-07	3.689e-06	down	PREDICTED: XK-related protein 6-like isoform X1 [Dendroctonus ponderosae] >ENN78087.1 hypothetical protein YQE_05241, partial [Dendroctonus ponderosae] >ERL87492.1 hypothetical protein D910_04884 [Dendroctonus ponderosae]	17.5	GO:0070782;GO:0043652;GO:1902742;GO:0016021;GO:0016020;GO:0005886	BP:phosphatidylserine exposure on apoptotic cell surface;BP:engulfment of apoptotic cell;BP:apoptotic process involved in development;CC:integral component of membrane;CC:membrane;CC:plasma membrane;	------	------	------	------	ENOG410YRUD	Z:Cytoskeleton	sp|Q5GH73|XKR6_HUMAN;	XK-related protein 6 OS=Homo sapiens OX=9606 GN=XKR6 PE=2 SV=1;	PF09815	XK-related	XK-related protein
TRINITY_DN19955_c0_g1	1.71197	0.000722939	0.003993	up	2.08723	2.06822e-14	1.34331e-12	up	hypothetical protein YQE_08509, partial [Dendroctonus ponderosae]	11.93	GO:0006890;GO:0001522;GO:0006396;GO:0016021;GO:0009982;GO:0003723;GO:0005484	BP:retrograde vesicle-mediated transport, Golgi to ER;BP:pseudouridine synthesis;BP:RNA processing;CC:integral component of membrane;MF:pseudouridine synthase activity;MF:RNA binding;MF:SNAP receptor activity;	------	------	------	------	ENOG4111IF0	S:Function unknown	sp|Q99614|TTC1_HUMAN;	Tetratricopeptide repeat protein 1 OS=Homo sapiens OX=9606 GN=TTC1 PE=1 SV=1;	PF00515;PF07719;PF13181;PF13428	TPR_1;TPR_2;TPR_8;TPR_14	Tetratricopeptide repeat;Tetratricopeptide repeat;Tetratricopeptide repeat;Tetratricopeptide repeat
TRINITY_DN19968_c0_g1	4.67005	8.39188e-06	9.32258e-05	up	4.99204	3.72142e-07	5.07286e-06	up	PREDICTED: heat shock 70 kDa protein 4 isoform X1 [Dendroctonus ponderosae] >ENN79035.1 hypothetical protein YQE_04502, partial [Dendroctonus ponderosae]	0.09	GO:0005524	MF:ATP binding;	------	------	------	------	------	------	------	------	------	------	------
TRINITY_DN19989_c0_g1	-3.84745	7.17119e-27	4.28806e-24	down	-6.10417	1.74557e-29	1.51607e-26	down	unknown [Dendroctonus ponderosae]	179.66	GO:0016021;GO:0005576	CC:integral component of membrane;CC:extracellular region;	------	------	------	------	ENOG410ZS9E	S:Function unknown	sp|Q6UXP7|F151B_HUMAN;	Protein FAM151B OS=Homo sapiens OX=9606 GN=FAM151B PE=1 SV=2;	PF10223	DUF2181	Uncharacterized conserved protein
TRINITY_DN19991_c0_g1	-4.75964	0.00064152	0.00361295	down	-2.62957	3.81108e-05	0.000289024	down	uncharacterized protein LOC111362674 [Spodoptera litura]	0.73	GO:0003964;GO:0004519	MF:RNA-directed DNA polymerase activity;MF:endonuclease activity;	------	------	------	------	------	------	------	------	------	------	------
TRINITY_DN19993_c2_g2	2.10938	1.12378e-06	1.64332e-05	up	3.47376	1.19229e-05	0.000106756	up	PREDICTED: nucleolin-like isoform X1 [Dendroctonus ponderosae] >ENN77849.1 hypothetical protein YQE_05676, partial [Dendroctonus ponderosae]	6.56	GO:0006297;GO:1904161;GO:0006260;GO:0006271;GO:0043625;GO:0003887	BP:nucleotide-excision repair, DNA gap filling;BP:DNA synthesis involved in UV-damage excision repair;BP:DNA replication;BP:DNA strand elongation involved in DNA replication;CC:delta DNA polymerase complex;MF:DNA-directed DNA polymerase activity;	K03504	POLD3	map00230;map03430;map03420;map00240;map03410;map03030;map03440	Purine metabolism;Mismatch repair;Nucleotide excision repair;Pyrimidine metabolism;Base excision repair;DNA replication;Homologous recombination	ENOG4111Y87	S:Function unknown	------	------	PF09507	CDC27	DNA polymerase subunit Cdc27
TRINITY_DN20031_c0_g1	2.22363	0.000494046	0.00291346	up	3.42999	1.69172e-05	0.000143781	up	PREDICTED: probable peptide chain release factor C12orf65, mitochondrial isoform X1 [Dendroctonus ponderosae]	14.03	GO:0005762;GO:0003747	CC:mitochondrial large ribosomal subunit;MF:translation release factor activity;	------	------	------	------	COG0216;COG1186	J:Translation, ribosomal structure and biogenesis;	sp|Q80VP5|CL065_MOUSE;	Probable peptide chain release factor C12orf65 homolog, mitochondrial OS=Mus musculus OX=10090 PE=1 SV=1;	PF00472	RF-1	RF-1 domain
TRINITY_DN20032_c0_g2	-1.89245	0.000188082	0.00129626	down	2.5144	4.57808e-07	6.05948e-06	up	PREDICTED: CD63 antigen-like [Dendroctonus ponderosae]	26.91	GO:0016021;GO:0005887	CC:integral component of membrane;CC:integral component of plasma membrane;	K17353	TSPAN18	------	------	ENOG4111IRY	S:Function unknown	sp|P27701|CD82_HUMAN;	CD82 antigen OS=Homo sapiens OX=9606 GN=CD82 PE=1 SV=1;	PF00335	Tetraspanin	Tetraspanin family
TRINITY_DN20039_c0_g2	-2.43747	0.000196015	0.00134219	down	-1.85822	3.00254e-08	5.34799e-07	down	PREDICTED: calcium-binding mitochondrial carrier protein SCaMC-2 [Dendroctonus ponderosae] >ENN81792.1 hypothetical protein YQE_01800, partial [Dendroctonus ponderosae] >ERL88684.1 hypothetical protein D910_06068 [Dendroctonus ponderosae]	19.65	GO:0016021;GO:0005347;GO:0022857;GO:0005509	CC:integral component of membrane;MF:ATP transmembrane transporter activity;MF:transmembrane transporter activity;MF:calcium ion binding;	K14684	SLC25A23S	------	------	ENOG410XQ4P	S:Function unknown	sp|Q66L49|SCMC1_DANRE;	Calcium-binding mitochondrial carrier protein SCaMC-1 OS=Danio rerio OX=7955 GN=slc25a24 PE=2 SV=1;	PF00153;PF13499;PF13405;PF00036;PF13202;PF13833	Mito_carr;EF-hand_7;EF-hand_6;EF-hand_1;EF-hand_5;EF-hand_8	Mitochondrial carrier protein;EF-hand domain pair;EF-hand domain;EF hand;EF hand;EF-hand domain pair
TRINITY_DN20043_c0_g1	-2.928	3.31647e-05	0.000301264	down	5.67665	6.8847e-05	0.000482776	up	PREDICTED: uncharacterized protein LOC109546387 [Dendroctonus ponderosae]	1.15	GO:0016021	CC:integral component of membrane;	------	------	------	------	ENOG4111HK9	S:Function unknown	------	------	PF13927;PF13895;PF07686;PF08205	Ig_3;Ig_2;V-set;C2-set_2	Immunoglobulin domain;Immunoglobulin domain;Immunoglobulin V-set domain;CD80-like C2-set immunoglobulin domain
TRINITY_DN20068_c0_g1	-6.91233	4.34489e-51	2.39021e-47	down	-6.42029	5.5767e-06	5.4773e-05	down	unknown [Dendroctonus ponderosae]	191.66	GO:0050790;GO:0004197	BP:regulation of catalytic activity;MF:cysteine-type endopeptidase activity;	K01363	CTSB	map04142;map04621;map04924;map04210;map04612;map04140	Lysosome;NOD-like receptor signaling pathway;Renin secretion;Apoptosis;Antigen processing and presentation;Autophagy - animal	COG4870	O:Posttranslational modification, protein turnover, chaperones	sp|P07688|CATB_BOVIN;	Cathepsin B OS=Bos taurus OX=9913 GN=CTSB PE=1 SV=5;	PF00112;PF08127;PF03051	Peptidase_C1;Propeptide_C1;Peptidase_C1_2	Papain family cysteine protease;Peptidase family C1 propeptide;Peptidase C1-like family
TRINITY_DN20094_c0_g1	2.21633	0.000326237	0.00205531	up	3.49289	2.03165e-06	2.25396e-05	up	PREDICTED: uncharacterized protein LOC109540890 isoform X1 [Dendroctonus ponderosae] >ENN74250.1 hypothetical protein YQE_09222, partial [Dendroctonus ponderosae]	5.36	GO:0043966;GO:0006357;GO:0043967;GO:0000124;GO:0005671;GO:0003713	BP:histone H3 acetylation;BP:regulation of transcription from RNA polymerase II promoter;BP:histone H4 acetylation;CC:SAGA complex;CC:Ada2/Gcn5/Ada3 transcription activator complex;MF:transcription coactivator activity;	K11315	TADA3, ADA3, NGG1	------	------	ENOG410XQUH	K:Transcription	------	------	------	------	------
TRINITY_DN20100_c0_g1	-3.93038	1.07856e-11	5.72718e-10	down	-4.25627	5.26592e-20	8.65271e-18	down	PREDICTED: integrin beta-PS isoform X1 [Dendroctonus ponderosae]	34.09	GO:0007155;GO:0007229;GO:0016021	BP:cell adhesion;BP:integrin-mediated signaling pathway;CC:integral component of membrane;	K05719	ITGB1, CD29	map05140;map05145;map04015;map04810;map05131;map05130;map05133;map04145;map05222;map04514;map05205;map04510;map04512;map05200;map04360;map05414;map05412;map04530;map05410;map04670;map05100;map04151;map04611	Leishmaniasis;Toxoplasmosis;Rap1 signaling pathway;Regulation of actin cytoskeleton;Shigellosis;Pathogenic Escherichia coli infection;Pertussis;Phagosome;Small cell lung cancer;Cell adhesion molecule;Proteoglycans in cancer;Focal adhesion;ECM-receptor interaction;Pathways in cancer;Axon guidance;Dilated cardiomyopathy;Arrhythmogenic right ventricular cardiomyopath;Tight junction;Hypertrophic card…	ENOG410XP60	U:Intracellular trafficking, secretion, and vesicular transport	sp|P11584|ITBX_DROME;	Integrin beta-PS OS=Drosophila melanogaster OX=7227 GN=mys PE=1 SV=3;	PF00362;PF17205;PF01437	Integrin_beta;PSI_integrin;PSI	Integrin beta chain VWA domain;Integrin plexin domain;Plexin repeat
TRINITY_DN20121_c3_g2	-2.14734	0.00188185	0.00876432	down	-1.88837	0.000144495	0.000915085	down		27.42	------	------	------	------	------	------	------	------	------	------	------	------	------
TRINITY_DN20126_c0_g1	-6.25636	1.67496e-21	5.00777e-19	down	-7.9803	2.17768e-19	3.28254e-17	down	unknown [Dendroctonus ponderosae]	34.98	GO:0051603;GO:0004185	BP:proteolysis involved in cellular protein catabolic process;MF:serine-type carboxypeptidase activity;	K09646	SCPEP1	------	------	COG2939	E:Amino acid transport and metabolism	sp|Q920A6|RISC_RAT;	Retinoid-inducible serine carboxypeptidase OS=Rattus norvegicus OX=10116 GN=Scpep1 PE=2 SV=1;	PF00450	Peptidase_S10	Serine carboxypeptidase
TRINITY_DN20129_c0_g1	-3.15829	8.50632e-05	0.00066357	down	-4.11721	3.54223e-05	0.000272143	down	PREDICTED: uncharacterized protein LOC109539936 [Dendroctonus ponderosae] >XP_019763579.1 PREDICTED: uncharacterized protein LOC109539936 [Dendroctonus ponderosae]	5.77	------	------	------	------	------	------	ENOG4111QUW	S:Function unknown	------	------	PF12762	DDE_Tnp_IS1595	ISXO2-like transposase domain
TRINITY_DN20136_c0_g1	1.23619	0.00179711	0.00843395	up	-1.58181	0.000221586	0.00132509	down	PREDICTED: ER membrane protein complex subunit 10-like isoform X1 [Dendroctonus ponderosae] >XP_019764779.1 PREDICTED: ER membrane protein complex subunit 10-like isoform X2 [Dendroctonus ponderosae] >ENN74426.1 hypothetical protein YQE_08983, partial [Dendroctonus ponderosae] >ERL92372.1 hypothetical protein D910_09686 [Dendroctonus ponderosae]	9.92	GO:0016021;GO:0072546	CC:integral component of membrane;CC:ER membrane protein complex;	------	------	------	------	ENOG4111PEN	S:Function unknown	sp|Q6P7K5|EMC10_XENTR;	ER membrane protein complex subunit 10 OS=Xenopus tropicalis OX=8364 GN=emc10 PE=2 SV=1;	------	------	------
TRINITY_DN20141_c0_g1	-2.44334	1.08871e-06	1.59797e-05	down	7.49165	2.64212e-06	2.83803e-05	up		46.32	------	------	------	------	------	------	------	------	------	------	------	------	------
TRINITY_DN20175_c0_g1	-1.69945	0.00186662	0.00870667	down	1.90305	0.00191565	0.00823076	up	hypothetical protein YQE_12563, partial [Dendroctonus ponderosae]	37.85	GO:0016021	CC:integral component of membrane;	------	------	------	------	ENOG410YZS2;ENOG4111RI3	S:Function unknown;	------	------	------	------	------
TRINITY_DN20184_c0_g1	-6.2583	3.81304e-28	2.68927e-25	down	-5.88767	3.64075e-10	9.92581e-09	down	PREDICTED: facilitated trehalose transporter Tret1-like [Dendroctonus ponderosae]	55.22	GO:0008643;GO:0016021;GO:0005887;GO:0022857;GO:0005351	BP:carbohydrate transport;CC:integral component of membrane;CC:integral component of plasma membrane;MF:transmembrane transporter activity;MF:suga;	K08145	SLC2A8, GLUT8	------	------	ENOG410XNQK	G:Carbohydrate transport and metabolism	sp|Q17NV8|TRET1_AEDAE;	Facilitated trehalose transporter Tret1 OS=Aedes aegypti OX=7159 GN=Tret1 PE=3 SV=1;	PF00083;PF07690	Sugar_tr;MFS_1	Sugar;Major Facilitator Superfamily
TRINITY_DN20185_c0_g1	1.6755	0.000986898	0.00515782	up	2.43047	0.000516043	0.00272815	up	PREDICTED: probable ATP-dependent RNA helicase DDX56 [Dendroctonus ponderosae]	7.29	GO:0003676;GO:0005524;GO:0004386	MF:nucleic acid binding;MF:ATP binding;MF:helicase activity;	K14810	DDX56, DBP9	------	------	ENOG410XR15	L:Replication, recombination and repair	sp|Q9D0R4|DDX56_MOUSE;	Probable ATP-dependent RNA helicase DDX56 OS=Mus musculus OX=10090 GN=Ddx56 PE=2 SV=1;	PF00270;PF00271;PF04851	DEAD;Helicase_C;ResIII	DEAD/DEAH box helicase;Helicase conserved C-terminal domain;Type III restriction enzyme, res subunit
TRINITY_DN20203_c0_g5	2.28728	0.000174431	0.00121991	up	4.58878	1.26069e-06	1.47675e-05	up		1.12	------	------	------	------	------	------	------	------	------	------	------	------	------
TRINITY_DN20205_c0_g1	-3.78874	0.00139923	0.00686048	down	-4.41222	0.00213615	0.00902715	down		4.25	------	------	------	------	------	------	------	------	------	------	------	------	------
TRINITY_DN20206_c0_g1	1.79323	4.48015e-05	0.000387519	up	-2.87051	3.43182e-14	2.10043e-12	down	PREDICTED: KRR1 small subunit processome component homolog [Dendroctonus ponderosae]	9.35	GO:0007275;GO:0006364;GO:0005730;GO:1990904;GO:0005654;GO:0003723	BP:multicellular organism development;BP:rRNA processing;CC:nucleolus;CC:ribonucleoprotein complex;CC:nucleoplasm;MF:RNA binding;	K06961	KRR1	------	------	COG1094	S:Function unknown	sp|B4KF66|KRR1_DROMO;	KRR1 small subunit processome component homolog OS=Drosophila mojavensis OX=7230 GN=dbe PE=3 SV=1;	PF17903	KH_8	Krr1 KH1 domain
TRINITY_DN20229_c0_g1	5.10398	2.72783e-15	3.01332e-13	up	-4.2168	7.63396e-05	0.000527209	down	PREDICTED: uncharacterized protein LOC109535252 isoform X1 [Dendroctonus ponderosae] >ENN79135.1 hypothetical protein YQE_04321, partial [Dendroctonus ponderosae]	5.26	------	------	------	------	------	------	------	------	------	------	------	------	------
TRINITY_DN20245_c0_g1	1.93028	2.36772e-07	4.24276e-06	up	1.88042	0.000376043	0.0020847	up	hypothetical protein YQE_03017, partial [Dendroctonus ponderosae]	9.12	GO:0006886;GO:0016192;GO:0016021;GO:0005623;GO:0005484	BP:intracellular protein transport;BP:vesicle-mediated transport;CC:integral component of membrane;CC:cell;MF:SNAP receptor activity;	K17569	GPATCH2	------	------	ENOG410ZN0K	S:Function unknown	------	------	------	------	------
TRINITY_DN20291_c0_g1	-2.20536	4.98319e-07	8.09135e-06	down	-2.15344	0.00237308	0.0098191	down	PREDICTED: translocator protein [Dendroctonus ponderosae] >ENN79201.1 hypothetical protein YQE_04385, partial [Dendroctonus ponderosae] >ERL91773.1 hypothetical protein D910_09099 [Dendroctonus ponderosae]	113.77	GO:0016021	CC:integral component of membrane;	K05770	TSPO, BZRP	map05166;map04080;map04214	HTLV-I infection;Neuroactive ligand-receptor interaction;Apoptosis - fly	COG3476	T:Signal transduction mechanisms	sp|P16257|TSPO_RAT;	Translocator protein OS=Rattus norvegicus OX=10116 GN=Tspo PE=1 SV=1;	PF03073	TspO_MBR	TspO/MBR family
TRINITY_DN20309_c0_g1	-4.33369	5.60965e-14	4.85217e-12	down	-7.40774	7.47775e-05	0.0005174	down	unknown [Dendroctonus ponderosae]	31.32	GO:0006004;GO:0016139;GO:0005764;GO:0004560	BP:fucose metabolic process;BP:glycoside catabolic process;CC:lysosome;MF:alpha-L-fucosidase activity;	K01206	FUCA	map00511	Other glycan degradation	COG3669	G:Carbohydrate transport and metabolism	sp|P17164|FUCO_RAT;	Tissue alpha-L-fucosidase OS=Rattus norvegicus OX=10116 GN=Fuca1 PE=1 SV=1;	PF01120;PF16757	Alpha_L_fucos;Fucosidase_C	Alpha-L-fucosidase;Alpha-L-fucosidase C-terminal domain
TRINITY_DN20314_c0_g1	-2.85066	1.44804e-05	0.000148286	down	-2.17641	7.30349e-05	0.000507654	down	PREDICTED: nuclear receptor subfamily 2 group C member 1 isoform X1 [Dendroctonus ponderosae]	9.39	GO:0005634;GO:0003700;GO:0043565;GO:0008270;GO:0003707	CC:nucleus;MF:transcription factor activity, sequence-specific DNA binding;MF:sequence-specific DNA binding;MF:zinc ion binding;MF:steroid hormone receptor activity;	K14031;K08543	NR2CN;NR2C1, TR2	------	------	ENOG410XRZC	L:Replication, recombination and repair	sp|Q28CK1|NR2C1_XENTR;	Nuclear receptor subfamily 2 group C member 1 OS=Xenopus tropicalis OX=8364 GN=nr2c1 PE=2 SV=1;	PF00104	Hormone_recep	Ligand-binding domain of nuclear hormone receptor
TRINITY_DN20316_c2_g3	-2.1248	0.00196521	0.00907877	down	-4.0705	0.00212361	0.00898665	down	PREDICTED: purine nucleoside phosphorylase-like [Dendroctonus ponderosae]	28.63	GO:0009116;GO:0005737;GO:0004731	BP:nucleoside metabolic process;CC:cytoplasm;MF:purine-nucleoside phosphorylase activity;	K03783	punA, PNP	map00240;map00230;map00760	Pyrimidine metabolism;Purine metabolism;Nicotinate and nicotinamide metabolism	COG0005	F:Nucleotide transport and metabolism	sp|P55859|PNPH_BOVIN;	Purine nucleoside phosphorylase OS=Bos taurus OX=9913 GN=PNP PE=1 SV=3;	PF01048	PNP_UDP_1	Phosphorylase superfamily
TRINITY_DN20319_c0_g1	-4.01044	0.000712699	0.00394357	down	-3.74163	0.000231445	0.00137727	down	PREDICTED: myrosinase 1-like [Dendroctonus ponderosae]	9.34	GO:0005975;GO:0008422;GO:0004553	BP:carbohydrate metabolic process;MF:beta-glucosidase activity;MF:hydrolase activity, hydrolyzing O-glycosyl compounds;	------	------	------	------	COG2723	G:Carbohydrate transport and metabolism	sp|Q95X01|MYRO1_BREBR;	Myrosinase 1 OS=Brevicoryne brassicae OX=69196 PE=1 SV=1;	PF00232	Glyco_hydro_1	Glycosyl hydrolase family 1
TRINITY_DN20336_c0_g1	-2.16983	2.98565e-07	5.18782e-06	down	2.60765	5.0931e-08	8.57738e-07	up	PREDICTED: myocyte-specific enhancer factor 2 isoform X3 [Dendroctonus ponderosae]	146.45	GO:0045944;GO:0005634;GO:0046983;GO:0000977;GO:0003677	BP:positive regulation of transcription from RNA polymerase II promoter;CC:nucleus;MF:protein dimerization activity;MF:RNA polymerase II regulatory region sequence-specific DNA binding;MF:DNA binding;	K09260	MEF2A	map04013;map04022;map05418	MAPK signaling pathway - fly;cGMP-PKG signaling pathway;Fluid shear stress and atherosclerosis	COG5068	S:Function unknown	sp|P40791|MEF2_DROME;	Myocyte-specific enhancer factor 2 OS=Drosophila melanogaster OX=7227 GN=Mef2 PE=1 SV=3;	PF00319;PF12347	SRF-TF;HJURP_C	SRF-type transcription factor;Holliday junction regulator protein family C-terminal repeat
TRINITY_DN20358_c1_g1	-2.05274	9.18643e-06	0.000100791	down	2.77924	0.000842348	0.00412347	up	hypothetical protein YQE_12106, partial [Dendroctonus ponderosae]	75.86	------	------	------	------	------	------	------	------	------	------	------	------	------
TRINITY_DN20378_c1_g2	4.90217	3.48916e-07	5.93891e-06	up	6.67396	5.70764e-07	7.36221e-06	up		0.07	------	------	------	------	------	------	------	------	------	------	------	------	------
TRINITY_DN20380_c0_g1	-1.43529	4.38719e-05	0.000380676	down	-2.08561	7.84151e-14	4.40066e-12	down	PREDICTED: importin subunit alpha-3 [Dendroctonus ponderosae] >ENN73005.1 hypothetical protein YQE_10340, partial [Dendroctonus ponderosae] >ERL88700.1 hypothetical protein D910_06082 [Dendroctonus ponderosae]	92.38	GO:0006606;GO:0005737;GO:0005634;GO:0061608	BP:protein import into nucleus;CC:cytoplasm;CC:nucleus;MF:nuclear import signal receptor activity;	------	------	------	------	COG5064	U:Intracellular trafficking, secretion, and vesicular transport	sp|O35344|IMA4_MOUSE;	Importin subunit alpha-4 OS=Mus musculus OX=10090 GN=Kpna3 PE=1 SV=1;	PF00514;PF13513;PF13646;PF02985;PF01749;PF01602	Arm;HEAT_EZ;HEAT_2;HEAT;IBB;Adaptin_N	Armadillo/beta-catenin-like repeat;HEAT-like repeat;HEAT repeats;HEAT repeat;Importin beta binding domain;Adaptin N terminal region
TRINITY_DN20380_c0_g3	1.5978	0.00173647	0.00819127	up	1.85338	0.00188878	0.00812486	up		51.64	------	------	------	------	------	------	------	------	------	------	------	------	------
TRINITY_DN20381_c0_g1	2.52921	0.00190898	0.00886219	up	3.61913	2.10854e-06	2.33218e-05	up	hypothetical protein D910_05300 [Dendroctonus ponderosae]	2.09	GO:0051123;GO:0006357;GO:0006367;GO:0016021;GO:0005669;GO:0044212;GO:0003713;GO:0035035;GO:0008134;GO:0003743	BP:RNA polymerase II transcriptional preinitiation complex assembly;BP:regulation of transcription from RNA polymerase II promoter;BP:transcription initiation from RNA polymerase II promoter;CC:integral component of membrane;CC:transcription factor TFIID complex;MF:transcription regulatory region DNA binding;MF:transcription coactivator activity;MF:histone acetyltransferase binding;MF:transcripti…	K03132	TAF7	map03022	Basal transcription factors	COG5414	K:Transcription	------	------	PF04658	TAFII55_N	TAFII55 protein conserved region
TRINITY_DN20385_c0_g1	3.16008	2.37252e-08	5.80592e-07	up	2.90325	0.000266712	0.00154972	up		1.06	------	------	------	------	------	------	------	------	------	------	------	------	------
TRINITY_DN20413_c0_g6	-3.3206	3.30253e-08	7.71132e-07	down	-4.282	2.96378e-12	1.26893e-10	down	PREDICTED: rho guanine nucleotide exchange factor 12 isoform X2 [Dendroctonus ponderosae]	7.51	GO:0035556;GO:0005737;GO:0005089	BP:intracellular signal transduction;CC:cytoplasm;MF:Rho guanyl-nucleotide exchange factor activity;	------	------	------	------	ENOG411079M;COG5422	T:Signal transduction mechanisms;	sp|Q8R4H2|ARHGC_MOUSE;	Rho guanine nucleotide exchange factor 12 OS=Mus musculus OX=10090 GN=Arhgef12 PE=1 SV=2;	PF09128;PF17820;PF00595;PF00130;PF13180;PF00615	RGS-like;PDZ_6;PDZ;C1_1;PDZ_2;RGS	Regulator of G protein signalling-like domain;PDZ domain;PDZ domain;Phorbol esters/diacylglycerol binding domain;PDZ domain;Regulator of G protein signaling domain
TRINITY_DN20414_c0_g7	-5.78543	1.84446e-21	5.39719e-19	down	-6.0356	1.56629e-08	3.01028e-07	down	hypothetical protein YQE_04256, partial [Dendroctonus ponderosae]	81.34	GO:0004252	MF:serine-type endopeptidase activity;	------	------	------	------	COG5640	O:Posttranslational modification, protein turnover, chaperones	sp|P00765|TRYP_ASTAS;	Trypsin-1 OS=Astacus astacus OX=6715 PE=1 SV=1;	PF00089;PF13365	Trypsin;Trypsin_2	Trypsin;Trypsin-like peptidase domain
TRINITY_DN20419_c4_g1	-4.48118	1.26678e-10	5.31971e-09	down	-2.24354	0.00115152	0.00538805	down	PREDICTED: actin cytoskeleton-regulatory complex protein PAN1 [Dendroctonus ponderosae]	121.26	GO:0042302	MF:structural constituent of cuticle;	------	------	------	------	ENOG4111QXK	S:Function unknown	------	------	PF00379	Chitin_bind_4	Insect cuticle protein
TRINITY_DN20449_c2_g2	-2.59035	0.000217085	0.00146315	down	-2.57166	0.00111881	0.00525656	down	PREDICTED: 2-oxoisovalerate dehydrogenase subunit alpha, mitochondrial [Dendroctonus ponderosae]	3.1	GO:0009083;GO:0005947;GO:0003863;GO:0003826	BP:branched-chain amino acid catabolic process;CC:mitochondrial alpha-ketoglutarate dehydrogenase complex;MF:3-methyl-2-oxobutanoate dehydrogenas;MF:alpha-ketoacid dehydrogenase activity;	K00166	BCKDHA, bkdA1	map00280;map00640	Valine, leucine and isoleucine degradation;Propanoate metabolism	COG1071	U:Intracellular trafficking, secretion, and vesicular transport	sp|Q8HXY4|ODBA_MACFA;	2-oxoisovalerate dehydrogenase subunit alpha, mitochondrial OS=Macaca fascicularis OX=9541 GN=BCKDHA PE=2 SV=1;	PF00676;PF02775;PF00456	E1_dh;TPP_enzyme_C;Transketolase_N	Dehydrogenase E1 component;Thiamine pyrophosphate enzyme, C-terminal TPP binding domain;Transketolase, thiamine diphosphate binding domain
TRINITY_DN20453_c0_g1	2.17139	0.00131622	0.00652677	up	2.80373	0.000751591	0.00374952	up	PREDICTED: G kinase-anchoring protein 1-like [Dendroctonus ponderosae] >ENN81967.1 hypothetical protein YQE_01678, partial [Dendroctonus ponderosae] >ERL87655.1 hypothetical protein D910_05046 [Dendroctonus ponderosae]	4.17	GO:0007165;GO:0005794	BP:signal transduction;CC:Golgi apparatus;	------	------	------	------	ENOG410YKPT	S:Function unknown	sp|Q8AVX1|GKP1B_XENLA;	G kinase-anchoring protein 1-B OS=Xenopus laevis OX=8355 GN=gkap1-b PE=2 SV=1;	------	------	------
TRINITY_DN20463_c0_g1	-3.74033	1.90106e-11	9.66553e-10	down	-7.83654	2.31252e-16	2.16298e-14	down	unknown [Dendroctonus ponderosae]	35.21	GO:0005975;GO:0016021;GO:0008422;GO:0004553	BP:carbohydrate metabolic process;CC:integral component of membrane;MF:beta-glucosidase activity;MF:hydrolase activity, hydrolyzing O-glycosyl compounds;	------	------	------	------	COG2723	G:Carbohydrate transport and metabolism	sp|Q95X01|MYRO1_BREBR;	Myrosinase 1 OS=Brevicoryne brassicae OX=69196 PE=1 SV=1;	PF00232	Glyco_hydro_1	Glycosyl hydrolase family 1
TRINITY_DN20490_c0_g1	-2.68241	0.00108438	0.00556576	down	6.45855	5.64842e-07	7.29614e-06	up	PREDICTED: uncharacterized protein LOC109539772 [Dendroctonus ponderosae]	1.91	------	------	------	------	------	------	ENOG41128DE	S:Function unknown	------	------	------	------	------
TRINITY_DN20500_c0_g1	-4.52299	1.19589e-06	1.73584e-05	down	-3.63733	0.00178171	0.00771892	down	hypothetical protein YQE_04831, partial [Dendroctonus ponderosae]	17.99	GO:0006633;GO:0006030;GO:0005576;GO:0016021;GO:0016717;GO:0032977;GO:0008061	BP:fatty acid biosynthetic process;BP:chitin metabolic process;CC:extracellular region;CC:integral component of membrane;MF:oxidoreductase activity, acting on paired donors, with oxidation of a pair of donors resulting in the reduction of molecular oxygen to two molecules of water;MF:membrane insertase activity;MF:chitin binding;	------	------	------	------	------	------	sp|O76217|PE1_ANOGA;	Peritrophin-1 OS=Anopheles gambiae OX=7165 GN=Aper1 PE=2 SV=2;	PF01607	CBM_14	Chitin binding Peritrophin-A domain
TRINITY_DN20539_c1_g1	-2.29959	2.14007e-08	5.32713e-07	down	-2.08298	8.0967e-07	9.9579e-06	down	PREDICTED: cytochrome c oxidase subunit 4 isoform 1, mitochondrial [Dendroctonus ponderosae] >AEE62643.1 unknown [Dendroctonus ponderosae] >ENN78519.1 hypothetical protein YQE_05012, partial [Dendroctonus ponderosae] >ERL87445.1 hypothetical protein D910_04837 [Dendroctonus ponderosae]	642.98	GO:0006123;GO:0005751;GO:0016021;GO:0004129	BP:mitochondrial electron transport, cytochrome c to oxygen;CC:mitochondrial respiratory chain complex IV;CC:integral component of membrane;MF:cytochrome-c oxidase activity;	K02263	COX4	map04932;map04260;map05012;map05010;map05016;map00190	Non-alcoholic fatty liver diseas;Cardiac muscle contraction;Parkinson's disease;Alzheimer's disease;Huntington's disease;Oxidative phosphorylation	ENOG4111T97	O:Posttranslational modification, protein turnover, chaperones	sp|O46586|COX41_PERPO;	Cytochrome c oxidase subunit 4 isoform 1, mitochondrial;	PF02936	COX4	Cytochrome c oxidase subunit IV
TRINITY_DN20553_c0_g1	-2.90594	6.35613e-05	0.000518481	down	-6.26554	9.35282e-08	1.47822e-06	down	PREDICTED: apyrase [Dendroctonus ponderosae] >AEE63459.1 unknown [Dendroctonus ponderosae]	27.05	GO:0009166;GO:0006196;GO:0005886;GO:0008253;GO:0016788;GO:0000166;GO:0046872	BP:nucleotide catabolic process;BP:AMP catabolic process;CC:plasma membrane;MF:5'-nucleotidase activity;MF:hydrolase activity, acting on ester bonds;MF:nucleotide binding;MF:metal ion binding;	K19970	NT5E, CD73	map00240;map00230;map00760	Pyrimidine metabolism;Purine metabolism;Nicotinate and nicotinamide metabolism	COG0737	F:Nucleotide transport and metabolism	sp|B3A0N5|APY_TABYA;	Apyrase OS=Tabanus yao OX=485572 PE=1 SV=1;	PF02872	5_nucleotid_C	5'-nucleotidase, C-terminal domain
TRINITY_DN20556_c0_g4	-1.70025	3.39699e-05	0.00030736	down	6.78248	1.17707e-11	4.45408e-10	up		117.48	------	------	------	------	------	------	------	------	------	------	------	------	------
TRINITY_DN20565_c2_g2	2.0343	0.000477256	0.00283284	up	-1.83969	0.000119819	0.00077966	down	hypothetical protein D910_08593 [Dendroctonus ponderosae]	3.14	GO:0016021;GO:0016757	CC:integral component of membrane;MF:transferase activity, transferring glycosyl groups;	K21032	B4GAT1	map00515	Mannose type O-glycan biosynthesis	ENOG410XRNY	G:Carbohydrate transport and metabolism	sp|L7YAI7|B4GA1_DANRE;	Beta-1,4-glucuronyltransferase 1 OS=Danio rerio OX=7955 GN=b4gat1 PE=2 SV=1;	PF13896	Glyco_transf_49	Glycosyl-transferase for dystroglycan
TRINITY_DN20572_c1_g1	-2.59125	0.000106059	0.000802544	down	4.16613	0.00195228	0.00836252	up		7.34	------	------	------	------	------	------	------	------	------	------	------	------	------
TRINITY_DN20612_c2_g1	-2.5985	0.000406397	0.00247747	down	2.77159	7.74803e-06	7.36023e-05	up	hypothetical protein YQE_00362, partial [Dendroctonus ponderosae]	80.73	------	------	------	------	------	------	------	------	------	------	------	------	------
TRINITY_DN20612_c2_g2	3.61095	0.000113748	0.000850897	up	9.03242	1.77017e-05	0.000149417	up		0.09	------	------	------	------	------	------	------	------	------	------	------	------	------
TRINITY_DN20617_c0_g1	2.36582	0.00020652	0.00140157	up	2.16233	0.000301996	0.00172993	up		12.88	------	------	------	------	------	------	------	------	------	------	------	------	------
TRINITY_DN20638_c0_g3	1.5847	0.000154523	0.00110197	up	2.1286	2.62662e-07	3.69083e-06	up	unknown [Dendroctonus ponderosae]	5.27	GO:0006906;GO:0048278;GO:0006886;GO:0006412;GO:0016192;GO:0015935;GO:0000421;GO:0016021;GO:0031201;GO:0012505;GO:0003735;GO:0000149;GO:0005484	BP:vesicle fusion;BP:vesicle docking;BP:intracellular protein transport;BP:translation;BP:vesicle-mediated transport;CC:small ribosomal subunit;CC:autophagosome membrane;CC:integral component of membrane;CC:SNARE complex;CC:endomembrane system;MF:structural constituent of ribosome;MF:SNARE binding;MF:SNAP receptor activity;	K08491	STX17	map04130;map04140	SNARE interactions in vesicular transport;Autophagy - animal	COG5325	U:Intracellular trafficking, secretion, and vesicular transport	------	------	------	------	------
TRINITY_DN20643_c0_g1	-3.913	7.13425e-14	6.03799e-12	down	-7.04909	3.35042e-08	5.89314e-07	down	PREDICTED: venom serine carboxypeptidase-like [Dendroctonus ponderosae] >ENN73573.1 hypothetical protein YQE_09821, partial [Dendroctonus ponderosae] >ERL89488.1 hypothetical protein D910_06854 [Dendroctonus ponderosae]	56.11	GO:0051603;GO:0004185	BP:proteolysis involved in cellular protein catabolic process;MF:serine-type carboxypeptidase activity;	K09645	CPVL	------	------	COG2939	E:Amino acid transport and metabolism	sp|C9WMM5|VCP_APIME;	Venom serine carboxypeptidase OS=Apis mellifera OX=7460 PE=2 SV=1;	PF00450	Peptidase_S10	Serine carboxypeptidase
TRINITY_DN20646_c0_g1	-6.87984	1.12552e-06	1.64498e-05	down	-6.33485	0.000159594	0.000997888	down		7.97	------	------	------	------	------	------	------	------	------	------	------	------	------
TRINITY_DN20653_c2_g3	-2.84528	8.3951e-05	0.000656197	down	-4.41412	0.000240903	0.00142626	down	unknown [Dendroctonus ponderosae] >ERL91264.1 hypothetical protein D910_08598 [Dendroctonus ponderosae]	110.6	GO:0016021;GO:0003993	CC:integral component of membrane;MF:acid phosphatase activity;	K19283	ACPP	------	------	ENOG410ZVBQ	S:Function unknown	sp|Q5BLY5|ACPH1_APIME;	Venom acid phosphatase Acph-1 OS=Apis mellifera OX=7460 PE=1 SV=1;	PF00328	His_Phos_2	Histidine phosphatase superfamily
TRINITY_DN20658_c0_g1	-3.24242	6.66021e-11	2.97201e-09	down	-2.21717	5.38364e-10	1.40677e-08	down	PREDICTED: N-acetylneuraminate lyase-like [Dendroctonus ponderosae]	15.97	GO:0016829	MF:lyase activity;	K01639	E4.1.3.3, nanA, NPL	map00520	Amino sugar and nucleotide sugar metabolism	COG0329	E:Amino acid transport and metabolism	sp|Q9DCJ9|NPL_MOUSE;	N-acetylneuraminate lyase OS=Mus musculus OX=10090 GN=Npl PE=1 SV=1;	PF00701	DHDPS	Dihydrodipicolinate synthetase family
TRINITY_DN20664_c0_g1	3.51538	0.00158819	0.00760662	up	3.69506	0.000855819	0.00417919	up		0.16	------	------	------	------	------	------	------	------	------	------	------	------	------
TRINITY_DN20684_c1_g2	-2.16258	0.000104418	0.000792746	down	-2.77661	4.42423e-12	1.82564e-10	down	hypothetical protein YQE_08534, partial [Dendroctonus ponderosae]	5.3	GO:0045454;GO:0016021;GO:0005623;GO:0016853	BP:cell redox homeostasis;CC:integral component of membrane;CC:cell;MF:isomerase activity;	K09583;K01829	PDIA5;E5.3.4.1	------	------	COG0526	O:Posttranslational modification, protein turnover, chaperones	sp|Q2KIL5|PDIA5_BOVIN;	Protein disulfide-isomerase A5 OS=Bos taurus OX=9913 GN=PDIA5 PE=2 SV=1;	PF00085;PF13098;PF13899;PF00578	Thioredoxin;Thioredoxin_2;Thioredoxin_7;AhpC-TSA	Thioredoxin;Thioredoxin-like domain;Thioredoxin-like;AhpC/TSA family
TRINITY_DN20685_c0_g1	-6.9945	1.17622e-07	2.32853e-06	down	-4.77183	3.98381e-16	3.52722e-14	down	PREDICTED: uncharacterized protein LOC109533612 [Dendroctonus ponderosae] >ENN80489.1 hypothetical protein YQE_03093, partial [Dendroctonus ponderosae] >ERL88447.1 hypothetical protein D910_05833 [Dendroctonus ponderosae]	88.8	GO:0042302	MF:structural constituent of cuticle;	------	------	------	------	ENOG4112DDP;ENOG41125JG	S:Function unknown;	sp|P82119|CUO6_BLACR;	Cuticle protein 6 OS=Blaberus craniifer OX=6982 PE=1 SV=1;	PF00379	Chitin_bind_4	Insect cuticle protein
TRINITY_DN20693_c0_g1	-4.36966	7.67869e-20	1.85272e-17	down	-6.30154	2.45047e-06	2.65878e-05	down	unknown [Dendroctonus ponderosae]	32.02	GO:0005975;GO:0004553	BP:carbohydrate metabolic process;MF:hydrolase activity, hydrolyzing O-glycosyl compounds;	------	------	------	------	COG2723	G:Carbohydrate transport and metabolism	sp|Q95X01|MYRO1_BREBR;	Myrosinase 1 OS=Brevicoryne brassicae OX=69196 PE=1 SV=1;	PF00232;PF00150	Glyco_hydro_1;Cellulase	Glycosyl hydrolase family 1;Cellulase
TRINITY_DN20702_c2_g6	2.6592	1.81284e-07	3.38519e-06	up	2.83479	7.15749e-08	1.15732e-06	up		2.06	------	------	------	------	------	------	------	------	------	------	------	------	------
TRINITY_DN20720_c0_g1	-2.1332	8.1007e-07	1.24202e-05	down	1.66731	6.30164e-05	0.000448355	up	PREDICTED: sorting nexin-17 [Dendroctonus ponderosae] >ENN74125.1 hypothetical protein YQE_09098, partial [Dendroctonus ponderosae] >ERL94256.1 hypothetical protein D910_11537 [Dendroctonus ponderosae]	15.25	GO:0006886;GO:1990126;GO:0007165;GO:0005623;GO:0005769;GO:0035091	BP:intracellular protein transport;BP:retrograde transport, endosome to plasma membrane;BP:signal transduction;CC:cell;CC:early endosome;MF:phosphatidylinositol binding;	K17929	SNX17	------	------	ENOG410XT9I	U:Intracellular trafficking, secretion, and vesicular transport	sp|Q5RID7|SNX17_DANRE;	Sorting nexin-17 OS=Danio rerio OX=7955 GN=snx17 PE=2 SV=1;	PF18116;PF00787;PF00373	SNX17_FERM_C;PX;FERM_M	Sorting Nexin 17 FERM C-terminal domain;PX domain;FERM central domain
TRINITY_DN20727_c0_g3	1.35691	0.00129526	0.00644721	up	5.73127	2.14386e-20	3.68886e-18	up		3.81	------	------	------	------	------	------	------	------	------	------	------	------	------
TRINITY_DN20736_c0_g1	-2.45633	0.000184453	0.00127734	down	-3.89713	1.05293e-19	1.63229e-17	down	hypothetical protein D910_06671 [Dendroctonus ponderosae]	21.41	GO:0000226;GO:0008017	BP:microtubule cytoskeleton organization;MF:microtubule binding;	K18595	EML1_2	------	------	ENOG411275Q;COG2319;COG2801;ENOG410XNTQ	S:Function unknown;L:Replication, recombination and repair;S:Function unknown	------	------	------	------	------
TRINITY_DN20736_c0_g2	1.70658	0.000375317	0.00231486	up	-1.49001	0.000623908	0.0032091	down	PREDICTED: nucleoporin Nup37 [Dendroctonus ponderosae] >ENN79592.1 hypothetical protein YQE_03963, partial [Dendroctonus ponderosae] >ERL89300.1 hypothetical protein D910_06672 [Dendroctonus ponderosae]	7.36	GO:0031080	CC:nuclear pore outer ring;	K14302	NUP37	map03013	RNA transport	ENOG410XSZQ;ENOG410XP3K	U:Intracellular trafficking, secretion, and vesicular transport;	sp|Q9CWU9|NUP37_MOUSE;	Nucleoporin Nup37 OS=Mus musculus OX=10090 GN=Nup37 PE=1 SV=2;	PF00400;PF12894	WD40;ANAPC4_WD40	WD domain, G-beta repeat;Anaphase-promoting complex subunit 4 WD40 domain
TRINITY_DN20769_c3_g1	2.50402	8.26356e-05	0.000648811	up	3.67228	0.00018608	0.00114004	up	PREDICTED: uncharacterized protein LOC109537517 [Dendroctonus ponderosae] >XP_019759852.1 PREDICTED: uncharacterized protein LOC109537517 [Dendroctonus ponderosae] >ENN77235.1 hypothetical protein YQE_06065, partial [Dendroctonus ponderosae]	3.61	GO:0006281;GO:0004519	BP:DNA repair;MF:endonuclease activity;	K20773	RBBP8, CTIP	map03440	Homologous recombination	------	------	------	------	------	------	------
TRINITY_DN20773_c0_g3	-9.61871	7.11753e-56	4.89437e-52	down	-6.8547	1.14219e-07	1.76248e-06	down	PREDICTED: uncharacterized protein LOC109534789 [Dendroctonus ponderosae] >ENN79566.1 hypothetical protein YQE_04028, partial [Dendroctonus ponderosae]	1007.87	------	------	------	------	------	------	ENOG410YVIA	S:Function unknown	------	------	PF16984	Grp7_allergen	Group 7 allergen
TRINITY_DN20776_c0_g1	-3.83804	1.94104e-08	4.88922e-07	down	-5.87152	7.84661e-09	1.63559e-07	down	PREDICTED: uncharacterized protein LOC109541619 [Dendroctonus ponderosae] >XP_019766057.1 PREDICTED: uncharacterized protein LOC109541619 [Dendroctonus ponderosae] >ENN73718.1 hypothetical protein YQE_09688, partial [Dendroctonus ponderosae]	3.94	GO:0005975;GO:0005737;GO:0016021;GO:0004564;GO:0004553	BP:carbohydrate metabolic process;CC:cytoplasm;CC:integral component of membrane;MF:beta-fructofuranosidase activity;MF:hydrolase activity, hydrolyzing O-glycosyl compounds;	K01193	INV, sacA	map00500;map00052	Starch and sucrose metabolism;Galactose metabolism	COG1621	G:Carbohydrate transport and metabolism	sp|P40714|CSCA_ECOLX;	Sucrose-6-phosphate hydrolase OS=Escherichia coli OX=562 GN=cscA PE=3 SV=1;	PF00251;PF08244	Glyco_hydro_32N;Glyco_hydro_32C	Glycosyl hydrolases family 32 N-terminal domain;Glycosyl hydrolases family 32 C terminal
TRINITY_DN20782_c0_g1	1.53145	0.00181754	0.00850662	up	-1.3653	4.89989e-07	6.43869e-06	down	PREDICTED: sorting nexin-6 isoform X2 [Dendroctonus ponderosae]	16.7	GO:0015031;GO:0090389;GO:0035091	BP:protein transport;BP:phagosome-lysosome fusion involved in apoptotic cell clearance;MF:phosphatidylinositol binding;	K17920	SNX5_6_32	map04144	Endocytosis	ENOG410XPZY	U:Intracellular trafficking, secretion, and vesicular transport	sp|Q5R613|SNX6_PONAB;	Sorting nexin-6 OS=Pongo abelii OX=9601 GN=SNX6 PE=2 SV=1;	PF00787	PX	PX domain
TRINITY_DN20808_c1_g7	1.42935	0.000407713	0.0024844	up	2.40586	2.96017e-13	1.53382e-11	up		9.79	------	------	------	------	------	------	------	------	------	------	------	------	------
TRINITY_DN20811_c1_g4	-2.88082	8.20091e-08	1.69477e-06	down	-2.91389	9.6761e-06	8.90875e-05	down	PREDICTED: perlucin-like [Dendroctonus ponderosae] >ENN76497.1 hypothetical protein YQE_06949, partial [Dendroctonus ponderosae]	44.88	------	------	------	------	------	------	ENOG410ZCC2;ENOG410XPJ1	S:Function unknown;	sp|P82596|PLC_HALLA;	Perlucin OS=Haliotis laevigata OX=36097 PE=1 SV=3;	PF00059	Lectin_C	Lectin C-type domain
TRINITY_DN20829_c0_g1	6.0561	2.55631e-20	6.69656e-18	up	-5.3054	2.15911e-07	3.10079e-06	down	PREDICTED: chitooligosaccharidolytic beta-N-acetylglucosaminidase-like [Dendroctonus ponderosae] >XP_019768087.1 PREDICTED: chitooligosaccharidolytic beta-N-acetylglucosaminidase-like [Dendroctonus ponderosae] >AEE61398.1 unknown [Dendroctonus ponderosae]	0.23	GO:0005975;GO:0004563;GO:0102148	BP:carbohydrate metabolic process;MF:beta-N-acetylhexosaminidase activity;MF:N-acetyl-beta-D-galactosaminidase activity;	K12373	HEXA_B	map00520;map00603;map00604;map00511;map00531;map04142	Amino sugar and nucleotide sugar metabolism;Glycosphingolipid biosynthesis - globo and isoglobo series;Glycosphingolipid biosynthesis - ganglio series;Other glycan degradation;Glycosaminoglycan degradation;Lysosome	COG3525	G:Carbohydrate transport and metabolism	sp|P49010|HEXC_BOMMO;	Chitooligosaccharidolytic beta-N-acetylglucosaminidase OS=Bombyx mori OX=7091 PE=1 SV=1;	PF00728;PF14845	Glyco_hydro_20;Glycohydro_20b2	Glycosyl hydrolase family 20, catalytic domain;beta-acetyl hexosaminidase like
TRINITY_DN20834_c1_g3	-2.3968	1.14139e-05	0.00012117	down	-3.86651	0.000142286	0.000901719	down	hypothetical protein D910_12181 [Dendroctonus ponderosae]	73.05	GO:0005975;GO:0030246;GO:0004553	BP:carbohydrate metabolic process;MF:carbohydrate binding;MF:hydrolase activity, hydrolyzing O-glycosyl compounds;	K05546	GANAB	map00510;map04141	N-Glycan biosynthesis;Protein processing in endoplasmic reticulum	COG1501	G:Carbohydrate transport and metabolism	sp|Q8TET4|GANC_HUMAN;	Neutral alpha-glucosidase C OS=Homo sapiens OX=9606 GN=GANC PE=2 SV=3;	PF01055;PF13802;PF17137	Glyco_hydro_31;Gal_mutarotas_2;DUF5110	Glycosyl hydrolases family 31;Galactose mutarotase-like;Domain of unknown function
TRINITY_DN20834_c1_g5	-3.04159	0.000144076	0.00103906	down	4.1352	0.00119506	0.00555048	up	PREDICTED: protein takeout-like isoform X1 [Dendroctonus ponderosae] >AEE61600.1 unknown [Dendroctonus ponderosae]	17.47	GO:0042545;GO:0030599;GO:0045330	BP:cell wall modification;MF:pectinesterase activity;MF:aspartyl esterase activity;	------	------	------	------	ENOG410ZN8I;ENOG4111QHV;ENOG410ZMTI	S:Function unknown;	sp|Q9VBV3|TAKT_DROME;	Protein takeout OS=Drosophila melanogaster OX=7227 GN=to PE=2 SV=1;	PF06585	JHBP	Haemolymph juvenile hormone binding protein
TRINITY_DN20843_c0_g1	-4.33022	4.79137e-14	4.22408e-12	down	-2.27027	1.06294e-06	1.2721e-05	down	hypothetical protein YQE_05314, partial [Dendroctonus ponderosae] >ERL92445.1 hypothetical protein D910_09759 [Dendroctonus ponderosae]	7.77	GO:0006355;GO:0006357;GO:0045944;GO:0005737;GO:0005634;GO:0005667;GO:0003700;GO:0003677;GO:0046983;GO:0000981	BP:regulation of transcription, DNA-templated;BP:regulation of transcription from RNA polymerase II promoter;BP:positive regulation of transcription from RNA polymerase II promoter;CC:cytoplasm;CC:nucleus;CC:transcription factor complex;MF:transcription factor activity, sequence-specific DNA binding;MF:DNA binding;MF:protein dimerization activity;MF:RNA polymerase II transcription factor activity…	K08268	HIF1A	map05205;map05211;map05200;map04659;map04919;map04212;map05230;map05231;map04066;map04140	Proteoglycans in cancer;Renal cell carcinoma;Pathways in cancer;Th17 cell differentiation;Thyroid hormone signaling pathway;Longevity regulating pathway - worm;Central carbon metabolism in cancer;Choline metabolism in cancer;HIF-1 signaling pathway;Autophagy - animal	ENOG410YK57	K:Transcription	sp|Q16665|HIF1A_HUMAN;	Hypoxia-inducible factor 1-alpha OS=Homo sapiens OX=9606 GN=HIF1A PE=1 SV=1;	PF08447;PF14598;PF00989;PF13426;PF08448	PAS_3;PAS_11;PAS;PAS_9;PAS_4	PAS fold;PAS domain;PAS fold;PAS domain;PAS fold
TRINITY_DN20866_c0_g8	-1.69543	7.62529e-05	0.000605838	down	4.27411	3.97325e-07	5.38796e-06	up	piggyBac transposable element-derived protein 3-like [Diaphorina citri]	6.02	GO:0033141;GO:0002230;GO:0010628;GO:0045739;GO:0016604;GO:0005634;GO:0005654;GO:0043565	BP:positive regulation of peptidyl-serine phosphorylation of STAT protein;BP:positive regulation of defense response to virus by host;BP:positive regulation of gene expression;BP:positive regulation of DNA repair;CC:nuclear body;CC:nucleus;CC:nucleoplasm;MF:sequence-specific DNA binding;	K10841	ERCC6, CSB, RAD26	map03420	Nucleotide excision repair	ENOG410ZDPG	S:Function unknown	sp|P0DP91|ERPG3_HUMAN;	Chimeric ERCC6-PGBD3 protein OS=Homo sapiens OX=9606 GN=CSB-PGBD3 PE=1 SV=1;	PF13843	DDE_Tnp_1_7	Transposase IS4
TRINITY_DN20868_c0_g1	-2.46018	1.15339e-08	3.04463e-07	down	-2.12169	0.000634821	0.00325971	down	PREDICTED: protein ABHD16A-like [Dendroctonus ponderosae]	28.95	GO:0016021;GO:0016787	CC:integral component of membrane;MF:hydrolase activity;	------	------	------	------	ENOG410XQU4;COG1073	S:Function unknown;	sp|Q1JPD2|ABHGA_BOVIN;	Phosphatidylserine lipase ABHD16A OS=Bos taurus OX=9913 GN=ABHD16A PE=2 SV=1;	PF00561;PF12146	Abhydrolase_1;Hydrolase_4	alpha/beta hydrolase fold;Serine aminopeptidase, S33
TRINITY_DN20889_c0_g1	-1.70034	0.00132319	0.00655117	down	-1.44065	3.95985e-05	0.000298568	down	PREDICTED: uncharacterized protein LOC109533325 [Dendroctonus ponderosae] >AEE61705.1 unknown [Dendroctonus ponderosae] >ENN80722.1 hypothetical protein YQE_02858, partial [Dendroctonus ponderosae]	33.33	GO:0016021	CC:integral component of membrane;	------	------	------	------	------	------	------	------	------	------	------
TRINITY_DN20891_c2_g4	1.48735	4.36938e-05	0.000379369	up	-1.61264	4.32215e-05	0.000322552	down	PREDICTED: probable splicing factor, arginine/serine-rich 7 [Dendroctonus ponderosae] >ENN72752.1 hypothetical protein YQE_10557, partial [Dendroctonus ponderosae]	13.4	GO:0000381;GO:0005654;GO:0003723	BP:regulation of alternative mRNA splicing, via spliceosome;CC:nucleoplasm;MF:RNA binding;	K13165	SFRS12	------	------	ENOG410YYIR	S:Function unknown	sp|O01159|RSP7_CAEEL;	Probable splicing factor, arginine/serine-rich 7 OS=Caenorhabditis elegans OX=6239 GN=rsp-7 PE=3 SV=3;	PF00076	RRM_1	RNA recognition motif.
TRINITY_DN20894_c0_g1	-2.09858	1.17486e-05	0.000124195	down	4.38171	2.11969e-07	3.0538e-06	up	PREDICTED: putative leucine-rich repeat-containing protein DDB_G0290503 isoform X3 [Dendroctonus ponderosae]	19.25	GO:0010506;GO:0005615	BP:regulation of autophagy;CC:extracellular space;	------	------	------	------	ENOG410XUHJ	S:Function unknown	------	------	PF11365	SOGA	Protein SOGA
TRINITY_DN20899_c0_g1	-4.07684	2.75452e-07	4.83509e-06	down	1.88053	5.88144e-06	5.74875e-05	up	PREDICTED: protein artichoke-like [Dendroctonus ponderosae]	6.3	------	------	------	------	------	------	COG4886	S:Function unknown	------	------	PF13855;PF13306;PF12799;PF14580	LRR_8;LRR_5;LRR_4;LRR_9	Leucine rich repeat;BspA type Leucine rich repeat region;Leucine Rich repeats;Leucine-rich repeat
TRINITY_DN20903_c0_g1	-4.63346	3.69447e-08	8.50377e-07	down	-4.7801	0.00229056	0.00953173	down	PREDICTED: UDP-glucuronosyltransferase 1-8-like [Dendroctonus ponderosae] >AEE62019.1 unknown [Dendroctonus ponderosae] >ENN79807.1 hypothetical protein YQE_03748, partial [Dendroctonus ponderosae] >ERL88065.1 hypothetical protein D910_05454 [Dendroctonus ponderosae]	6.98	GO:0016021;GO:0043231;GO:0015020;GO:0016740;GO:0008194	CC:integral component of membrane;CC:intracellular membrane-bounded organelle;MF:glucuronosyltransferase activity;MF:transferase activity;MF:UDP-glycosyltransferase activity;	K00699	UGT	map05204;map00983;map00982;map00980;map00040;map00860;map00053;map00830;map00140	Chemical carcinogenesis;Drug metabolism - other enzymes;Drug metabolism - cytochrome P450;Metabolism of xenobiotics by cytochrome P450;Pentose and glucuronate interconversions;Porphyrin and chlorophyll metabolism;Ascorbate and aldarate metabolism;Retinol metabolism;Steroid hormone biosynthesis	COG1819	S:Function unknown	sp|P06133|UD2B4_HUMAN;	UDP-glucuronosyltransferase 2B4 OS=Homo sapiens OX=9606 GN=UGT2B4 PE=1 SV=2;	PF00201;PF04101	UDPGT;Glyco_tran_28_C	UDP-glucoronosyl and UDP-glucosyl transferase;Glycosyltransferase family 28 C-terminal domain
TRINITY_DN20907_c0_g2	2.80504	9.25098e-08	1.89329e-06	up	3.84096	1.36958e-07	2.06615e-06	up		2.53	------	------	------	------	------	------	------	------	------	------	------	------	------
TRINITY_DN20935_c0_g1	1.40731	0.000112889	0.000845392	up	-2.11486	4.52501e-13	2.24882e-11	down	hypothetical protein D910_04541 [Dendroctonus ponderosae]	29.08	GO:0072334;GO:0055085;GO:0005856;GO:0005794;GO:0030176;GO:0016021;GO:0030173;GO:0003779;GO:0005460;GO:0022857;GO:0005459	BP:UDP-galactose transmembrane transport;BP:transmembrane transport;CC:cytoskeleton;CC:Golgi apparatus;CC:integral component of endoplasmic reticulum membrane;CC:integral component of membrane;CC:integral component of Golgi membrane;MF:actin binding;MF:UDP-glucose transmembrane transporter activity;MF:transmembrane transporter activity;MF:UDP-galactose transmembrane transporter activity;	K15275	SLC35B1	------	------	COG0697;COG0697	E:Amino acid transport and metabolism;G:Carbohydrate transport and metabolism	sp|Q9VDD7|S35B1_DROME;	Solute carrier family 35 member B1 homolog OS=Drosophila melanogaster OX=7227 GN=meigo PE=2 SV=1;	PF08449;PF00892;PF03151	UAA;EamA;TPT	UAA transporter family;EamA-like transporter family;Triose-phosphate Transporter family
TRINITY_DN20954_c0_g1	-2.91738	1.60376e-05	0.000161882	down	3.82262	0.000130369	0.000834317	up	hypothetical protein D910_12274 [Dendroctonus ponderosae]	1.67	GO:0007165	BP:signal transduction;	------	------	------	------	ENOG4111FHJ	S:Function unknown	------	------	------	------	------
TRINITY_DN20972_c0_g2	1.502	0.00134121	0.00662163	up	-1.83494	1.5456e-14	1.04023e-12	down	PREDICTED: LOW QUALITY PROTEIN: protein FAM114A2-like [Dendroctonus ponderosae]	8.24	------	------	------	------	------	------	ENOG411029H	S:Function unknown	sp|Q8VE88|F1142_MOUSE;	Protein FAM114A2 OS=Mus musculus OX=10090 GN=Fam114a2 PE=1 SV=2;	PF05334	DUF719	Protein of unknown function
TRINITY_DN20985_c0_g1	1.26365	0.000286224	0.00184506	up	-1.72968	5.77862e-09	1.23415e-07	down	60S ribosomal protein L23a [Anoplophora glabripennis]	328.43	GO:0000027;GO:0006412;GO:0022625;GO:0005840;GO:0003735	BP:ribosomal large subunit assembly;BP:translation;CC:cytosolic large ribosomal subunit;CC:ribosome;MF:structural constituent of ribosome;	K02893	RP-L23Ae, RPL23A	map03010	Ribosome	COG0089	J:Translation, ribosomal structure and biogenesis	sp|Q24JY1|RL23A_BOVIN;	60S ribosomal protein L23a OS=Bos taurus OX=9913 GN=RPL23A PE=2 SV=1;	PF00276	Ribosomal_L23	Ribosomal protein L23
TRINITY_DN20987_c0_g1	1.29561	0.000801828	0.00434926	up	-2.17674	7.32204e-05	0.000508491	down	PREDICTED: 26S proteasome non-ATPase regulatory subunit 11 [Dendroctonus ponderosae]	21.96	GO:0006511;GO:0043248;GO:0000502;GO:0008541;GO:0005198	BP:ubiquitin-dependent protein catabolic process;BP:proteasome assembly;CC:proteasome complex;CC:proteasome regulatory particle, lid subcomplex;MF:structural molecule activity;	K03036	PSMD11, RPN6	map03050;map05169	Proteasome;Epstein-Barr virus infection	COG5159	O:Posttranslational modification, protein turnover, chaperones	sp|Q7KLV9|PSD11_DROME;	26S proteasome non-ATPase regulatory subunit 11 OS=Drosophila melanogaster OX=7227 GN=Rpn6 PE=1 SV=1;	PF18055;PF01399	RPN6_N;PCI	26S proteasome regulatory subunit RPN6 N-terminal domain;PCI domain
TRINITY_DN21009_c2_g8	-2.50747	2.63311e-06	3.41473e-05	down	-4.50536	8.51144e-11	2.71399e-09	down	PREDICTED: uncharacterized protein LOC109539536 [Dendroctonus ponderosae]	3.25	GO:0046872;GO:0004722	MF:metal ion binding;MF:protein serine/threonine phosphatase activity;	K17501	PPM1E, POPX1	------	------	COG0631	S:Function unknown	sp|Q80Z30|PPM1E_RAT;	Protein phosphatase 1E OS=Rattus norvegicus OX=10116 GN=Ppm1e PE=1 SV=1;	PF00481	PP2C	Protein phosphatase 2C
TRINITY_DN21044_c2_g7	2.82767	0.0015854	0.00759591	up	5.53448	0.000242196	0.00143236	up		0.44	------	------	------	------	------	------	------	------	------	------	------	------	------
TRINITY_DN21051_c0_g1	-3.92763	2.00837e-15	2.31139e-13	down	4.68667	0.000138508	0.000881149	up	PREDICTED: uncharacterized protein LOC109538021 isoform X1 [Dendroctonus ponderosae]	10.83	GO:0006030;GO:0005576;GO:0008061	BP:chitin metabolic process;CC:extracellular region;MF:chitin binding;	------	------	------	------	ENOG41118TF	S:Function unknown	------	------	PF01607	CBM_14	Chitin binding Peritrophin-A domain
TRINITY_DN21052_c0_g1	-1.41331	0.00090492	0.00480534	down	-4.39374	1.11218e-44	3.78984e-41	down	PREDICTED: peroxisomal multifunctional enzyme type 2-like [Dendroctonus ponderosae] >ENN78237.1 hypothetical protein YQE_05388, partial [Dendroctonus ponderosae]	10.67	GO:0016829;GO:0016491	MF:lyase activity;MF:oxidoreductase activity;	K12405	HSD17B4	map04146;map00120;map01040	Peroxisome;Primary bile acid biosynthesis;Biosynthesis of unsaturated fatty acids	COG2030	I:Lipid transport and metabolism	sp|Q9VXJ0|DHB4_DROME;	Peroxisomal multifunctional enzyme type 2 OS=Drosophila melanogaster OX=7227 GN=Mfe2 PE=1 SV=1;	PF01575;PF13452	MaoC_dehydratas;MaoC_dehydrat_N	MaoC like domain;N-terminal half of MaoC dehydratase
TRINITY_DN21053_c0_g1	-3.67088	4.05341e-07	6.76946e-06	down	-4.32671	0.00119467	0.0055501	down	unknown [Dendroctonus ponderosae]	14.75	GO:0005975;GO:0004553	BP:carbohydrate metabolic process;MF:hydrolase activity, hydrolyzing O-glycosyl compounds;	------	------	------	------	COG2723	G:Carbohydrate transport and metabolism	sp|Q95X01|MYRO1_BREBR;	Myrosinase 1 OS=Brevicoryne brassicae OX=69196 PE=1 SV=1;	PF00232	Glyco_hydro_1	Glycosyl hydrolase family 1
TRINITY_DN21061_c0_g1	1.59629	1.29597e-05	0.000135437	up	-1.95641	1.43056e-07	2.1422e-06	down	hypothetical protein YQE_07762, partial [Dendroctonus ponderosae]	43.18	GO:0000122;GO:0045944;GO:0010033;GO:0005654;GO:0000790;GO:0005667;GO:0003700;GO:0000978;GO:0000981	BP:negative regulation of transcription from RNA polymerase II promoter;BP:positive regulation of transcription from RNA polymerase II promoter;BP:response to organic substance;CC:nucleoplasm;CC:nuclear chromatin;CC:transcription factor complex;MF:transcription factor activity, sequence-specific DNA binding;MF:RNA polymerase II core promoter proximal region sequence-specific DNA binding;MF:RNA po…	K09027	XBP1	map04932;map04141	Non-alcoholic fatty liver diseas;Protein processing in endoplasmic reticulum	ENOG410XSJI	K:Transcription	------	------	------	------	------
TRINITY_DN21088_c0_g2	1.70445	0.00117515	0.00595058	up	-1.80895	1.40252e-05	0.000122571	down	PREDICTED: zinc finger and BTB domain-containing protein 41-like [Dendroctonus ponderosae]	7.49	GO:0005634;GO:0008270;GO:0003676	CC:nucleus;MF:zinc ion binding;MF:nucleic acid binding;	------	------	------	------	COG5048	S:Function unknown	------	------	PF13909;PF00096;PF18387	zf-H2C2_5;zf-C2H2;zf_C2H2_ZHX	C2H2-type zinc-finger domain;Zinc finger, C2H2 type;Zinc-fingers and homeoboxes C2H2 finger domain
TRINITY_DN21089_c0_g1	-6.83372	4.40403e-07	7.27989e-06	down	-3.56589	0.000718962	0.00360946	down	unknown [Dendroctonus ponderosae] >ERL89367.1 hypothetical protein D910_06738 [Dendroctonus ponderosae]	1.78	GO:0016021	CC:integral component of membrane;	K11153	RDH12	map00830	Retinol metabolism	COG1028	S:Function unknown	sp|Q8CEE7|RDH13_MOUSE;	Retinol dehydrogenase 13 OS=Mus musculus OX=10090 GN=Rdh13 PE=1 SV=1;	PF00106;PF13561;PF08659	adh_short;adh_short_C2;KR	short chain dehydrogenase;Enoyl;KR domain
TRINITY_DN21107_c0_g1	1.63683	0.00135474	0.00667926	up	1.37568	0.00016839	0.00104416	up		14.65	------	------	------	------	------	------	------	------	------	------	------	------	------
TRINITY_DN21115_c0_g1	1.71289	0.00202255	0.00929682	up	2.26885	0.00074899	0.00373758	up	PREDICTED: tRNA pseudouridine synthase A, mitochondrial [Dendroctonus ponderosae] >ENN71395.1 hypothetical protein YQE_11899, partial [Dendroctonus ponderosae] >ERL94447.1 hypothetical protein D910_11724 [Dendroctonus ponderosae]	9.71	GO:0031119;GO:1990481;GO:0005634;GO:0106029;GO:0009982;GO:0003723	BP:tRNA pseudouridine synthesis;BP:mRNA pseudouridine synthesis;CC:nucleus;MF:tRNA pseudouridine synthase activity;MF:pseudouridine synthase activity;MF:RNA binding;	K06173	truA, PUS1	------	------	COG0101	Z:Cytoskeleton	sp|Q9WU56|TRUA_MOUSE;	tRNA pseudouridine synthase A OS=Mus musculus OX=10090 GN=Pus1 PE=1 SV=2;	PF01416	PseudoU_synth_1	tRNA pseudouridine synthase
TRINITY_DN21117_c0_g1	-3.77439	6.73494e-09	1.87882e-07	down	-6.28307	1.47858e-10	4.42821e-09	down	PREDICTED: mucin-2-like [Dendroctonus ponderosae]	165.2	GO:0006508;GO:0005615;GO:0004252	BP:proteolysis;CC:extracellular space;MF:serine-type endopeptidase activity;	------	------	------	------	COG5640	S:Function unknown	------	------	------	------	------
TRINITY_DN21122_c6_g1	-2.14628	9.74494e-05	0.000747474	down	-3.51766	8.98487e-07	1.09689e-05	down	PREDICTED: 60S acidic ribosomal protein P1 [Dendroctonus ponderosae]	1213.95	GO:0009264;GO:0006414;GO:0005840;GO:0003735;GO:0004139	BP:deoxyribonucleotide catabolic process;BP:translational elongation;CC:ribosome;MF:structural constituent of ribosome;MF:deoxyribose-phosphate aldolase activity;	K02942	RP-LP1, RPLP1	map03010	Ribosome	COG2058	O:Posttranslational modification, protein turnover, chaperones	sp|P08570|RLA1_DROME;	60S acidic ribosomal protein P1 OS=Drosophila melanogaster OX=7227 GN=RpLP1 PE=1 SV=2;	PF00428	Ribosomal_60s	60s Acidic ribosomal protein
TRINITY_DN21125_c1_g1	-3.17515	3.15325e-06	4.00246e-05	down	-2.80679	0.000723679	0.00362714	down		20.05	------	------	------	------	------	------	------	------	------	------	------	------	------
TRINITY_DN21149_c0_g2	-3.38273	5.46926e-12	3.0639e-10	down	4.77882	0.00143078	0.00645781	up		486.49	------	------	------	------	------	------	------	------	------	------	------	------	------
TRINITY_DN21154_c0_g1	2.05043	0.000689087	0.00383297	up	1.78971	0.000188989	0.00115554	up	hypothetical protein YQE_08803, partial [Dendroctonus ponderosae]	14.58	GO:0016021	CC:integral component of membrane;	------	------	------	------	ENOG4111GDB	S:Function unknown	------	------	------	------	------
TRINITY_DN21156_c2_g1	1.50005	0.00154035	0.00741873	up	1.94046	0.00213562	0.00902701	up	hypothetical protein D910_11144 [Dendroctonus ponderosae]	7.11	GO:0005634;GO:0004527;GO:0003676	CC:nucleus;MF:exonuclease activity;MF:nucleic acid binding;	K14570	REX1, REXO1, RNH70	map03008	Ribosome biogenesis in eukaryotes	COG0847	S:Function unknown	sp|Q2T9U5|REXO5_BOVIN;	RNA exonuclease 5 OS=Bos taurus OX=9913 GN=REXO5 PE=2 SV=1;	PF00929	RNase_T	Exonuclease
TRINITY_DN21167_c0_g1	2.33322	0.000280004	0.00181214	up	4.46738	1.37045e-06	1.59005e-05	up	hypothetical protein YQE_08495, partial [Dendroctonus ponderosae]	0.41	GO:0030036;GO:0005856;GO:0016021	BP:actin cytoskeleton organization;CC:cytoskeleton;CC:integral component of membrane;	------	------	------	------	ENOG410XRBQ	S:Function unknown	------	------	------	------	------
TRINITY_DN21168_c5_g7	4.92768	1.8474e-06	2.51432e-05	up	6.99548	0.000227499	0.00135668	up	PREDICTED: coiled-coil domain-containing protein 1-like, partial [Dendroctonus ponderosae]	0.06	------	------	------	------	------	------	ENOG4111JSP	S:Function unknown	------	------	PF15998;PF02724	DUF4773;CDC45	Domain of unknown function;CDC45-like protein
TRINITY_DN21168_c5_g8	2.94985	4.24927e-12	2.44009e-10	up	1.96722	7.4771e-07	9.26793e-06	up	PREDICTED: E3 SUMO-protein ligase RanBP2-like isoform X2 [Dendroctonus ponderosae]	11.77	GO:0043547;GO:0046907;GO:0005737;GO:0005643;GO:0005634;GO:0005623;GO:0008536;GO:0046872;GO:0016874	BP:positive regulation of GTPase activity;BP:intracellular transport;CC:cytoplasm;CC:nuclear pore;CC:nucleus;CC:cell;MF:Ran GTPase binding;MF:metal ion binding;MF:ligase activity;	K12172	RANBP2, NUP358	map03013	RNA transport	COG5171	U:Intracellular trafficking, secretion, and vesicular transport	------	------	------	------	------
TRINITY_DN21171_c1_g1	6.03842	4.02412e-05	0.000353973	up	6.0379	0.00149366	0.00669029	up		0	------	------	------	------	------	------	------	------	------	------	------	------	------
TRINITY_DN21171_c2_g2	2.99522	3.45156e-06	4.34104e-05	up	3.27115	1.00615e-05	9.22168e-05	up		5.35	------	------	------	------	------	------	------	------	------	------	------	------	------
TRINITY_DN21182_c1_g5	3.04591	0.00100655	0.00524258	up	6.55841	7.2272e-07	8.99783e-06	up		0.41	------	------	------	------	------	------	------	------	------	------	------	------	------
TRINITY_DN21188_c2_g3	2.66298	2.52299e-09	7.91302e-08	up	2.09638	1.15616e-05	0.000104031	up	PREDICTED: longitudinals lacking protein isoform X20 [Aethina tumida]	1.24	GO:0006357;GO:0005634;GO:0003676	BP:regulation of transcription from RNA polymerase II promoter;CC:nucleus;MF:nucleic acid binding;	------	------	------	------	COG5048;ENOG410YPVD	S:Function unknown;	sp|Q9V5M3|LOLA6_DROME;	Longitudinals lacking protein, isoforms N/O/W/X/Y OS=Drosophila melanogaster OX=7227 GN=lola PE=1 SV=3;	PF00096;PF13909;PF13894;PF07754	zf-C2H2;zf-H2C2_5;zf-C2H2_4;DUF1610	Zinc finger, C2H2 type;C2H2-type zinc-finger domain;C2H2-type zinc finger;Domain of unknown function
TRINITY_DN21190_c0_g1	3.5046	0.00108369	0.00556328	up	4.07974	0.000612659	0.00316104	up	PREDICTED: uncharacterized protein LOC109538787 [Dendroctonus ponderosae] >ENN76128.1 hypothetical protein YQE_07348, partial [Dendroctonus ponderosae] >ERL87518.1 hypothetical protein D910_04910 [Dendroctonus ponderosae]	0.1	GO:0042302	MF:structural constituent of cuticle;	------	------	------	------	ENOG4111I81	S:Function unknown	------	------	------	------	------
TRINITY_DN21202_c0_g1	4.60182	1.05966e-05	0.000113811	up	7.47306	1.52042e-05	0.000130745	up		0.05	------	------	------	------	------	------	------	------	------	------	------	------	------
TRINITY_DN21206_c0_g1	-2.5358	8.19764e-06	9.14744e-05	down	-6.21424	4.40157e-08	7.49582e-07	down	unknown [Dendroctonus ponderosae] >ERL86508.1 hypothetical protein D910_03912 [Dendroctonus ponderosae]	23	GO:0005615;GO:0016787;GO:0052689	CC:extracellular space;MF:hydrolase activity;MF:carboxylic ester hydrolase activity;	------	------	------	------	COG2272	I:Lipid transport and metabolism	sp|P35502|ESTF_MYZPE;	Esterase FE4 OS=Myzus persicae OX=13164 PE=1 SV=1;	PF00135;PF07859	COesterase;Abhydrolase_3	Carboxylesterase family;alpha/beta hydrolase fold
TRINITY_DN21220_c2_g1	3.36322	6.95741e-09	1.92809e-07	up	4.57564	0.000137541	0.000876094	up	hypothetical protein D910_03082 [Dendroctonus ponderosae]	0.55	------	------	K09856	RASSF9_10	------	------	ENOG410XPWB	S:Function unknown	------	------	------	------	------
TRINITY_DN21223_c0_g1	1.30992	0.000384299	0.00236319	up	2.16864	3.71444e-15	2.78094e-13	up	PREDICTED: zinc finger Y-chromosomal protein 2-like [Dendroctonus ponderosae]	9.67	GO:0005634;GO:0004721	CC:nucleus;MF:phosphoprotein phosphatase activity;	K13119	FAM50, XAP5	------	------	ENOG410XNXM	S:Function unknown	sp|Q16U25|FAM50_AEDAE;	Protein FAM50 homolog OS=Aedes aegypti OX=7159 GN=AAEL010045 PE=3 SV=1;	PF13909;PF18387	zf-H2C2_5;zf_C2H2_ZHX	C2H2-type zinc-finger domain;Zinc-fingers and homeoboxes C2H2 finger domain
TRINITY_DN21233_c1_g1	-2.93503	2.74991e-15	3.02556e-13	down	2.11193	0.00174628	0.00758703	up	PREDICTED: probable isocitrate dehydrogenase [NAD] subunit alpha, mitochondrial isoform X1 [Dendroctonus ponderosae] >XP_019767894.1 PREDICTED: probable isocitrate dehydrogenase [NAD] subunit alpha, mitochondrial isoform X1 [Dendroctonus ponderosae] >XP_019767895.1 PREDICTED: probable isocitrate dehydrogenase [NAD] subunit alpha, mitochondrial isoform X1 [Dendroctonus ponderosae]	351.9	GO:0006099;GO:0006102;GO:0005739;GO:0051287;GO:0000287;GO:0004449	BP:tricarboxylic acid cycle;BP:isocitrate metabolic process;CC:mitochondrion;MF:NAD binding;MF:magnesium ion binding;MF:isocitrate dehydrogenas;	K00030	IDH3	map00020	Citrate cycl	COG0473	E:Amino acid transport and metabolism	sp|Q9VWH4|IDH3A_DROME;	Probable isocitrate dehydrogenase [NAD] subunit alpha, mitochondrial OS=Drosophila melanogaster OX=7227 GN=;	PF00180	Iso_dh	Isocitrate/isopropylmalate dehydrogenase
TRINITY_DN21252_c0_g1	1.99564	9.23713e-06	0.000101226	up	-3.25868	1.88425e-09	4.40036e-08	down	PREDICTED: beta-1,3-glucan-binding protein [Dendroctonus ponderosae] >ENN74953.1 hypothetical protein YQE_08530, partial [Dendroctonus ponderosae]	23.84	GO:0005975;GO:0045088;GO:0045087;GO:0042742;GO:0005576;GO:0030246;GO:0004553	BP:carbohydrate metabolic process;BP:regulation of innate immune response;BP:innate immune response;BP:defense response to bacterium;CC:extracellular region;MF:carbohydrate binding;MF:hydrolase activity, hydrolyzing O-glycosyl compounds;	K20697;K20692	GNBP1;GNBP3	map04624	Toll and Imd signaling pathway	ENOG410Z83Q	S:Function unknown	sp|Q76DI2|BGBP_TENMO;	Beta-1,3-glucan-binding protein OS=Tenebrio molitor OX=7067 GN=GRP PE=1 SV=1;	PF15886;PF00722	CBM39;Glyco_hydro_16	Carbohydrate binding domain;Glycosyl hydrolases family 16
TRINITY_DN21268_c3_g2	-2.67503	6.83671e-05	0.000551953	down	3.34518	7.68221e-07	9.49294e-06	up		12.38	------	------	------	------	------	------	------	------	------	------	------	------	------
TRINITY_DN21285_c0_g1	3.45372	5.42315e-05	0.000454507	up	5.65734	0.000927335	0.00446506	up	PREDICTED: tRNA-dihydrouridin	0.93	------	------	------	------	------	------	------	------	------	------	------	------	------
TRINITY_DN21292_c2_g1	2.06044	0.000272262	0.00177251	up	-2.25033	0.00230404	0.00957251	down	PREDICTED: uncharacterized protein LOC109533267 [Dendroctonus ponderosae] >ENN80790.1 hypothetical protein YQE_02799, partial [Dendroctonus ponderosae] >ERL91160.1 hypothetical protein D910_08500 [Dendroctonus ponderosae]	12.66	GO:0007165	BP:signal transduction;	------	------	------	------	------	------	------	------	------	------	------
TRINITY_DN21294_c0_g1	3.14056	7.13585e-06	8.11404e-05	up	6.16712	4.22613e-05	0.000316162	up	PREDICTED: mono [ADP-ribose] polymerase PARP16-like isoform X1 [Dendroctonus ponderosae] >ENN80318.1 hypothetical protein YQE_03311, partial [Dendroctonus ponderosae] >ERL94781.1 hypothetical protein D910_12055 [Dendroctonus ponderosae]	2.39	GO:0030968;GO:0006471;GO:0005783;GO:0016021;GO:0005635;GO:0071782;GO:0019900;GO:0003950;GO:0043539	BP:endoplasmic reticulum unfolded protein response;BP:protein ADP-ribosylation;CC:endoplasmic reticulum;CC:integral component of membrane;CC:nuclear envelope;CC:endoplasmic reticulum tubular network;MF:kinase binding;MF:NAD+ ADP-ribosyltransferase activity;MF:protein serine/threonine kinase activator activity;	K00774	PARP16	------	------	ENOG410ZP73	S:Function unknown	sp|Q5U2Q4|PAR16_RAT;	Protein mono-ADP-ribosyltransferase PARP16 OS=Rattus norvegicus OX=10116 GN=Parp16 PE=2 SV=1;	------	------	------
TRINITY_DN21301_c0_g1	2.55975	0.00123344	0.00618881	up	7.64751	4.37504e-08	7.45761e-07	up		0.37	------	------	------	------	------	------	------	------	------	------	------	------	------
TRINITY_DN21390_c1_g1	2.23061	1.5738e-05	0.000159267	up	-1.46263	0.000727023	0.00364191	down	hypothetical protein YQE_00748, partial [Dendroctonus ponderosae]	4.12	GO:0006355;GO:0005634;GO:0043565;GO:0003676	BP:regulation of transcription, DNA-templated;CC:nucleus;MF:sequence-specific DNA binding;MF:nucleic acid binding;	------	------	------	------	------	------	sp|O77459|KEN_DROME;	Transcription factor Ken OS=Drosophila melanogaster OX=7227 GN=ken PE=2 SV=1;	------	------	------
TRINITY_DN21421_c0_g1	3.78382	9.12203e-13	6.13367e-11	up	3.1084	0.00118206	0.0055041	up		14.54	------	------	------	------	------	------	------	------	------	------	------	------	------
TRINITY_DN21426_c0_g1	5.24693	3.32002e-14	3.0339e-12	up	6.27412	3.70586e-09	8.20281e-08	up	PREDICTED: cystathionine beta-synthase-like [Dendroctonus ponderosae]	2.44	GO:0050667;GO:0019346;GO:0070814;GO:0006535;GO:0019343;GO:0005737;GO:0004122;GO:0004124;GO:0030170	BP:homocysteine metabolic process;BP:transsulfuration;BP:hydrogen sulfide biosynthetic process;BP:cysteine biosynthetic process from serine;BP:cysteine biosynthetic process via cystathionine;CC:cytoplasm;MF:cystathionine beta-synthase activity;MF:cysteine synthase activity;MF:pyridoxal phosphate binding;	K01697	CBS	map00270;map00260	Cysteine and methionine metabolism;Glycine, serine and threonine metabolism	COG0031	E:Amino acid transport and metabolism	sp|P32232|CBS_RAT;	Cystathionine beta-synthase OS=Rattus norvegicus OX=10116 GN=Cbs PE=1 SV=3;	PF00291	PALP	Pyridoxal-phosphate dependent enzyme
TRINITY_DN21435_c0_g4	-2.26238	2.08541e-05	0.00020269	down	-3.99126	2.06432e-07	2.98581e-06	down	PREDICTED: uncharacterized protein LOC109545448 [Dendroctonus ponderosae]	5.27	GO:0016021;GO:0008028	CC:integral component of membrane;MF:monocarboxylic acid transmembrane transporter activity;	------	------	------	------	ENOG4111MGQ;ENOG4110QZH	S:Function unknown;	------	------	------	------	------
TRINITY_DN21451_c0_g3	5.81282	0.000114285	0.000854451	up	5.28506	0.000384484	0.00212374	up		1.01	------	------	------	------	------	------	------	------	------	------	------	------	------
TRINITY_DN21456_c1_g1	-3.96862	5.0857e-08	1.11022e-06	down	5.5969	0.000128195	0.000822715	up		43.67	------	------	------	------	------	------	------	------	------	------	------	------	------
TRINITY_DN21469_c0_g1	-1.65548	0.000105607	0.000800446	down	-3.58411	1.58592e-11	5.84354e-10	down	PREDICTED: clavesin-1 [Dendroctonus ponderosae]	55.86	------	------	------	------	------	------	ENOG410XRSQ	S:Function unknown	sp|Q5RCA6|CLVS1_PONAB;	Clavesin-1 OS=Pongo abelii OX=9601 GN=CLVS1 PE=2 SV=1;	PF00650;PF13716	CRAL_TRIO;CRAL_TRIO_2	CRAL/TRIO domain;Divergent CRAL/TRIO domain
TRINITY_DN21487_c0_g2	1.85672	0.000687093	0.00382652	up	2.26886	7.7965e-05	0.000535618	up	hypothetical protein D910_05029 [Dendroctonus ponderosae]	6.04	GO:0006470;GO:0005634;GO:0004722;GO:0004721	BP:protein dephosphorylation;CC:nucleus;MF:protein serine/threonine phosphatase activity;MF:phosphoprotein phosphatase activity;	K17618	UBLCP1	------	------	COG5190	K:Transcription	sp|Q6DI37|UBCP1_DANRE;	Ubiquitin-like domain-containing CTD phosphatase 1 OS=Danio rerio OX=7955 GN=ublcp1 PE=2 SV=1;	PF03031;PF00240	NIF;ubiquitin	NLI interacting factor-like phosphatase;Ubiquitin family
TRINITY_DN21488_c0_g4	-4.76985	7.11601e-19	1.47168e-16	down	-2.61034	5.02693e-05	0.000367627	down	PREDICTED: trifunctional enzyme subunit alpha, mitochondrial-like [Dendroctonus ponderosae] >AEE63458.1 unknown [Dendroctonus ponderosae]	49.1	GO:0006635;GO:0016507;GO:0004300;GO:0003857	BP:fatty acid beta-oxidation;CC:mitochondrial fatty acid beta-oxidation multienzyme complex;MF:enoyl-CoA hydratase activity;MF:3-hydroxyacyl-CoA dehydrogenase activity;	K07515	HADHA	map00310;map00280;map00062;map00650;map00410;map00071;map00640;map00380	Lysine degradation;Valine, leucine and isoleucine degradation;Fatty acid elongation;Butanoate metabolism;beta-Alanine metabolism;Fatty acid degradation;Propanoate metabolism;Tryptophan metabolism	COG1250	S:Function unknown	sp|Q29554|ECHA_PIG;	Trifunctional enzyme subunit alpha, mitochondrial OS=Sus scrofa OX=9823 GN=HADHA PE=1 SV=1;	PF00378;PF16113	ECH_1;ECH_2	Enoyl-CoA hydratase/isomerase;Enoyl-CoA hydratase/isomerase
TRINITY_DN21489_c4_g1	2.00439	5.6173e-05	0.000467926	up	1.84487	0.000327805	0.00185505	up		5.8	------	------	------	------	------	------	------	------	------	------	------	------	------
TRINITY_DN21495_c0_g7	5.44069	1.28226e-08	3.34629e-07	up	6.30847	1.92862e-05	0.000160328	up		0.09	------	------	------	------	------	------	------	------	------	------	------	------	------
TRINITY_DN21497_c0_g1	2.3134	3.93122e-07	6.60148e-06	up	4.55731	5.19774e-15	3.79206e-13	up		6.39	------	------	------	------	------	------	------	------	------	------	------	------	------
TRINITY_DN21502_c0_g3	-2.83072	1.63032e-12	1.02617e-10	down	-2.85303	9.11775e-12	3.53075e-10	down	PREDICTED: cell growth regulator with RING finger domain protein 1-like [Dendroctonus ponderosae]	27.54	GO:0016021	CC:integral component of membrane;	------	------	------	------	ENOG4111F4I;ENOG410ZMM2	S:Function unknown;	sp|Q99675|CGRF1_HUMAN;	Cell growth regulator with RING finger domain protein 1 OS=Homo sapiens OX=9606 GN=CGRRF1 PE=1 SV=1;	PF13920;PF14447	zf-C3HC4_3;Prok-RING_4	Zinc finger, C3HC4 type;Prokaryotic RING finger family 4
TRINITY_DN21516_c0_g1	-3.02663	3.99071e-07	6.68505e-06	down	-3.17131	1.52247e-05	0.000130859	down	unknown [Dendroctonus ponderosae]	9	GO:0016787;GO:0004104	MF:hydrolase activity;MF:cholinesterase activity;	------	------	------	------	COG2272	I:Lipid transport and metabolism	sp|Q8N0W4|NLGNX_HUMAN;	Neuroligin-4, X-linked OS=Homo sapiens OX=9606 GN=NLGN4X PE=1 SV=1;	PF00135;PF07859;PF00326	COesterase;Abhydrolase_3;Peptidase_S9	Carboxylesterase family;alpha/beta hydrolase fold;Prolyl oligopeptidase family
TRINITY_DN21552_c0_g1	-3.32222	3.18637e-05	0.000291067	down	4.87957	0.00219301	0.00922293	up		7.96	------	------	------	------	------	------	------	------	------	------	------	------	------
TRINITY_DN21566_c1_g1	2.87057	1.90174e-08	4.79497e-07	up	5.80358	3.09921e-16	2.81227e-14	up		435.84	------	------	------	------	------	------	------	------	------	------	------	------	------
TRINITY_DN21572_c1_g2	-3.45668	3.63708e-18	6.85216e-16	down	-2.07543	0.00174552	0.00758556	down	PREDICTED: Krueppel homolog 2 [Dendroctonus ponderosae] >ENN72846.1 hypothetical protein YQE_10526, partial [Dendroctonus ponderosae]	75.91	GO:0016021;GO:0005783	CC:integral component of membrane;CC:endoplasmic reticulum;	K20724	TMEM33	------	------	ENOG4111BM3	S:Function unknown	sp|Q9V447|KRH2_DROME;	Krueppel homolog 2 OS=Drosophila melanogaster OX=7227 GN=Kr-h2 PE=1 SV=1;	PF03661	UPF0121	Uncharacterised protein family
TRINITY_DN21578_c0_g6	3.2899	0.000279911	0.00181204	up	5.34105	0.00100222	0.00477021	up		0.19	------	------	------	------	------	------	------	------	------	------	------	------	------
TRINITY_DN21581_c0_g1	2.74253	3.1261e-06	3.97125e-05	up	2.0877	0.000185437	0.00113725	up	hypothetical protein D910_01397 [Dendroctonus ponderosae]	5.84	------	------	------	------	------	------	ENOG410ZSJ8;COG2801;ENOG410ZHTZ	S:Function unknown;	------	------	------	------	------
TRINITY_DN21594_c2_g1	2.91282	3.00373e-06	3.84103e-05	up	2.65941	0.000467656	0.00251387	up	PREDICTED: uncharacterized protein LOC109543328 [Dendroctonus ponderosae]	1.11	------	------	------	------	------	------	------	------	------	------	------	------	------
TRINITY_DN21599_c0_g1	3.31095	3.22343e-05	0.000294172	up	4.60154	0.00221931	0.00930315	up		3.86	------	------	------	------	------	------	------	------	------	------	------	------	------
TRINITY_DN21610_c0_g1	2.09408	7.30951e-05	0.000584124	up	-1.52699	8.5441e-06	8.01212e-05	down	hypothetical protein YQE_07337, partial [Dendroctonus ponderosae]	3.17	GO:0005634;GO:0008270;GO:0003676	CC:nucleus;MF:zinc ion binding;MF:nucleic acid binding;	------	------	------	------	COG5048	S:Function unknown	------	------	PF13465;PF00096;PF07776	zf-H2C2_2;zf-C2H2;zf-AD	Zinc-finger double domain;Zinc finger, C2H2 type;Zinc-finger associated domain
TRINITY_DN21612_c0_g1	-3.44576	1.41076e-09	4.71841e-08	down	-2.19672	0.00105725	0.00500343	down	PREDICTED: clavesin-2-like isoform X1 [Dendroctonus ponderosae]	8.16	------	------	------	------	------	------	ENOG410XRSQ	S:Function unknown	sp|Q5SPP0|CLVS2_DANRE;	Clavesin-2 OS=Danio rerio OX=7955 GN=clvs2 PE=2 SV=1;	PF00650;PF03765	CRAL_TRIO;CRAL_TRIO_N	CRAL/TRIO domain;CRAL/TRIO, N-terminal domain
TRINITY_DN21624_c1_g3	1.6971	0.000450549	0.00269937	up	4.01818	1.99736e-11	7.22856e-10	up	ADP-ribosylation factor-like protein 16 [Asbolus verrucosus]	15.36	------	------	------	------	------	------	------	------	------	------	------	------	------
TRINITY_DN21627_c1_g2	-5.33457	2.52161e-11	1.25197e-09	down	-3.3563	0.000928237	0.00446823	down		41.13	------	------	------	------	------	------	------	------	------	------	------	------	------
TRINITY_DN21631_c1_g1	-2.57388	2.835e-12	1.67698e-10	down	7.54548	2.21021e-14	1.41944e-12	up	PREDICTED: transmembrane protein 35B isoform X1 [Dendroctonus ponderosae] >ENN79682.1 hypothetical protein YQE_03887, partial [Dendroctonus ponderosae] >ERL86099.1 hypothetical protein D910_03513 [Dendroctonus ponderosae]	23.5	GO:0016021	CC:integral component of membrane;	------	------	------	------	ENOG4111K2N	S:Function unknown	sp|A4IGI5|TM35A_XENTR;	Transmembrane protein 35A OS=Xenopus tropicalis OX=8364 GN=tmem35a PE=2 SV=1;	PF13564	DoxX_2	DoxX-like family
TRINITY_DN21652_c3_g1	-1.58065	0.00188597	0.00877758	down	3.39332	3.18166e-07	4.41631e-06	up	PREDICTED: uncharacterized protein LOC109536828 [Dendroctonus ponderosae]	11.61	GO:0006313;GO:0004803;GO:0043565;GO:0003677	BP:transposition, DNA-mediated;MF:transposase activity;MF:sequence-specific DNA binding;MF:DNA binding;	------	------	------	------	ENOG410Y65V;ENOG410YDC3;ENOG4111JB0;ENOG4111JGQ;ENOG411206Y;ENOG4111KV5	S:Function unknown;	------	------	------	------	------
TRINITY_DN21655_c0_g2	2.39064	0.00199731	0.00920082	up	4.29706	0.000108847	0.000714382	up	hypothetical protein D910_11171 [Dendroctonus ponderosae]	4.57	------	------	------	------	------	------	------	------	------	------	------	------	------
TRINITY_DN21661_c0_g3	2.17627	0.00142613	0.00696136	up	4.07544	1.77409e-08	3.34964e-07	up		3.64	------	------	------	------	------	------	------	------	------	------	------	------	------
TRINITY_DN21663_c0_g3	2.9924	2.8489e-08	6.83191e-07	up	3.01656	2.18991e-06	2.40903e-05	up		2.22	------	------	------	------	------	------	------	------	------	------	------	------	------
TRINITY_DN21671_c2_g1	2.86202	1.74491e-05	0.000174592	up	4.83879	1.10179e-07	1.70881e-06	up	PREDICTED: dihydrofolate reductase isoform X1 [Dendroctonus ponderosae] >ENN72018.1 hypothetical protein YQE_11309, partial [Dendroctonus ponderosae]	2.78	GO:0006545;GO:0046654;GO:0004146;GO:0050661	BP:glycine biosynthetic process;BP:tetrahydrofolate biosynthetic process;MF:dihydrofolate reductase activity;MF:NADP binding;	------	------	------	------	------	------	------	------	PF00186	DHFR_1	Dihydrofolate reductase
TRINITY_DN21692_c0_g1	-1.44785	0.00110161	0.00564053	down	-2.15263	9.93065e-05	0.000660799	down	hypothetical protein YQE_05027, partial [Dendroctonus ponderosae]	31.82	------	------	------	------	------	------	------	------	------	------	------	------	------
TRINITY_DN21699_c0_g1	-1.89801	2.7406e-06	3.52587e-05	down	-1.54753	4.16133e-06	4.2119e-05	down	PREDICTED: DDB1- and CUL4-associated factor 7 [Dendroctonus ponderosae]	22.85	GO:0006418;GO:0005634;GO:0004812;GO:0016874;GO:0005524	BP:tRNA aminoacylation for protein translation;CC:nucleus;MF:aminoacyl-tRNA ligase activity;MF:ligase activity;MF:ATP binding;	K11805	WDR68, HAN11	------	------	ENOG410XQ78	S:Function unknown	sp|P61962|DCAF7_HUMAN;	DDB1- and CUL4-associated factor 7 OS=Homo sapiens OX=9606 GN=DCAF7 PE=1 SV=1;	PF00400	WD40	WD domain, G-beta repeat
TRINITY_DN21700_c0_g1	7.56858	8.76174e-09	2.37673e-07	up	7.00892	2.93626e-06	3.10169e-05	up		0.02	------	------	------	------	------	------	------	------	------	------	------	------	------
TRINITY_DN21722_c0_g1	2.47189	6.18171e-05	0.000507328	up	-2.43946	1.86042e-06	2.08301e-05	down	PREDICTED: DNA replication complex GINS protein SLD5 [Dendroctonus ponderosae] >AEE61558.1 unknown [Dendroctonus ponderosae]	2.12	GO:0000727;GO:0032509;GO:0006261;GO:0015031;GO:0032508;GO:0005634;GO:0000811;GO:0000813;GO:0031298;GO:0003676;GO:0005524	BP:double-strand break repair via break-induced replication;BP:endosome transport via multivesicular body sorting pathway;BP:DNA-dependent DNA replication;BP:protein transport;BP:DNA duplex unwinding;CC:nucleus;CC:GINS complex;CC:ESCRT I complex;CC:replication fork protection complex;MF:nucleic acid binding;MF:ATP binding;	K10735	GINS4, SLD5	------	------	COG5086	S:Function unknown	sp|Q9BRT9|SLD5_HUMAN;	DNA replication complex GINS protein SLD5 OS=Homo sapiens OX=9606 GN=GINS4 PE=1 SV=1;	PF16922;PF05916	SLD5_C;Sld5	DNA replication complex GINS protein SLD5 C-terminus;GINS complex protein
TRINITY_DN21741_c0_g1	2.79987	0.00123645	0.00620165	up	3.1024	0.00110038	0.00518333	up	PREDICTED: zinc finger protein 93-like [Dendroctonus ponderosae]	0.77	------	------	------	------	------	------	------	------	------	------	PF13894;PF05605;PF00096	zf-C2H2_4;zf-Di19;zf-C2H2	C2H2-type zinc finger;Drought induced 19 protein;Zinc finger, C2H2 type
TRINITY_DN21744_c0_g1	-3.23845	1.6936e-06	2.33505e-05	down	-2.71246	0.000544086	0.00285587	down	hypothetical protein YQE_07344, partial [Dendroctonus ponderosae] >ERL87524.1 hypothetical protein D910_04916 [Dendroctonus ponderosae]	5.19	GO:0006629;GO:0016042;GO:0016788	BP:lipid metabolic process;BP:lipid catabolic process;MF:hydrolase activity, acting on ester bonds;	------	------	------	------	COG0596	S:Function unknown	sp|O46108|LIP3_DROME;	Lipase 3 OS=Drosophila melanogaster OX=7227 GN=Lip3 PE=2 SV=1;	PF04083;PF00561;PF12146	Abhydro_lipase;Abhydrolase_1;Hydrolase_4	Partial alpha/beta-hydrolase lipase region;alpha/beta hydrolase fold;Serine aminopeptidase, S33
TRINITY_DN21745_c1_g1	-2.27535	9.74079e-08	1.97881e-06	down	-1.07054	0.00128194	0.00588652	down	PREDICTED: trithorax group protein osa isoform X3 [Dendroctonus ponderosae]	17.2	GO:0006338;GO:0035060;GO:0016514;GO:0003677	BP:chromatin remodeling;CC:brahma complex;CC:SWI/SNF complex;MF:DNA binding;	K11653	ARID1	------	------	ENOG410Y034	S:Function unknown	sp|Q8IN94|OSA_DROME;	Trithorax group protein osa OS=Drosophila melanogaster OX=7227 GN=osa PE=1 SV=1;	PF12031;PF01388	BAF250_C;ARID	SWI/SNF-like complex subunit BAF250/Osa;ARID/BRIGHT DNA binding domain
TRINITY_DN21745_c1_g3	2.38367	4.75738e-08	1.0519e-06	up	4.22752	1.2547e-14	8.53895e-13	up		7.96	------	------	------	------	------	------	------	------	------	------	------	------	------
TRINITY_DN21756_c0_g1	3.52441	0.000324235	0.00204504	up	6.19309	8.82846e-05	0.000597264	up		0.16	------	------	------	------	------	------	------	------	------	------	------	------	------
TRINITY_DN21761_c1_g3	6.5415	1.92958e-05	0.000189621	up	7.03307	0.00170907	0.00746985	up		0.05	------	------	------	------	------	------	------	------	------	------	------	------	------
TRINITY_DN21764_c0_g2	1.26299	0.000342966	0.00214352	up	-2.31486	4.62594e-06	4.6384e-05	down	PREDICTED: protein CDV3 homolog [Dendroctonus ponderosae]	36.08	------	------	------	------	------	------	ENOG41128QM	S:Function unknown	sp|O16053|CDV3_DROYA;	Protein CDV3 homolog OS=Drosophila yakuba OX=7245 GN=GE14456 PE=2 SV=1;	PF15359	CDV3	Carnitine deficiency-associated protein 3
TRINITY_DN21778_c0_g3	-6.81563	5.52496e-06	6.51649e-05	down	-6.47969	2.34946e-05	0.000191047	down	PREDICTED: tubby-related protein 4 [Dendroctonus ponderosae]	0.76	------	------	------	------	------	------	ENOG410YEKG	S:Function unknown	sp|Q9JIL5|TULP4_MOUSE;	Tubby-related protein 4 OS=Mus musculus OX=10090 GN=Tulp4 PE=1 SV=1;	------	------	------
TRINITY_DN21779_c0_g1	-2.77691	1.5672e-07	2.98321e-06	down	3.05766	0.000943271	0.00452388	up		6.39	------	------	------	------	------	------	------	------	------	------	------	------	------
TRINITY_DN21780_c1_g1	-1.84574	0.000148625	0.00106544	down	-2.51564	1.37461e-07	2.07202e-06	down	PREDICTED: fructose-1,6-bisphosphatase 1 [Dendroctonus ponderosae] >AEE63190.1 unknown [Dendroctonus ponderosae] >ERL93857.1 hypothetical protein D910_11143 [Dendroctonus ponderosae]	67.79	GO:0005975;GO:0030388;GO:0005986;GO:0006000;GO:0006002;GO:0006094;GO:0005737;GO:0005829;GO:0042132	BP:carbohydrate metabolic process;BP:fructose 1,6-bisphosphate metabolic process;BP:sucrose biosynthetic process;BP:fructose metabolic process;BP:fructose 6-phosphate metabolic process;BP:gluconeogenesis;CC:cytoplasm;CC:cytosol;MF:fructose 1,6-bisphosphate 1-phosphatase activity;	K03841	FBP, fbp	map04910;map00010;map00030;map00051;map04152	Insulin signaling pathway;Glycolysis / Gluconeogenesis;Pentose phosphate pathway;Fructose and mannose metabolism;AMPK signaling pathway	COG0158	S:Function unknown	sp|Q9QXD6|F16P1_MOUSE;	Fructose-1,6-bisphosphatase 1 OS=Mus musculus OX=10090 GN=Fbp1 PE=1 SV=3;	PF00316;PF00459	FBPase;Inositol_P	Fructose-1-6-bisphosphatase, N-terminal domain;Inositol monophosphatase family
TRINITY_DN21783_c1_g3	-1.88888	7.48716e-06	8.46453e-05	down	-1.43839	0.00106155	0.00502247	down	hypothetical protein YQE_03152, partial [Dendroctonus ponderosae] >ERL94589.1 hypothetical protein D910_11866, partial [Dendroctonus ponderosae]	27.13	GO:0019432;GO:0016021;GO:0005789;GO:0004144;GO:0016746	BP:triglyceride biosynthetic process;CC:integral component of membrane;CC:endoplasmic reticulum membrane;MF:diacylglycerol O-acyltransferase activity;MF:transferase activity, transferring acyl groups;	K11155	DGAT1	map00830;map00561;map04975	Retinol metabolism;Glycerolipid metabolism;Fat digestion and absorption	COG5056	I:Lipid transport and metabolism	sp|Q9GMF1|DGAT1_CHLAE;	Diacylglycerol O-acyltransferase 1 OS=Chlorocebus aethiops OX=9534 GN=DGAT1 PE=2 SV=1;	PF03062	MBOAT	MBOAT, membrane-bound O-acyltransferase family
TRINITY_DN21790_c0_g1	-4.87404	4.95652e-09	1.43359e-07	down	-8.64187	9.0791e-08	1.43745e-06	down	PREDICTED: heparanase-like [Dendroctonus ponderosae]	29.54	GO:0045048;GO:0016021;GO:0016020;GO:0016798	BP:protein insertion into ER membrane;CC:integral component of membrane;CC:membrane;MF:hydrolase activity, acting on glycosyl bonds;	K07964	HPSE	map05205;map00531	Proteoglycans in cancer;Glycosaminoglycan degradation	ENOG410YDJW	G:Carbohydrate transport and metabolism	sp|Q9Y251|HPSE_HUMAN;	Heparanase OS=Homo sapiens OX=9606 GN=HPSE PE=1 SV=2;	PF03662	Glyco_hydro_79n	Glycosyl hydrolase family 79, N-terminal domain
TRINITY_DN21822_c0_g1	-1.9948	4.09671e-05	0.000359096	down	-3.47876	3.1535e-06	3.30745e-05	down	PREDICTED: probable phosphoserine aminotransferase [Dendroctonus ponderosae] >AEE61919.1 unknown [Dendroctonus ponderosae] >ENN81968.1 hypothetical protein YQE_01679, partial [Dendroctonus ponderosae]	24.01	GO:0006564;GO:0004648;GO:0008483	BP:L-serine biosynthetic process;MF:O-phospho-L-serin;MF:transaminase activity;	K00831	serC, PSAT1	map00750;map00260	Vitamin B6 metabolism;Glycine, serine and threonine metabolism	COG1932	E:Amino acid transport and metabolism	sp|Q9VAN0|SERC_DROME;	Probable phosphoserine aminotransferase OS=Drosophila melanogaster OX=7227 GN=CG11899 PE=2 SV=1;	PF00266	Aminotran_5	Aminotransferase class-V
TRINITY_DN21829_c2_g1	6.86637	7.40384e-12	4.04871e-10	up	7.9088	1.0498e-08	2.13458e-07	up	hypothetical protein YQE_08562, partial [Dendroctonus ponderosae]	0.04	GO:0005634;GO:0003677	CC:nucleus;MF:DNA binding;	------	------	------	------	------	------	------	------	------	------	------
TRINITY_DN21836_c0_g1	-7.55831	3.6253e-50	1.66196e-46	down	-7.125	1.07967e-15	8.79111e-14	down	unknown [Dendroctonus ponderosae]	47.5	GO:0008234	MF:cysteine-type peptidase activity;	K01365	CTSL	map05205;map05323;map04612;map05418;map04145;map04210;map04142;map04140	Proteoglycans in cancer;Rheumatoid arthritis;Antigen processing and presentation;Fluid shear stress and atherosclerosis;Phagosome;Apoptosis;Lysosome;Autophagy - animal	COG4870	O:Posttranslational modification, protein turnover, chaperones	sp|Q26636|CATL_SARPE;	Cathepsin L OS=Sarcophaga peregrina OX=7386 PE=1 SV=1;	PF08246;PF00112	Inhibitor_I29;Peptidase_C1	Cathepsin propeptide inhibitor domain;Papain family cysteine protease
TRINITY_DN21836_c0_g2	-4.64564	4.84881e-18	9.01159e-16	down	-3.90721	9.49799e-05	0.000636188	down	unknown [Dendroctonus ponderosae]	192.33	GO:0008234	MF:cysteine-type peptidase activity;	K01365	CTSL	map05205;map05323;map04612;map05418;map04145;map04210;map04142;map04140	Proteoglycans in cancer;Rheumatoid arthritis;Antigen processing and presentation;Fluid shear stress and atherosclerosis;Phagosome;Apoptosis;Lysosome;Autophagy - animal	COG4870	O:Posttranslational modification, protein turnover, chaperones	sp|Q24940|CATLL_FASHE;	Cathepsin L-like proteinase OS=Fasciola hepatica OX=6192 GN=Cat-1 PE=1 SV=1;	PF00112;PF08246	Peptidase_C1;Inhibitor_I29	Papain family cysteine protease;Cathepsin propeptide inhibitor domain
TRINITY_DN21839_c0_g1	-2.74739	5.19369e-07	8.38859e-06	down	3.29621	0.00127113	0.00585016	up		29.34	------	------	------	------	------	------	------	------	------	------	------	------	------
TRINITY_DN21861_c0_g2	-4.22886	5.82121e-09	1.64769e-07	down	-4.79878	3.01391e-12	1.28737e-10	down	PREDICTED: F-box/SPRY domain-containing protein 1 [Dendroctonus ponderosae] >ENN81894.1 hypothetical protein YQE_01726, partial [Dendroctonus ponderosae] >ERL89272.1 hypothetical protein D910_06645 [Dendroctonus ponderosae]	4.46	GO:0043161;GO:0006511;GO:0060386;GO:0045202;GO:0019005	BP:proteasome-mediated ubiquitin-dependent protein catabolic process;BP:ubiquitin-dependent protein catabolic process;BP:synapse assembly involved in innervation;CC:synapse;CC:SCF ubiquitin ligase complex;	K10319	FBXO45	------	------	ENOG410XQC1	M:Cell wall/membrane/envelope biogenesis	sp|B4J6Q0|FBSP1_DROGR;	F-box/SPRY domain-containing protein 1 OS=Drosophila grimshawi OX=7222 GN=Fsn PE=3 SV=1;	PF00622;PF12937;PF00646;PF18511	SPRY;F-box-like;F-box;F-box_5	SPRY domain;F-box-like;F-box domain;F-box
TRINITY_DN21877_c2_g1	4.27095	2.12622e-11	1.07507e-09	up	4.46789	5.06872e-08	8.54422e-07	up		1.22	------	------	------	------	------	------	------	------	------	------	------	------	------
TRINITY_DN21877_c2_g2	4.99309	4.88167e-29	3.72986e-26	up	7.96738	1.06208e-21	2.30611e-19	up		117.28	------	------	------	------	------	------	------	------	------	------	------	------	------
TRINITY_DN21881_c0_g2	-3.87375	7.36543e-08	1.54652e-06	down	-7.12071	2.85171e-19	4.22864e-17	down	PREDICTED: major facilitator superfamily domain-containing protein 12-like [Dendroctonus ponderosae] >ENN79329.1 hypothetical protein YQE_04238, partial [Dendroctonus ponderosae]	10.76	GO:0071702;GO:0008643;GO:0016021;GO:0005887;GO:0015293	BP:organic substance transport;BP:carbohydrate transport;CC:integral component of membrane;CC:integral component of plasma membrane;MF:symporter activity;	------	------	------	------	COG2211	G:Carbohydrate transport and metabolism	sp|Q6NUT3|MFS12_HUMAN;	Major facilitator superfamily domain-containing protein 12 OS=Homo sapiens OX=9606 GN=MFSD12 PE=1 SV=2;	PF13347;PF07690	MFS_2;MFS_1	MFS/sugar transport protein;Major Facilitator Superfamily
TRINITY_DN21883_c1_g1	-1.25806	0.000186386	0.00128683	down	3.64742	1.25069e-10	3.83384e-09	up	PREDICTED: ras-like protein 3 [Dendroctonus ponderosae] >ENN80239.1 hypothetical protein YQE_03235, partial [Dendroctonus ponderosae] >ERL94854.1 hypothetical protein D910_12127 [Dendroctonus ponderosae]	33.15	GO:0007165;GO:0071320;GO:0032486;GO:0007264;GO:2000301;GO:0016020;GO:0005886;GO:0003924;GO:0019003;GO:0005525	BP:signal transduction;BP:cellular response to cAMP;BP:Rap protein signal transduction;BP:small GTPase mediated signal transduction;BP:negative regulation of synaptic vesicle exocytosis;CC:membrane;CC:plasma membrane;MF:GTPase activity;MF:GDP binding;MF:GTP binding;	K04353	RAP1A	map04530;map04510;map05211;map04015;map04014;map04010;map04024;map04972;map04062;map04670;map04722;map04611;map04720	Tight junction;Focal adhesion;Renal cell carcinoma;Rap1 signaling pathway;Ras signaling pathway;MAPK signaling pathway;cAMP signaling pathway;Pancreatic secretion;Chemokine signaling pathway;Leukocyte transendothelial migration;Neurotrophin signaling pathway;Platelet activation;Long-term potentiation	COG1100	S:Function unknown	sp|P08645|RAP1_DROME;	Ras-related protein Rap1 OS=Drosophila melanogaster OX=7227 GN=Rap1 PE=2 SV=2;	PF00071;PF08477;PF00025;PF00009;PF01926	Ras;Roc;Arf;GTP_EFTU;MMR_HSR1	Ras family;Ras of Complex, Roc, domain of DAPkinase;ADP-ribosylation factor family;Elongation factor Tu GTP binding domain;50S ribosome-binding GTPase
TRINITY_DN21902_c2_g4	-1.55666	0.00148938	0.00721374	down	-3.02109	1.0059e-10	3.15232e-09	down	gamma-tubulin complex component 2-like isoform X2 [Anoplophora glabripennis]	6.06	GO:0007020;GO:0051321;GO:0000278;GO:0031122;GO:0051415;GO:0051225;GO:0005737;GO:0005813;GO:0000923;GO:0008275;GO:0005815;GO:0000930;GO:0000922;GO:0005874;GO:0043015	BP:microtubule nucleation;BP:meiotic cell cycle;BP:mitotic cell cycle;BP:cytoplasmic microtubule organization;BP:interphase microtubule nucleation by interphase microtubule organizing center;BP:spindle assembly;CC:cytoplasm;CC:centrosome;CC:equatorial microtubule organizing center;CC:gamma-tubulin small complex;CC:microtubule organizing center;CC:gamma-tubulin complex;CC:spindle pole;CC:microtubu…	K16569	TUBGCP2, GCP2	------	------	ENOG410XNRE	S:Function unknown	sp|Q921G8|GCP2_MOUSE;	Gamma-tubulin complex component 2 OS=Mus musculus OX=10090 GN=Tubgcp2 PE=1 SV=2;	PF04130;PF17681	GCP_C_terminal;GCP_N_terminal	Gamma tubulin complex component C-terminal;Gamma tubulin complex component N-terminal
TRINITY_DN21909_c1_g1	3.77563	2.30724e-10	9.21088e-09	up	-1.94807	1.85804e-05	0.000155311	down	PREDICTED: uncharacterized protein LOC109543036 [Dendroctonus ponderosae] >ENN72539.1 hypothetical protein YQE_10879, partial [Dendroctonus ponderosae]	0.63	------	------	------	------	------	------	ENOG410Y2YK	S:Function unknown	------	------	------	------	------
TRINITY_DN21916_c1_g1	-3.84824	5.52274e-17	8.16713e-15	down	-4.02804	3.46748e-06	3.59541e-05	down	PREDICTED: ataxin-2-like protein isoform X1 [Dendroctonus ponderosae]	9.12	GO:0010603;GO:0034063;GO:0010494	BP:regulation of cytoplasmic mRNA processing body assembly;BP:stress granule assembly;CC:cytoplasmic stress granule;	------	------	------	------	COG5180	S:Function unknown	sp|Q8SWR8|ATX2_DROME;	Ataxin-2 homolog OS=Drosophila melanogaster OX=7227 GN=Atx2 PE=1 SV=1;	PF06741;PF14438;PF07145	LsmAD;SM-ATX;PAM2	LsmAD domain;Ataxin 2 SM domain;Ataxin-2 C-terminal region
TRINITY_DN21920_c0_g4	1.24998	0.000490694	0.0028976	up	2.36606	4.8141e-07	6.35342e-06	up	hypothetical protein YQE_10928, partial [Dendroctonus ponderosae]	22.79	GO:0000398;GO:0005634;GO:0045131;GO:0008270;GO:0003723	BP:mRNA splicing, via spliceosome;CC:nucleus;MF:pre-mRNA branch point binding;MF:zinc ion binding;MF:RNA binding;	K13095	SF1	------	------	COG5176	A:RNA processing and modification	sp|Q15637|SF01_HUMAN;	Splicing factor 1 OS=Homo sapiens OX=9606 GN=SF1 PE=1 SV=4;	PF16275;PF00013;PF00098	SF1-HH;KH_1;zf-CCHC	Splicing factor 1 helix-hairpin domain;KH domain;Zinc knuckle
TRINITY_DN21926_c1_g2	1.70874	0.00136653	0.00672651	up	-1.61317	0.000574401	0.00298816	down	hypothetical protein D910_08555 [Dendroctonus ponderosae]	8.22	GO:0006231;GO:0005829;GO:0005739;GO:0004799	BP:dTMP biosynthetic process;CC:cytosol;CC:mitochondrion;MF:thymidylate synthase activity;	K00560	thyA, TYMS	map00240;map01523;map00670	Pyrimidine metabolism;Antifolate resistance;One carbon pool by folate	COG0207	F:Nucleotide transport and metabolism	sp|P07607|TYSY_MOUSE;	Thymidylate synthase OS=Mus musculus OX=10090 GN=Tyms PE=1 SV=1;	PF00303	Thymidylat_synt	Thymidylate synthase
TRINITY_DN21933_c0_g1	-2.68675	1.25248e-05	0.000131541	down	3.30463	8.78085e-05	0.000594484	up	PREDICTED: protein Skeletor, isoforms B/C [Dendroctonus ponderosae]	13.32	GO:0030195;GO:0016021;GO:0005887;GO:0004888;GO:0008146	BP:negative regulation of blood coagulation;CC:integral component of membrane;CC:integral component of plasma membrane;MF:transmembrane signaling receptor activity;MF:sulfotransferase activity;	------	------	------	------	ENOG410XNZ2;ENOG410XSWZ	S:Function unknown;	sp|Q9VGY6|SKEL1_DROME;	Protein Skeletor, isoforms B/C OS=Drosophila melanogaster OX=7227 GN=Skeletor PE=1 SV=2;	PF10517;PF03351	DM13;DOMON	Electron transfer DM13;DOMON domain
TRINITY_DN21948_c0_g1	1.75495	0.00110619	0.0056568	up	2.86858	2.71476e-07	3.80296e-06	up	PREDICTED: uncharacterized protein LOC109535377 [Dendroctonus ponderosae] >XP_019756874.1 PREDICTED: uncharacterized protein LOC109535404 [Dendroctonus ponderosae]	19.33	------	------	------	------	------	------	------	------	------	------	------	------	------
TRINITY_DN21953_c0_g1	-1.70107	0.000449382	0.0026959	down	-2.13705	5.84082e-05	0.000418753	down	hypothetical protein YQE_02565, partial [Dendroctonus ponderosae]	35.89	GO:0000381;GO:0045292;GO:0005737;GO:0016607;GO:0005634;GO:0003723;GO:0008270	BP:regulation of alternative mRNA splicing, via spliceosome;BP:mRNA cis splicing, via spliceosome;CC:cytoplasm;CC:nuclear speck;CC:nucleus;MF:RNA binding;MF:zinc ion binding;	K12896	SFRS7	map05168;map03040	Herpes simplex infection;Spliceosome	ENOG4111N8Y;ENOG410XRW9	S:Function unknown;U:Intracellular trafficking, secretion, and vesicular transport	sp|Q3T106|SRSF7_BOVIN;	Serine/arginine-rich splicing factor 7 OS=Bos taurus OX=9913 GN=SRSF7 PE=2 SV=1;	PF00076	RRM_1	RNA recognition motif.
TRINITY_DN21969_c1_g2	5.6188	0.000150802	0.00107908	up	5.62607	4.37591e-05	0.000326164	up		0.06	------	------	------	------	------	------	------	------	------	------	------	------	------
TRINITY_DN21984_c1_g11	3.34216	0.000448666	0.00269278	up	5.47276	0.00189464	0.00814816	up	PREDICTED: probable E3 ubiquitin-protein ligase HERC4 [Dendroctonus ponderosae]	0.11	GO:0016021;GO:0004842	CC:integral component of membrane;MF:ubiquitin-protein transferase activity;	K10615	HERC4	map04120	Ubiquitin mediated proteolysis	COG5184;COG5021;COG5021	G:Carbohydrate transport and metabolism;D:Cell cycle control, cell division, chromosome partitioning;Z:Cytoskeleton	sp|Q5GLZ8|HERC4_HUMAN;	Probable E3 ubiquitin-protein ligase HERC4 OS=Homo sapiens OX=9606 GN=HERC4 PE=1 SV=1;	PF00632	HECT	HECT-domain
TRINITY_DN21985_c1_g4	-1.84015	1.439e-06	2.03502e-05	down	3.22437	0.00201238	0.00859373	up		17.96	------	------	------	------	------	------	------	------	------	------	------	------	------
TRINITY_DN21997_c0_g1	-5.70967	3.68084e-22	1.24994e-19	down	-4.70877	2.04026e-20	3.54404e-18	down	PREDICTED: uncharacterized protein LOC109535668 [Dendroctonus ponderosae] >ENN78756.1 hypothetical protein YQE_04780, partial [Dendroctonus ponderosae]	149.07	GO:0016787;GO:0004104	MF:hydrolase activity;MF:cholinesterase activity;	------	------	------	------	COG2272	I:Lipid transport and metabolism	sp|B2D0J5|EST6_APIME;	Venom carboxylesterase-6 OS=Apis mellifera OX=7460 PE=2 SV=1;	PF00135;PF07859;PF00326	COesterase;Abhydrolase_3;Peptidase_S9	Carboxylesterase family;alpha/beta hydrolase fold;Prolyl oligopeptidase family
TRINITY_DN22005_c1_g2	-3.68972	2.97277e-07	5.17199e-06	down	-1.8079	0.00227702	0.00949488	down	PREDICTED: uncharacterized protein LOC109537813, partial [Dendroctonus ponderosae]	21.2	GO:0023052	BP:signaling;	------	------	------	------	ENOG4111JKV	S:Function unknown	------	------	------	------	------
TRINITY_DN22014_c1_g1	2.47133	7.94566e-08	1.64822e-06	up	3.84745	1.74585e-14	1.16214e-12	up		10.89	------	------	------	------	------	------	------	------	------	------	------	------	------
TRINITY_DN22028_c0_g1	2.84796	0.000168525	0.00118584	up	-7.48752	1.55876e-07	2.32273e-06	down	hypothetical protein D910_09059 [Dendroctonus ponderosae]	1.97	GO:0005975;GO:0004553	BP:carbohydrate metabolic process;MF:hydrolase activity, hydrolyzing O-glycosyl compounds;	------	------	------	------	COG2723	G:Carbohydrate transport and metabolism	sp|Q95X01|MYRO1_BREBR;	Myrosinase 1 OS=Brevicoryne brassicae OX=69196 PE=1 SV=1;	PF00232;PF00150	Glyco_hydro_1;Cellulase	Glycosyl hydrolase family 1;Cellulase
TRINITY_DN22028_c0_g3	2.98417	2.04849e-05	0.000199602	up	-7.21664	6.97456e-09	1.47062e-07	down	unknown [Dendroctonus ponderosae]	0.45	GO:0005975;GO:0004553	BP:carbohydrate metabolic process;MF:hydrolase activity, hydrolyzing O-glycosyl compounds;	------	------	------	------	COG2723	G:Carbohydrate transport and metabolism	sp|Q95X01|MYRO1_BREBR;	Myrosinase 1 OS=Brevicoryne brassicae OX=69196 PE=1 SV=1;	PF00232;PF00150	Glyco_hydro_1;Cellulase	Glycosyl hydrolase family 1;Cellulase
TRINITY_DN22050_c0_g2	2.72452	1.86281e-05	0.000184046	up	5.39086	4.41047e-05	0.000328203	up	PREDICTED: RNA pseudouridylate synthase domain-containing protein 1-like [Dendroctonus ponderosae]	0.52	GO:0001522;GO:0003723;GO:0009982	BP:pseudouridine synthesis;MF:RNA binding;MF:pseudouridine synthase activity;	------	------	------	------	COG0564	J:Translation, ribosomal structure and biogenesis	sp|Q08C69|RUSD1_DANRE;	RNA pseudouridylate synthase domain-containing protein 1 OS=Danio rerio OX=7955 GN=rpusd1 PE=2 SV=1;	PF00849	PseudoU_synth_2	RNA pseudouridylate synthase
TRINITY_DN22051_c0_g3	-3.23702	7.06887e-05	0.000567531	down	-2.82694	3.73216e-05	0.000284102	down	PREDICTED: uncharacterized protein LOC109543998 isoform X1 [Dendroctonus ponderosae]	2.81	GO:0006997;GO:1902531;GO:0001525;GO:0005637;GO:0003676	BP:nucleus organization;BP:regulation of intracellular signal transduction;BP:angiogenesis;CC:nuclear inner membrane;MF:nucleic acid binding;	------	------	------	------	ENOG4112AST;ENOG4111M08;ENOG410ZNGY;ENOG4111H1J	S:Function unknown;	------	------	PF09588	YqaJ	YqaJ-like viral recombinase domain
TRINITY_DN22080_c0_g1	-3.01612	1.0747e-06	1.58162e-05	down	-1.69832	0.000901878	0.00436786	down		3.2	------	------	------	------	------	------	------	------	------	------	------	------	------
TRINITY_DN22103_c0_g1	-2.9595	2.78973e-14	2.59238e-12	down	-4.25379	3.7003e-14	2.23476e-12	down	cytochrome P450 CYP4G56v1 [Dendroctonus rhizophagus]	162.02	GO:0016021;GO:0005506;GO:0016705;GO:0004497;GO:0020037	CC:integral component of membrane;MF:iron ion binding;MF:oxidoreductase activity, acting on paired donors, with incorporation or reduction of molecular oxygen;MF:monooxygenase activity;MF:heme binding;	K15001	CYP4	------	------	COG2124	Q:Secondary metabolites biosynthesis, transport and catabolism	sp|Q9VYY4|C4G15_DROME;	Cytochrome P450 4g15 OS=Drosophila melanogaster OX=7227 GN=Cyp4g15 PE=2 SV=1;	PF00067	p450	Cytochrome P450
TRINITY_DN22124_c0_g2	-3.02755	5.96294e-07	9.45886e-06	down	2.6468	0.000426214	0.00232259	up	PREDICTED: glutaminase kidney isoform, mitochondrial isoform X1 [Dendroctonus ponderosae]	5.91	GO:0006537;GO:0006541;GO:0006543;GO:0004359	BP:glutamate biosynthetic process;BP:glutamine metabolic process;BP:glutamine catabolic process;MF:glutaminase activity;	K01425	glsA, GLS	map05206;map00220;map04964;map00471;map00250;map04727;map05230;map04724	MicroRNAs in cancer;Arginine biosynthesis;Proximal tubule bicarbonate reclamation;D-Glutamine and D-glutamate metabolism;Alanine, aspartate and glutamate metabolism;GABAergic synapse;Central carbon metabolism in cancer;Glutamatergic synapse	COG2066	E:Amino acid transport and metabolism	sp|D3Z7P3|GLSK_MOUSE;	Glutaminase kidney isoform, mitochondrial OS=Mus musculus OX=10090 GN=Gls PE=1 SV=1;	PF04960;PF17959;PF13637;PF12796;PF13857;PF00023;PF13606	Glutaminase;EF-hand_14;Ank_4;Ank_2;Ank_5;Ank;Ank_3	Glutaminase;EF-hand domain;Ankyrin repeats;Ankyrin repeats;Ankyrin repeats;Ankyrin repeat;Ankyrin repeat
TRINITY_DN22147_c0_g3	-2.41223	5.75334e-07	9.15896e-06	down	-1.35358	0.00239532	0.00988647	down	hypothetical protein YQE_06063, partial [Dendroctonus ponderosae]	5.7	GO:0051123;GO:0006325;GO:0006357;GO:0006367;GO:0006366;GO:0000124;GO:0005634;GO:0005669;GO:0046695;GO:0046982;GO:0003743	BP:RNA polymerase II transcriptional preinitiation complex assembly;BP:chromatin organization;BP:regulation of transcription from RNA polymerase II promoter;BP:transcription initiation from RNA polymerase II promoter;BP:transcription from RNA polymerase II promoter;CC:SAGA complex;CC:nucleus;CC:transcription factor TFIID complex;CC:SLI;MF:protein heterodimerization activity;MF:translation initiat…	K03131	TAF6	map03022;map05168	Basal transcription factors;Herpes simplex infection	COG5095	K:Transcription	sp|P49847|TAF6_DROME;	Transcription initiation factor TFIID subunit 6 OS=Drosophila melanogaster OX=7227 GN=Taf6 PE=1 SV=2;	PF07571;PF02969	TAF6_C;TAF	TAF6 C-terminal HEAT repeat domain;TATA box binding protein associated factor
TRINITY_DN22157_c0_g2	-3.30439	4.92629e-09	1.42634e-07	down	-3.10156	5.60395e-07	7.24896e-06	down	PREDICTED: RNA-binding protein fusilli isoform X1 [Dendroctonus ponderosae] >XP_019767497.1 PREDICTED: RNA-binding protein fusilli isoform X2 [Dendroctonus ponderosae]	15.25	GO:0003723	MF:RNA binding;	K14947	ESRP1_2	------	------	ENOG410XPZU	S:Function unknown	sp|Q9BJZ5|FUSIL_DROME;	RNA-binding protein fusilli OS=Drosophila melanogaster OX=7227 GN=fus PE=2 SV=1;	------	------	------
TRINITY_DN22161_c0_g1	1.27646	0.00131523	0.00652302	up	2.09525	2.8641e-11	1.01237e-09	up	PREDICTED: uncharacterized protein LOC109535202 [Dendroctonus ponderosae]	15.58	GO:0016021	CC:integral component of membrane;	------	------	------	------	ENOG4111QQ7	S:Function unknown	------	------	PF06653	Claudin_3	Tight junction protein, Claudin-like
TRINITY_DN22180_c1_g2	1.70261	8.29942e-05	0.000650438	up	6.5773	2.40164e-09	5.44819e-08	up		32.04	------	------	------	------	------	------	------	------	------	------	------	------	------
TRINITY_DN22192_c0_g1	-5.37591	3.12855e-11	1.50444e-09	down	-4.65479	7.95458e-17	8.15076e-15	down	PREDICTED: fibulin-2-like [Dendroctonus ponderosae] >XP_019753531.1 PREDICTED: fibulin-2-like [Dendroctonus ponderosae]	1.47	GO:0006030;GO:0030198;GO:0062023;GO:0005509;GO:0008061	BP:chitin metabolic process;BP:extracellular matrix organization;CC:collagen-containing extracellular matrix;MF:calcium ion binding;MF:chitin binding;	K17307	FBLN1_2	------	------	ENOG410Y194	O:Posttranslational modification, protein turnover, chaperones	sp|O73775|FBLN1_CHICK;	Fibulin-1 OS=Gallus gallus OX=9031 GN=FBLN1 PE=2 SV=2;	PF07645;PF12662;PF14670	EGF_CA;cEGF;FXa_inhibition	Calcium-binding EGF domain;Complement Clr-like EGF-like;Coagulation Factor Xa inhibitory site
TRINITY_DN22198_c0_g2	2.64395	0.000431594	0.00260841	up	5.14671	6.04977e-06	5.89433e-05	up	longitudinals lacking protein, isoforms F/I/K/T-like isoform X16 [Rhopalosiphum maidis]	5.36	------	------	------	------	------	------	ENOG410YPVD;COG5048	S:Function unknown;	------	------	PF00096;PF13894;PF12171;PF05605	zf-C2H2;zf-C2H2_4;zf-C2H2_jaz;zf-Di19	Zinc finger, C2H2 type;C2H2-type zinc finger;Zinc-finger double-stranded RNA-binding;Drought induced 19 protein
TRINITY_DN22205_c1_g5	-4.75312	4.47985e-09	1.30778e-07	down	-5.35448	1.17731e-06	1.39164e-05	down	hypothetical protein D910_11671 [Dendroctonus ponderosae]	11.8	GO:0016021;GO:0016747	CC:integral component of membrane;MF:transferase activity, transferring acyl groups other than amino-acyl groups;	------	------	------	------	ENOG410YD1T	S:Function unknown	sp|Q09225|NRF6_CAEEL;	Nose resistant to fluoxetine protein 6 OS=Caenorhabditis elegans OX=6239 GN=nrf-6 PE=1 SV=3;	PF01757	Acyl_transf_3	Acyltransferase family
TRINITY_DN22207_c1_g5	3.44007	0.000450498	0.00269937	up	6.48049	2.37219e-06	2.57998e-05	up		0.07	------	------	------	------	------	------	------	------	------	------	------	------	------
TRINITY_DN22238_c2_g1	-4.99138	1.46458e-12	9.28219e-11	down	4.9501	0.00121365	0.0056239	up	uncharacterized protein LOC112044210 [Bicyclus anynana]	7.02	GO:0003964;GO:0004519	MF:RNA-directed DNA polymerase activity;MF:endonuclease activity;	------	------	------	------	ENOG4111HHG;ENOG410Y65V;ENOG410ZU9B;ENOG4111T8J;ENOG4111Y55	S:Function unknown;	------	------	------	------	------
TRINITY_DN22243_c0_g1	-2.61248	8.07163e-15	7.95675e-13	down	-4.22102	9.43678e-13	4.42461e-11	down	PREDICTED: staphylococcal nuclease domain-containing protein 1 [Dendroctonus ponderosae]	30.09	GO:0031047;GO:0006401;GO:0005737;GO:0005634;GO:0016442;GO:0004518;GO:0004521;GO:0003723	BP:gene silencing by RNA;BP:RNA catabolic process;CC:cytoplasm;CC:nucleus;CC:RISC complex;MF:nuclease activity;MF:endoribonuclease activity;MF:RNA binding;	K15979	SND1	map05203	Viral carcinogenesis	COG1525	L:Replication, recombination and repair	sp|Q9W0S7|SND1_DROME;	Staphylococcal nuclease domain-containing protein 1 OS=Drosophila melanogaster OX=7227 GN=Tudor-SN PE=1 SV=1;	PF00565;PF00567	SNase;TUDOR	Staphylococcal nuclease homologue;Tudor domain
TRINITY_DN22250_c0_g1	4.52823	3.38986e-08	7.89514e-07	up	3.00569	6.62082e-05	0.000468232	up	PREDICTED: 15-hydroxyprostaglandin dehydrogenase [NA	0.47	GO:0005737;GO:0016021;GO:0016491	CC:cytoplasm;CC:integral component of membrane;MF:oxidoreductase activity;	K00069	HPGD	map05202	Transcriptional misregulation in cancer	COG1028	S:Function unknown	sp|O08699|PGDH_RAT;	15-hydroxyprostaglandin dehydrogenase [NA;	PF00106;PF13561	adh_short;adh_short_C2	short chain dehydrogenase;Enoyl
TRINITY_DN22268_c1_g4	2.19175	1.50595e-09	5.00273e-08	up	-1.58114	0.000509647	0.00270059	down	hypothetical protein D910_05689 [Dendroctonus ponderosae]	19.23	GO:0006468;GO:0065003;GO:0005634;GO:0005739;GO:0016592;GO:0004674;GO:0004672;GO:0004693;GO:0005524	BP:protein phosphorylation;BP:macromolecular complex assembly;CC:nucleus;CC:mitochondrion;CC:mediator complex;MF:protein serine/threonine kinase activity;MF:protein kinase activity;MF:cyclin-dependent protein serine/threonine kinase activity;MF:ATP binding;	K02208	CDK8_11	------	------	ENOG410XPPA	T:Signal transduction mechanisms	sp|Q17IE8|CDK8_AEDAE;	Cyclin-dependent kinase 8 OS=Aedes aegypti OX=7159 GN=Cdk8 PE=3 SV=2;	PF00069;PF07714	Pkinase;Pkinase_Tyr	Protein kinase domain;Protein tyrosine kinase
TRINITY_DN22275_c1_g1	-4.5422	4.21979e-06	5.15864e-05	down	-7.29494	2.81569e-07	3.93226e-06	down	PREDICTED: myrosinase 1-like [Dendroctonus ponderosae]	2.59	GO:0005975;GO:0004553	BP:carbohydrate metabolic process;MF:hydrolase activity, hydrolyzing O-glycosyl compounds;	K01229	LCT	map04973;map00052	Carbohydrate digestion and absorption;Galactose metabolism	COG2723	G:Carbohydrate transport and metabolism	sp|Q95X01|MYRO1_BREBR;	Myrosinase 1 OS=Brevicoryne brassicae OX=69196 PE=1 SV=1;	PF00232;PF00150	Glyco_hydro_1;Cellulase	Glycosyl hydrolase family 1;Cellulase
TRINITY_DN22276_c0_g1	1.6356	6.01123e-06	6.97952e-05	up	-1.65537	0.00121161	0.00561733	down	PREDICTED: uncharacterized protein LOC109536031 [Dendroctonus ponderosae]	4.9	------	------	------	------	------	------	ENOG410ZKBJ;ENOG410YIYS;ENOG410ZJIR	S:Function unknown;	------	------	------	------	------
TRINITY_DN22279_c4_g1	4.36324	0.00143424	0.00699099	up	5.51049	9.99651e-05	0.000664697	up		0.09	------	------	------	------	------	------	------	------	------	------	------	------	------
TRINITY_DN22281_c0_g3	1.68069	0.00032275	0.00203894	up	2.57177	0.000511232	0.00270742	up	PREDICTED: phytanoyl-CoA dioxygenase domain-containing protein 1 homolog [Dendroctonus ponderosae]	28.2	GO:0051213	MF:dioxygenase activity;	------	------	------	------	ENOG410XUSH	S:Function unknown	sp|Q0IIB1|PHYD1_BOVIN;	Phytanoyl-CoA dioxygenase domain-containing protein 1 OS=Bos taurus OX=9913 GN=PHYHD1 PE=2 SV=1;	PF05721	PhyH	Phytanoyl-CoA dioxygenase
TRINITY_DN22284_c0_g1	4.02558	2.41356e-07	4.31087e-06	up	3.35569	3.20967e-06	3.35479e-05	up		0.72	------	------	------	------	------	------	------	------	------	------	------	------	------
TRINITY_DN22286_c0_g2	-3.61433	0.000213098	0.00144088	down	-4.0968	3.36324e-05	0.000260476	down	PREDICTED: UDP-glucuronosyltransferase 2B19-like isoform X2 [Dendroctonus ponderosae]	5.25	GO:0016021;GO:0016758;GO:0016740	CC:integral component of membrane;MF:transferase activity, transferring hexosyl groups;MF:transferase activity;	K00699	UGT	map05204;map00983;map00982;map00980;map00040;map00860;map00053;map00830;map00140	Chemical carcinogenesis;Drug metabolism - other enzymes;Drug metabolism - cytochrome P450;Metabolism of xenobiotics by cytochrome P450;Pentose and glucuronate interconversions;Porphyrin and chlorophyll metabolism;Ascorbate and aldarate metabolism;Retinol metabolism;Steroid hormone biosynthesis	COG1819	S:Function unknown	sp|Q88168|UDPE_NPVSL;	Ecdysteroid UDP-glucosyltransferase OS=Spodoptera littoralis nuclear polyhedrosis virus OX=10456 GN=EGT PE=3 SV=1;	PF00201	UDPGT	UDP-glucoronosyl and UDP-glucosyl transferase
TRINITY_DN22319_c0_g1	-7.01532	7.62519e-29	5.66861e-26	down	-8.65336	2.09411e-10	5.98659e-09	down	PREDICTED: myrosinase 1-like [Dendroctonus ponderosae] >AEE62454.1 unknown [Dendroctonus ponderosae]	15.12	GO:0005975;GO:0004553	BP:carbohydrate metabolic process;MF:hydrolase activity, hydrolyzing O-glycosyl compounds;	------	------	------	------	COG2723	G:Carbohydrate transport and metabolism	sp|Q95X01|MYRO1_BREBR;	Myrosinase 1 OS=Brevicoryne brassicae OX=69196 PE=1 SV=1;	PF00232;PF00150	Glyco_hydro_1;Cellulase	Glycosyl hydrolase family 1;Cellulase
TRINITY_DN22323_c0_g1	-2.39751	1.8181e-06	2.48059e-05	down	-2.02447	1.13908e-05	0.000102952	down	PREDICTED: bromodomain-containing protein 3-like isoform X5 [Dendroctonus ponderosae]	13.23	------	------	------	------	------	------	ENOG410XYFJ	S:Function unknown	------	------	------	------	------
TRINITY_DN22328_c0_g2	1.89189	1.07399e-05	0.000115081	up	-1.1758	4.54641e-08	7.72086e-07	down	PREDICTED: N-glycosylase/DNA lyase [Dendroctonus ponderosae]	6.65	GO:0006284;GO:0006285;GO:0032509;GO:0006289;GO:0006364;GO:0015031;GO:0043328;GO:0000813;GO:0005634;GO:0016829;GO:0008534;GO:0003684;GO:0034039	BP:base-excision repair;BP:base-excision repair, AP site formation;BP:endosome transport via multivesicular body sorting pathway;BP:nucleotide-excision repair;BP:rRNA processing;BP:protein transport;BP:protein targeting to vacuole involved in ubiquitin-dependent protein catabolic process via the multivesicular body sorting pathway;CC:ESCRT I complex;CC:nucleus;MF:lyase activity;MF:oxidized purine…	K03660;K12184	OGG1;VPS28	map04144;map03410	Endocytosis;Base excision repair	COG0122;ENOG4111IQ4	L:Replication, recombination and repair;U:Intracellular trafficking, secretion, and vesicular transport	sp|Q9V359|VPS28_DROME;	Vacuolar protein sorting-associated protein 28 homolog OS=Drosophila melanogaster OX=7227 GN=Vps28 PE=1 SV=1;	PF07934;PF00730	OGG_N;HhH-GPD	8-oxoguanine DNA glycosylase, N-terminal domain;HhH-GPD superfamily base excision DNA repair protein
TRINITY_DN22347_c0_g2	-1.94871	7.8017e-07	1.20288e-05	down	-1.50413	3.29992e-06	3.44124e-05	down	PREDICTED: uncharacterized protein LOC109539842 isoform X1 [Dendroctonus ponderosae]	24.15	GO:0071900;GO:0016301;GO:0032559	BP:regulation of protein serine/threonine kinase activity;MF:kinase activity;MF:adenyl ribonucleotide binding;	K07200	PRKAG	map04068;map04213;map04921;map04920;map04710;map04922;map04152;map04910;map04211;map04932;map04530;map05410;map04931	FoxO signaling pathway;Longevity regulating pathway - multiple species;Oxytocin signaling pathway;Adipocytokine signaling pathway;Circadian rhythm;Glucagon signaling pathway;AMPK signaling pathway;Insulin signaling pathway;Longevity regulating pathway;Non-alcoholic fatty liver diseas;Tight junction;Hypertrophic cardiomyopath;Insulin resistance	ENOG410ZN05;COG0517;ENOG4112CU5	S:Function unknown;	------	------	------	------	------
TRINITY_DN22359_c2_g1	3.23774	0.00189913	0.00883084	up	5.06585	0.000255088	0.0014936	up	hypothetical protein YQE_09779, partial [Dendroctonus ponderosae] >ERL89448.1 hypothetical protein D910_06815 [Dendroctonus ponderosae]	0.06	GO:0003676	MF:nucleic acid binding;	------	------	------	------	ENOG410YPVD;ENOG4111M67;ENOG410ZB5X	S:Function unknown;	sp|Q7KQZ4|LOLA3_DROME;	Longitudinals lacking protein, isoforms A/B/D/L OS=Drosophila melanogaster OX=7227 GN=lola PE=1 SV=1;	------	------	------
TRINITY_DN22362_c0_g1	1.56143	0.000787911	0.00429111	up	2.80936	3.99034e-28	2.20545e-25	up	PREDICTED: N	24.34	------	------	K13358	SLC9A3R2, NHERF2	map04960	Aldosterone-regulated sodium reabsorption	ENOG4111P3W	T:Signal transduction mechanisms	sp|Q5ZM14|NHRF1_CHICK;	N;	PF17820;PF00595;PF13180	PDZ_6;PDZ;PDZ_2	PDZ domain;PDZ domain;PDZ domain
TRINITY_DN22373_c0_g1	-5.31349	1.6169e-26	9.2655e-24	down	-5.79464	4.80331e-08	8.14196e-07	down	PREDICTED: uncharacterized protein LOC109542841 [Dendroctonus ponderosae] >ENN72588.1 hypothetical protein YQE_10689, partial [Dendroctonus ponderosae] >ERL84814.1 hypothetical protein D910_02238 [Dendroctonus ponderosae]	1702.79	------	------	------	------	------	------	------	------	------	------	------	------	------
TRINITY_DN22377_c1_g1	-2.88394	1.14823e-07	2.28038e-06	down	-4.0461	2.82693e-05	0.000224928	down	PREDICTED: probable low-specificity L-threonine aldolase 2 isoform X2 [Dendroctonus ponderosae] >AEE61991.1 unknown [Dendroctonus ponderosae] >ENN70507.1 hypothetical protein YQE_12683, partial [Dendroctonus ponderosae]	20.11	GO:0006567;GO:0006545;GO:0006520;GO:0005829;GO:0008408;GO:0008732;GO:0016829;GO:0000166;GO:0003676	BP:threonine catabolic process;BP:glycine biosynthetic process;BP:cellular amino acid metabolic process;CC:cytosol;MF:3'-5' exonuclease activity;MF:L-allo-threonine aldolase activity;MF:lyase activity;MF:nucleotide binding;MF:nucleic acid binding;	K01620	ltaE	map00260	Glycine, serine and threonine metabolism	COG2008	E:Amino acid transport and metabolism	sp|Q9FPH3|THA2_ARATH;	Probable low-specificity L-threonine aldolase 2 OS=Arabidopsis thaliana OX=3702 GN=THA2 PE=1 SV=1;	PF01212;PF00155;PF01041;PF00266;PF01053	Beta_elim_lyase;Aminotran_1_2;DegT_DnrJ_EryC1;Aminotran_5;Cys_Met_Meta_PP	Beta-eliminating lyase;Aminotransferase class I and II;DegT/DnrJ/EryC1/StrS aminotransferase family;Aminotransferase class-V;Cys/Met metabolism PLP-dependent enzyme
TRINITY_DN22401_c0_g1	-1.81914	9.47517e-07	1.4234e-05	down	-1.21963	0.000311675	0.00177645	down	PREDICTED: isocitrate dehydrogenase [NAD] subunit beta, mitochondrial [Dendroctonus ponderosae] >ENN70365.1 hypothetical protein YQE_12872, partial [Dendroctonus ponderosae]	103.03	GO:0006099;GO:0006102;GO:0005739;GO:0051287;GO:0000287;GO:0004449	BP:tricarboxylic acid cycle;BP:isocitrate metabolic process;CC:mitochondrion;MF:NAD binding;MF:magnesium ion binding;MF:isocitrate dehydrogenas;	K00030	IDH3	map00020	Citrate cycl	COG0473	E:Amino acid transport and metabolism	sp|O77784|IDH3B_BOVIN;	Isocitrate dehydrogenase [NAD] subunit beta, mitochondrial OS=Bos taurus OX=9913 GN=IDH3B PE=2 SV=2;	PF00180	Iso_dh	Isocitrate/isopropylmalate dehydrogenase
TRINITY_DN22402_c0_g1	2.08879	3.1712e-07	5.46193e-06	up	-1.66414	1.44062e-09	3.42575e-08	down	unknown [Dendroctonus ponderosae] >ERL85798.1 hypothetical protein D910_03213 [Dendroctonus ponderosae]	27.53	GO:0019521;GO:0046177;GO:0006098;GO:0009051;GO:0005829;GO:0050661;GO:0004616	BP:D-gluconate metabolic process;BP:D-gluconate catabolic process;BP:pentose-phosphate shunt;BP:pentose-phosphate shunt, oxidative branch;CC:cytosol;MF:NADP binding;MF:phosphogluconate dehydrogenas;	K00033	PGD, gnd, gntZ	map00480;map00030	Glutathione metabolism;Pentose phosphate pathway	COG0362	G:Carbohydrate transport and metabolism	sp|P41572|6PGD_DROME;	6-phosphogluconate dehydrogenase, decarboxylating OS=Drosophila melanogaster OX=7227 GN=Pgd PE=2 SV=1;	PF00393;PF03446;PF14833	6PGD;NAD_binding_2;NAD_binding_11	6-phosphogluconate dehydrogenase, C-terminal domain;NAD binding domain of 6-phosphogluconate dehydrogenase;NAD-binding of NADP-dependent 3-hydroxyisobutyrate dehydrogenase
TRINITY_DN22405_c0_g1	-6.07164	5.05667e-17	7.60048e-15	down	-7.68547	1.04347e-26	4.75796e-24	down	hypothetical protein D910_07935 [Dendroctonus ponderosae]	183.28	GO:0005975;GO:0030246;GO:0004553	BP:carbohydrate metabolic process;MF:carbohydrate binding;MF:hydrolase activity, hydrolyzing O-glycosyl compounds;	K05546	GANAB	map00510;map04141	N-Glycan biosynthesis;Protein processing in endoplasmic reticulum	COG1501	G:Carbohydrate transport and metabolism	sp|Q8BHN3|GANAB_MOUSE;	Neutral alpha-glucosidase AB OS=Mus musculus OX=10090 GN=Ganab PE=1 SV=1;	PF01055;PF13802;PF17137	Glyco_hydro_31;Gal_mutarotas_2;DUF5110	Glycosyl hydrolases family 31;Galactose mutarotase-like;Domain of unknown function
TRINITY_DN22431_c0_g3	1.64086	0.000136546	0.000992558	up	1.54573	8.4333e-06	7.92044e-05	up	PREDICTED: uncharacterized protein LOC109537669 isoform X2 [Dendroctonus ponderosae]	11.54	------	------	------	------	------	------	------	------	------	------	PF13837;PF12776	Myb_DNA-bind_4;Myb_DNA-bind_3	Myb/SANT-like DNA-binding domain;Myb/SANT-like DNA-binding domain
TRINITY_DN22432_c1_g3	-1.20165	0.00150373	0.00726791	down	1.67948	7.77294e-06	7.38005e-05	up	PREDICTED: stress-activated protein kinase JNK isoform X2 [Dendroctonus ponderosae]	32.55	GO:0004707;GO:0005524	MF:MAP kinase activity;MF:ATP binding;	K04440	JNK	map05166;map05142;map04657;map05145;map04750;map04391;map04014;map04659;map04658;map04010;map04013;map04012;map04212;map04071;map04210;map04310;map04214;map05160;map05161;map04622;map04920;map04620;map04621;map05131;map04215;map04624;map04380;map05164;map04723;map04722;map04141;map04140;map05152;map04664;map04917;map04510;map05133;map05212;map05200;map04728;map05132;map04668;map04068;map01522;map…	HTLV-I infection;Chagas diseas;IL-17 signaling pathway;Toxoplasmosis;Inflammatory mediator regulation of TRP channels;Hippo signaling pathway - fly;Ras signaling pathway;Th17 cell differentiation;Th1 and Th2 cell differentiation;MAPK signaling pathway;MAPK signaling pathway - fly;ErbB signaling pathway;Longevity regulating pathway - worm;Sphingolipid signaling pathway;Apoptosis;Wnt signaling path…	ENOG410XSHI	T:Signal transduction mechanisms	sp|P92208|JNK_DROME;	Stress-activated protein kinase JNK OS=Drosophila melanogaster OX=7227 GN=bsk PE=1 SV=1;	PF00069;PF07714;PF06293;PF14531;PF01636;PF01163	Pkinase;Pkinase_Tyr;Kdo;Kinase-like;APH;RIO1	Protein kinase domain;Protein tyrosine kinase;Lipopolysaccharide kinase;Kinase-like;Phosphotransferase enzyme family;RIO1 family
TRINITY_DN22432_c1_g6	-3.35549	0.000771723	0.00421756	down	-2.68534	1.49339e-05	0.000128907	down	hypothetical protein YQE_11638, partial [Dendroctonus ponderosae]	1.62	------	------	------	------	------	------	------	------	------	------	------	------	------
TRINITY_DN22432_c1_g9	-2.57724	0.00174521	0.00822688	down	4.62482	0.00224441	0.00937817	up		2.68	------	------	------	------	------	------	------	------	------	------	------	------	------
TRINITY_DN22439_c0_g5	5.78528	3.69452e-35	4.83912e-32	up	-3.37172	2.74119e-05	0.000219216	down	PREDICTED: uncharacterized protein LOC109544687 [Dendroctonus ponderosae] >ENN71288.1 hypothetical protein YQE_12213, partial [Dendroctonus ponderosae]	23.22	------	------	------	------	------	------	------	------	------	------	------	------	------
TRINITY_DN22443_c2_g2	-1.82298	2.17545e-07	3.94709e-06	down	1.30556	1.711e-05	0.000145216	up	PREDICTED: probable NADH dehydrogenase [ubiquinone] 1 alpha subcomplex subunit 12 [Dendroctonus ponderosae] >ENN77598.1 hypothetical protein YQE_05893, partial [Dendroctonus ponderosae]	101.21	GO:0006979;GO:0005743;GO:0005747;GO:0070469;GO:0008137;GO:0009055	BP:response to oxidative stress;CC:mitochondrial inner membrane;CC:mitochondrial respiratory chain complex I;CC:respiratory chain;MF:NADH dehydrogenas;MF:electron carrier activity;	K18160;K11352	NDUFAF2;NDUFA12	map00190;map05012;map05010;map04723;map05016;map04932	Oxidative phosphorylation;Parkinson's disease;Alzheimer's disease;Retrograde endocannabinoid signaling;Huntington's disease;Non-alcoholic fatty liver diseas	ENOG4111XVR	I:Lipid transport and metabolism	sp|Q9N2W7|NDUAC_CAEEL;	Probable NADH dehydrogenase [ubiquinone] 1 alpha subcomplex subunit 12 OS=Caenorhabditis elegans OX=6239 GN=Y94H6A.8 PE=3 SV=2;	PF05071	NDUFA12	NADH ubiquinone oxidoreductase subunit NDUFA12
TRINITY_DN22454_c2_g7	1.39862	0.000450231	0.00269913	up	7.33297	7.046e-14	4.00349e-12	up		10.56	------	------	------	------	------	------	------	------	------	------	------	------	------
TRINITY_DN22463_c2_g6	1.97001	0.000663977	0.00371433	up	6.76617	6.58156e-10	1.66724e-08	up		8.18	------	------	------	------	------	------	------	------	------	------	------	------	------
TRINITY_DN22473_c1_g7	2.09097	1.7186e-07	3.23336e-06	up	2.99822	2.77078e-08	4.97894e-07	up		19.19	------	------	------	------	------	------	------	------	------	------	------	------	------
TRINITY_DN22478_c0_g1	6.4617	3.26347e-05	0.000297137	up	4.8161	0.000230785	0.00137424	up	PREDICTED: cytochrome P450 4C1-like isoform X3 [Dendroctonus ponderosae] >XP_019773545.1 PREDICTED: cytochrome P450 4C1-like isoform X3 [Dendroctonus ponderosae] >XP_019773546.1 PREDICTED: cytochrome P450 4C1-like isoform X3 [Dendroctonus ponderosae] >ENN81467.1 hypothetical protein YQE_02159, partial [Dendroctonus ponderosae]	0	GO:0016021;GO:0005506;GO:0016705;GO:0004497;GO:0020037	CC:integral component of membrane;MF:iron ion binding;MF:oxidoreductase activity, acting on paired donors, with incorporation or reduction of molecular oxygen;MF:monooxygenase activity;MF:heme binding;	------	------	------	------	------	------	------	------	PF00067	p450	Cytochrome P450
TRINITY_DN22480_c1_g1	-1.55281	0.00191039	0.00886575	down	-2.75835	2.88905e-11	1.01732e-09	down	PREDICTED: lysosomal thioesterase PPT2 homolog [Dendroctonus ponderosae] >AEE61897.1 unknown [Dendroctonus ponderosae] >ENN80889.1 hypothetical protein YQE_02678, partial [Dendroctonus ponderosae] >ERL85730.1 hypothetical protein D910_03145 [Dendroctonus ponderosae]	17.76	GO:0005764;GO:0008474	CC:lysosome;MF:palmitoyl;	K01074	PPT	map04142;map00062	Lysosome;Fatty acid elongation	COG1075	S:Function unknown	sp|Q9VKH6|PPT2_DROME;	Lysosomal thioesterase PPT2 homolog OS=Drosophila melanogaster OX=7227 GN=Ppt2 PE=2 SV=1;	PF02089	Palm_thioest	Palmitoyl protein thioesterase
TRINITY_DN22495_c1_g2	2.12143	1.10562e-05	0.000118102	up	3.15835	8.32222e-11	2.6583e-09	up	hypothetical protein D910_10049 [Dendroctonus ponderosae]	4.7	GO:0006348;GO:0006338;GO:0046020;GO:0005634;GO:0000781;GO:0046872	BP:chromatin silencing at telomere;BP:chromatin remodeling;BP:negative regulation of transcription from RNA polymerase II promoter by pheromones;CC:nucleus;CC:chromosome, telomeric region;MF:metal ion binding;	K11655	BAZ1A, ACF1	------	------	COG5076;COG5076	B:Chromatin structure and dynamics;K:Transcription	sp|Q03330|GCN5_YEAST;	Histone acetyltransferase GCN5 OS=Saccharomyces cerevisiae;	PF00439	Bromodomain	Bromodomain
TRINITY_DN22497_c1_g2	-1.28343	0.000620523	0.0035163	down	-1.8312	4.06888e-06	4.139e-05	down	PREDICTED: uncharacterized protein LOC109545239 [Dendroctonus ponderosae] >ENN70493.1 hypothetical protein YQE_12669, partial [Dendroctonus ponderosae]	38.23	GO:0016021;GO:0005802;GO:0005537	CC:integral component of membrane;CC:trans-Golgi network;MF:mannose binding;	------	------	------	------	ENOG4112253	S:Function unknown	------	------	PF02157;PF09451	Man-6-P_recep;ATG27	Mannose-6-phosphate receptor;Autophagy-related protein 27
TRINITY_DN22516_c1_g1	-2.51011	9.50303e-06	0.000103933	down	-2.41612	0.000502221	0.00266744	down	carbohydrate sulfotransferase 5 [Anoplophora glabripennis]	4.83	GO:0006790;GO:0006044;GO:0016021;GO:0001517;GO:0008146	BP:sulfur compound metabolic process;BP:N-acetylglucosamine metabolic process;CC:integral component of membrane;MF:N-acetylglucosamine 6-O-sulfotransferase activity;MF:sulfotransferase activity;	------	------	------	------	ENOG4110V0B	S:Function unknown	sp|O88199|CHST3_MOUSE;	Carbohydrate sulfotransferase 3 OS=Mus musculus OX=10090 GN=Chst3 PE=2 SV=1;	PF00685;PF13469	Sulfotransfer_1;Sulfotransfer_3	Sulfotransferase domain;Sulfotransferase family
TRINITY_DN22520_c0_g1	1.76812	0.00047768	0.00283376	up	2.46501	0.000146885	0.000928284	up	PREDICTED: prolyl 3-hydroxylase 1-like isoform X2 [Dendroctonus ponderosae] >ENN80243.1 hypothetical protein YQE_03238, partial [Dendroctonus ponderosae] >ERL94851.1 hypothetical protein D910_12124 [Dendroctonus ponderosae]	14.36	GO:0032963;GO:0031418;GO:0005506;GO:0016705	BP:collagen metabolic process;MF:L-ascorbic acid binding;MF:iron ion binding;MF:oxidoreductase activity, acting on paired donors, with incorporation or reduction of molecular oxygen;	K08134	P3H1	------	------	ENOG410XPXF;ENOG410Y7XP	O:Posttranslational modification, protein turnover, chaperones;	sp|Q6JHU8|P3H1_CHICK;	Prolyl 3-hydroxylase 1 OS=Gallus gallus OX=9031 GN=P3H1 PE=1 SV=1;	------	------	------
TRINITY_DN22520_c0_g3	4.32821	7.35025e-09	2.02784e-07	up	7.32135	4.528e-07	6.00191e-06	up	hypothetical protein YQE_03237, partial [Dendroctonus ponderosae] >ERL94852.1 hypothetical protein D910_12125 [Dendroctonus ponderosae]	0.71	GO:0032963;GO:0016705;GO:0031418;GO:0005506;GO:0019797	BP:collagen metabolic process;MF:oxidoreductase activity, acting on paired donors, with incorporation or reduction of molecular oxygen;MF:L-ascorbic acid binding;MF:iron ion binding;MF:procollagen-proline 3-dioxygenase activity;	K08134	P3H1	------	------	ENOG410XPXF;ENOG410XSBB	O:Posttranslational modification, protein turnover, chaperones;S:Function unknown	sp|Q6JHU7|P3H2_CHICK;	Prolyl 3-hydroxylase 2 OS=Gallus gallus OX=9031 GN=P3H2 PE=2 SV=1;	PF13640	2OG-FeII_Oxy_3	2OG-F
TRINITY_DN22523_c2_g1	1.74518	4.49708e-07	7.41143e-06	up	-1.89781	1.07658e-09	2.62509e-08	down	PREDICTED: septin-7 [Dendroctonus ponderosae] >ENN73136.1 hypothetical protein YQE_10277, partial [Dendroctonus ponderosae] >ERL85492.1 hypothetical protein D910_02911 [Dendroctonus ponderosae]	10.74	GO:0060271;GO:0061640;GO:0031105;GO:0015630;GO:0005940;GO:0003924;GO:0005525	BP:cilium assembly;BP:cytoskeleton-dependent cytokinesis;CC:septin complex;CC:microtubule cytoskeleton;CC:septin ring;MF:GTPase activity;MF:GTP binding;	K16944	SEPT7, CDC3	------	------	COG5019;COG5019	D:Cell cycle control, cell division, chromosome partitioning;Z:Cytoskeleton	sp|P40797|PNUT_DROME;	Protein peanut OS=Drosophila melanogaster OX=7227 GN=pnut PE=1 SV=2;	PF00735;PF01926;PF03193	Septin;MMR_HSR1;RsgA_GTPase	Septin;50S ribosome-binding GTPase;RsgA GTPase
TRINITY_DN22525_c1_g1	1.67143	0.000338081	0.00211635	up	1.85833	5.18236e-06	5.13981e-05	up	hypothetical protein D910_05522 [Dendroctonus ponderosae]	14.94	GO:0000387;GO:0033962;GO:0000398;GO:0000956;GO:0000932;GO:0005688;GO:0005681;GO:0003723;GO:0017070	BP:spliceosomal snRNP assembly;BP:cytoplasmic mRNA processing body assembly;BP:mRNA splicing, via spliceosome;BP:nuclear-transcribed mRNA catabolic process;CC:cytoplasmic mRNA processing body;CC:U6 snRNP;CC:spliceosomal complex;MF:RNA binding;MF:U6 snRNA binding;	K12623	LSM4	map03018;map03040	RNA degradation;Spliceosome	ENOG4111TZU	K:Transcription	sp|Q3ZBK6|LSM4_BOVIN;	U6 snRNA-associated Sm-like protein LSm4 OS=Bos taurus OX=9913 GN=LSM4 PE=2 SV=1;	PF01423	LSM	LSM domain
TRINITY_DN22531_c0_g1	-2.20316	1.29924e-05	0.000135573	down	-2.62016	0.000132208	0.000845196	down	hypothetical protein YQE_09776, partial [Dendroctonus ponderosae]	7.63	GO:0006629;GO:0010025;GO:0035336;GO:0016021;GO:0005777;GO:0080019;GO:0102965	BP:lipid metabolic process;BP:wax biosynthetic process;BP:long-chain fatty-acyl-CoA metabolic process;CC:integral component of membrane;CC:peroxisome;MF:fatty-acyl-CoA reductas;MF:alcohol-forming fatty acyl-CoA reductase activity;	K13356	FAR	map04146;map04212	Peroxisome;Longevity regulating pathway - worm	ENOG410XS7R	O:Posttranslational modification, protein turnover, chaperones	sp|A1ZAI5|FACR1_DROME;	Putative fatty acyl-CoA reductase CG5065 OS=Drosophila melanogaster OX=7227 GN=CG5065 PE=3 SV=1;	PF07993;PF03015;PF01370;PF01073;PF02719	NAD_binding_4;Sterile;Epimerase;3Beta_HSD;Polysacc_synt_2	Male sterility protein;Male sterility protein;NAD dependent epimerase/dehydratase family;3-beta hydroxysteroid dehydrogenase/isomerase family;Polysaccharide biosynthesis protein
TRINITY_DN22533_c0_g1	-2.05904	0.00165279	0.00785854	down	2.02946	6.11242e-05	0.000436338	up	PREDICTED: ankyrin repeat domain-containing protein 6 [Dendroctonus ponderosae] >XP_019770471.1 PREDICTED: ankyrin repeat domain-containing protein 6 [Dendroctonus ponderosae]	6.81	------	------	K21435	ANKRD6	------	------	COG0666	S:Function unknown	------	------	PF12796;PF13637;PF13857;PF00023;PF13606	Ank_2;Ank_4;Ank_5;Ank;Ank_3	Ankyrin repeats;Ankyrin repeats;Ankyrin repeats;Ankyrin repeat;Ankyrin repeat
TRINITY_DN22537_c0_g1	2.93231	2.91192e-16	3.81406e-14	up	4.88468	9.01069e-10	2.23296e-08	up		9.63	------	------	------	------	------	------	------	------	------	------	------	------	------
TRINITY_DN22559_c1_g2	1.04861	0.0018071	0.00847456	up	-1.63791	6.1249e-09	1.29898e-07	down	hypothetical protein D910_05260 [Dendroctonus ponderosae]	23.12	GO:0000226;GO:0007018;GO:0005868;GO:0045504;GO:0003777	BP:microtubule cytoskeleton organization;BP:microtubule-based movement;CC:cytoplasmic dynein complex;MF:dynein heavy chain binding;MF:microtubule motor activity;	K10416	DYNC1LI, DNCLI	map04145;map04962;map05132	Phagosome;Vasopressin-regulated water reabsorption;Salmonella infection	ENOG410XQS4	Z:Cytoskeleton	sp|Q5RE09|DC1L2_PONAB;	Cytoplasmic dynein 1 light intermediate chain 2 OS=Pongo abelii OX=9601 GN=DYNC1LI2 PE=2 SV=1;	PF05783	DLIC	Dynein light intermediate chain
TRINITY_DN22576_c0_g1	-1.72636	2.67562e-05	0.000249646	down	-1.55994	3.12004e-07	4.33408e-06	down	PREDICTED: NADH dehydrogenase [ubiquinone] flavoprotein 1, mitochondrial [Dendroctonus ponderosae] >AEE61949.1 unknown [Dendroctonus ponderosae] >ENN72318.1 hypothetical protein YQE_11061, partial [Dendroctonus ponderosae] >ERL85747.1 hypothetical protein D910_03162 [Dendroctonus ponderosae]	146.93	GO:0006120;GO:0045333;GO:0005739;GO:0005743;GO:0005747;GO:0070469;GO:0051539;GO:0051287;GO:0010181;GO:0008137;GO:0046872	BP:mitochondrial electron transport, NADH to ubiquinone;BP:cellular respiration;CC:mitochondrion;CC:mitochondrial inner membrane;CC:mitochondrial respiratory chain complex I;CC:respiratory chain;MF:4 iron, 4 sulfur cluster binding;MF:NAD binding;MF:FMN binding;MF:NADH dehydrogenas;MF:metal ion binding;	K03942	NDUFV1	map00190;map05012;map05010;map04723;map05016;map04932	Oxidative phosphorylation;Parkinson's disease;Alzheimer's disease;Retrograde endocannabinoid signaling;Huntington's disease;Non-alcoholic fatty liver diseas	COG1894	C:Energy production and conversion	sp|P25708|NDUV1_BOVIN;	NADH dehydrogenase [ubiquinone] flavoprotein 1, mitochondrial OS=Bos taurus OX=9913 GN=NDUFV1 PE=1 SV=2;	PF01512;PF10531	Complex1_51K;SLBB	Respiratory-chain NADH dehydrogenase 51 Kd subunit;SLBB domain
TRINITY_DN22588_c1_g1	-1.43366	0.000616575	0.00349897	down	3.49157	1.19768e-12	5.5443e-11	up	hypothetical protein YQE_09168, partial [Dendroctonus ponderosae] >ERL86176.1 hypothetical protein D910_03589 [Dendroctonus ponderosae]	98.81	GO:0007411;GO:0016477;GO:0016021;GO:0009986	BP:axon guidance;BP:cell migration;CC:integral component of membrane;CC:cell surface;	K16336	SDC2, CD362	map04514;map05205;map05144;map05418	Cell adhesion molecule;Proteoglycans in cancer;Malaria;Fluid shear stress and atherosclerosis	ENOG4111QSA	U:Intracellular trafficking, secretion, and vesicular transport	sp|P34741|SDC2_HUMAN;	Syndecan-2 OS=Homo sapiens OX=9606 GN=SDC2 PE=1 SV=2;	PF01034	Syndecan	Syndecan domain
TRINITY_DN22589_c1_g3	-1.68881	2.664e-07	4.70222e-06	down	3.27336	2.50696e-06	2.70558e-05	up		38.87	------	------	------	------	------	------	------	------	------	------	------	------	------
TRINITY_DN22589_c1_g4	4.56176	2.33563e-08	5.72583e-07	up	7.79541	2.32516e-06	2.53488e-05	up	hypothetical protein EVAR_48550_1 [Eumeta japonica]	0.1	------	------	------	------	------	------	ENOG410ZMSE	S:Function unknown	------	------	------	------	------
TRINITY_DN22610_c0_g2	-1.77191	5.95829e-07	9.45694e-06	down	-1.84733	5.46374e-05	0.000395533	down	PREDICTED: glyceraldehyde-3-phosphate dehydrogenase 2 isoform X1 [Dendroctonus ponderosae] >XP_019770427.1 PREDICTED: glyceraldehyde-3-phosphate dehydrogenase 2 isoform X2 [Dendroctonus ponderosae] >XP_019770428.1 PREDICTED: glyceraldehyde-3-phosphate dehydrogenase 2 isoform X3 [Dendroctonus ponderosae] >ENN71096.1 hypothetical protein YQE_12029, partial [Dendroctonus ponderosae] >ERL84769.1 hypo…	700.27	GO:0006006;GO:0006096;GO:0051287;GO:0004365;GO:0050661	BP:glucose metabolic process;BP:glycolytic process;MF:NAD binding;MF:glyceraldehyde-3-phosphate dehydrogenas;MF:NADP binding;	K00134	GAPDH, gapA	map00010;map05010;map04066	Glycolysis / Gluconeogenesis;Alzheimer's disease;HIF-1 signaling pathway	COG0057	G:Carbohydrate transport and metabolism	sp|O44104|G3P2_DROPS;	Glyceraldehyde-3-phosphate dehydrogenase 2 OS=Drosophila pseudoobscura pseudoobscura OX=46245 GN=Gapdh2 PE=2 SV=2;	PF02800;PF00044	Gp_dh_C;Gp_dh_N	Glyceraldehyde 3-phosphate dehydrogenase, C-terminal domain;Glyceraldehyde 3-phosphate dehydrogenase, NAD binding domain
TRINITY_DN22611_c0_g1	-3.8982	3.22337e-09	9.78609e-08	down	-5.46126	7.33023e-10	1.83901e-08	down	PREDICTED: gonadotropin-releasing hormone II receptor-like [Dendroctonus ponderosae] >ERL88626.1 hypothetical protein D910_06011 [Dendroctonus ponderosae]	20.9	GO:0032870;GO:0007186;GO:0016021;GO:0005887;GO:0005886;GO:0004930;GO:0097003;GO:0005000	BP:cellular response to hormone stimulus;BP:G-protein coupled receptor signaling pathway;CC:integral component of membrane;CC:integral component of plasma membrane;CC:plasma membrane;MF:G-protein coupled receptor activity;MF:adipokinetic hormone receptor activity;MF:vasopressin receptor activity;	K04280	GNRHR	map04080;map04912	Neuroactive ligand-receptor interaction;GnRH signaling pathway	ENOG410XRW9	U:Intracellular trafficking, secretion, and vesicular transport	sp|O42329|GNRR2_CLAGA;	Gonadotropin-releasing hormone II receptor OS=Clarias gariepinus OX=13013 PE=2 SV=2;	PF00001;PF10320;PF13853	7tm_1;7TM_GPCR_Srsx;7tm_4	7 transmembrane receptor;Serpentine type 7TM GPCR chemoreceptor Srsx;Olfactory receptor
TRINITY_DN22614_c1_g2	2.57832	0.000235096	0.00156502	up	3.21693	8.97781e-05	0.000605346	up		3.65	------	------	------	------	------	------	------	------	------	------	------	------	------
TRINITY_DN22636_c0_g1	1.73709	5.35199e-05	0.000450189	up	-1.32897	1.11857e-16	1.11484e-14	down	hypothetical protein YQE_07146, partial [Dendroctonus ponderosae] >ERL93454.1 hypothetical protein D910_10745, partial [Dendroctonus ponderosae]	26.06	GO:0001732;GO:0005852;GO:0016282;GO:0005829;GO:0033290;GO:0042788;GO:0008237;GO:0003743	BP:formation of cytoplasmic translation initiation complex;CC:eukaryotic translation initiation factor 3 complex;CC:eukaryotic 43S preinitiation complex;CC:cytosol;CC:eukaryotic 48S preinitiation complex;CC:polysomal ribosome;MF:metallopeptidase activity;MF:translation initiation factor activity;	K06237;K03247	COL4A;EIF3H	map04510;map05146;map04512;map05200;map04974;map04933;map03013;map05162;map04151;map05222	Focal adhesion;Amoebiasis;ECM-receptor interaction;Pathways in cancer;Protein digestion and absorption;AGE-RAGE signaling pathway in diabetic complications;RNA transport;Measles;PI3K-Akt signaling pathway;Small cell lung cancer	ENOG410XSR9	J:Translation, ribosomal structure and biogenesis	sp|Q9GV27|EIF3H_BOMMO;	Eukaryotic translation initiation factor 3 subunit H OS=Bombyx mori OX=7091 PE=2 SV=1;	PF01398	JAB	JAB1/Mov34/MPN/PAD-1 ubiquitin protease
TRINITY_DN22647_c0_g1	-3.52195	1.55041e-05	0.000157131	down	-6.16578	7.3239e-05	0.000508491	down	PREDICTED: beta-galactosidase-1-like protein 3 [Dendroctonus ponderosae]	1.82	GO:0005975;GO:0016051;GO:0005773;GO:0004565	BP:carbohydrate metabolic process;BP:carbohydrate biosynthetic process;CC:vacuole;MF:beta-galactosidase activity;	------	------	------	------	COG1874	G:Carbohydrate transport and metabolism	sp|Q8IW92|GLBL2_HUMAN;	Beta-galactosidase-1-like protein 2 OS=Homo sapiens OX=9606 GN=GLB1L2 PE=2 SV=1;	PF01301;PF02449	Glyco_hydro_35;Glyco_hydro_42	Glycosyl hydrolases family 35;Beta-galactosidase
TRINITY_DN22678_c0_g1	2.49963	0.000755392	0.00413983	up	4.16191	7.55489e-05	0.000521947	up		5.82	------	------	------	------	------	------	------	------	------	------	------	------	------
TRINITY_DN22684_c0_g1	-4.8989	4.36048e-28	2.99848e-25	down	-7.25916	1.1875e-28	8.02176e-26	down	PREDICTED: facilitated trehalose transporter Tret1 [Dendroctonus ponderosae] >ENN70298.1 hypothetical protein YQE_12809, partial [Dendroctonus ponderosae]	29.44	GO:0008643;GO:0016021;GO:0005887;GO:0022857;GO:0005351	BP:carbohydrate transport;CC:integral component of membrane;CC:integral component of plasma membrane;MF:transmembrane transporter activity;MF:suga;	K08145	SLC2A8, GLUT8	------	------	ENOG410XNQK	G:Carbohydrate transport and metabolism	sp|Q17NV8|TRET1_AEDAE;	Facilitated trehalose transporter Tret1 OS=Aedes aegypti OX=7159 GN=Tret1 PE=3 SV=1;	PF00083;PF07690	Sugar_tr;MFS_1	Sugar;Major Facilitator Superfamily
TRINITY_DN22688_c0_g5	-3.30063	5.44835e-08	1.17909e-06	down	-4.27296	0.000148197	0.000935279	down	PREDICTED: uncharacterized protein LOC109542095 [Dendroctonus ponderosae] >ENN73341.1 hypothetical protein YQE_10101, partial [Dendroctonus ponderosae] >ERL90070.1 hypothetical protein D910_07425 [Dendroctonus ponderosae]	1223.2	------	------	------	------	------	------	ENOG410XPJ1	O:Posttranslational modification, protein turnover, chaperones	------	------	------	------	------
TRINITY_DN22700_c3_g1	-3.07678	0.000108756	0.00082025	down	-7.12747	3.80489e-16	3.38524e-14	down	PREDICTED: endoglucanase-like [Dendroctonus ponderosae] >ENN70547.1 hypothetical protein YQE_12722, partial [Dendroctonus ponderosae] >ERL84419.1 hypothetical protein D910_01852 [Dendroctonus ponderosae]	44.63	GO:0005975;GO:0008810	BP:carbohydrate metabolic process;MF:cellulase activity;	------	------	------	------	ENOG410Z8DT	G:Carbohydrate transport and metabolism	sp|O97401|GUN_PHACE;	Endoglucanase OS=Phaedon cochleariae OX=80249 PE=2 SV=1;	PF02015	Glyco_hydro_45	Glycosyl hydrolase family 45
TRINITY_DN22700_c3_g2	-3.12468	6.9975e-07	1.09547e-05	down	-6.5818	1.84897e-06	2.07273e-05	down	PREDICTED: endoglucanase-like [Dendroctonus ponderosae] >ENN70549.1 hypothetical protein YQE_12724, partial [Dendroctonus ponderosae]	148.7	GO:0005975;GO:0008810	BP:carbohydrate metabolic process;MF:cellulase activity;	------	------	------	------	ENOG410Z8DT	G:Carbohydrate transport and metabolism	sp|O97401|GUN_PHACE;	Endoglucanase OS=Phaedon cochleariae OX=80249 PE=2 SV=1;	PF02015	Glyco_hydro_45	Glycosyl hydrolase family 45
TRINITY_DN22714_c1_g1	1.40466	1.77866e-05	0.000177003	up	2.6173	4.51388e-09	9.81271e-08	up	hypothetical protein D910_09981 [Dendroctonus ponderosae]	13.66	GO:0070084;GO:0004177;GO:0046872;GO:0008235;GO:0070006	BP:protein initiator methionine removal;MF:aminopeptidase activity;MF:metal ion binding;MF:metalloexopeptidase activity;MF:metalloaminopeptidase activity;	K01265	map	------	------	COG0024	O:Posttranslational modification, protein turnover, chaperones	sp|Q4VBS4|MAP12_DANRE;	Methionine aminopeptidase 1D, mitochondrial OS=Danio rerio OX=7955 GN=metap1d PE=2 SV=1;	PF00557	Peptidase_M24	Metallopeptidase family M24
TRINITY_DN22716_c0_g1	-2.43487	2.85212e-08	6.83366e-07	down	-1.4029	9.54717e-09	1.95214e-07	down	PREDICTED: threonine--tRNA ligase, cytoplasmic isoform X1 [Dendroctonus ponderosae]	30.17	GO:0006435;GO:0005737;GO:0004829;GO:0005524	BP:threonyl-tRNA aminoacylation;CC:cytoplasm;MF:threonine-tRNA ligase activity;MF:ATP binding;	K01868	TARS, thrS	map00970	Aminoacyl-tRNA biosynthesis	COG0441	J:Translation, ribosomal structure and biogenesis	sp|Q5XHY5|SYTC_RAT;	Threonine--tRNA ligase, cytoplasmic OS=Rattus norvegicus OX=10116 GN=Tars PE=1 SV=1;	PF00587;PF03129;PF02824;PF07973	tRNA-synt_2b;HGTP_anticodon;TGS;tRNA_SAD	tRNA synthetase class II core domain;Anticodon binding domain;TGS domain;Threonyl and Alanyl tRNA synthetase second additional domain
TRINITY_DN22718_c1_g1	3.59964	0.000772591	0.00422147	up	5.8401	0.000146617	0.000926915	up		0.02	------	------	------	------	------	------	------	------	------	------	------	------	------
TRINITY_DN22734_c0_g1	-1.48977	5.35031e-05	0.000450185	down	-3.21561	1.16309e-15	9.42827e-14	down	hypothetical protein YQE_03727, partial [Dendroctonus ponderosae]	18.9	GO:0006885;GO:0006506;GO:0005789;GO:0016021;GO:0015385	BP:regulation of pH;BP:GPI anchor biosynthetic process;CC:endoplasmic reticulum membrane;CC:integral component of membrane;MF:sodiu;	K14724	SLC9A8, NHE8	------	------	COG0025	P:Inorganic ion transport and metabolism	sp|Q9Y2E8|SL9A8_HUMAN;	Sodium/hydrogen exchanger 8 OS=Homo sapiens OX=9606 GN=SLC9A8 PE=1 SV=4;	PF00999	Na_H_Exchanger	Sodium/hydrogen exchanger family
TRINITY_DN22745_c0_g1	-4.48365	6.82693e-23	2.50375e-20	down	-4.25686	3.05349e-05	0.000239951	down	PREDICTED: uncharacterized protein LOC109545682 [Dendroctonus ponderosae]	64.59	GO:0034453;GO:0005856;GO:0036064;GO:0031514;GO:0005814;GO:0005879;GO:0036126;GO:0008017	BP:microtubule anchoring;CC:cytoskeleton;CC:ciliary basal body;CC:motile cilium;CC:centriole;CC:axonemal microtubule;CC:sperm flagellum;MF:microtubule binding;	------	------	------	------	ENOG410XS0C	S:Function unknown	------	------	------	------	------
TRINITY_DN22746_c0_g1	-2.97449	1.39266e-11	7.2413e-10	down	-3.76168	1.9439e-05	0.000161305	down	PREDICTED: juvenile hormone epoxide hydrolase 1-like [Dendroctonus ponderosae]	31.9	GO:0046854;GO:0019439;GO:0048015;GO:0016021;GO:0005789;GO:0016787;GO:0033961;GO:0035091;GO:0016301;GO:0003824	BP:phosphatidylinositol phosphorylation;BP:aromatic compound catabolic process;BP:phosphatidylinositol-mediated signaling;CC:integral component of membrane;CC:endoplasmic reticulum membrane;MF:hydrolase activity;MF:cis-stilbene-oxide hydrolase activity;MF:phosphatidylinositol binding;MF:kinase activity;MF:catalytic activity;	K10719	JHEH	map00981	Insect hormone biosynthesis	COG0596	S:Function unknown	sp|Q8MZR6|HYEP1_CTEFE;	Juvenile hormone epoxide hydrolase 1 OS=Ctenocephalides felis OX=7515 GN=EH1 PE=1 SV=3;	PF06441;PF00561	EHN;Abhydrolase_1	Epoxide hydrolase N terminus;alpha/beta hydrolase fold
TRINITY_DN22747_c0_g1	3.85267	0.000231791	0.00154621	up	4.94834	0.000942652	0.00452272	up		0.17	------	------	------	------	------	------	------	------	------	------	------	------	------
TRINITY_DN22758_c0_g1	1.54527	3.83362e-06	4.74716e-05	up	-2.7092	1.32007e-10	4.0195e-09	down	PREDICTED: peptidyl-prolyl cis-trans isomerase FKBP8 [Dendroctonus ponderosae] >XP_019771997.1 PREDICTED: peptidyl-prolyl cis-trans isomerase FKBP8 [Dendroctonus ponderosae] >AEE62217.1 unknown [Dendroctonus ponderosae]	43.79	GO:0006457;GO:0016021;GO:0016853;GO:0003755	BP:protein folding;CC:integral component of membrane;MF:isomerase activity;MF:peptidyl-prolyl cis-trans isomerase activity;	K09574	FKBP8	------	------	COG0545	O:Posttranslational modification, protein turnover, chaperones	sp|O35465|FKBP8_MOUSE;	Peptidyl-prolyl cis-trans isomerase FKBP8 OS=Mus musculus OX=10090 GN=Fkbp8 PE=1 SV=2;	PF00254;PF18023	FKBP_C;FKBP_N_2	FKBP-type peptidyl-prolyl cis-trans isomerase;BDBT FKBP like N-terminal
TRINITY_DN22762_c0_g1	-3.08213	7.35008e-07	1.1435e-05	down	-3.32712	6.0653e-07	7.77953e-06	down	hypothetical protein D910_02370 [Dendroctonus ponderosae]	5.08	GO:0019878;GO:0016021;GO:0008897;GO:0000287	BP:lysine biosynthetic process via aminoadipic acid;CC:integral component of membrane;MF:holo-[acyl-carrier-protein] synthase activity;MF:magnesium ion binding;	K06133	LYS5, acpT	map00770	Pantothenate and CoA biosynthesis	COG2091	H:Coenzyme transport and metabolism	sp|Q9NRN7|ADPPT_HUMAN;	L-aminoadipate-semialdehyde dehydrogenase-phosphopantetheinyl transferase OS=Homo sapiens OX=9606 GN=AASDHPPT PE=1 SV=2;	PF01648	ACPS	4'-phosphopantetheinyl transferase superfamily
TRINITY_DN22771_c0_g2	-2.64762	9.72366e-10	3.41582e-08	down	-3.18374	3.02393e-07	4.21341e-06	down	PREDICTED: ras GTPase-activating protein-binding protein 2-like [Dendroctonus ponderosae]	60.98	GO:0005829;GO:1990904;GO:0003723;GO:0003729	CC:cytosol;CC:ribonucleoprotein complex;MF:RNA binding;MF:mRNA binding;	------	------	------	------	ENOG410YV57	S:Function unknown	sp|Q9UN86|G3BP2_HUMAN;	Ras GTPase-activating protein-binding protein 2 OS=Homo sapiens OX=9606 GN=G3BP2 PE=1 SV=2;	PF02136;PF00076;PF16367	NTF2;RRM_1;RRM_7	Nuclear transport factor 2;RNA recognition motif.;RNA recognition motif
TRINITY_DN22779_c0_g3	-3.68724	5.22799e-07	8.43903e-06	down	-4.35555	1.31494e-07	1.99516e-06	down	PREDICTED: lysosomal alpha-mannosidase-like [Dendroctonus ponderosae]	68.56	GO:0006013;GO:0006517;GO:0005774;GO:0030246;GO:0046872;GO:0004559	BP:mannose metabolic process;BP:protein deglycosylation;CC:vacuolar membrane;MF:carbohydrate binding;MF:metal ion binding;MF:alpha-mannosidase activity;	K12311	MAN2B1, LAMAN	map00511;map04142	Other glycan degradation;Lysosome	ENOG410XQMZ	G:Carbohydrate transport and metabolism	sp|Q29451|MA2B1_BOVIN;	Lysosomal alpha-mannosidase OS=Bos taurus OX=9913 GN=MAN2B1 PE=1 SV=4;	PF01074;PF09261;PF07748;PF17677	Glyco_hydro_38N;Alpha-mann_mid;Glyco_hydro_38C;Glyco_hydro38C2	Glycosyl hydrolases family 38 N-terminal domain;Alpha mannosidase middle domain;Glycosyl hydrolases family 38 C-terminal domain;Glycosyl hydrolases family 38 C-terminal beta sandwich domain
TRINITY_DN22783_c1_g1	-2.40733	8.03687e-05	0.000633598	down	-6.57655	5.25442e-08	8.80031e-07	down	PREDICTED: beta-1,3-glucan-binding protein-like [Dendroctonus ponderosae] >ENN78830.1 hypothetical protein YQE_04713, partial [Dendroctonus ponderosae]	23.54	GO:0005975;GO:0004553	BP:carbohydrate metabolic process;MF:hydrolase activity, hydrolyzing O-glycosyl compounds;	------	------	------	------	COG2273	G:Carbohydrate transport and metabolism	sp|Q8N0N3|BGBP_PENMO;	Beta-1,3-glucan-binding protein OS=Penaeus monodon OX=6687 PE=2 SV=1;	PF00722	Glyco_hydro_16	Glycosyl hydrolases family 16
TRINITY_DN22783_c1_g4	-3.39575	5.73134e-09	1.62522e-07	down	-7.90086	2.41393e-20	4.07664e-18	down	hypothetical protein D910_11194, partial [Dendroctonus ponderosae]	77.4	GO:0005975;GO:0004553	BP:carbohydrate metabolic process;MF:hydrolase activity, hydrolyzing O-glycosyl compounds;	------	------	------	------	COG2273	G:Carbohydrate transport and metabolism	sp|Q8N0N3|BGBP_PENMO;	Beta-1,3-glucan-binding protein OS=Penaeus monodon OX=6687 PE=2 SV=1;	PF00722	Glyco_hydro_16	Glycosyl hydrolases family 16
TRINITY_DN22799_c0_g3	-3.1181	2.8375e-07	4.95545e-06	down	-4.66665	7.78423e-13	3.7016e-11	down	PREDICTED: probable leucine--tRNA ligase, mitochondrial isoform X1 [Dendroctonus ponderosae]	4.94	GO:0006429;GO:0032543;GO:0005739;GO:0004823;GO:0002161;GO:0005524	BP:leucyl-tRNA aminoacylation;BP:mitochondrial translation;CC:mitochondrion;MF:leucine-tRNA ligase activity;MF:aminoacyl-tRNA editing activity;MF:ATP binding;	K01869	LARS, leuS	map00970	Aminoacyl-tRNA biosynthesis	COG0495	J:Translation, ribosomal structure and biogenesis	sp|Q8VDC0|SYLM_MOUSE;	Probable leucine--tRNA ligase, mitochondrial OS=Mus musculus OX=10090 GN=Lars2 PE=1 SV=1;	PF00133;PF09334;PF13603;PF08264	tRNA-synt_1;tRNA-synt_1g;tRNA-synt_1_2;Anticodon_1	tRNA synthetases class I;tRNA synthetases class I;Leucyl-tRNA synthetase, Domain 2;Anticodon-binding domain of tRNA
TRINITY_DN22805_c0_g2	-1.58626	2.37185e-05	0.000225433	down	1.75582	0.000197605	0.00120138	up	PREDICTED: beta-centractin-like [Dendroctonus ponderosae] >XP_019761240.1 PREDICTED: beta-centractin-like [Dendroctonus ponderosae] >ENN76426.1 hypothetical protein YQE_07087, partial [Dendroctonus ponderosae] >ENN83141.1 hypothetical protein YQE_00495, partial [Dendroctonus ponderosae] >ERL94089.1 hypothetical protein D910_11371 [Dendroctonus ponderosae]	32.77	GO:0030473;GO:0000132;GO:0005737;GO:0005856;GO:0005869;GO:0005813;GO:0099738;GO:0005524	BP:nuclear migration along microtubule;BP:establishment of mitotic spindle orientation;CC:cytoplasm;CC:cytoskeleton;CC:dynactin complex;CC:centrosome;CC:cell cortex region;MF:ATP binding;	K16575	ACTR1, ARP1	------	------	COG5277	E:Amino acid transport and metabolism	sp|A4IFE3|ACTY_BOVIN;	Beta-centractin OS=Bos taurus OX=9913 GN=ACTR1B PE=2 SV=1;	PF00022	Actin	Actin
TRINITY_DN22828_c3_g1	4.06374	5.41857e-07	8.70579e-06	up	-7.21069	5.69445e-09	1.22002e-07	down	PREDICTED: flocculation protein FLO11-like [Dendroctonus ponderosae] >ENN83381.1 hypothetical protein YQE_00260, partial [Dendroctonus ponderosae]	1.14	GO:0006030;GO:0005576;GO:0008061	BP:chitin metabolic process;CC:extracellular region;MF:chitin binding;	------	------	------	------	ENOG41126RR;ENOG4112A9I	S:Function unknown;	------	------	PF01607	CBM_14	Chitin binding Peritrophin-A domain
TRINITY_DN22833_c0_g1	-2.72883	1.77583e-05	0.00017685	down	-3.23261	1.3867e-07	2.08508e-06	down	PREDICTED: facilitated trehalose transporter Tret1-2 homolog [Dendroctonus ponderosae]	29.9	GO:0016021;GO:0005887;GO:0022857;GO:0005351	CC:integral component of membrane;CC:integral component of plasma membrane;MF:transmembrane transporter activity;MF:suga;	K08145	SLC2A8, GLUT8	------	------	ENOG410XNQK	G:Carbohydrate transport and metabolism	sp|B4KR05|TRET1_DROMO;	Facilitated trehalose transporter Tret1 OS=Drosophila mojavensis OX=7230 GN=Tret1 PE=3 SV=2;	PF00083;PF07690	Sugar_tr;MFS_1	Sugar;Major Facilitator Superfamily
TRINITY_DN22858_c0_g1	-1.73522	0.000110353	0.000830416	down	-5.83882	8.19025e-10	2.04353e-08	down	unknown [Dendroctonus ponderosae]	16.94	GO:0042545;GO:0045490;GO:0030599;GO:0045330	BP:cell wall modification;BP:pectin catabolic process;MF:pectinesterase activity;MF:aspartyl esterase activity;	K01051	E3.1.1.11	map00040	Pentose and glucuronate interconversions	COG4677	G:Carbohydrate transport and metabolism	sp|Q47474|PMEB_DICD3;	Pectinesterase B OS=Dickeya dadantii;	PF01095	Pectinesterase	Pectinesterase
TRINITY_DN22861_c0_g1	1.68395	0.000516525	0.00302417	up	-1.60877	0.000537598	0.00282654	down	hypothetical protein D910_08597 [Dendroctonus ponderosae]	9.41	GO:0000184;GO:0006457;GO:0000122;GO:0001709;GO:0045596;GO:0005634;GO:0043565;GO:0003700;GO:0003755	BP:nuclear-transcribed mRNA catabolic process, nonsense-mediated decay;BP:protein folding;BP:negative regulation of transcription from RNA polymerase II promoter;BP:cell fate determination;BP:negative regulation of cell differentiation;CC:nucleus;MF:sequence-specific DNA binding;MF:transcription factor activity, sequence-specific DNA binding;MF:peptidyl-prolyl cis-trans isomerase activity;	------	------	------	------	COG0652	U:Intracellular trafficking, secretion, and vesicular transport	sp|P21568|CYPH_SOLLC;	Peptidyl-prolyl cis-trans isomerase OS=Solanum lycopersicum OX=4081 GN=CYP PE=2 SV=1;	------	------	------
TRINITY_DN22887_c0_g2	1.93572	9.7728e-05	0.000749194	up	5.23688	1.71595e-11	6.29722e-10	up		3	------	------	------	------	------	------	------	------	------	------	------	------	------
TRINITY_DN22897_c2_g2	2.08932	0.000788422	0.00429262	up	4.63051	3.24717e-08	5.72224e-07	up	hypothetical protein D910_06826 [Dendroctonus ponderosae]	2.17	GO:0003676	MF:nucleic acid binding;	------	------	------	------	ENOG410YPVD;ENOG4111M67	S:Function unknown;	sp|Q7KQZ4|LOLA3_DROME;	Longitudinals lacking protein, isoforms A/B/D/L OS=Drosophila melanogaster OX=7227 GN=lola PE=1 SV=1;	PF00096	zf-C2H2	Zinc finger, C2H2 type
TRINITY_DN22907_c0_g3	1.91885	4.03111e-05	0.000354474	up	1.30857	0.000183006	0.00112385	up	longitudinals lacking protein, isoforms H/M/V isoform X32 [Leptinotarsa decemlineata]	1.61	GO:0003676	MF:nucleic acid binding;	------	------	------	------	------	------	------	------	PF00096;PF13894	zf-C2H2;zf-C2H2_4	Zinc finger, C2H2 type;C2H2-type zinc finger
TRINITY_DN22907_c0_g4	2.01009	0.00132425	0.00655246	up	2.95151	0.000145581	0.000921325	up	longitudinals lacking protein, isoforms A/B/D/L isoform X30 [Leptinotarsa decemlineata]	0.59	GO:0003676	MF:nucleic acid binding;	------	------	------	------	ENOG410YPVD;COG5048	S:Function unknown;	------	------	PF00096	zf-C2H2	Zinc finger, C2H2 type
TRINITY_DN22932_c0_g3	-3.85808	4.59955e-05	0.000395607	down	-6.28622	9.61042e-07	1.16391e-05	down	hypothetical protein YQE_06404, partial [Dendroctonus ponderosae]	12.28	GO:0003964;GO:0004519	MF:RNA-directed DNA polymerase activity;MF:endonuclease activity;	------	------	------	------	ENOG410ZN2U;ENOG410XRZC;ENOG410Y65V;ENOG410ZHEX;ENOG41117J4;ENOG410YTY7;ENOG410ZMR5	S:Function unknown;K:Transcription;S:Function unknown;S:Function unknown;S:Function unknown;S:Function unknown;S:Function unknown	------	------	PF00078	RVT_1	Reverse transcriptase
TRINITY_DN22934_c1_g1	4.87407	1.26539e-08	3.31168e-07	up	5.1731	0.000922157	0.00444911	up		0.08	------	------	------	------	------	------	------	------	------	------	------	------	------
TRINITY_DN22937_c0_g1	5.03298	1.52173e-15	1.8278e-13	up	6.04321	1.99747e-11	7.22856e-10	up	PREDICTED: pseudouridine-5'-phosphatase-like isoform X1 [Dendroctonus ponderosae] >ENN81499.1 hypothetical protein YQE_02028, partial [Dendroctonus ponderosae]	0.55	GO:0016787;GO:0000287	MF:hydrolase activity;MF:magnesium ion binding;	K17623	HDHD1	------	------	COG0637	S:Function unknown	sp|Q08623|HDHD1_HUMAN;	Pseudouridine-5'-phosphatase OS=Homo sapiens OX=9606 GN=PUDP PE=1 SV=3;	PF12710;PF13419	HAD;HAD_2	haloacid dehalogenase-like hydrolase;Haloacid dehalogenase-like hydrolase
TRINITY_DN22943_c0_g1	1.74103	0.000421609	0.00255717	up	2.71002	0.000976691	0.00466088	up	PREDICTED: centromere protein J [Dendroctonus ponderosae]	1.88	GO:0060271;GO:0061511;GO:0007099;GO:0005813;GO:0005634;GO:0005814;GO:0015631;GO:0004222;GO:0008270	BP:cilium assembly;BP:centriole elongation;BP:centriole replication;CC:centrosome;CC:nucleus;CC:centriole;MF:tubulin binding;MF:metalloendopeptidase activity;MF:zinc ion binding;	K11502	CENPJ	------	------	ENOG4110DC4	S:Function unknown	sp|Q569L8|CENPJ_MOUSE;	Centromere protein J OS=Mus musculus OX=10090 GN=Cenpj PE=2 SV=2;	PF07202	Tcp10_C	T-complex protein 10 C-terminus
TRINITY_DN22945_c0_g1	-1.50808	0.000505697	0.00297216	down	1.60458	4.02469e-05	0.000302707	up	PREDICTED: protein eva-1 [Dendroctonus ponderosae]	37.14	GO:0016021;GO:0030246	CC:integral component of membrane;MF:carbohydrate binding;	------	------	------	------	ENOG410ZQJC;ENOG4111MND;ENOG4111BWI	S:Function unknown;	sp|P58659|EVA1C_MOUSE;	Protein eva-1 homolog C OS=Mus musculus OX=10090 GN=Eva1c PE=2 SV=2;	PF02140	Gal_Lectin	Galactose binding lectin domain
TRINITY_DN22963_c0_g1	-3.67927	5.18262e-12	2.9152e-10	down	-5.67909	2.32883e-05	0.000189453	down	PREDICTED: maltase 2-like isoform X2 [Dendroctonus ponderosae]	39.28	GO:0005975;GO:0003824;GO:0016491	BP:carbohydrate metabolic process;MF:catalytic activity;MF:oxidoreductase activity;	K01187	malZ	map00500;map00052	Starch and sucrose metabolism;Galactose metabolism	COG0366	G:Carbohydrate transport and metabolism	sp|O16099|MAL2_DROVI;	Maltase 2 OS=Drosophila virilis OX=7244 GN=Mal-B2 PE=3 SV=2;	PF00128	Alpha-amylase	Alpha amylase, catalytic domain
TRINITY_DN22983_c0_g1	-2.30762	0.00073245	0.00403824	down	-4.25281	1.95238e-14	1.27916e-12	down	hypothetical protein D910_05546 [Dendroctonus ponderosae]	3.75	GO:0016021	CC:integral component of membrane;	K14209	SLC36A, PAT	------	------	COG0814	E:Amino acid transport and metabolism	sp|Q9W056|C1139_DROME;	Proton-coupled amino acid transporter-like protein CG1139 OS=Drosophila melanogaster OX=7227 GN=CG1139 PE=2 SV=1;	PF01490	Aa_trans	Transmembrane amino acid transporter protein
TRINITY_DN22995_c0_g2	-1.97927	7.04887e-06	8.04173e-05	down	-1.98771	5.79185e-06	5.66982e-05	down	hypothetical protein YQE_08144, partial [Dendroctonus ponderosae]	145.19	GO:0004687;GO:0005524;GO:0004672	MF:myosin light chain kinase activity;MF:ATP binding;MF:protein kinase activity;	K00907	MYLK	map04510;map04810;map04971;map04270;map04921;map04020;map04022;map04611	Focal adhesion;Regulation of actin cytoskeleton;Gastric acid secretion;Vascular smooth muscle contraction;Oxytocin signaling pathway;Calcium signaling pathway;cGMP-PKG signaling pathway;Platelet activation	ENOG410XRMJ	T:Signal transduction mechanisms	sp|Q15746|MYLK_HUMAN;	Myosin light chain kinase, smooth muscle OS=Homo sapiens OX=9606 GN=MYLK PE=1 SV=4;	------	------	------
TRINITY_DN23001_c0_g1	3.63708	0.000237518	0.00157959	up	8.83565	3.36334e-11	1.17069e-09	up	PREDICTED: cilia- and flagella-associated protein 206-like [Dendroctonus ponderosae]	0.1	------	------	------	------	------	------	ENOG410XS92	S:Function unknown	sp|Q29RL1|CF206_BOVIN;	Cilia- and flagella-associated protein 206 OS=Bos taurus OX=9913 GN=CFAP206 PE=2 SV=2;	PF12018	FAP206	Domain of unknown function
TRINITY_DN23019_c1_g1	-1.72342	9.46221e-05	0.000727791	down	2.17658	0.00232403	0.00964299	up	PREDICTED: biotin--protein ligase [Dendroctonus ponderosae]	2.61	GO:0006464;GO:0004077	BP:cellular protein modification process;MF:biotin-[acetyl-CoA-carboxylase] ligase activity;	K01942	HLCS	map00780	Biotin metabolism	COG0340	H:Coenzyme transport and metabolism	sp|P50747|BPL1_HUMAN;	Biotin--protein ligase OS=Homo sapiens OX=9606 GN=HLCS PE=1 SV=1;	PF03099	BPL_LplA_LipB	Biotin/lipoate A/B protein ligase family
TRINITY_DN23033_c0_g1	-2.06076	0.000236268	0.00157203	down	2.8525	0.000718031	0.00360612	up	PREDICTED: uncharacterized protein LOC109535470 [Dendroctonus ponderosae]	7.22	------	------	------	------	------	------	ENOG410ZHRH	S:Function unknown	------	------	PF16033	DUF4789	Domain of unknown function
TRINITY_DN23038_c0_g2	-4.70089	5.67817e-06	6.65744e-05	down	-3.02051	9.1704e-06	8.51624e-05	down	PREDICTED: transmembrane protein 135-like [Dendroctonus ponderosae]	4.25	GO:0016021	CC:integral component of membrane;	------	------	------	------	ENOG4111F8A;ENOG410YP91	S:Function unknown;	sp|Q3ZBE6|TM135_BOVIN;	Transmembrane protein 135 OS=Bos taurus OX=9913 GN=TMEM135 PE=2 SV=1;	PF15982	TMEM135_C_rich	N-terminal cysteine-rich region of Transmembrane protein 135
TRINITY_DN23039_c0_g1	-2.6941	2.09054e-05	0.000203045	down	-4.21206	3.02495e-08	5.3767e-07	down	hypothetical protein YQE_09607, partial [Dendroctonus ponderosae]	1.6	GO:0045087;GO:0007165;GO:0016021	BP:innate immune response;BP:signal transduction;CC:integral component of membrane;	------	------	------	------	COG4886	S:Function unknown	sp|Q9V477|TOLL8_DROME;	Toll-like receptor Tollo OS=Drosophila melanogaster OX=7227 GN=Tollo PE=1 SV=1;	PF13855;PF12799;PF13306;PF14580	LRR_8;LRR_4;LRR_5;LRR_9	Leucine rich repeat;Leucine Rich repeats;BspA type Leucine rich repeat region;Leucine-rich repeat
TRINITY_DN23040_c0_g2	1.68633	0.00045011	0.00269909	up	2.51538	9.1138e-06	8.47696e-05	up	hypothetical protein YQE_10083, partial [Dendroctonus ponderosae]	3.05	GO:0008270;GO:0003676	MF:zinc ion binding;MF:nucleic acid binding;	------	------	------	------	COG5067	S:Function unknown	------	------	------	------	------
TRINITY_DN23041_c1_g3	-1.8979	0.000246838	0.00163288	down	2.12347	8.00207e-05	0.000547654	up	PREDICTED: craniofacial development protein 2-like, partial [Dendroctonus ponderosae]	55.13	------	------	------	------	------	------	------	------	------	------	------	------	------
TRINITY_DN23049_c3_g3	-2.79775	7.66167e-12	4.14031e-10	down	-3.63975	1.77011e-47	1.07617e-43	down	hypothetical protein YQE_01566, partial [Dendroctonus ponderosae] >ERL87436.1 hypothetical protein D910_04829 [Dendroctonus ponderosae]	11.96	GO:0043001;GO:0005802	BP:Golgi to plasma membrane protein transport;CC:trans-Golgi network;	------	------	------	------	ENOG410XT40	S:Function unknown	sp|Q9VSH9|U183_DROME;	UPF0183 protein CG7083 OS=Drosophila melanogaster OX=7227 GN=CG7083 PE=2 SV=1;	PF03676	UPF0183	Uncharacterised protein family
TRINITY_DN23056_c0_g2	1.83586	0.000244936	0.00162225	up	-1.90798	3.38857e-10	9.29385e-09	down	PREDICTED: flap endonuclease 1 [Dendroctonus ponderosae] >AEE63570.1 unknown [Dendroctonus ponderosae] >ENN72811.1 hypothetical protein YQE_10615, partial [Dendroctonus ponderosae] >ERL90946.1 hypothetical protein D910_08288 [Dendroctonus ponderosae]	11.21	GO:0006284;GO:0006260;GO:0043137;GO:0005730;GO:0005634;GO:0005739;GO:0005654;GO:0000287;GO:0004519;GO:0017108;GO:0030145;GO:0008409;GO:0048256;GO:0003677;GO:0004523	BP:base-excision repair;BP:DNA replication;BP:DNA replication, removal of RNA primer;CC:nucleolus;CC:nucleus;CC:mitochondrion;CC:nucleoplasm;MF:magnesium ion binding;MF:endonuclease activity;MF:5'-flap endonuclease activity;MF:manganese ion binding;MF:5'-3' exonuclease activity;MF:flap endonuclease activity;MF:DNA binding;MF:RNA-DNA hybrid ribonuclease activity;	K04799	FEN1, RAD2	map03450;map03410;map03030	Non-homologous end-joining;Base excision repair;DNA replication	COG0258	S:Function unknown	sp|Q7Q323|FEN1_ANOGA;	Flap endonuclease 1 OS=Anopheles gambiae OX=7165 GN=Fen1 PE=3 SV=2;	PF00867;PF00752;PF01367	XPG_I;XPG_N;5_3_exonuc	XPG I-region;XPG N-terminal domain;5'-3' exonuclease, C-terminal SAM fold
TRINITY_DN23060_c0_g1	-3.99036	0.00152669	0.00736849	down	-5.57933	0.000102083	0.000676559	down	PREDICTED: uncharacterized protein LOC109534887 isoform X1 [Dendroctonus ponderosae]	6.12	------	------	------	------	------	------	------	------	------	------	------	------	------
TRINITY_DN23062_c0_g4	2.74996	0.000100599	0.000768842	up	3.37482	6.99565e-10	1.76234e-08	up	hypothetical protein YQE_06210, partial [Dendroctonus ponderosae] >ERL93611.1 hypothetical protein D910_10899 [Dendroctonus ponderosae]	3.51	GO:0004725;GO:0008138;GO:0017017	MF:protein tyrosine phosphatase activity;MF:protein tyrosine/serine/threonine phosphatase activity;MF:MAP kinase tyrosine/serine/threonine phosphatase activity;	K14165	K14165	------	------	COG2453	T:Signal transduction mechanisms	------	------	PF00782	DSPc	Dual specificity phosphatase, catalytic domain
TRINITY_DN23062_c0_g7	4.11493	5.87406e-08	1.25737e-06	up	4.41092	2.58576e-12	1.11758e-10	up	hypothetical protein YQE_06210, partial [Dendroctonus ponderosae] >ERL93611.1 hypothetical protein D910_10899 [Dendroctonus ponderosae]	3.61	GO:0004725;GO:0008138;GO:0017017	MF:protein tyrosine phosphatase activity;MF:protein tyrosine/serine/threonine phosphatase activity;MF:MAP kinase tyrosine/serine/threonine phosphatase activity;	K14165	K14165	------	------	COG2453	T:Signal transduction mechanisms	sp|Q17QM8|DUS14_BOVIN;	Dual specificity protein phosphatase 14 OS=Bos taurus OX=9913 GN=DUSP14 PE=2 SV=1;	PF00782	DSPc	Dual specificity phosphatase, catalytic domain
TRINITY_DN23072_c0_g1	-2.38148	4.82003e-06	5.77689e-05	down	3.95359	0.000291601	0.00167882	up	PREDICTED: LIM domain only protein 3-like [Dendroctonus ponderosae]	8.43	GO:0046872	MF:metal ion binding;	------	------	------	------	ENOG410YIJ3	T:Signal transduction mechanisms	sp|Q99MB5|LMO3_RAT;	LIM domain only protein 3 OS=Rattus norvegicus OX=10116 GN=Lmo3 PE=2 SV=2;	PF00412	LIM	LIM domain
TRINITY_DN23077_c1_g2	1.52506	0.00137075	0.0067421	up	1.51208	0.000112988	0.000739164	up	PREDICTED: N-alpha-acetyltransferase 10 [Dendroctonus ponderosae] >XP_019757826.1 PREDICTED: N-alpha-acetyltransferase 10 [Dendroctonus ponderosae] >XP_019757827.1 PREDICTED: N-alpha-acetyltransferase 10 [Dendroctonus ponderosae] >XP_019757828.1 PREDICTED: N-alpha-acetyltransferase 10 [Dendroctonus ponderosae] >XP_019757829.1 PREDICTED: N-alpha-acetyltransferase 10 [Dendroctonus ponderosae] >AEE6…	18.96	GO:0017198;GO:0018002;GO:0031415;GO:1990189;GO:0004596;GO:1990190	BP:N-terminal peptidyl-serine acetylation;BP:N-terminal peptidyl-glutamic acid acetylation;CC:NatA complex;MF:peptide-serine-N-acetyltransferase activity;MF:peptide alpha-N-acetyltransferase activity;MF:peptide-glutamate-N-acetyltransferase activity;	K20791	NAA10_11, ARD1_2	------	------	COG0456	S:Function unknown	sp|Q2KI14|NAA10_BOVIN;	N-alpha-acetyltransferase 10 OS=Bos taurus OX=9913 GN=NAA10 PE=2 SV=1;	PF00583;PF13673;PF13508;PF08445;PF13527	Acetyltransf_1;Acetyltransf_10;Acetyltransf_7;FR47;Acetyltransf_9	Acetyltransferase;Acetyltransferase;Acetyltransferase;FR47-like protein;Acetyltransferase
TRINITY_DN23088_c0_g2	2.28693	7.86727e-07	1.21027e-05	up	3.00644	9.16013e-07	1.1153e-05	up	PREDICTED: ribosome maturation protein SBDS [Dendroctonus ponderosae] >AEE63276.1 unknown [Dendroctonus ponderosae] >ENN75434.1 hypothetical protein YQE_07985, partial [Dendroctonus ponderosae] >ERL94162.1 hypothetical protein D910_11444 [Dendroctonus ponderosae]	11	GO:0042256	BP:mature ribosome assembly;	K14574	SDO1, SBDS	map03008	Ribosome biogenesis in eukaryotes	COG1500	J:Translation, ribosomal structure and biogenesis	sp|Q5ZIY4|SBDS_CHICK;	Ribosome maturation protein SBDS OS=Gallus gallus OX=9031 GN=SBDS PE=2 SV=1;	PF01172;PF09377	SBDS;SBDS_C	Shwachman-Bodian-Diamond syndrome;SBDS protein C-terminal domain
TRINITY_DN23092_c2_g1	1.69299	0.00220817	0.00997521	up	2.34652	0.000608791	0.00314625	up		11.1	------	------	------	------	------	------	------	------	------	------	------	------	------
TRINITY_DN23101_c1_g1	-4.22157	5.74069e-07	9.14852e-06	down	-2.36495	5.24817e-09	1.13012e-07	down	hypothetical protein D910_11133 [Dendroctonus ponderosae]	5.74	GO:0060071;GO:0001736;GO:0007275;GO:0016021;GO:0005886	BP:Wnt signaling pathway, planar cell polarity pathway;BP:establishment of planar polarity;BP:multicellular organism development;CC:integral component of membrane;CC:plasma membrane;	K04510	VANGL	map04310	Wnt signaling pathway	ENOG410XPVT	U:Intracellular trafficking, secretion, and vesicular transport	sp|Q8UVJ6|VANG2_DANRE;	Vang-like protein 2 OS=Danio rerio OX=7955 GN=vangl2 PE=1 SV=1;	PF06638	Strabismus	Strabismus protein
TRINITY_DN23105_c1_g1	-1.8726	1.73378e-06	2.38447e-05	down	-3.06015	3.90008e-10	1.04917e-08	down	hypothetical protein YQE_01712, partial [Dendroctonus ponderosae]	15.87	GO:0006414;GO:0003746;GO:0003924;GO:0005525	BP:translational elongation;MF:translation elongation factor activity;MF:GTPase activity;MF:GTP binding;	------	------	------	------	COG5258	S:Function unknown	sp|D2XV59|GTPB1_RAT;	GTP-binding protein 1 OS=Rattus norvegicus OX=10116 GN=Gtpbp1 PE=1 SV=1;	PF00009;PF03144;PF03143	GTP_EFTU;GTP_EFTU_D2;GTP_EFTU_D3	Elongation factor Tu GTP binding domain;Elongation factor Tu domain 2;Elongation factor Tu C-terminal domain
TRINITY_DN23107_c1_g1	-1.80336	2.26333e-06	2.99592e-05	down	2.13471	6.2696e-08	1.02649e-06	up	PREDICTED: peflin [Dendroctonus ponderosae] >ERL94797.1 hypothetical protein D910_12071 [Dendroctonus ponderosae]	43.47	GO:0005509	MF:calcium ion binding;	------	------	------	------	ENOG410YKQK	S:Function unknown	sp|Q9UBV8|PEF1_HUMAN;	Peflin OS=Homo sapiens OX=9606 GN=PEF1 PE=1 SV=1;	PF13499;PF00036;PF13405;PF13202;PF13833	EF-hand_7;EF-hand_1;EF-hand_6;EF-hand_5;EF-hand_8	EF-hand domain pair;EF hand;EF-hand domain;EF hand;EF-hand domain pair
TRINITY_DN23115_c1_g1	-1.7512	7.7516e-06	8.72047e-05	down	1.35807	0.000340704	0.00191852	up	PREDICTED: LOW QUALITY PROTEIN: uncharacterized protein LOC109541401 [Dendroctonus ponderosae]	11.41	------	------	K06104	AMOTL	map04530	Tight junction	ENOG410XSY2	Z:Cytoskeleton	sp|Q4VCS5|AMOT_HUMAN;	Angiomotin OS=Homo sapiens OX=9606 GN=AMOT PE=1 SV=1;	PF12240	Angiomotin_C	Angiomotin C terminal
TRINITY_DN23117_c1_g2	-1.92549	2.81515e-06	3.6167e-05	down	-2.38892	2.18545e-10	6.23794e-09	down	PREDICTED: ATP synthase subunit beta, mitochondrial [Dendroctonus ponderosae] >AEE62821.1 unknown [Dendroctonus ponderosae] >ENN75086.1 hypothetical protein YQE_08399, partial [Dendroctonus ponderosae]	1307.26	GO:0015986;GO:0042776;GO:0045261;GO:0005753;GO:0046933;GO:0005524	BP:ATP synthesis coupled proton transport;BP:mitochondrial ATP synthesis coupled proton transport;CC:proton-transporting ATP synthase complex, catalytic core;CC:mitochondrial proton-transporting ATP synthase complex;MF:proton-transporting ATP synthase activity, rotational mechanism;MF:ATP binding;	K02133	ATPeF1B, ATP5B, ATP2	map05012;map00190;map05010;map05016	Parkinson's disease;Oxidative phosphorylation;Alzheimer's disease;Huntington's disease	COG0055;COG1499	C:Energy production and conversion;J:Translation, ribosomal structure and biogenesis	sp|Q05825|ATPB_DROME;	ATP synthase subunit beta, mitochondrial OS=Drosophila melanogaster OX=7227 GN=ATPsynbeta PE=1 SV=3;	PF00006;PF02874	ATP-synt_ab;ATP-synt_ab_N	ATP synthase alpha/beta family, nucleotide-binding domain;ATP synthase alpha/beta family, beta-barrel domain
TRINITY_DN23125_c0_g1	3.44057	3.25704e-14	2.98628e-12	up	1.63206	5.30686e-05	0.000385164	up	PREDICTED: elongation of very long chain fatty acids protein AAEL008004 [Dendroctonus ponderosae] >ENN70418.1 hypothetical protein YQE_12923, partial [Dendroctonus ponderosae] >ERL88358.1 hypothetical protein D910_05745 [Dendroctonus ponderosae]	11.86	GO:0006633;GO:0034625;GO:0042632;GO:0035209;GO:0034626;GO:0006694;GO:0019367;GO:0030148;GO:0042761;GO:0030176;GO:0016021;GO:0009922;GO:0102337;GO:0102336;GO:0102338;GO:0102756	BP:fatty acid biosynthetic process;BP:fatty acid elongation, monounsaturated fatty acid;BP:cholesterol homeostasis;BP:pupal development;BP:fatty acid elongation, polyunsaturated fatty acid;BP:steroid biosynthetic process;BP:fatty acid elongation, saturated fatty acid;BP:sphingolipid biosynthetic process;BP:very long-chain fatty acid biosynthetic process;CC:integral component of endoplasmic reticu…	------	------	------	------	ENOG410XRWT	K:Transcription	sp|Q1HRV8|ELVL1_AEDAE;	Elongation of very long chain fatty acids protein AAEL008004 OS=Aedes aegypti OX=7159 GN=AAEL008004 PE=2 SV=2;	PF01151	ELO	GNS1/SUR4 family
TRINITY_DN23137_c2_g2	4.19522	0.000793609	0.00431063	up	2.9781	4.11851e-05	0.000309253	up	PREDICTED: regulator of G-protein signaling 11 isoform X2 [Dendroctonus ponderosae]	55.54	GO:0035556;GO:0007186	BP:intracellular signal transduction;BP:G-protein coupled receptor signaling pathway;	K16449	RGS	------	------	ENOG410YMJD	K:Transcription	------	------	------	------	------
TRINITY_DN23148_c1_g3	2.52312	3.06171e-06	3.90248e-05	up	4.72318	3.53747e-21	7.01303e-19	up	PREDICTED: uncharacterized protein LOC109533950 isoform X4 [Dendroctonus ponderosae]	12.02	------	------	------	------	------	------	------	------	------	------	------	------	------
TRINITY_DN23154_c0_g2	-2.73099	4.50031e-05	0.000388773	down	4.25377	0.00217134	0.00915041	up		4.31	------	------	------	------	------	------	------	------	------	------	------	------	------
TRINITY_DN23156_c0_g10	1.42558	4.73841e-05	0.00040575	up	-1.10734	0.00112467	0.00527729	down	PREDICTED: 60S ribosomal protein L13 [Dendroctonus ponderosae] >AEE62125.1 unknown [Dendroctonus ponderosae]	198.76	GO:0006412;GO:0022625;GO:0005840;GO:0003735;GO:0046872	BP:translation;CC:cytosolic large ribosomal subunit;CC:ribosome;MF:structural constituent of ribosome;MF:metal ion binding;	K02873	RP-L13e, RPL13	map03010	Ribosome	COG4352	J:Translation, ribosomal structure and biogenesis	sp|Q962U1|RL13_SPOFR;	60S ribosomal protein L13 OS=Spodoptera frugiperda OX=7108 GN=RpL13 PE=2 SV=1;	PF01294	Ribosomal_L13e	Ribosomal protein L13e
TRINITY_DN23160_c1_g5	8.54457	8.61808e-10	3.07456e-08	up	8.98717	1.31596e-07	1.99516e-06	up	hypothetical protein D910_12691 [Dendroctonus ponderosae]	0	GO:0005506;GO:0016705;GO:0004497;GO:0020037	MF:iron ion binding;MF:oxidoreductase activity, acting on paired donors, with incorporation or reduction of molecular oxygen;MF:monooxygenase activity;MF:heme binding;	------	------	------	------	------	------	------	------	PF00067	p450	Cytochrome P450
TRINITY_DN23161_c0_g1	2.27059	2.59259e-05	0.000243053	up	1.82661	9.25336e-05	0.000621805	up	PREDICTED: max-binding protein MNT-like [Dendroctonus ponderosae] >ENN72105.1 hypothetical protein YQE_11244, partial [Dendroctonus ponderosae]	16.52	GO:0046983;GO:0016301	MF:protein dimerization activity;MF:kinase activity;	K00871;K09115	PHKG;MNT, ROX	map04910;map04922;map04020	Insulin signaling pathway;Glucagon signaling pathway;Calcium signaling pathway	ENOG4111VW9;ENOG4112D2E	S:Function unknown;	sp|Q0VH32|MNT_XENLA;	Max-binding protein MNT OS=Xenopus laevis OX=8355 GN=mnt PE=2 SV=1;	PF00010	HLH	Helix-loop-helix DNA-binding domain
TRINITY_DN23178_c2_g1	5.47399	4.74785e-06	5.71779e-05	up	6.31005	3.53703e-05	0.000271927	up		0	------	------	------	------	------	------	------	------	------	------	------	------	------
TRINITY_DN23208_c0_g1	1.4165	0.00093897	0.00496011	up	3.11701	0.0017131	0.00748567	up	PREDICTED: general transcription factor IIF subunit 1 [Dendroctonus ponderosae] >ENN72668.1 hypothetical protein YQE_10766, partial [Dendroctonus ponderosae] >ERL86871.1 hypothetical protein D910_04274 [Dendroctonus ponderosae]	8.18	GO:0032968;GO:0006367;GO:0005634;GO:0003677	BP:positive regulation of transcription elongation from RNA polymerase II promoter;BP:transcription initiation from RNA polymerase II promoter;CC:nucleus;MF:DNA binding;	K03138	TFIIF1, GTF2F1, TFG1	map03022	Basal transcription factors	ENOG410XSRW;ENOG41102AX	K:Transcription;S:Function unknown	sp|Q05913|T2FA_DROME;	General transcription factor IIF subunit 1 OS=Drosophila melanogaster OX=7227 GN=TfIIFalpha PE=1 SV=3;	PF05793	TFIIF_alpha	Transcription initiation factor IIF, alpha subunit
TRINITY_DN23212_c0_g5	-1.67227	0.000130898	0.000957319	down	3.66217	1.8469e-06	2.07169e-05	up	PREDICTED: RNA-binding protein 24-A-like [Dendroctonus ponderosae] >ENN74222.1 hypothetical protein YQE_09195, partial [Dendroctonus ponderosae]	39.51	GO:0007281;GO:0006397;GO:1990904;GO:0003723;GO:0003729	BP:germ cell development;BP:mRNA processing;CC:ribonucleoprotein complex;MF:RNA binding;MF:mRNA binding;	------	------	------	------	ENOG4111PGT	S:Function unknown	sp|Q9H0Z9|RBM38_HUMAN;	RNA-binding protein 38 OS=Homo sapiens OX=9606 GN=RBM38 PE=1 SV=2;	PF00076	RRM_1	RNA recognition motif.
TRINITY_DN23217_c0_g5	-2.58781	0.000610997	0.00347449	down	-2.5388	6.53963e-07	8.28308e-06	down	PREDICTED: RNA-directed DNA polymerase from mobile element jockey-like, partial [Strongylocentrotus purpuratus]	9.8	------	------	------	------	------	------	ENOG4111B4P;ENOG410Y65V	S:Function unknown;	------	------	------	------	------
TRINITY_DN23225_c1_g1	1.74239	1.91585e-06	2.59977e-05	up	4.46619	7.29139e-19	1.00748e-16	up	PREDICTED: vacuolar protein sorting-associated protein 72 homolog [Dendroctonus ponderosae] >ENN75783.1 hypothetical protein YQE_07740, partial [Dendroctonus ponderosae] >ERL92042.1 hypothetical protein D910_09364 [Dendroctonus ponderosae]	28.36	GO:0043486;GO:0006355;GO:0005634	BP:histone exchange;BP:regulation of transcription, DNA-templated;CC:nucleus;	K11664	VPS72, TCFL1, YL1	------	------	ENOG41119RU	S:Function unknown	sp|Q9VKM6|VPS72_DROME;	Vacuolar protein sorting-associated protein 72 homolog OS=Drosophila melanogaster OX=7227 GN=YL-1 PE=1 SV=1;	PF05764;PF08265	YL1;YL1_C	YL1 nuclear protein;YL1 nuclear protein C-terminal domain
TRINITY_DN23228_c0_g1	-2.67323	1.8331e-06	2.49733e-05	down	-5.47552	1.23252e-12	5.69113e-11	down		57.93	------	------	------	------	------	------	------	------	------	------	------	------	------
TRINITY_DN23235_c0_g1	-1.62969	7.63869e-05	0.000606727	down	1.54757	0.00105453	0.00499315	up	PREDICTED: UPF0472 protein C16orf72 homolog isoform X2 [Dendroctonus ponderosae] >ENN76931.1 hypothetical protein YQE_06578, partial [Dendroctonus ponderosae]	40.96	------	------	------	------	------	------	ENOG410YYIF	S:Function unknown	sp|Q14CZ0|CP072_HUMAN;	UPF0472 protein C16orf72 OS=Homo sapiens OX=9606 GN=C16orf72 PE=1 SV=1;	PF15251	DUF4588	Domain of unknown function
TRINITY_DN23237_c0_g4	-4.24678	4.37051e-09	1.28435e-07	down	-5.78451	1.27769e-07	1.94904e-06	down	hypothetical protein D910_05388, partial [Dendroctonus ponderosae]	4.94	GO:0005737;GO:0016491;GO:0047522;GO:0032440	CC:cytoplasm;MF:oxidoreductase activity;MF:15-oxoprostaglandin 13-oxidase activity;MF:2-alkenal reductase [NA;	K13948	PTGR1, LTB4DH	------	------	COG2130	S:Function unknown	sp|P97584|PTGR1_RAT;	Prostaglandin reductase 1 OS=Rattus norvegicus OX=10116 GN=Ptgr1 PE=2 SV=3;	PF16884;PF00107;PF13602	ADH_N_2;ADH_zinc_N;ADH_zinc_N_2	N-terminal domain of oxidoreductase;Zinc-binding dehydrogenase;Zinc-binding dehydrogenase
TRINITY_DN23241_c1_g1	1.55264	1.86475e-05	0.000184172	up	-1.67846	5.78785e-10	1.49313e-08	down	PREDICTED: COP9 signalosome complex subunit 1 [Dendroctonus ponderosae]	14	GO:0000338;GO:0008180;GO:0009055	BP:protein deneddylation;CC:COP9 signalosome;MF:electron carrier activity;	K12175	GPS1, COPS1, CSN1	------	------	ENOG410XRXI	O:Posttranslational modification, protein turnover, chaperones	sp|Q13098|CSN1_HUMAN;	COP9 signalosome complex subunit 1 OS=Homo sapiens OX=9606 GN=GPS1 PE=1 SV=4;	PF10602;PF01399;PF07719	RPN7;PCI;TPR_2	26S proteasome subunit RPN7;PCI domain;Tetratricopeptide repeat
TRINITY_DN23244_c0_g1	2.64914	9.49625e-05	0.000729823	up	3.59264	3.42226e-06	3.55257e-05	up	hypothetical protein DBV15_09030 [Temnothorax longispinosus]	0.4	GO:0003676	MF:nucleic acid binding;	------	------	------	------	ENOG410YPVD;COG5048	S:Function unknown;	sp|Q9V5M3|LOLA6_DROME;	Longitudinals lacking protein, isoforms N/O/W/X/Y OS=Drosophila melanogaster OX=7227 GN=lola PE=1 SV=3;	PF00096;PF13894;PF16622;PF13909;PF02892	zf-C2H2;zf-C2H2_4;zf-C2H2_11;zf-H2C2_5;zf-BED	Zinc finger, C2H2 type;C2H2-type zinc finger;zinc-finger C2H2-type;C2H2-type zinc-finger domain;BED zinc finger
TRINITY_DN23246_c0_g5	-2.64189	1.01215e-05	0.000109564	down	2.92315	2.55756e-07	3.6049e-06	up	PREDICTED: rho guanine nucleotide exchange factor 17-like isoform X1 [Dendroctonus ponderosae]	5.78	GO:0030036;GO:0035023;GO:0005089;GO:0005085	BP:actin cytoskeleton organization;BP:regulation of Rho protein signal transduction;MF:Rho guanyl-nucleotide exchange factor activity;MF:guanyl-nucleotide exchange factor activity;	K20689	ARHGEF17	------	------	ENOG410XSIJ	T:Signal transduction mechanisms	sp|Q96PE2|ARHGH_HUMAN;	Rho guanine nucleotide exchange factor 17 OS=Homo sapiens OX=9606 GN=ARHGEF17 PE=1 SV=1;	PF00621	RhoGEF	RhoGEF domain
TRINITY_DN23265_c0_g1	-2.58615	1.41834e-15	1.7111e-13	down	2.29095	6.65664e-07	8.3847e-06	up	PREDICTED: adenylosuccinate synthetase [Dendroctonus ponderosae]	54.12	GO:0044208;GO:0046040;GO:0005737;GO:0004019;GO:0000287;GO:0005525	BP:'de novo' AMP biosynthetic process;BP:IMP metabolic process;CC:cytoplasm;MF:adenylosuccinate synthase activity;MF:magnesium ion binding;MF:GTP binding;	K01939	purA, ADSS	map00250;map00230	Alanine, aspartate and glutamate metabolism;Purine metabolism	COG0104	C:Energy production and conversion	sp|B0W9B4|PURA_CULQU;	Adenylosuccinate synthetase OS=Culex quinquefasciatus OX=7176 GN=CPIJ003725 PE=3 SV=1;	PF00709	Adenylsucc_synt	Adenylosuccinate synthetase
TRINITY_DN23276_c0_g1	-2.47981	4.99571e-06	5.95631e-05	down	3.59618	2.61993e-06	2.81751e-05	up	PREDICTED: voltage-dependent calcium channel subunit alpha-2/delta-3 isoform X1 [Dendroctonus ponderosae]	20.03	GO:0005891;GO:0005245	CC:voltage-gated calcium channel complex;MF:voltage-gated calcium channel activity;	K04861	CACNA2D4	map04260;map04261;map04010;map04921;map05414;map05412;map05410	Cardiac muscle contraction;Adrenergic signaling in cardiomyocytes;MAPK signaling pathway;Oxytocin signaling pathway;Dilated cardiomyopathy;Arrhythmogenic right ventricular cardiomyopath;Hypertrophic cardiomyopath	ENOG410XPDX	S:Function unknown	sp|Q8IZS8|CA2D3_HUMAN;	Voltage-dependent calcium channel subunit alpha-2/delta-3 OS=Homo sapiens OX=9606 GN=CACNA2D3 PE=1 SV=1;	PF08473;PF02743	VGCC_alpha2;dCache_1	Neuronal voltage-dependent calcium channel alpha 2acd;Cache domain
TRINITY_DN23279_c0_g1	2.1433	0.0016122	0.00769881	up	-1.47002	0.00202101	0.00862654	down	hypothetical protein D910_06981, partial [Dendroctonus ponderosae]	1.33	GO:0016021	CC:integral component of membrane;	K19370	DNAJC22	------	------	COG0484	O:Posttranslational modification, protein turnover, chaperones	sp|Q5PR00|DJC22_RAT;	DnaJ homolog subfamily C member 22 OS=Rattus norvegicus OX=10116 GN=Dnajc22 PE=2 SV=1;	PF00226;PF05154	DnaJ;TM2	DnaJ domain;TM2 domain
TRINITY_DN23283_c2_g1	-1.92563	1.39065e-05	0.000143049	down	-1.66007	2.87445e-06	3.04631e-05	down	hypothetical protein D910_01427 [Dendroctonus ponderosae] >ERL84096.1 hypothetical protein D910_01433 [Dendroctonus ponderosae]	126.26	GO:0051287;GO:0048038;GO:0016651;GO:0005549	MF:NAD binding;MF:quinone binding;MF:oxidoreductase activity, acting on NA;MF:odorant binding;	K03935	NDUFS2	map00190;map05012;map05010;map04723;map05016;map04932	Oxidative phosphorylation;Parkinson's disease;Alzheimer's disease;Retrograde endocannabinoid signaling;Huntington's disease;Non-alcoholic fatty liver diseas	COG0649	C:Energy production and conversion	sp|Q91WD5|NDUS2_MOUSE;	NADH dehydrogenase [ubiquinone] iron-sulfur protein 2, mitochondrial OS=Mus musculus OX=10090 GN=Ndufs2 PE=1 SV=1;	PF00346	Complex1_49kDa	Respiratory-chain NADH dehydrogenase, 49 Kd subunit
TRINITY_DN23290_c0_g1	2.14688	0.000205956	0.00139912	up	2.82802	7.55028e-10	1.89162e-08	up	PREDICTED: longitudinals lacking protein, isoforms H/M/V isoform X9 [Aethina tumida]	1.24	GO:0003676	MF:nucleic acid binding;	------	------	------	------	ENOG410YPVD	S:Function unknown	sp|Q7KQZ4|LOLA3_DROME;	Longitudinals lacking protein, isoforms A/B/D/L OS=Drosophila melanogaster OX=7227 GN=lola PE=1 SV=1;	PF00096;PF13894	zf-C2H2;zf-C2H2_4	Zinc finger, C2H2 type;C2H2-type zinc finger
TRINITY_DN23314_c0_g1	-2.16623	4.07148e-08	9.23249e-07	down	-2.38793	0.000278381	0.00160829	down	PREDICTED: monocarboxylate transporter 9-like isoform X1 [Dendroctonus ponderosae]	19.21	GO:0015718;GO:0055085;GO:0016021;GO:0008028	BP:monocarboxylic acid transport;BP:transmembrane transport;CC:integral component of membrane;MF:monocarboxylic acid transmembrane transporter activity;	------	------	------	------	ENOG410YDNI;ENOG410ZJAE;COG0477;ENOG410ZJCH	S:Function unknown;G:Carbohydrate transport and metabolism;G:Carbohydrate transport and metabolism;G:Carbohydrate transport and metabolism	sp|Q5R5M4|MOT9_PONAB;	Monocarboxylate transporter 9 OS=Pongo abelii OX=9601 GN=SLC16A9 PE=2 SV=1;	PF07690	MFS_1	Major Facilitator Superfamily
TRINITY_DN23325_c1_g1	-2.56258	0.00164819	0.00784345	down	-4.04788	6.07002e-07	7.78011e-06	down	PREDICTED: ras association domain-containing protein 8 [Dendroctonus ponderosae] >XP_019766049.1 PREDICTED: ras association domain-containing protein 8 [Dendroctonus ponderosae]	3.44	GO:0007165	BP:signal transduction;	K09855	RASSF7_8	------	------	ENOG410XPWB	S:Function unknown	sp|Q8CJ96|RASF8_MOUSE;	Ras association domain-containing protein 8 OS=Mus musculus OX=10090 GN=Rassf8 PE=2 SV=1;	PF00788	RA	Ras association
TRINITY_DN23326_c0_g4	1.07103	0.00170264	0.00804547	up	-1.25291	7.15746e-07	8.9292e-06	down	PREDICTED: vacuolar protein sorting-associated protein 4A [Dendroctonus ponderosae] >ENN72251.1 hypothetical protein YQE_11114, partial [Dendroctonus ponderosae] >ERL94352.1 hypothetical protein D910_11633 [Dendroctonus ponderosae]	11.44	GO:0007033;GO:0005634;GO:0016887;GO:0005524	BP:vacuole organization;CC:nucleus;MF:ATPase activity;MF:ATP binding;	K12196	VPS4	map04144	Endocytosis	ENOG410XRHN	O:Posttranslational modification, protein turnover, chaperones	sp|P46467|VPS4B_MOUSE;	Vacuolar protein sorting-associated protein 4B OS=Mus musculus OX=10090 GN=Vps4b PE=1 SV=2;	PF00004;PF09336;PF17862	AAA;Vps4_C;AAA_lid_3	ATPase family associated with various cellular activities;Vps4 C terminal oligomerisation domain;AAA+ lid domain
TRINITY_DN23330_c0_g2	-1.28994	0.00118034	0.00597359	down	1.05676	0.00117611	0.00548184	up	PREDICTED: protein preli-like isoform X1 [Dendroctonus ponderosae] >ENN72685.1 hypothetical protein YQE_10781, partial [Dendroctonus ponderosae] >ERL85808.1 hypothetical protein D910_03224 [Dendroctonus ponderosae]	31.59	GO:0015914;GO:0005758;GO:1990050	BP:phospholipid transport;CC:mitochondrial intermembrane space;MF:phosphatidic acid transporter activity;	------	------	------	------	ENOG411110V	S:Function unknown	sp|Q9V579|PREL_DROME;	Protein preli-like OS=Drosophila melanogaster OX=7227 GN=prel PE=2 SV=3;	PF04707	PRELI	PRELI-like family
TRINITY_DN23333_c0_g1	-2.28861	0.000144663	0.00104301	down	-3.61637	2.25772e-06	2.47468e-05	down	PREDICTED: isocitrate dehydrogenase [NADP]-like [Dendroctonus ponderosae] >ERL93482.1 hypothetical protein D910_10772 [Dendroctonus ponderosae]	59.42	GO:0006099;GO:0006102;GO:0004450;GO:0000287;GO:0051287	BP:tricarboxylic acid cycle;BP:isocitrate metabolic process;MF:isocitrate dehydrogenas;MF:magnesium ion binding;MF:NAD binding;	K00031	IDH1, IDH2, icd	map00020;map04146;map00480	Citrate cycl;Peroxisome;Glutathione metabolism	COG0538	C:Energy production and conversion	sp|Q40345|IDHP_MEDSA;	Isocitrate dehydrogenase [NADP], chloroplastic;	PF00180	Iso_dh	Isocitrate/isopropylmalate dehydrogenase
TRINITY_DN23336_c0_g2	-1.36766	0.00169813	0.00802831	down	-1.25296	0.000185845	0.00113899	down	PREDICTED: UDP-N-acetylglucosamine--dolichyl-phosphate N-acetylglucosaminephosphotransferase [Dendroctonus ponderosae]	28.13	GO:0006487;GO:0006488;GO:0006489;GO:0016021;GO:0008963;GO:0003975	BP:protein N-linked glycosylation;BP:dolichol-linked oligosaccharide biosynthetic process;BP:dolichyl diphosphate biosynthetic process;CC:integral component of membrane;MF:phospho-N-acetylmuramoyl-pentapeptide-transferase activity;MF:UDP-N-acetylglucosamine-dolichyl-phosphate N-acetylglucosaminephosphotransferase activity;	K01001	ALG7	map00510	N-Glycan biosynthesis	COG0472	M:Cell wall/membrane/envelope biogenesis	sp|P23338|GPT_CRILO;	UDP-N-acetylglucosamine--dolichyl-phosphate N-acetylglucosaminephosphotransferase OS=Cricetulus longicaudatus OX=10030 GN=DPAGT1 PE=1 SV=1;	PF00953	Glycos_transf_4	Glycosyl transferase family 4
TRINITY_DN23340_c0_g2	2.92209	2.68452e-07	4.73033e-06	up	2.45488	1.35003e-10	4.09704e-09	up	PREDICTED: MKI67 FHA domain-interacting nucleolar phosphoprotein-like [Dendroctonus ponderosae] >ENN72963.1 hypothetical protein YQE_10415, partial [Dendroctonus ponderosae]	20.44	GO:1990904;GO:0005730;GO:0031491;GO:0003723	CC:ribonucleoprotein complex;CC:nucleolus;MF:nucleosome binding;MF:RNA binding;	K06173;K14838	truA, PUS1;NOP15	------	------	ENOG4111NF9	S:Function unknown	sp|Q6GL69|MK67I_XENTR;	MKI67 FHA domain-interacting nucleolar phosphoprotein-like OS=Xenopus tropicalis OX=8364 GN=nifk PE=2 SV=1;	PF00076	RRM_1	RNA recognition motif.
TRINITY_DN23341_c0_g4	-2.25682	0.00115422	0.00585864	down	-2.43099	0.000615009	0.00317217	down	unknown [Dendroctonus ponderosae]	9.36	GO:0045905;GO:0045901;GO:0006452;GO:0003743;GO:0003746;GO:0043022;GO:0016491	BP:positive regulation of translational termination;BP:positive regulation of translational elongation;BP:translational frameshifting;MF:translation initiation factor activity;MF:translation elongation factor activity;MF:ribosome binding;MF:oxidoreductase activity;	K03263	EIF5A	------	------	COG0231	J:Translation, ribosomal structure and biogenesis	sp|P62924|IF5A_SPOEX;	Eukaryotic translation initiation factor 5A OS=Spodoptera exigua OX=7107 GN=eIF-5A PE=2 SV=1;	------	------	------
TRINITY_DN23343_c3_g1	-2.41377	8.05664e-06	9.00837e-05	down	-3.1172	4.30456e-07	5.75073e-06	down	PREDICTED: steroid hormone receptor ERR2 isoform X4 [Dendroctonus ponderosae]	23.34	GO:0005634;GO:0043565;GO:0003700;GO:0003707;GO:0008270;GO:0005496	CC:nucleus;MF:sequence-specific DNA binding;MF:transcription factor activity, sequence-specific DNA binding;MF:steroid hormone receptor activity;MF:zinc ion binding;MF:steroid binding;	K08703	NR3BN, ERR	------	------	ENOG410XRZC	K:Transcription	sp|P62508|ERR3_HUMAN;	Estrogen-related receptor gamma OS=Homo sapiens OX=9606 GN=ESRRG PE=1 SV=1;	PF00105	zf-C4	Zinc finger, C4 type
TRINITY_DN23345_c1_g3	-4.3453	4.83464e-05	0.000412474	down	-4.09771	0.000706011	0.00355815	down		1.83	------	------	------	------	------	------	------	------	------	------	------	------	------
TRINITY_DN23351_c0_g3	-2.85728	8.06269e-13	5.46237e-11	down	-2.49528	0.00192493	0.00826477	down	PREDICTED: elongation of very long chain fatty acids protein AAEL008004-like [Dendroctonus ponderosae] >AEE62578.1 unknown [Dendroctonus ponderosae]	98.57	GO:0006633;GO:0034625;GO:0000077;GO:0042761;GO:0034626;GO:0019367;GO:0030148;GO:0030896;GO:0016021;GO:0030176;GO:0009922;GO:0102337;GO:0102336;GO:0102338;GO:0102756	BP:fatty acid biosynthetic process;BP:fatty acid elongation, monounsaturated fatty acid;BP:DNA damage checkpoint;BP:very long-chain fatty acid biosynthetic process;BP:fatty acid elongation, polyunsaturated fatty acid;BP:fatty acid elongation, saturated fatty acid;BP:sphingolipid biosynthetic process;CC:checkpoint clamp complex;CC:integral component of membrane;CC:integral component of endoplasmic…	------	------	------	------	ENOG410XRWT	I:Lipid transport and metabolism	sp|Q9EQC4|ELOV4_MOUSE;	Elongation of very long chain fatty acids protein 4 OS=Mus musculus OX=10090 GN=Elovl4 PE=1 SV=2;	PF01151	ELO	GNS1/SUR4 family
TRINITY_DN23361_c0_g1	-2.64805	3.09682e-09	9.46457e-08	down	2.66245	5.58092e-11	1.84738e-09	up	PREDICTED: trehalase-like isoform X3 [Dendroctonus ponderosae]	23.09	GO:0005991;GO:0016021;GO:0004555	BP:trehalose metabolic process;CC:integral component of membrane;MF:alpha,alpha-trehalase activity;	K01194	TREH, treA, treF	map00500	Starch and sucrose metabolism	COG1626	G:Carbohydrate transport and metabolism	sp|A8J4S9|TREA_APIME;	Trehalase OS=Apis mellifera OX=7460 PE=1 SV=1;	PF01204;PF06202	Trehalase;GDE_C	Trehalase;Amylo-alpha-1,6-glucosidase
TRINITY_DN23361_c1_g2	-1.92627	2.17502e-08	5.39948e-07	down	1.55162	0.000528582	0.00278797	up	PREDICTED: catenin delta-2 isoform X1 [Dendroctonus ponderosae] >XP_019765072.1 PREDICTED: catenin delta-2 isoform X1 [Dendroctonus ponderosae] >XP_019765073.1 PREDICTED: catenin delta-2 isoform X1 [Dendroctonus ponderosae]	29.49	GO:0098609;GO:0007043;GO:0032956;GO:0010172;GO:0005737;GO:0005911;GO:0005634;GO:0005886;GO:0005913;GO:0045296	BP:cell-cell adhesion;BP:cell-cell junction assembly;BP:regulation of actin cytoskeleton organization;BP:embryonic body morphogenesis;CC:cytoplasm;CC:cell-cell junction;CC:nucleus;CC:plasma membrane;CC:cell-cell adherens junction;MF:cadherin binding;	------	------	------	------	ENOG410Y21Q	U:Intracellular trafficking, secretion, and vesicular transport	sp|Q9UQB3|CTND2_HUMAN;	Catenin delta-2 OS=Homo sapiens OX=9606 GN=CTNND2 PE=1 SV=3;	PF00514;PF13646	Arm;HEAT_2	Armadillo/beta-catenin-like repeat;HEAT repeats
TRINITY_DN23375_c0_g2	2.42226	8.00243e-07	1.22832e-05	up	2.58212	5.32195e-12	2.16185e-10	up	hypothetical protein YQE_10288, partial [Dendroctonus ponderosae]	2.79	------	------	------	------	------	------	------	------	------	------	------	------	------
TRINITY_DN23378_c0_g3	1.80303	0.000103714	0.000788705	up	1.21839	0.00239475	0.00988647	up	hypothetical protein YQE_05954, partial [Dendroctonus ponderosae]	7.16	GO:0016021;GO:0016787;GO:0003924;GO:0004386;GO:0003676;GO:0005524;GO:0005525	CC:integral component of membrane;MF:hydrolase activity;MF:GTPase activity;MF:helicase activity;MF:nucleic acid binding;MF:ATP binding;MF:GTP binding;	K06883	K06883	------	------	ENOG410XPBZ;COG1643	S:Function unknown;L:Replication, recombination and repair	sp|Q4V7Z0|GPN3_XENLA;	GPN-loop GTPase 3 OS=Xenopus laevis OX=8355 GN=gpn3 PE=2 SV=1;	PF07717	OB_NTP_bind	Oligonucleotide/oligosaccharide-binding
TRINITY_DN23380_c0_g1	1.81023	0.000175102	0.00122367	up	-1.15983	0.00167304	0.00733522	down	PREDICTED: putative inorganic phosphate cotransporter isoform X1 [Dendroctonus ponderosae]	7.21	GO:0055085;GO:0016021	BP:transmembrane transport;CC:integral component of membrane;	------	------	------	------	ENOG410ZMWY;ENOG410YRXZ;ENOG410XPWC	G:Carbohydrate transport and metabolism;S:Function unknown;G:Carbohydrate transport and metabolism	sp|Q9V7S5|PICO_DROME;	Putative inorganic phosphate cotransporter OS=Drosophila melanogaster OX=7227 GN=Picot PE=2 SV=1;	PF07690;PF00083	MFS_1;Sugar_tr	Major Facilitator Superfamily;Sugar
TRINITY_DN23386_c0_g1	3.63045	4.80703e-05	0.000410246	up	6.63573	0.000234307	0.00139248	up		0.24	------	------	------	------	------	------	------	------	------	------	------	------	------
TRINITY_DN23392_c0_g1	2.71838	8.76951e-07	1.32535e-05	up	3.64928	0.000861971	0.00420248	up	PREDICTED: girdin isoform X2 [Dendroctonus ponderosae]	3.48	GO:1902017;GO:0007099	BP:regulation of cilium assembly;BP:centriole replication;	------	------	------	------	ENOG4111P4W	S:Function unknown	------	------	PF07926	TPR_MLP1_2	TPR/MLP1/MLP2-like protein
TRINITY_DN23395_c0_g2	-3.82355	4.0116e-11	1.8734e-09	down	-2.7302	0.00045305	0.00245053	down	hypothetical protein YQE_10113, partial [Dendroctonus ponderosae]	3.14	GO:0046872	MF:metal ion binding;	K19947	MICAL	------	------	COG5069	Z:Cytoskeleton	------	------	------	------	------
TRINITY_DN23396_c1_g1	-1.63516	1.07888e-05	0.000115471	down	1.24551	0.000244788	0.0014452	up	PREDICTED: prolyl endopeptidase isoform X1 [Dendroctonus ponderosae]	25.44	GO:0005737;GO:0005829;GO:0004252;GO:0004175;GO:0070012;GO:0070008	CC:cytoplasm;CC:cytosol;MF:serine-type endopeptidase activity;MF:endopeptidase activity;MF:oligopeptidase activity;MF:serine-type exopeptidase activity;	K01322	PREP	map04614	Renin-angiotensin system	COG1505	E:Amino acid transport and metabolism	sp|P23687|PPCE_PIG;	Prolyl endopeptidase OS=Sus scrofa OX=9823 GN=PREP PE=1 SV=1;	PF02897;PF00326	Peptidase_S9_N;Peptidase_S9	Prolyl oligopeptidase, N-terminal beta-propeller domain;Prolyl oligopeptidase family
TRINITY_DN23407_c0_g3	1.77796	0.00016834	0.00118484	up	2.40116	3.65412e-08	6.35342e-07	up		23.1	------	------	------	------	------	------	------	------	------	------	------	------	------
TRINITY_DN23411_c1_g10	-1.9436	0.00020709	0.00140439	down	-2.20534	6.0319e-05	0.000431266	down		2123.82	------	------	------	------	------	------	------	------	------	------	------	------	------
TRINITY_DN23416_c0_g1	-3.16716	2.80789e-21	8.12986e-19	down	-1.31335	2.96319e-06	3.12222e-05	down	PREDICTED: E3 ubiquitin-protein ligase MARCH6 [Dendroctonus ponderosae]	27.31	GO:0030433;GO:0016021;GO:0030176;GO:0016874;GO:0008270	BP:ER-associated ubiquitin-dependent protein catabolic process;CC:integral component of membrane;CC:integral component of endoplasmic reticulum membrane;MF:ligase activity;MF:zinc ion binding;	K10661	MARCH6, DOA10	map04141	Protein processing in endoplasmic reticulum	COG5183;COG5183;COG5183	D:Cell cycle control, cell division, chromosome partitioning;T:Signal transduction mechanisms;Z:Cytoskeleton	sp|Q6ZQ89|MARH6_MOUSE;	E3 ubiquitin-protein ligase MARCH6 OS=Mus musculus OX=10090 GN=March6 PE=2 SV=2;	PF12906	RINGv	RING-variant domain
TRINITY_DN23424_c1_g1	-3.26049	6.9336e-09	1.92448e-07	down	-3.1663	4.44697e-07	5.90738e-06	down	PREDICTED: uncharacterized protein LOC109546495 [Dendroctonus ponderosae] >ENN81736.1 hypothetical protein YQE_01875, partial [Dendroctonus ponderosae] >ERL91422.1 hypothetical protein D910_08754 [Dendroctonus ponderosae]	328.3	GO:0032222;GO:0048511;GO:0045187;GO:0030431;GO:1903818;GO:0016021;GO:0005886;GO:0031225;GO:0034235	BP:regulation of synaptic transmission, cholinergic;BP:rhythmic process;BP:regulation of circadian sleep/wake cycle, sleep;BP:sleep;BP:positive regulation of voltage-gated potassium channel activity;CC:integral component of membrane;CC:plasma membrane;CC:anchored component of membrane;MF:GPI anchor binding;	------	------	------	------	------	------	------	------	PF17064	QVR	Sleepless protein
TRINITY_DN23432_c0_g1	-2.58706	3.01567e-06	3.8497e-05	down	-5.52464	2.44518e-10	6.96837e-09	down		363.2	------	------	------	------	------	------	------	------	------	------	------	------	------
TRINITY_DN23432_c0_g2	-3.44488	5.82256e-09	1.64769e-07	down	-4.56346	1.42052e-10	4.27909e-09	down	PREDICTED: uncharacterized protein LOC109545682 [Dendroctonus ponderosae]	28.72	GO:0034453;GO:0005856;GO:0036064;GO:0031514;GO:0005814;GO:0005879;GO:0036126;GO:0008017	BP:microtubule anchoring;CC:cytoskeleton;CC:ciliary basal body;CC:motile cilium;CC:centriole;CC:axonemal microtubule;CC:sperm flagellum;MF:microtubule binding;	------	------	------	------	ENOG410XS0C	S:Function unknown	------	------	PF05217	STOP	STOP protein
TRINITY_DN23442_c1_g1	-2.76343	0.000158435	0.00112579	down	4.38741	0.000119651	0.000779118	up		71.39	------	------	------	------	------	------	------	------	------	------	------	------	------
TRINITY_DN23443_c0_g1	-1.69062	0.00048934	0.00289147	down	-3.23105	3.56733e-08	6.21437e-07	down	PREDICTED: death-associated protein kinase related [Dendroctonus ponderosae]	83.11	GO:0005634;GO:0004674;GO:0016301;GO:0005524;GO:0004672	CC:nucleus;MF:protein serine/threonine kinase activity;MF:kinase activity;MF:ATP binding;MF:protein kinase activity;	K08804	STK17	------	------	ENOG410XRMJ	T:Signal transduction mechanisms	sp|Q0KHT7|DAPKR_DROME;	Death-associated protein kinase related OS=Drosophila melanogaster OX=7227 GN=Drak PE=1 SV=2;	PF00069;PF07714;PF06293	Pkinase;Pkinase_Tyr;Kdo	Protein kinase domain;Protein tyrosine kinase;Lipopolysaccharide kinase
TRINITY_DN23444_c0_g1	-3.48872	2.76432e-10	1.08777e-08	down	-3.8051	1.00527e-06	1.21183e-05	down	unknown [Dendroctonus ponderosae]	49.85	GO:0006508;GO:0043171;GO:0005615;GO:0004180;GO:0070573	BP:proteolysis;BP:peptide catabolic process;CC:extracellular space;MF:carboxypeptidase activity;MF:metallodipeptidase activity;	K01302	CPQ	------	------	COG2234	S:Function unknown	sp|Q5RDN7|CBPQ_PONAB;	Carboxypeptidase Q OS=Pongo abelii OX=9601 GN=CPQ PE=2 SV=1;	PF04389;PF02225;PF01546	Peptidase_M28;PA;Peptidase_M20	Peptidase family M28;PA domain;Peptidase family M20/M25/M40
TRINITY_DN23456_c0_g1	2.14114	1.32825e-07	2.58929e-06	up	-1.77818	0.000174696	0.001079	down	PREDICTED: sodium-dependent dopamine transporter [Dendroctonus ponderosae]	38.14	GO:0016021;GO:0005328	CC:integral component of membrane;MF:neurotransmitte;	K05036	SLC6A3	map05012;map05034;map05030;map05031;map04728	Parkinson's disease;Alcoholism;Cocaine addiction;Amphetamine addiction;Dopaminergic synapse	COG0733	P:Inorganic ion transport and metabolism	sp|Q7K4Y6|DAT_DROME;	Sodium-dependent dopamine transporter OS=Drosophila melanogaster OX=7227 GN=DAT PE=1 SV=1;	PF00209	SNF	Sodiu
TRINITY_DN23456_c0_g2	-3.46957	4.59721e-06	5.56072e-05	down	-2.93873	0.00188138	0.00809876	down	PREDICTED: uncharacterized protein LOC109546786 isoform X1 [Dendroctonus ponderosae]	6.1	GO:0016021;GO:0016301;GO:0005524	CC:integral component of membrane;MF:kinase activity;MF:ATP binding;	------	------	------	------	COG0574;ENOG4111AZR	O:Posttranslational modification, protein turnover, chaperones;	------	------	------	------	------
TRINITY_DN23463_c0_g1	-1.48482	4.86734e-06	5.82598e-05	down	1.18525	0.00194561	0.00834178	up	hypothetical protein D910_03334, partial [Dendroctonus ponderosae]	48.53	GO:0006470;GO:0004725	BP:protein dephosphorylation;MF:protein tyrosine phosphatase activity;	K18038	PTPN9, MEG2	------	------	COG5599	T:Signal transduction mechanisms	sp|Q641Z2|PTN9_RAT;	Tyrosine-protein phosphatase non-receptor type 9 OS=Rattus norvegicus OX=10116 GN=Ptpn9 PE=2 SV=1;	PF00102;PF00650;PF13716	Y_phosphatase;CRAL_TRIO;CRAL_TRIO_2	Protein-tyrosine phosphatase;CRAL/TRIO domain;Divergent CRAL/TRIO domain
TRINITY_DN23465_c0_g1	-2.82745	1.12889e-06	1.64903e-05	down	-4.32297	1.6881e-12	7.54639e-11	down	PREDICTED: frizzled-2 [Dendroctonus ponderosae] >ENN75149.1 hypothetical protein YQE_08262, partial [Dendroctonus ponderosae]	15.48	GO:0016055;GO:0060070;GO:0007166;GO:0007275;GO:0035567;GO:0016021;GO:0005886;GO:0042813;GO:0004888;GO:0017147	BP:Wnt signaling pathway;BP:canonical Wnt signaling pathway;BP:cell surface receptor signaling pathway;BP:multicellular organism development;BP:non-canonical Wnt signaling pathway;CC:integral component of membrane;CC:plasma membrane;MF:Wnt-activated receptor activity;MF:transmembrane signaling receptor activity;MF:Wnt-protein binding;	K02375	FZD5_8, fz2	map05205;map04390;map05200;map04550;map05217;map04310;map05224;map04150;map04916	Proteoglycans in cancer;Hippo signaling pathway;Pathways in cancer;Signaling pathways regulating pluripotency of stem cells;Basal cell carcinoma;Wnt signaling pathway;Breast cancer;mTOR signaling pathway;Melanogenesis	ENOG410XRC8	E:Amino acid transport and metabolism	sp|Q9VVX3|FRIZ2_DROME;	Frizzled-2 OS=Drosophila melanogaster OX=7227 GN=fz2 PE=1 SV=1;	PF01534;PF01392	Frizzled;Fz	Frizzled/Smoothened family membrane region;Fz domain
TRINITY_DN23476_c0_g1	-1.66031	0.000654526	0.00367082	down	2.73656	0.000699766	0.00353057	up	PREDICTED: uncharacterized protein LOC109540336 isoform X2 [Dendroctonus ponderosae]	7.44	GO:0045743;GO:0045742;GO:0007165;GO:0017016	BP:positive regulation of fibroblast growth factor receptor signaling pathway;BP:positive regulation of epidermal growth factor receptor signaling pathway;BP:signal transduction;MF:Ras GTPase binding;	------	------	------	------	ENOG410ZR0G	S:Function unknown	------	------	PF00788	RA	Ras association
TRINITY_DN23487_c0_g1	-1.74528	0.000464269	0.0027677	down	-2.75317	0.00228414	0.00951805	down	PREDICTED: multiple C2 and transmembrane domain-containing protein 1 isoform X2 [Dendroctonus ponderosae]	11.98	GO:0016021;GO:0030672	CC:integral component of membrane;CC:synaptic vesicle membrane;	------	------	------	------	COG5038;ENOG410XRQN	S:Function unknown;	sp|A1ZBD6|MCTP_DROME;	Multiple C2 and transmembrane domain-containing protein OS=Drosophila melanogaster OX=7227 GN=Mctp PE=1 SV=3;	PF00168;PF08372;PF06398	C2;PRT_C;Pex24p	C2 domain;Plant phosphoribosyltransferase C-terminal;Integral peroxisomal membrane peroxin
TRINITY_DN23488_c0_g1	2.37823	3.20358e-05	0.000292458	up	2.80656	0.00141081	0.00638663	up	PREDICTED: uncharacterized protein LOC109539658 [Dendroctonus ponderosae] >ENN75468.1 hypothetical protein YQE_08017, partial [Dendroctonus ponderosae] >ERL90095.1 hypothetical protein D910_07449 [Dendroctonus ponderosae]	10.05	------	------	------	------	------	------	------	------	------	------	------	------	------
TRINITY_DN23488_c1_g1	-1.13462	0.000924316	0.00489398	down	1.52366	0.00104499	0.00495309	up	PREDICTED: myb-related protein B isoform X1 [Dendroctonus ponderosae]	28.39	GO:0000278;GO:0045893;GO:0005634;GO:0003677	BP:mitotic cell cycle;BP:positive regulation of transcription, DNA-templated;CC:nucleus;MF:DNA binding;	K09420	MYB, C-MYB	map04151	PI3K-Akt signaling pathway	COG5147;COG1100	K:Transcription;S:Function unknown	sp|P04197|MYB_DROME;	Myb protein OS=Drosophila melanogaster OX=7227 GN=Myb PE=1 SV=2;	PF00249;PF13921;PF09316;PF15963	Myb_DNA-binding;Myb_DNA-bind_6;Cmyb_C;Myb_DNA-bind_7	Myb-like DNA-binding domain;Myb-like DNA-binding domain;C-myb, C-terminal;Myb DNA-binding like
TRINITY_DN23500_c0_g1	3.34434	3.31892e-06	4.19725e-05	up	2.96949	1.14168e-07	1.76248e-06	up		1.31	------	------	------	------	------	------	------	------	------	------	------	------	------
TRINITY_DN23505_c1_g4	3.79554	0.000340888	0.00213247	up	6.41848	4.51206e-05	0.000335079	up		0.13	------	------	------	------	------	------	------	------	------	------	------	------	------
TRINITY_DN23515_c0_g1	-1.68932	0.00120375	0.00606612	down	2.70691	2.44891e-08	4.48e-07	up	PREDICTED: tetraspanin-5-like isoform X1 [Dendroctonus ponderosae] >XP_019764781.1 PREDICTED: tetraspanin-5-like isoform X1 [Dendroctonus ponderosae] >XP_019768325.1 PREDICTED: tetraspanin-5-like isoform X1 [Dendroctonus ponderosae] >XP_019768326.1 PREDICTED: tetraspanin-5-like isoform X1 [Dendroctonus ponderosae]	35.9	GO:0016021;GO:0005887	CC:integral component of membrane;CC:integral component of plasma membrane;	K17345	TSPAN5	------	------	ENOG4111IRY	S:Function unknown	sp|Q17QJ5|TSN5_BOVIN;	Tetraspanin-5 OS=Bos taurus OX=9913 GN=TSPAN5 PE=1 SV=1;	PF00335	Tetraspanin	Tetraspanin family
TRINITY_DN23520_c3_g5	2.96821	2.5514e-05	0.000239518	up	4.71863	2.50137e-07	3.54212e-06	up		38.48	------	------	------	------	------	------	------	------	------	------	------	------	------
TRINITY_DN23520_c3_g8	3.08152	0.00042891	0.00259459	up	6.70408	1.17417e-05	0.000105406	up		0.28	------	------	------	------	------	------	------	------	------	------	------	------	------
TRINITY_DN23524_c0_g1	-6.11754	1.19172e-05	0.000125688	down	-5.78305	2.07173e-05	0.000170362	down	hypothetical protein D910_06777 [Dendroctonus ponderosae]	6.3	GO:0071555;GO:0005975;GO:0005576;GO:0004650	BP:cell wall organization;BP:carbohydrate metabolic process;CC:extracellular region;MF:polygalacturonase activity;	K01213;K01184	E3.2.1.67;E3.2.1.15	map00040	Pentose and glucuronate interconversions	COG5434	M:Cell wall/membrane/envelope biogenesis	sp|O97400|PGLR_PHACE;	Polygalacturonase OS=Phaedon cochleariae OX=80249 PE=2 SV=1;	PF00295;PF13229	Glyco_hydro_28;Beta_helix	Glycosyl hydrolases family 28;Right handed beta helix region
TRINITY_DN23525_c0_g2	-1.669	4.85115e-05	0.00041337	down	-3.12078	1.51112e-05	0.000130026	down	PREDICTED: uncharacterized protein LOC109539536 [Dendroctonus ponderosae]	54.03	------	------	K17501	PPM1E, POPX1	------	------	ENOG410XYW3	S:Function unknown	------	------	PF07145	PAM2	Ataxin-2 C-terminal region
TRINITY_DN23537_c1_g1	-2.83053	4.79623e-06	5.75841e-05	down	-5.49175	1.6987e-33	2.06551e-30	down	PREDICTED: bifunctional glutamate/proline--tRNA ligase [Dendroctonus ponderosae]	11.5	GO:0006424;GO:0006433;GO:0005737;GO:0004827;GO:0004818;GO:0005524	BP:glutamyl-tRNA aminoacylation;BP:prolyl-tRNA aminoacylation;CC:cytoplasm;MF:proline-tRNA ligase activity;MF:glutamate-tRNA ligase activity;MF:ATP binding;	K14163	EPRS	map00860;map00970	Porphyrin and chlorophyll metabolism;Aminoacyl-tRNA biosynthesis	COG0442	J:Translation, ribosomal structure and biogenesis	sp|P28668|SYEP_DROME;	Bifunctional glutamate/proline--tRNA ligase OS=Drosophila melanogaster OX=7227 GN=GluProRS PE=1 SV=2;	PF00749;PF00458;PF03950;PF00043	tRNA-synt_1c;WHEP-TRS;tRNA-synt_1c_C;GST_C	tRNA synthetases class I;WHEP-TRS domain;tRNA synthetases class I;Glutathione S-transferase, C-terminal domain
TRINITY_DN23540_c0_g2	-4.68797	4.10391e-14	3.68896e-12	down	-2.24528	0.000292625	0.00168419	down	hypothetical protein D910_10145 [Dendroctonus ponderosae]	9.39	GO:0007424;GO:0040005;GO:0044719;GO:0007475;GO:0008362;GO:0016021;GO:0005634;GO:0003700;GO:0005509;GO:0008270	BP:open tracheal system development;BP:chitin-based cuticle attachment to epithelium;BP:regulation of imaginal disc-derived wing size;BP:apposition of dorsal and ventral imaginal disc-derived wing surfaces;BP:chitin-based embryonic cuticle biosynthetic process;CC:integral component of membrane;CC:nucleus;MF:transcription factor activity, sequence-specific DNA binding;MF:calcium ion binding;MF:zin…	------	------	------	------	ENOG410XSTY;ENOG410XP6K	S:Function unknown;	------	------	PF12947	EGF_3	EGF domain
TRINITY_DN23550_c0_g2	2.64911	6.59089e-10	2.41719e-08	up	-1.12432	1.9771e-11	7.18332e-10	down	PREDICTED: probable ATP-dependent RNA helicase CG8611 [Dendroctonus ponderosae]	4.73	GO:0003723;GO:0005524;GO:0004386	MF:RNA binding;MF:ATP binding;MF:helicase activity;	K14806	DDX31, DBP7	------	------	ENOG410XNT7	L:Replication, recombination and repair	sp|Q86B47|Y8611_DROME;	Probable ATP-dependent RNA helicase CG8611 OS=Drosophila melanogaster OX=7227 GN=CG8611 PE=1 SV=1;	PF13959;PF00271	DUF4217;Helicase_C	Domain of unknown function;Helicase conserved C-terminal domain
TRINITY_DN23556_c0_g1	-2.62763	6.96066e-09	1.92809e-07	down	3.17032	3.55447e-08	6.20382e-07	up	PREDICTED: guanine nucleotide-binding protein subunit gamma-e [Dendroctonus ponderosae] >XP_019761110.1 PREDICTED: guanine nucleotide-binding protein subunit gamma-e [Dendroctonus ponderosae] >XP_019761111.1 PREDICTED: guanine nucleotide-binding protein subunit gamma-e [Dendroctonus ponderosae] >ENN76519.1 hypothetical protein YQE_06970, partial [Dendroctonus ponderosae] >ERL95350.1 hypothetical …	66.52	GO:0007200;GO:0050909;GO:0005834;GO:0003924	BP:phospholipase C-activating G-protein coupled receptor signaling pathway;BP:sensory perception of taste;CC:heterotrimeric G-protein complex;MF:GTPase activity;	K04547	GNG13	map04724;map04726;map05200;map04014;map04727;map04151;map04713;map04723;map04728;map05034;map04740;map04725;map04742;map04745;map04062;map05032	Glutamatergic synapse;Serotonergic synapse;Pathways in cancer;Ras signaling pathway;GABAergic synapse;PI3K-Akt signaling pathway;Circadian entrainment;Retrograde endocannabinoid signaling;Dopaminergic synapse;Alcoholism;Olfactory transduction;Cholinergic synapse;Taste transduction;Phototransduction - fly;Chemokine signaling pathway;Morphine addiction	ENOG41122JF	S:Function unknown	sp|Q9NFZ3|GBGE_DROME;	Guanine nucleotide-binding protein subunit gamma-e OS=Drosophila melanogaster OX=7227 GN=Ggamma30A PE=1 SV=1;	PF00631	G-gamma	GGL domain
TRINITY_DN23566_c0_g1	2.37193	1.53189e-05	0.000155541	up	4.66205	4.01185e-09	8.8372e-08	up	PREDICTED: RB-associated KRAB zinc finger protein-like [Dendroctonus ponderosae]	0.83	GO:0003676	MF:nucleic acid binding;	------	------	------	------	COG5048	S:Function unknown	sp|Q7KQZ4|LOLA3_DROME;	Longitudinals lacking protein, isoforms A/B/D/L OS=Drosophila melanogaster OX=7227 GN=lola PE=1 SV=1;	PF00096;PF18868	zf-C2H2;zf-C2H2_3rep	Zinc finger, C2H2 type;Zinc finger C2H2-type, 3 repeats
TRINITY_DN23577_c0_g1	-1.82728	0.000258546	0.00169755	down	-3.38137	7.14602e-09	1.50406e-07	down	PREDICTED: zinc finger protein Xfin-like [Dendroctonus ponderosae] >XP_019769127.1 PREDICTED: zinc finger protein Xfin-like [Dendroctonus ponderosae]	10.62	GO:0006355;GO:0005634;GO:0046872;GO:0003676;GO:0003677	BP:regulation of transcription, DNA-templated;CC:nucleus;MF:metal ion binding;MF:nucleic acid binding;MF:DNA binding;	------	------	------	------	COG5048	K:Transcription	------	------	PF13909	zf-H2C2_5	C2H2-type zinc-finger domain
TRINITY_DN23592_c1_g1	-2.41179	8.13783e-06	9.09176e-05	down	-2.50384	1.21632e-06	1.43126e-05	down	hypothetical protein D910_10541 [Dendroctonus ponderosae]	6.74	------	------	------	------	------	------	------	------	------	------	------	------	------
TRINITY_DN23602_c1_g7	2.41356	9.0863e-06	9.99711e-05	up	2.73294	9.34979e-15	6.50881e-13	up		4.45	------	------	------	------	------	------	------	------	------	------	------	------	------
TRINITY_DN23603_c0_g1	1.51742	3.10582e-05	0.000285142	up	2.83593	2.09294e-05	0.000172029	up	PREDICTED: uncharacterized protein LOC109545178 isoform X2 [Dendroctonus ponderosae]	13.97	------	------	------	------	------	------	ENOG4111J7C	S:Function unknown	sp|Q6AYP4|ZC21C_RAT;	Zinc finger C2HC domain-containing protein 1C OS=Rattus norvegicus OX=10116 GN=Zc2hc1c PE=2 SV=1;	PF13913	zf-C2HC_2	zinc-finger of a C2HC-type
TRINITY_DN23608_c0_g3	-1.7519	0.00165546	0.00786986	down	3.99859	9.10722e-07	1.11034e-05	up	hypothetical protein YQE_03565, partial [Dendroctonus ponderosae]	138.11	GO:0016787	MF:hydrolase activity;	------	------	------	------	------	------	------	------	------	------	------
TRINITY_DN23609_c0_g1	-4.72913	9.15006e-09	2.47962e-07	down	-10.3105	2.78124e-14	1.7432e-12	down	hypothetical protein YQE_03565, partial [Dendroctonus ponderosae]	4.72	GO:0016787	MF:hydrolase activity;	------	------	------	------	COG2272	I:Lipid transport and metabolism	sp|P35502|ESTF_MYZPE;	Esterase FE4 OS=Myzus persicae OX=13164 PE=1 SV=1;	PF00135;PF07859;PF00326	COesterase;Abhydrolase_3;Peptidase_S9	Carboxylesterase family;alpha/beta hydrolase fold;Prolyl oligopeptidase family
TRINITY_DN23609_c0_g2	-4.87162	0.000456622	0.00272862	down	-9.18032	2.53479e-08	4.61859e-07	down	hypothetical protein YQE_03565, partial [Dendroctonus ponderosae]	2.23	GO:0016787	MF:hydrolase activity;	------	------	------	------	COG2272	I:Lipid transport and metabolism	------	------	PF00135	COesterase	Carboxylesterase family
TRINITY_DN23609_c0_g3	-2.62736	0.000135891	0.000988839	down	-9.61887	1.37198e-11	5.13832e-10	down	PREDICTED: esterase E4-like [Dendroctonus ponderosae] >AEE63631.1 unknown [Dendroctonus ponderosae]	5.3	GO:0016787	MF:hydrolase activity;	------	------	------	------	COG2272	I:Lipid transport and metabolism	------	------	PF00135	COesterase	Carboxylesterase family
TRINITY_DN23609_c0_g4	-3.1563	8.37425e-07	1.27564e-05	down	-7.5897	5.46489e-29	4.15309e-26	down	PREDICTED: uncharacterized protein LOC109534176 [Dendroctonus ponderosae]	9.32	GO:0016787	MF:hydrolase activity;	------	------	------	------	COG2272	I:Lipid transport and metabolism	sp|Q64419|EST1_MESAU;	Liver carboxylesterase OS=Mesocricetus auratus OX=10036 PE=2 SV=1;	PF00135;PF07859	COesterase;Abhydrolase_3	Carboxylesterase family;alpha/beta hydrolase fold
TRINITY_DN23609_c0_g5	-5.726	1.14908e-08	3.03616e-07	down	-9.92932	1.5765e-08	3.02353e-07	down	hypothetical protein YQE_03565, partial [Dendroctonus ponderosae]	4.29	GO:0016787	MF:hydrolase activity;	------	------	------	------	COG2272	I:Lipid transport and metabolism	sp|P35502|ESTF_MYZPE;	Esterase FE4 OS=Myzus persicae OX=13164 PE=1 SV=1;	PF00135;PF07859;PF00326	COesterase;Abhydrolase_3;Peptidase_S9	Carboxylesterase family;alpha/beta hydrolase fold;Prolyl oligopeptidase family
TRINITY_DN23612_c0_g4	-2.64226	2.74717e-07	4.82527e-06	down	-2.94799	0.000926909	0.00446506	down	hypothetical protein D910_02218 [Dendroctonus ponderosae]	49.27	GO:0004252	MF:serine-type endopeptidase activity;	K09635;K01312	TMPRSS4;PRSS1_2_3	map04972;map04080;map05164;map04974	Pancreatic secretion;Neuroactive ligand-receptor interaction;Influenza A;Protein digestion and absorption	COG5640	O:Posttranslational modification, protein turnover, chaperones	sp|P29786|TRY3_AEDAE;	Trypsin 3A1 OS=Aedes aegypti OX=7159 GN=AAEL007818 PE=2 SV=2;	PF00089;PF09342;PF13365	Trypsin;DUF1986;Trypsin_2	Trypsin;Domain of unknown function;Trypsin-like peptidase domain
TRINITY_DN23613_c0_g1	-3.94398	4.04632e-13	2.92121e-11	down	-2.4313	1.32242e-05	0.000116464	down	PREDICTED: glyoxylate reductase/hydroxypyruvate reductase-like isoform X1 [Dendroctonus ponderosae] >AEE62659.1 unknown [Dendroctonus ponderosae]	92.64	GO:0005829;GO:0016616;GO:0016618;GO:0051287;GO:0030267;GO:0008465	CC:cytosol;MF:oxidoreductase activity, acting on the CH-OH group of donors, NAD or NADP as acceptor;MF:hydroxypyruvate reductase activity;MF:NAD binding;MF:glyoxylate reductas;MF:glycerate dehydrogenase activity;	K00049	GRHPR	map00630;map00260;map00620	Glyoxylate and dicarboxylate metabolism;Glycine, serine and threonine metabolism;Pyruvate metabolism	COG1052	C:Energy production and conversion	sp|Q9UBQ7|GRHPR_HUMAN;	Glyoxylate reductase/hydroxypyruvate reductase OS=Homo sapiens OX=9606 GN=GRHPR PE=1 SV=1;	PF02826;PF00389;PF03807;PF03446;PF07991;PF00670	2-Hacid_dh_C;2-Hacid_dh;F420_oxidored;NAD_binding_2;IlvN;AdoHcyase_NAD	D-isomer specific 2-hydroxyacid dehydrogenase, NAD binding domain;D-isomer specific 2-hydroxyacid dehydrogenase, catalytic domain;NADP oxidoreductase coenzyme F420-dependent;NAD binding domain of 6-phosphogluconate dehydrogenase;Acetohydroxy acid isomeroreductase, NADPH-binding domain;S-adenosyl-L-homocysteine hydrolase, NAD binding domain
TRINITY_DN23614_c0_g2	-3.08429	5.47188e-06	6.47075e-05	down	-4.41055	6.29419e-10	1.60111e-08	down	hypothetical protein D910_03201 [Dendroctonus ponderosae]	3.23	------	------	K14972	PAXIP1, PTIP	------	------	ENOG410ZXM4;ENOG4111RPS;ENOG410ZZTF;ENOG410XSGS;ENOG410ZRKR	S:Function unknown;K:Transcription;K:Transcription	sp|Q90WJ3|PAXI1_XENLA;	PAX-interacting protein 1 OS=Xenopus laevis OX=8355 GN=paxip1 PE=1 SV=1;	PF12738;PF00533;PF16589	PTCB-BRCT;BRCT;BRCT_2	twin BRCT domain;BRCA1 C Terminus;BRCT domain, a BRCA1 C-terminus domain
TRINITY_DN23624_c1_g1	-3.3763	1.0704e-09	3.70812e-08	down	-3.06906	1.33151e-05	0.000117151	down	PREDICTED: CREB-binding protein isoform X5 [Dendroctonus ponderosae]	7.31	GO:0006355;GO:0000123;GO:0003713;GO:0004402;GO:0008270	BP:regulation of transcription, DNA-templated;CC:histone acetyltransferase complex;MF:transcription coactivator activity;MF:histone acetyltransferase activity;MF:zinc ion binding;	K04498	EP300, CREBBP, KAT3	map04110;map05166;map05164;map05211;map05161;map04350;map05168;map04330;map04310;map05215;map04922;map05016;map04720;map05152;map05206;map05203;map05200;map04024;map04066;map04068;map04919;map04630;map04520;map04916	Cell cycle;HTLV-I infection;Influenza A;Renal cell carcinoma;Hepatitis B;TGF-beta signaling pathway;Herpes simplex infection;Notch signaling pathway;Wnt signaling pathway;Prostate cancer;Glucagon signaling pathway;Huntington's disease;Long-term potentiation;Tuberculosis;MicroRNAs in cancer;Viral carcinogenesis;Pathways in cancer;cAMP signaling pathway;HIF-1 signaling pathway;FoxO signaling pathwa…	COG5076;ENOG410XPJ0	S:Function unknown;B:Chromatin structure and dynamics	sp|B2RWS6|EP300_MOUSE;	Histone acetyltransferase p300 OS=Mus musculus OX=10090 GN=Ep300 PE=1 SV=2;	PF02172;PF02135;PF16987	KIX;zf-TAZ;KIX_2	KIX domain;TAZ zinc finger;KIX domain
TRINITY_DN23628_c5_g1	3.25993	0.000394559	0.00241655	up	4.67462	6.73309e-07	8.45181e-06	up	hypothetical protein YQE_03771, partial [Dendroctonus ponderosae] >ERL83859.1 hypothetical protein D910_01126 [Dendroctonus ponderosae] >ERL84260.1 hypothetical protein D910_01641 [Dendroctonus ponderosae]	3.2	------	------	------	------	------	------	------	------	------	------	------	------	------
TRINITY_DN23639_c1_g10	-3.96717	0.000259089	0.00170043	down	-3.41708	0.00238117	0.00984366	down	hypothetical protein D910_12558 [Dendroctonus ponderosae]	5.06	GO:0030246	MF:carbohydrate binding;	------	------	------	------	------	------	------	------	------	------	------
TRINITY_DN23651_c0_g1	-3.34563	0.000321253	0.00203135	down	-3.08748	9.30831e-05	0.000625089	down	unknown [Dendroctonus ponderosae]	7.21	GO:0016021;GO:0022857	CC:integral component of membrane;MF:transmembrane transporter activity;	K08145	SLC2A8, GLUT8	------	------	ENOG410XNQK	G:Carbohydrate transport and metabolism	sp|A9ZSY3|TRET1_BOMMO;	Facilitated trehalose transporter Tret1 OS=Bombyx mori OX=7091 GN=Tret1 PE=1 SV=1;	PF00083;PF07690	Sugar_tr;MFS_1	Sugar;Major Facilitator Superfamily
TRINITY_DN23664_c1_g1	-2.5649	1.22057e-11	6.43162e-10	down	-2.71563	3.44089e-27	1.69617e-24	down	hypothetical protein YQE_08713, partial [Dendroctonus ponderosae]	269.71	------	------	------	------	------	------	------	------	------	------	------	------	------
TRINITY_DN23667_c1_g1	1.55824	4.69414e-05	0.000402541	up	4.38553	1.0503e-18	1.38815e-16	up		16.51	------	------	------	------	------	------	------	------	------	------	------	------	------
TRINITY_DN23675_c0_g2	-1.39005	0.000224089	0.00150043	down	2.44974	1.53924e-05	0.000132239	up	PREDICTED: gamma-interferon-inducible lysosomal thiol reductase-like [Dendroctonus ponderosae] >AEE62714.1 unknown [Dendroctonus ponderosae]	21.61	GO:0016021	CC:integral component of membrane;	K08059	IFI30, GILT	map04612	Antigen processing and presentation	ENOG4111IDT	S:Function unknown	sp|Q95RA9|GILT1_DROME;	GILT-like protein 1 OS=Drosophila melanogaster OX=7227 GN=GILT1 PE=1 SV=1;	PF03227	GILT	Gamma interferon inducible lysosomal thiol reductase
TRINITY_DN23689_c2_g1	2.42709	0.000668263	0.00373375	up	6.50703	7.35703e-05	0.000510015	up		0.29	------	------	------	------	------	------	------	------	------	------	------	------	------
TRINITY_DN23706_c1_g1	-2.40567	2.65239e-05	0.000247899	down	-7.20184	2.40968e-15	1.86229e-13	down	PREDICTED: uncharacterized protein LOC109534176 [Dendroctonus ponderosae]	54.14	GO:0016787	MF:hydrolase activity;	------	------	------	------	COG2272	I:Lipid transport and metabolism	sp|Q64419|EST1_MESAU;	Liver carboxylesterase OS=Mesocricetus auratus OX=10036 PE=2 SV=1;	PF00135;PF07859	COesterase;Abhydrolase_3	Carboxylesterase family;alpha/beta hydrolase fold
TRINITY_DN23716_c0_g1	-2.22151	0.000666702	0.0037273	down	-5.6952	3.53992e-08	6.18435e-07	down	hypothetical protein D910_00216 [Dendroctonus ponderosae]	8.02	GO:0016021;GO:0005887;GO:0022857;GO:0005351	CC:integral component of membrane;CC:integral component of plasma membrane;MF:transmembrane transporter activity;MF:suga;	K08145	SLC2A8, GLUT8	------	------	ENOG410XNQK	G:Carbohydrate transport and metabolism	sp|Q17NV8|TRET1_AEDAE;	Facilitated trehalose transporter Tret1 OS=Aedes aegypti OX=7159 GN=Tret1 PE=3 SV=1;	PF00083;PF07690	Sugar_tr;MFS_1	Sugar;Major Facilitator Superfamily
TRINITY_DN23723_c1_g2	1.71834	0.000236001	0.00157064	up	1.59544	3.13467e-09	7.01513e-08	up	PREDICTED: putative inositol monophosphatase 3 [Dendroctonus ponderosae] >AEE63322.1 unknown [Dendroctonus ponderosae]	7.55	GO:0046854;GO:0016021;GO:0008254	BP:phosphatidylinositol phosphorylation;CC:integral component of membrane;MF:3'-nucleotidase activity;	K15759	IMPAD1, IMPA3	map04070;map00920;map00562	Phosphatidylinositol signaling system;Sulfur metabolism;Inositol phosphate metabolism	COG1218;COG0483	P:Inorganic ion transport and metabolism;	sp|Q29JH0|IMPA3_DROPS;	Putative inositol monophosphatase 3 OS=Drosophila pseudoobscura pseudoobscura OX=46245 GN=GA13929 PE=3 SV=2;	PF00459	Inositol_P	Inositol monophosphatase family
TRINITY_DN23724_c2_g4	-1.88087	2.56657e-06	3.33788e-05	down	-3.09088	5.44394e-09	1.16952e-07	down	unknown [Dendroctonus ponderosae] >ERL93846.1 hypothetical protein D910_11132 [Dendroctonus ponderosae]	27.4	GO:0016021;GO:0016758;GO:0015020	CC:integral component of membrane;MF:transferase activity, transferring hexosyl groups;MF:glucuronosyltransferase activity;	K00699	UGT	map05204;map00983;map00982;map00980;map00040;map00860;map00053;map00830;map00140	Chemical carcinogenesis;Drug metabolism - other enzymes;Drug metabolism - cytochrome P450;Metabolism of xenobiotics by cytochrome P450;Pentose and glucuronate interconversions;Porphyrin and chlorophyll metabolism;Ascorbate and aldarate metabolism;Retinol metabolism;Steroid hormone biosynthesis	COG1819	S:Function unknown	sp|O60656|UD19_HUMAN;	UDP-glucuronosyltransferase 1-9 OS=Homo sapiens OX=9606 GN=UGT1A9 PE=1 SV=1;	PF00201;PF04101	UDPGT;Glyco_tran_28_C	UDP-glucoronosyl and UDP-glucosyl transferase;Glycosyltransferase family 28 C-terminal domain
TRINITY_DN23743_c1_g4	2.71535	4.04243e-05	0.00035513	up	4.31703	2.5041e-06	2.70558e-05	up		1.07	------	------	------	------	------	------	------	------	------	------	------	------	------
TRINITY_DN23746_c1_g5	5.61983	6.35287e-05	0.000518453	up	6.98123	2.31696e-06	2.532e-05	up		0	------	------	------	------	------	------	------	------	------	------	------	------	------
TRINITY_DN23754_c0_g5	1.54921	0.000795304	0.00431813	up	3.1822	1.76665e-05	0.000149313	up	hypothetical protein YQE_05525, partial [Dendroctonus ponderosae] >ERL85927.1 hypothetical protein D910_03342 [Dendroctonus ponderosae]	6.49	GO:0007186;GO:0005834;GO:0003924;GO:0003677	BP:G-protein coupled receptor signaling pathway;CC:heterotrimeric G-protein complex;MF:GTPase activity;MF:DNA binding;	------	------	------	------	ENOG41105FN	S:Function unknown	------	------	PF05485	THAP	THAP domain
TRINITY_DN23761_c0_g1	2.4878	0.000465421	0.00277397	up	2.96734	0.000804848	0.00397069	up	PREDICTED: uncharacterized protein LOC109532718 [Dendroctonus ponderosae]	2.34	GO:0055085;GO:0016021	BP:transmembrane transport;CC:integral component of membrane;	K20840	SLC46A3	------	------	ENOG410ZVCA	G:Carbohydrate transport and metabolism	------	------	PF07690	MFS_1	Major Facilitator Superfamily
TRINITY_DN23784_c0_g1	1.6909	6.30013e-06	7.28115e-05	up	-1.76974	3.7173e-09	8.21816e-08	down	hypothetical protein D910_12830 [Dendroctonus ponderosae]	7.79	GO:0006401;GO:0006396;GO:0000178;GO:0003951	BP:RNA catabolic process;BP:RNA processing;CC:exosom;MF:NAD+ kinase activity;	K09881;K12586	AGK;RRP43, EXOSC8, OIP2	map03018;map00561	RNA degradation;Glycerolipid metabolism	COG2123;COG1597	J:Translation, ribosomal structure and biogenesis;I:Lipid transport and metabolism	sp|Q96B26|EXOS8_HUMAN;	Exosome complex component RRP43 OS=Homo sapiens OX=9606 GN=EXOSC8 PE=1 SV=1;	PF00781;PF11711	DAGK_cat;Tim54	Diacylglycerol kinase catalytic domain;Inner membrane protein import complex subunit Tim54
TRINITY_DN23808_c0_g1	1.46582	0.000467749	0.00278483	up	-1.95589	4.94642e-05	0.00036232	down	PREDICTED: MLX-interacting protein isoform X1 [Dendroctonus ponderosae]	11.28	GO:1900402;GO:0006357;GO:0005634;GO:0003700;GO:0046983;GO:0000981	BP:regulation of carbohydrate metabolic process by regulation of transcription from RNA polymerase II promoter;BP:regulation of transcription from RNA polymerase II promoter;CC:nucleus;MF:transcription factor activity, sequence-specific DNA binding;MF:protein dimerization activity;MF:RNA polymerase II transcription factor activity, sequence-specific DNA binding;	K09113	MLX	map04932;map04931	Non-alcoholic fatty liver diseas;Insulin resistance	ENOG410XTA5	S:Function unknown	sp|Q2VPU4|MLXIP_MOUSE;	MLX-interacting protein OS=Mus musculus OX=10090 GN=Mlxip PE=1 SV=1;	------	------	------
TRINITY_DN23810_c0_g1	-2.52355	6.19697e-07	9.79619e-06	down	-4.10962	1.02668e-07	1.60597e-06	down	PREDICTED: 28S ribosomal protein S18b, mitochondrial [Dendroctonus ponderosae]	19.54	GO:0032543;GO:0005840;GO:0005739;GO:0003735;GO:0016491	BP:mitochondrial translation;CC:ribosome;CC:mitochondrion;MF:structural constituent of ribosome;MF:oxidoreductase activity;	K16174	MRPS18B, MRPS18-2	map05203	Viral carcinogenesis	ENOG410XZAZ;ENOG4111KH6	S:Function unknown;J:Translation, ribosomal structure and biogenesis	sp|Q9VIP2|PYRD1_DROME;	Pyridine nucleotide-disulfide oxidoreductase domain-containing protein 1 OS=Drosophila melanogaster OX=7227 GN=Pyroxd1 PE=2 SV=1;	PF01084	Ribosomal_S18	Ribosomal protein S18
TRINITY_DN23834_c1_g1	-2.5753	0.000699639	0.00387975	down	4.37561	0.00186238	0.00802837	up	PREDICTED: tigger transposable element-derived protein 6-like [Rhagoletis zephyria]	10.18	GO:0003676;GO:0003677	MF:nucleic acid binding;MF:DNA binding;	------	------	------	------	ENOG4110CDI;ENOG4111HEV	S:Function unknown;	sp|Q96MW7|TIGD1_HUMAN;	Tigger transposable element-derived protein 1 OS=Homo sapiens OX=9606 GN=TIGD1 PE=1 SV=1;	PF03184	DDE_1	DDE superfamily endonuclease
TRINITY_DN23835_c0_g3	5.02588	0.00135407	0.00667833	up	5.02963	0.00145409	0.00654037	up		0	------	------	------	------	------	------	------	------	------	------	------	------	------
TRINITY_DN23840_c1_g4	-4.01157	1.26023e-07	2.4707e-06	down	-4.09738	2.30195e-06	2.5171e-05	down	hypothetical protein D910_06327 [Dendroctonus ponderosae]	27.99	------	------	------	------	------	------	------	------	------	------	PF13855	LRR_8	Leucine rich repeat
TRINITY_DN23850_c0_g1	7.22349	1.37137e-07	2.66014e-06	up	5.97986	0.000996367	0.00474608	up		0.06	------	------	------	------	------	------	------	------	------	------	------	------	------
TRINITY_DN23864_c1_g1	1.79915	0.0010308	0.00534765	up	4.6049	6.48897e-05	0.000460335	up		1.65	------	------	------	------	------	------	------	------	------	------	------	------	------
TRINITY_DN23870_c0_g2	2.19007	7.48119e-05	0.000596457	up	-2.12416	0.000214311	0.00128919	down	PREDICTED: atrial natriuretic peptide receptor 1-like [Dendroctonus ponderosae]	1.41	GO:0007165;GO:0007168;GO:0035556;GO:0006182;GO:0005886;GO:0016021;GO:0004383;GO:0001653;GO:0004672;GO:0005524	BP:signal transduction;BP:receptor guanylyl cyclase signaling pathway;BP:intracellular signal transduction;BP:cGMP biosynthetic process;CC:plasma membrane;CC:integral component of membrane;MF:guanylate cyclase activity;MF:peptide receptor activity;MF:protein kinase activity;MF:ATP binding;	K12323	ANPRA, NPR1	map04024;map00230;map04270;map04921;map04923;map04925;map04924;map04022	cAMP signaling pathway;Purine metabolism;Vascular smooth muscle contraction;Oxytocin signaling pathway;Regulation of lipolysis in adipocytes;Aldosterone synthesis and secretion;Renin secretion;cGMP-PKG signaling pathway	COG2114	S:Function unknown	sp|P16066|ANPRA_HUMAN;	Atrial natriuretic peptide receptor 1 OS=Homo sapiens OX=9606 GN=NPR1 PE=1 SV=1;	PF00211;PF07701	Guanylate_cyc;HNOBA	Adenylate and Guanylate cyclase catalytic domain;Heme NO binding associated
TRINITY_DN23876_c1_g1	2.57375	8.96202e-10	3.18488e-08	up	2.66174	6.1578e-12	2.4511e-10	up	PREDICTED: interferon regulatory factor 2-binding protein-like B isoform X2 [Dendroctonus ponderosae]	26.82	GO:0005634;GO:0001228;GO:0000977	CC:nucleus;MF:transcriptional activator activity, RNA polymerase II transcription regulatory region sequence-specific binding;MF:RNA polymerase II regulatory region sequence-specific DNA binding;	------	------	------	------	ENOG410Z1AW;ENOG410YQ3Z	K:Transcription;S:Function unknown	sp|Q6PCG7|I2BLB_XENLA;	Interferon regulatory factor 2-binding protein-like B OS=Xenopus laevis OX=8355 GN=irf2bpl-b PE=2 SV=1;	PF00097	zf-C3HC4	Zinc finger, C3HC4 type
TRINITY_DN23877_c3_g4	3.12967	0.000638153	0.00359795	up	5.91483	3.01953e-05	0.000237692	up		0.26	------	------	------	------	------	------	------	------	------	------	------	------	------
TRINITY_DN23881_c0_g3	-3.10842	1.06172e-07	2.13789e-06	down	-2.78621	8.33163e-09	1.72683e-07	down	hypothetical protein D910_04003 [Dendroctonus ponderosae]	21.38	GO:0005615;GO:0046872	CC:extracellular space;MF:metal ion binding;	------	------	------	------	ENOG410XVBR	S:Function unknown	------	------	------	------	------
TRINITY_DN23888_c0_g5	-3.33865	0.000278341	0.00180429	down	-7.21283	1.85929e-06	2.08301e-05	down	PREDICTED: polygalacturonase-like [Dendroctonus ponderosae] >AEE62802.1 unknown [Dendroctonus ponderosae]	3.83	GO:0071555;GO:0005975;GO:0005576;GO:0004650	BP:cell wall organization;BP:carbohydrate metabolic process;CC:extracellular region;MF:polygalacturonase activity;	K01213	E3.2.1.67	map00040	Pentose and glucuronate interconversions	COG5434	M:Cell wall/membrane/envelope biogenesis	sp|Q9P358|PGLRA_ASPAW;	Endopolygalacturonase A OS=Aspergillus awamori OX=105351 GN=pgaA PE=1 SV=1;	PF00295	Glyco_hydro_28	Glycosyl hydrolases family 28
TRINITY_DN23892_c0_g1	-4.87429	1.00787e-15	1.23761e-13	down	-7.8588	2.62247e-08	4.75134e-07	down	PREDICTED: uncharacterized protein LOC109541771 [Dendroctonus ponderosae]	294.15	------	------	------	------	------	------	------	------	------	------	PF00041	fn3	Fibronectin type III domain
TRINITY_DN23899_c0_g1	3.82719	1.80578e-05	0.000179314	up	3.81459	0.00142674	0.00644435	up	PREDICTED: golgin subfamily A member 6-like protein 22 isoform X1 [Dendroctonus ponderosae] >ENN72569.1 hypothetical protein YQE_10794, partial [Dendroctonus ponderosae]	0.51	------	------	------	------	------	------	------	------	------	------	------	------	------
TRINITY_DN23905_c2_g1	5.24715	2.02896e-13	1.5589e-11	up	4.80006	4.15637e-07	5.58644e-06	up		0.34	------	------	------	------	------	------	------	------	------	------	------	------	------
TRINITY_DN23907_c1_g5	2.6324	0.000186045	0.00128641	up	6.4486	1.85122e-05	0.000154954	up		0.44	------	------	------	------	------	------	------	------	------	------	------	------	------
TRINITY_DN23911_c2_g4	2.08111	0.000227651	0.00152206	up	1.23177	0.00097979	0.004672	up	hypothetical protein D910_03422 [Dendroctonus ponderosae]	5.13	GO:0006281;GO:0072546;GO:0008094;GO:0005524;GO:0003677	BP:DNA repair;CC:ER membrane protein complex;MF:DNA-dependent ATPase activity;MF:ATP binding;MF:DNA binding;	K08366	BLOC1S4, CNO	------	------	ENOG4111T9K	O:Posttranslational modification, protein turnover, chaperones	sp|Q9VTC2|BL1S4_DROME;	Biogenesis of lysosome-related organelles complex 1 subunit 4 OS=Drosophila melanogaster OX=7227 GN=Blos4 PE=1 SV=1;	PF06160	EzrA	Septation ring formation regulator, EzrA
TRINITY_DN23912_c0_g1	-2.39068	8.85996e-11	3.84388e-09	down	-2.52488	6.50931e-07	8.2515e-06	down	PREDICTED: alanine--tRNA ligase, cytoplasmic isoform X1 [Dendroctonus ponderosae]	15.42	GO:0006419;GO:0006400;GO:0005737;GO:0005739;GO:0004813;GO:0000049;GO:0003676;GO:0016597;GO:0002161;GO:0008270;GO:0003743;GO:0016874;GO:0005524;GO:0005525	BP:alanyl-tRNA aminoacylation;BP:tRNA modification;CC:cytoplasm;CC:mitochondrion;MF:alanine-tRNA ligase activity;MF:tRNA binding;MF:nucleic acid binding;MF:amino acid binding;MF:aminoacyl-tRNA editing activity;MF:zinc ion binding;MF:translation initiation factor activity;MF:ligase activity;MF:ATP binding;MF:GTP binding;	K01872	AARS, alaS	map00970	Aminoacyl-tRNA biosynthesis	COG0013	S:Function unknown	sp|Q9VLM8|SYAC_DROME;	Alanine--tRNA ligase, cytoplasmic OS=Drosophila melanogaster OX=7227 GN=AlaRS PE=2 SV=1;	PF01411;PF02272;PF07973	tRNA-synt_2c;DHHA1;tRNA_SAD	tRNA synthetases class II;DHHA1 domain;Threonyl and Alanyl tRNA synthetase second additional domain
TRINITY_DN23919_c0_g1	-9.43057	1.01187e-09	3.52311e-08	down	-11.4166	4.35579e-19	6.24106e-17	down	PREDICTED: uncharacterized protein LOC109542471, partial [Dendroctonus ponderosae]	728.23	GO:0030245;GO:0016162;GO:0008810	BP:cellulose catabolic process;MF:cellulose 1,4-beta-cellobiosidase activity;MF:cellulase activity;	------	------	------	------	ENOG410XPC9	G:Carbohydrate transport and metabolism	sp|P50899|GUXB_CELFA;	Exoglucanase B OS=Cellulomonas fimi;	PF02011	Glyco_hydro_48	Glycosyl hydrolase family 48
TRINITY_DN23919_c1_g1	-4.3811	1.30595e-12	8.48757e-11	down	-8.32126	3.72151e-13	1.896e-11	down	PREDICTED: uncharacterized protein LOC109540245 [Dendroctonus ponderosae]	118.17	GO:0030245;GO:0008810	BP:cellulose catabolic process;MF:cellulase activity;	------	------	------	------	ENOG410XPC9	G:Carbohydrate transport and metabolism	sp|P50899|GUXB_CELFA;	Exoglucanase B OS=Cellulomonas fimi;	PF02011	Glyco_hydro_48	Glycosyl hydrolase family 48
TRINITY_DN23927_c0_g1	1.85358	0.000726766	0.00401253	up	-1.55661	0.000651447	0.00333381	down	PREDICTED: ankyrin repeat and LEM domain-containing protein 1-like isoform X1 [Dendroctonus ponderosae]	2.98	GO:0004519	MF:endonuclease activity;	K21411	ANKLE1, LEM3	------	------	ENOG41104HP	S:Function unknown	sp|Q8NAG6|ANKL1_HUMAN;	Ankyrin repeat and LEM domain-containing protein 1 OS=Homo sapiens OX=9606 GN=ANKLE1 PE=1 SV=2;	PF03020;PF12796;PF13637	LEM;Ank_2;Ank_4	LEM domain;Ankyrin repeats;Ankyrin repeats
TRINITY_DN23936_c0_g1	1.3101	0.00082633	0.00445929	up	-1.80984	1.36199e-05	0.000119544	down	hypothetical protein D910_08685 [Dendroctonus ponderosae]	27.7	GO:0031047;GO:0003676	BP:gene silencing by RNA;MF:nucleic acid binding;	K11593	ELF2C, AGO	------	------	ENOG410XP07;ENOG410Z0B7	J:Translation, ribosomal structure and biogenesis;S:Function unknown	sp|Q9VUQ5|AGO2_DROME;	Protein argonaute-2 OS=Drosophila melanogaster OX=7227 GN=AGO2 PE=1 SV=3;	PF02171;PF16486;PF16488;PF02170;PF08699;PF16487	Piwi;ArgoN;ArgoL2;PAZ;ArgoL1;ArgoMid	Piwi domain;N-terminal domain of argonaute;Argonaute linker 2 domain;PAZ domain;Argonaute linker 1 domain;Mid domain of argonaute
TRINITY_DN23942_c0_g2	-3.26505	2.79221e-07	4.89368e-06	down	3.08342	0.000168409	0.00104416	up		6.91	------	------	------	------	------	------	------	------	------	------	------	------	------
TRINITY_DN23952_c2_g1	4.61605	1.07087e-08	2.85696e-07	up	7.54561	1.12051e-08	2.25823e-07	up		0.48	------	------	------	------	------	------	------	------	------	------	------	------	------
TRINITY_DN23985_c0_g3	5.08654	7.6863e-07	1.18842e-05	up	7.79639	2.86811e-05	0.00022754	up		0.11	------	------	------	------	------	------	------	------	------	------	------	------	------
TRINITY_DN23985_c0_g5	3.81902	2.01689e-16	2.76002e-14	up	6.16786	3.03063e-22	7.44133e-20	up		13.04	------	------	------	------	------	------	------	------	------	------	------	------	------
TRINITY_DN23991_c0_g1	2.09356	9.80122e-07	1.46121e-05	up	1.83457	0.000225275	0.00134494	up	hypothetical protein D910_03479 [Dendroctonus ponderosae]	5.1	GO:0002940;GO:0005634;GO:0000049;GO:0004809;GO:0008168	BP:tRNA N2-guanine methylation;CC:nucleus;MF:tRNA binding;MF:tRN;MF:methyltransferase activity;	K00555	TRMT1, trm1	------	------	COG1867	J:Translation, ribosomal structure and biogenesis	sp|Q9VK89|TRM1_DROME;	Probable tRNA;	PF02005;PF05958;PF02475	TRM;tRNA_U5-meth_tr;Met_10	N2,N2-dimethylguanosine tRNA methyltransferase;tRNA;Met-10+ like-protein
TRINITY_DN23991_c0_g2	3.51891	9.16911e-05	0.000707449	up	4.51175	0.00218234	0.00918618	up		0.23	------	------	------	------	------	------	------	------	------	------	------	------	------
TRINITY_DN24000_c0_g4	6.33859	2.00687e-09	6.4714e-08	up	7.63172	7.2789e-09	1.52773e-07	up		0	------	------	------	------	------	------	------	------	------	------	------	------	------
TRINITY_DN24012_c1_g1	7.08285	2.11397e-05	0.000204959	up	5.8016	0.000370053	0.00205649	up		0	------	------	------	------	------	------	------	------	------	------	------	------	------
TRINITY_DN24018_c1_g1	2.56679	7.73009e-08	1.60957e-06	up	2.29381	6.69274e-07	8.41274e-06	up	hypothetical protein D910_06824 [Dendroctonus ponderosae]	1.01	GO:0003676	MF:nucleic acid binding;	------	------	------	------	------	------	------	------	PF16278	zf-C2HE	C2HE / C2H2 / C2HC zinc-binding finger
TRINITY_DN24037_c2_g1	1.14929	0.00146405	0.00711112	up	1.26021	1.45925e-08	2.83443e-07	up	PREDICTED: charged multivesicular body protein 4b-like [Dendroctonus ponderosae] >XP_019770649.1 PREDICTED: charged multivesicular body protein 4b-like [Dendroctonus ponderosae] >XP_019771055.1 PREDICTED: charged multivesicular body protein 4b-like [Dendroctonus ponderosae] >AEE63025.1 unknown [Dendroctonus ponderosae] >ENN70777.1 hypothetical protein YQE_12442, partial [Dendroctonus ponderosae] …	10.77	GO:0007034;GO:0008796	BP:vacuolar transport;MF:bi;	K12194	CHMP4, SNF7, VPS32	map04144	Endocytosis	ENOG410YE9I	U:Intracellular trafficking, secretion, and vesicular transport	sp|Q6GL11|CHM4B_XENTR;	Charged multivesicular body protein 4b OS=Xenopus tropicalis OX=8364 GN=chmp4b PE=2 SV=1;	PF03357	Snf7	Snf7
TRINITY_DN24049_c0_g4	-1.70314	0.000551188	0.0031903	down	2.05123	0.000449732	0.00243619	up	PREDICTED: 6-phosphofructo-2-kinase/fructose-2,6-bisphosphatase-like [Dendroctonus ponderosae]	173.01	GO:0006000;GO:0006003;GO:0005829;GO:0016301;GO:0004331;GO:0003873;GO:0005524	BP:fructose metabolic process;BP:fructose 2,6-bisphosphate metabolic process;CC:cytosol;MF:kinase activity;MF:fructose-2,6-bisphosphate 2-phosphatase activity;MF:6-phosphofructo-2-kinase activity;MF:ATP binding;	K01103	PFKFB3	map00051;map04066;map04152	Fructose and mannose metabolism;HIF-1 signaling pathway;AMPK signaling pathway	COG0406	G:Carbohydrate transport and metabolism	sp|Q91348|F26L_CHICK;	6-phosphofructo-2-kinase/fructose-2,6-bisphosphatase OS=Gallus gallus OX=9031 PE=2 SV=2;	PF01591;PF00300;PF13671;PF08433	6PF2K;His_Phos_1;AAA_33;KTI12	6-phosphofructo-2-kinase;Histidine phosphatase superfamily;AAA domain;Chromatin associated protein KTI12
TRINITY_DN24057_c1_g2	-7.55118	2.26027e-31	2.14383e-28	down	-2.76911	0.000794139	0.00393061	down	PREDICTED: cytochrome P450 4c3-like isoform X1 [Dendroctonus ponderosae]	35.37	GO:0005506;GO:0016705;GO:0004497;GO:0020037	MF:iron ion binding;MF:oxidoreductase activity, acting on paired donors, with incorporation or reduction of molecular oxygen;MF:monooxygenase activity;MF:heme binding;	K15001	CYP4	------	------	COG2124	Q:Secondary metabolites biosynthesis, transport and catabolism	sp|Q9VA27|CP4C3_DROME;	Cytochrome P450 4c3 OS=Drosophila melanogaster OX=7227 GN=Cyp4c3 PE=2 SV=1;	PF00067	p450	Cytochrome P450
TRINITY_DN24065_c1_g1	1.61502	1.23216e-05	0.000129705	up	-1.40407	0.00160934	0.00710546	down	hypothetical protein D910_00839 [Dendroctonus ponderosae]	9.58	GO:0005737;GO:0005634;GO:0005667;GO:0003700;GO:0003677;GO:0046983	CC:cytoplasm;CC:nucleus;CC:transcription factor complex;MF:transcription factor activity, sequence-specific DNA binding;MF:DNA binding;MF:protein dimerization activity;	------	------	------	------	ENOG410XRSX	S:Function unknown	sp|Q9VNG1|GGNB2_DROME;	Gametogenetin-binding protein 2-like OS=Drosophila melanogaster OX=7227 GN=CG2182 PE=2 SV=3;	------	------	------
TRINITY_DN24091_c3_g1	4.23844	3.10978e-05	0.00028541	up	6.1227	7.79094e-06	7.38944e-05	up		0.53	------	------	------	------	------	------	------	------	------	------	------	------	------
TRINITY_DN24098_c0_g1	-3.61234	6.29619e-09	1.76717e-07	down	-5.67319	1.82848e-13	9.66657e-12	down	hypothetical protein D910_10544 [Dendroctonus ponderosae]	13.25	GO:0030245;GO:0008810	BP:cellulose catabolic process;MF:cellulase activity;	------	------	------	------	ENOG410XPC9	G:Carbohydrate transport and metabolism	sp|P50899|GUXB_CELFA;	Exoglucanase B OS=Cellulomonas fimi;	PF02011	Glyco_hydro_48	Glycosyl hydrolase family 48
TRINITY_DN24102_c0_g1	2.94276	4.44764e-06	5.3988e-05	up	6.27068	5.19559e-08	8.71779e-07	up	PREDICTED: uncharacterized protein LOC109546881 [Dendroctonus ponderosae]	2.07	------	------	------	------	------	------	------	------	------	------	------	------	------
TRINITY_DN24105_c0_g1	2.05102	9.76256e-07	1.45781e-05	up	4.09497	6.81578e-06	6.54623e-05	up	hypothetical protein YQE_01744, partial [Dendroctonus ponderosae]	15.8	------	------	------	------	------	------	ENOG4111F8J	S:Function unknown	------	------	------	------	------
TRINITY_DN24108_c0_g4	-1.68844	4.54266e-05	0.000391571	down	2.43133	1.02527e-13	5.6495e-12	up	hypothetical protein D910_12742 [Dendroctonus ponderosae]	28.64	GO:0006506;GO:0016021;GO:0000225	BP:GPI anchor biosynthetic process;CC:integral component of membrane;MF:N-acetylglucosaminylphosphatidylinositol deacetylase activity;	K03434	PIGL	map00563	Glycosylphosphatidylinosito	COG2120;ENOG410YJ3E	S:Function unknown;O:Posttranslational modification, protein turnover, chaperones	sp|Q9XYQ2|UN119_DROME;	Protein unc-119 homolog OS=Drosophila melanogaster OX=7227 GN=unc-119 PE=2 SV=1;	PF02585	PIG-L	GlcNAc-PI de-N-acetylase
TRINITY_DN24114_c0_g4	-2.06222	8.32003e-06	9.25397e-05	down	-2.46663	0.000319019	0.00181264	down	unknown [Dendroctonus ponderosae]	36.54	GO:0005829;GO:0004032;GO:0008106;GO:0016491	CC:cytosol;MF:aldito;MF:alcohol dehydrogenas;MF:oxidoreductase activity;	K00011	AKR1B	map00051;map00040;map00561;map00790;map00052	Fructose and mannose metabolism;Pentose and glucuronate interconversions;Glycerolipid metabolism;Folate biosynthesis;Galactose metabolism	COG0656	S:Function unknown	sp|P45376|ALDR_MOUSE;	Aldo-keto reductase family 1 member B1 OS=Mus musculus OX=10090 GN=Akr1b1 PE=1 SV=3;	PF00248	Aldo_ket_red	Aldo/keto reductase family
TRINITY_DN24137_c0_g4	1.49112	0.00128262	0.00639359	up	3.87738	9.66989e-05	0.000646041	up	unknown [Dendroctonus ponderosae]	29.25	------	------	K01053	E3.1.1.17, gnl, RGN	map00030;map00053	Pentose phosphate pathway;Ascorbate and aldarate metabolism	COG3386	G:Carbohydrate transport and metabolism	sp|Q9I923|RGN_CHICK;	Regucalcin OS=Gallus gallus OX=9031 GN=RGN PE=2 SV=1;	PF08450	SGL	SMP-30/Gluconolactonase/LRE-like region
TRINITY_DN24163_c0_g1	1.3511	8.1877e-05	0.000643643	up	-1.39766	0.000227382	0.00135663	down	PREDICTED: 40S ribosomal protein S23 [Dendroctonus ponderosae] >CAH04343.1 S23e ribosomal protein [Biphyllus lunatus] >AEE61593.1 unknown [Dendroctonus ponderosae] >ENN71689.1 hypothetical protein YQE_11612, partial [Dendroctonus ponderosae] >ERL87232.1 hypothetical protein D910_04630 [Dendroctonus ponderosae]	114.86	GO:0006412;GO:0005840;GO:0022627;GO:0015935;GO:0003735	BP:translation;CC:ribosome;CC:cytosolic small ribosomal subunit;CC:small ribosomal subunit;MF:structural constituent of ribosome;	K02973	RP-S23e, RPS23	map03010	Ribosome	COG0048	S:Function unknown	sp|Q6EV23|RS23_PAPDA;	40S ribosomal protein S23 OS=Papilio dardanus OX=77259 GN=RpS23 PE=2 SV=1;	PF00164	Ribosom_S12_S23	Ribosomal protein S12/S23
TRINITY_DN24163_c1_g2	-2.52119	3.45874e-12	2.02849e-10	down	-2.24695	1.83491e-07	2.69677e-06	down	fizzy-related protein homolog [Anoplophora glabripennis]	42.21	GO:1904668;GO:0010997;GO:0097027	BP:positive regulation of ubiquitin protein ligase activity;MF:anaphase-promoting complex binding;MF:ubiquitin-protein transferase activator activity;	K03364	CDH1	map04110;map04120;map04914	Cell cycle;Ubiquitin mediated proteolysis;Progesterone-mediated oocyte maturation	ENOG410XQ8I	D:Cell cycle control, cell division, chromosome partitioning	sp|Q9R1K5|FZR1_MOUSE;	Fizzy-related protein homolog OS=Mus musculus OX=10090 GN=Fzr1 PE=1 SV=1;	PF00400;PF12894	WD40;ANAPC4_WD40	WD domain, G-beta repeat;Anaphase-promoting complex subunit 4 WD40 domain
TRINITY_DN24185_c0_g1	3.58471	3.01808e-07	5.23792e-06	up	7.16584	5.71204e-08	9.46248e-07	up	hypothetical protein YQE_09042, partial [Dendroctonus ponderosae]	0.74	GO:0006886;GO:0005634;GO:0005623;GO:0008536	BP:intracellular protein transport;CC:nucleus;CC:cell;MF:Ran GTPase binding;	------	------	------	------	------	------	------	------	------	------	------
TRINITY_DN24185_c0_g2	-1.43675	0.000159633	0.00113254	down	-2.15349	8.48693e-26	3.29347e-23	down	hypothetical protein D910_04822 [Dendroctonus ponderosae]	22.76	GO:0006606;GO:0006886;GO:0005829;GO:0005635;GO:0005623;GO:0005634;GO:0008536	BP:protein import into nucleus;BP:intracellular protein transport;CC:cytosol;CC:nuclear envelope;CC:cell;CC:nucleus;MF:Ran GTPase binding;	------	------	------	------	COG5657	A:RNA processing and modification	sp|Q9UI26|IPO11_HUMAN;	Importin-11 OS=Homo sapiens OX=9606 GN=IPO11 PE=1 SV=1;	PF03810	IBN_N	Importin-beta N-terminal domain
TRINITY_DN24194_c0_g1	2.57187	0.000467613	0.00278462	up	6.64231	5.34559e-07	6.95422e-06	up	hypothetical protein YQE_03040, partial [Dendroctonus ponderosae]	8.52	GO:0016021;GO:0003824;GO:0030170;GO:0030151	CC:integral component of membrane;MF:catalytic activity;MF:pyridoxal phosphate binding;MF:molybdenum ion binding;	------	------	------	------	COG3217	S:Function unknown	sp|Q1LZH1|MARC2_BOVIN;	Mitochondrial amidoxime reducing component 2 OS=Bos taurus OX=9913 GN=MARC2 PE=2 SV=1;	PF03473	MOSC	MOSC domain
TRINITY_DN24201_c0_g1	1.99324	4.96392e-08	1.08731e-06	up	1.64938	0.00146424	0.00657629	up	hypothetical protein D910_11012 [Dendroctonus ponderosae]	21.62	------	------	------	------	------	------	ENOG410ZUMD	S:Function unknown	sp|Q96FK6|WDR89_HUMAN;	WD repeat-containing protein 89 OS=Homo sapiens OX=9606 GN=WDR89 PE=2 SV=1;	PF00400	WD40	WD domain, G-beta repeat
TRINITY_DN24216_c0_g1	1.44421	5.63886e-05	0.000469012	up	-1.64188	7.84224e-06	7.43037e-05	down	PREDICTED: hepatocyte growth factor-regulated tyrosine kinase substrate [Dendroctonus ponderosae]	12.48	GO:0006886;GO:0005623;GO:0005938;GO:0048471;GO:0016301;GO:0046872	BP:intracellular protein transport;CC:cell;CC:cell cortex;CC:perinuclear region of cytoplasm;MF:kinase activity;MF:metal ion binding;	K12182	HGS, HRS, VPS27	map04145;map04144	Phagosome;Endocytosis	ENOG410XNRF	S:Function unknown	sp|Q960X8|HRS_DROME;	Hepatocyte growth factor-regulated tyrosine kinase substrate OS=Drosophila melanogaster OX=7227 GN=Hrs PE=1 SV=1;	PF12210;PF00790;PF01363	Hrs_helical;VHS;FYVE	Hepatocyte growth factor-regulated tyrosine kinase substrate;VHS domain;FYVE zinc finger
TRINITY_DN24219_c0_g1	-4.83556	9.96113e-14	8.13029e-12	down	-2.98794	0.000854111	0.00417197	down	hypothetical protein D910_02882 [Dendroctonus ponderosae]	73.82	GO:0006629;GO:0010025;GO:0035336;GO:0016021;GO:0005777;GO:0080019;GO:0102965	BP:lipid metabolic process;BP:wax biosynthetic process;BP:long-chain fatty-acyl-CoA metabolic process;CC:integral component of membrane;CC:peroxisome;MF:fatty-acyl-CoA reductas;MF:alcohol-forming fatty acyl-CoA reductase activity;	K13356	FAR	map04146;map04212	Peroxisome;Longevity regulating pathway - worm	ENOG410XS7R	S:Function unknown	sp|Q960W6|FACR3_DROME;	Putative fatty acyl-CoA reductase CG8306 OS=Drosophila melanogaster OX=7227 GN=CG8306 PE=2 SV=1;	PF07993	NAD_binding_4	Male sterility protein
TRINITY_DN24228_c3_g7	-3.23563	2.46356e-06	3.22526e-05	down	-7.24105	1.63073e-22	4.37396e-20	down	hypothetical protein YQE_08932, partial [Dendroctonus ponderosae]	16.03	------	------	------	------	------	------	ENOG410ZIVR	S:Function unknown	------	------	------	------	------
TRINITY_DN24229_c1_g1	1.58014	3.67865e-05	0.00032799	up	-1.32319	0.00152822	0.0068083	down	PREDICTED: uncharacterized protein LOC109543394 isoform X2 [Dendroctonus ponderosae]	4.16	------	------	------	------	------	------	ENOG410Y17S	S:Function unknown	------	------	------	------	------
TRINITY_DN24239_c0_g1	-2.68786	1.61303e-06	2.24081e-05	down	-2.97074	0.000767112	0.00382173	down	PREDICTED: fatty acyl-CoA reductase 1-like [Dendroctonus ponderosae]	9	GO:0006629;GO:0010025;GO:0035336;GO:0016021;GO:0005777;GO:0080019;GO:0102965	BP:lipid metabolic process;BP:wax biosynthetic process;BP:long-chain fatty-acyl-CoA metabolic process;CC:integral component of membrane;CC:peroxisome;MF:fatty-acyl-CoA reductas;MF:alcohol-forming fatty acyl-CoA reductase activity;	K13356	FAR	map04146;map04212	Peroxisome;Longevity regulating pathway - worm	ENOG410XS7R	S:Function unknown	sp|Q7ZXF5|FACR1_XENLA;	Fatty acyl-CoA reductase 1 OS=Xenopus laevis OX=8355 GN=far1 PE=2 SV=1;	PF07993;PF01370;PF02719;PF01073;PF16363	NAD_binding_4;Epimerase;Polysacc_synt_2;3Beta_HSD;GDP_Man_Dehyd	Male sterility protein;NAD dependent epimerase/dehydratase family;Polysaccharide biosynthesis protein;3-beta hydroxysteroid dehydrogenase/isomerase family;GDP-mannose 4,6 dehydratase
TRINITY_DN24243_c2_g5	-1.68188	3.27033e-05	0.000297466	down	1.62689	1.38382e-07	2.08247e-06	up	PREDICTED: tyrosine-protein phosphatase non-receptor type 4-like isoform X1 [Dendroctonus ponderosae]	43.18	GO:0031032;GO:0005856;GO:0004725	BP:actomyosin structure organization;CC:cytoskeleton;MF:protein tyrosine phosphatase activity;	K18037	PTPN4, MEG	------	------	COG5599	T:Signal transduction mechanisms	sp|Q9WU22|PTN4_MOUSE;	Tyrosine-protein phosphatase non-receptor type 4 OS=Mus musculus OX=10090 GN=Ptpn4 PE=1 SV=2;	PF00102;PF08736;PF00595;PF00782;PF13350;PF17820	Y_phosphatase;FA;PDZ;DSPc;Y_phosphatase3;PDZ_6	Protein-tyrosine phosphatase;FERM adjacent;PDZ domain;Dual specificity phosphatase, catalytic domain;Tyrosine phosphatase family;PDZ domain
TRINITY_DN24245_c0_g1	1.80805	0.00114349	0.00581277	up	3.1858	1.02904e-05	9.41731e-05	up	PREDICTED: high mobility group protein 20A-like [Dendroctonus ponderosae] >ENN79253.1 hypothetical protein YQE_04289, partial [Dendroctonus ponderosae]	6.32	GO:0005634;GO:0003677	CC:nucleus;MF:DNA binding;	------	------	------	------	COG5648	B:Chromatin structure and dynamics	sp|Q9P0W2|HM20B_HUMAN;	SWI/SNF-related matrix-associated actin-dependent regulator of chromatin subfamily E member 1-related OS=Homo sapiens OX=9606 GN=HMG20B PE=1 SV=1;	PF00505;PF09011;PF15742	HMG_box;HMG_box_2;DUF4686	HMG;HMG-box domain;Domain of unknown function
TRINITY_DN24254_c1_g1	-2.00808	0.000420251	0.00255006	down	4.85795	0.00167898	0.00735598	up		4.9	------	------	------	------	------	------	------	------	------	------	------	------	------
TRINITY_DN24260_c3_g4	-3.2394	1.43311e-07	2.76043e-06	down	-5.55132	6.73441e-06	6.48174e-05	down	PREDICTED: uncharacterized protein LOC109541229 [Dendroctonus ponderosae] >ENN74067.1 hypothetical protein YQE_09357, partial [Dendroctonus ponderosae] >ERL91189.1 hypothetical protein D910_08528 [Dendroctonus ponderosae]	30.4	------	------	------	------	------	------	------	------	------	------	PF06585	JHBP	Haemolymph juvenile hormone binding protein
TRINITY_DN24265_c0_g1	-3.08517	1.02314e-14	9.97956e-13	down	-2.1	0.000535021	0.00281623	down	unknown [Dendroctonus ponderosae]	808.59	GO:0006122;GO:0042776;GO:0016021;GO:0005750;GO:0020037;GO:0046872;GO:0045153;GO:0009055	BP:mitochondrial electron transport, ubiquinol to cytochrome c;BP:mitochondrial ATP synthesis coupled proton transport;CC:integral component of membrane;CC:mitochondrial respiratory chain complex III;MF:heme binding;MF:metal ion binding;MF:electron transporter, transferring electrons within CoQH2-cytochrome c reductase complex activity;MF:electron carrier activity;	K00413	CYC1, CYT1, petC	map04932;map04260;map05012;map05010;map05016;map00190	Non-alcoholic fatty liver diseas;Cardiac muscle contraction;Parkinson's disease;Alzheimer's disease;Huntington's disease;Oxidative phosphorylation	COG2857	C:Energy production and conversion	sp|Q9D0M3|CY1_MOUSE;	Cytochrome c1, heme protein, mitochondrial OS=Mus musculus OX=10090 GN=Cyc1 PE=1 SV=1;	PF02167;PF13442	Cytochrom_C1;Cytochrome_CBB3	Cytochrome C1 family;Cytochrome C oxidase, cbb3-type, subunit III
TRINITY_DN24271_c0_g5	-5.31902	8.79797e-20	2.08618e-17	down	2.64003	0.000347899	0.00195181	up	PREDICTED: uncharacterized protein LOC109534014 isoform X2 [Dendroctonus ponderosae]	128.42	GO:0005783;GO:0030314;GO:0016021;GO:0005789;GO:0005886;GO:0015278	CC:endoplasmic reticulum;CC:junctional membrane complex;CC:integral component of membrane;CC:endoplasmic reticulum membrane;CC:plasma membrane;MF:calcium-release channel activity;	K19530	JPH	------	------	COG4642;ENOG4112A99	S:Function unknown;	------	------	------	------	------
TRINITY_DN24281_c0_g1	-3.02635	5.89526e-06	6.87681e-05	down	-8.12147	1.93263e-15	1.51284e-13	down	hypothetical protein D910_06016 [Dendroctonus ponderosae]	124.62	GO:0006030;GO:0005576;GO:0008061	BP:chitin metabolic process;CC:extracellular region;MF:chitin binding;	------	------	------	------	ENOG4112A9I;ENOG41126RR;ENOG41121EJ;ENOG4111EXD;ENOG4110RW7	S:Function unknown;	sp|O76217|PE1_ANOGA;	Peritrophin-1 OS=Anopheles gambiae OX=7165 GN=Aper1 PE=2 SV=2;	PF01607	CBM_14	Chitin binding Peritrophin-A domain
TRINITY_DN24300_c1_g1	2.0447	1.53985e-06	2.15497e-05	up	2.35177	0.00082092	0.00403361	up		30.13	------	------	------	------	------	------	------	------	------	------	------	------	------
TRINITY_DN24303_c2_g1	1.42741	0.00167518	0.007943	up	3.34348	2.11686e-12	9.34852e-11	up		19.3	------	------	------	------	------	------	------	------	------	------	------	------	------
TRINITY_DN24313_c0_g3	1.84639	0.00030238	0.00193103	up	1.63071	2.24943e-05	0.000183403	up	hypothetical protein YQE_03922, partial [Dendroctonus ponderosae]	42.09	GO:1902626;GO:0006412;GO:0000027;GO:0022625;GO:0003735;GO:0003723	BP:assembly of large subunit precursor of preribosome;BP:translation;BP:ribosomal large subunit assembly;CC:cytosolic large ribosomal subunit;MF:structural constituent of ribosome;MF:RNA binding;	K02896	RP-L24e, RPL24	map03010	Ribosome	COG2075	S:Function unknown	sp|Q9VGN9|RLP24_DROME;	Probable ribosome biogenesis protein RLP24 OS=Drosophila melanogaster OX=7227 GN=RpL24-like PE=1 SV=1;	PF01246	Ribosomal_L24e	Ribosomal protein L24e
TRINITY_DN24316_c0_g2	5.7901	5.29618e-07	8.52908e-06	up	7.36525	1.10296e-06	1.31569e-05	up		0	------	------	------	------	------	------	------	------	------	------	------	------	------
TRINITY_DN24349_c0_g2	-3.23419	4.72858e-11	2.17136e-09	down	-5.46652	6.67415e-16	5.76918e-14	down	unknown [Dendroctonus ponderosae]	44.49	GO:0005975;GO:0004553	BP:carbohydrate metabolic process;MF:hydrolase activity, hydrolyzing O-glycosyl compounds;	------	------	------	------	COG1501	G:Carbohydrate transport and metabolism	sp|Q69ZQ1|MYORG_MOUSE;	Myogenesis-regulating glycosidase OS=Mus musculus OX=10090 GN=Myorg PE=1 SV=2;	PF01055	Glyco_hydro_31	Glycosyl hydrolases family 31
TRINITY_DN24358_c0_g1	-2.82288	3.43089e-06	4.32278e-05	down	-4.17211	2.80467e-05	0.000223397	down	fasciclin-1-like isoform X1 [Diabrotica virgifera virgifera]	6.72	GO:0007155;GO:0030198;GO:0031012;GO:0005615;GO:0050839	BP:cell adhesion;BP:extracellular matrix organization;CC:extracellular matrix;CC:extracellular space;MF:cell adhesion molecule binding;	K19897	FAS1	------	------	COG2335	S:Function unknown	sp|P10675|FAS1_SCHAM;	Fasciclin-1 OS=Schistocerca americana OX=7009 GN=FAS1 PE=1 SV=1;	PF02469	Fasciclin	Fasciclin domain
TRINITY_DN24367_c0_g3	-1.94056	0.000111966	0.000839852	down	-1.47519	0.000938633	0.00450974	down	hypothetical protein D910_00782 [Dendroctonus ponderosae] >ERL84055.1 hypothetical protein D910_01388 [Dendroctonus ponderosae] >ERL84057.1 hypothetical protein D910_01390 [Dendroctonus ponderosae]	754.61	GO:0015986;GO:0045261;GO:0000275;GO:0046933	BP:ATP synthesis coupled proton transport;CC:proton-transporting ATP synthase complex, catalytic core;CC:mitochondrial proton-transporting ATP synthase complex, catalytic core;MF:proton-transporting ATP synthase activity, rotational mechanism;	K02134	ATPeF1D, ATP5D, ATP16	map05012;map00190;map05010;map05016	Parkinson's disease;Oxidative phosphorylation;Alzheimer's disease;Huntington's disease	COG0355	C:Energy production and conversion	sp|P35434|ATPD_RAT;	ATP synthase subunit delta, mitochondrial OS=Rattus norvegicus OX=10116 GN=Atp5f1d PE=1 SV=2;	PF02823	ATP-synt_DE_N	ATP synthase, Delta/Epsilon chain, beta-sandwich domain
TRINITY_DN24367_c0_g4	1.7709	0.000101538	0.00077473	up	6.48911	5.88681e-25	2.0648e-22	up		5.69	------	------	------	------	------	------	------	------	------	------	------	------	------
TRINITY_DN24372_c2_g2	3.06411	2.30011e-05	0.000219372	up	4.98945	0.000361266	0.00201564	up		1.12	------	------	------	------	------	------	------	------	------	------	------	------	------
TRINITY_DN24379_c0_g1	-2.86284	1.61072e-10	6.63239e-09	down	-2.06463	2.18088e-05	0.000178533	down	PREDICTED: cytochrome c oxidase subunit 7C, mitochondrial-like [Dendroctonus ponderosae] >XP_019767594.1 PREDICTED: cytochrome c oxidase subunit 7C, mitochondrial-like [Dendroctonus ponderosae]	303.91	GO:0006123;GO:0016021;GO:0005739;GO:0004129	BP:mitochondrial electron transport, cytochrome c to oxygen;CC:integral component of membrane;CC:mitochondrion;MF:cytochrome-c oxidase activity;	K02272	COX7C	map04932;map04260;map05012;map05010;map05016;map00190	Non-alcoholic fatty liver diseas;Cardiac muscle contraction;Parkinson's disease;Alzheimer's disease;Huntington's disease;Oxidative phosphorylation	ENOG4112B97;COG5048	O:Posttranslational modification, protein turnover, chaperones;	sp|P00430|COX7C_BOVIN;	Cytochrome c oxidase subunit 7C, mitochondrial OS=Bos taurus OX=9913 GN=COX7C PE=1 SV=3;	PF02935	COX7C	Cytochrome c oxidase subunit VIIc
TRINITY_DN24384_c6_g2	-6.97197	1.73954e-09	5.69012e-08	down	-6.50449	2.62685e-06	2.82328e-05	down	PREDICTED: putative epidermal cell surface receptor [Dendroctonus ponderosae]	1.01	------	------	------	------	------	------	------	------	------	------	------	------	------
TRINITY_DN24389_c0_g2	2.03061	0.000459341	0.00274248	up	6.34383	3.39615e-05	0.000262468	up		1.46	------	------	------	------	------	------	------	------	------	------	------	------	------
TRINITY_DN24391_c0_g3	4.38237	0.000162325	0.00114864	up	7.86307	6.57125e-05	0.00046563	up		0.15	------	------	------	------	------	------	------	------	------	------	------	------	------
TRINITY_DN24399_c0_g1	-2.03904	3.98021e-06	4.90941e-05	down	-2.74312	8.01014e-07	9.87141e-06	down	PREDICTED: ribosomal protein S6 kinase beta-2 [Dendroctonus ponderosae]	30.43	GO:0007165;GO:0004674;GO:0005524	BP:signal transduction;MF:protein serine/threonine kinase activity;MF:ATP binding;	K04688	RPS6KB	map05210;map05212;map04350;map04012;map04213;map04212;map04211;map05224;map05221;map04140;map04666;map05205;map05200;map01522;map04066;map01521;map04910;map05231;map04150;map04151;map04152;map04931	Colorectal cancer;Pancreatic cancer;TGF-beta signaling pathway;ErbB signaling pathway;Longevity regulating pathway - multiple species;Longevity regulating pathway - worm;Longevity regulating pathway;Breast cancer;Acute myeloid leukemia;Autophagy - animal;Fc gamma R-mediated phagocytosis;Proteoglycans in cancer;Pathways in cancer;Endocrine resistance;HIF-1 signaling pathway;EGFR tyrosine kinase in…	ENOG410XNPH	T:Signal transduction mechanisms	sp|Q6TJY3|KS6B1_BOVIN;	Ribosomal protein S6 kinase beta-1 OS=Bos taurus OX=9913 GN=RPS6KB1 PE=2 SV=1;	PF00069;PF07714;PF00433;PF14531;PF12330;PF17667	Pkinase;Pkinase_Tyr;Pkinase_C;Kinase-like;Haspin_kinase;Pkinase_fungal	Protein kinase domain;Protein tyrosine kinase;Protein kinase C terminal domain;Kinase-like;Haspin like kinase domain;Fungal protein kinase
TRINITY_DN24403_c0_g1	4.50998	0.000356252	0.00221198	up	4.74419	0.0023914	0.00987697	up		0.08	------	------	------	------	------	------	------	------	------	------	------	------	------
TRINITY_DN24405_c0_g3	-1.39705	0.00175079	0.00825174	down	-2.12189	8.33462e-07	1.02161e-05	down	PREDICTED: mitochondrial-processing peptidase subunit beta [Dendroctonus ponderosae] >ENN72490.1 hypothetical protein YQE_10831, partial [Dendroctonus ponderosae]	252.87	GO:0006627;GO:0005739;GO:0005743;GO:0017087;GO:0004222;GO:0046872	BP:protein processing involved in protein targeting to mitochondrion;CC:mitochondrion;CC:mitochondrial inner membrane;CC:mitochondrial processing peptidase complex;MF:metalloendopeptidase activity;MF:metal ion binding;	K17732	PMPCB, MAS1	------	------	COG0612	S:Function unknown	sp|Q3SZ71|MPPB_BOVIN;	Mitochondrial-processing peptidase subunit beta OS=Bos taurus OX=9913 GN=PMPCB PE=2 SV=1;	PF00675;PF05193	Peptidase_M16;Peptidase_M16_C	Insulinase;Peptidase M16 inactive domain
TRINITY_DN24409_c0_g2	3.66232	0.000635235	0.00358563	up	4.73885	0.00048705	0.00259898	up	PREDICTED: heparan-alpha-glucosaminide N-acetyltransferase [Dendroctonus ponderosae]	0.1	------	------	------	------	------	------	------	------	------	------	------	------	------
TRINITY_DN24452_c2_g2	3.95385	1.66715e-05	0.000167604	up	3.91494	0.00152514	0.00680123	up		1.38	------	------	------	------	------	------	------	------	------	------	------	------	------
TRINITY_DN24457_c0_g2	1.41713	0.000683738	0.00380937	up	-1.51036	3.80821e-06	3.89556e-05	down	hypothetical protein YQE_09007, partial [Dendroctonus ponderosae]	8.98	GO:0007015;GO:2000601;GO:0000147;GO:0030048;GO:0051666;GO:0006897;GO:0030479;GO:0005884;GO:0051015;GO:0003779	BP:actin filament organization;BP:positive regulation of Arp2/3 complex-mediated actin nucleation;BP:actin cortical patch assembly;BP:actin filament-based movement;BP:actin cortical patch localization;BP:endocytosis;CC:actin cortical patch;CC:actin filament;MF:actin filament binding;MF:actin binding;	K05747	WAS	map04666;map04144;map04530;map04810;map05131;map05130;map05132;map04062;map05231;map05100;map04520	Fc gamma R-mediated phagocytosis;Endocytosis;Tight junction;Regulation of actin cytoskeleton;Shigellosis;Pathogenic Escherichia coli infection;Salmonella infection;Chemokine signaling pathway;Choline metabolism in cancer;Bacterial invasion of epithelial cells;Adherens junction	ENOG4111H4S;ENOG4111J0D	S:Function unknown;	sp|Q91YD9|WASL_MOUSE;	Neural Wiskott-Aldrich syndrome protein OS=Mus musculus OX=10090 GN=Wasl PE=1 SV=1;	PF00568;PF00786;PF02205	WH1;PBD;WH2	WH1 domain;P21-Rho-binding domain;WH2 motif
TRINITY_DN24469_c0_g2	2.06595	0.000476443	0.00282863	up	-2.28064	5.84483e-10	1.5057e-08	down	PREDICTED: organic cation transporter protein isoform X2 [Dendroctonus ponderosae] >ENN72140.1 hypothetical protein YQE_11198, partial [Dendroctonus ponderosae] >ERL91114.1 hypothetical protein D910_08455 [Dendroctonus ponderosae]	24.89	GO:0016021;GO:0022857	CC:integral component of membrane;MF:transmembrane transporter activity;	------	------	------	------	ENOG410YUFN;COG0477	G:Carbohydrate transport and metabolism;	sp|Q9VCA2|ORCT_DROME;	Organic cation transporter protein OS=Drosophila melanogaster OX=7227 GN=Orct PE=1 SV=1;	PF00083;PF07690	Sugar_tr;MFS_1	Sugar;Major Facilitator Superfamily
TRINITY_DN24479_c1_g5	2.17331	0.00158203	0.00758239	up	3.89466	7.74159e-05	0.000532826	up	PREDICTED: scavenger receptor class B member 1-like isoform X1 [Dendroctonus ponderosae] >XP_019768071.1 PREDICTED: scavenger receptor class B member 1-like isoform X1 [Dendroctonus ponderosae] >ENN72458.1 hypothetical protein YQE_10800, partial [Dendroctonus ponderosae]	2.47	GO:0016021	CC:integral component of membrane;	------	------	------	------	------	------	------	------	------	------	------
TRINITY_DN24485_c1_g1	4.25823	0.000543715	0.00315516	up	5.25706	0.000735285	0.00367723	up	PREDICTED: anion exchange protein 3 isoform X6 [Dendroctonus ponderosae]	0.08	GO:0016020;GO:0005452	CC:membrane;MF:inorganic anion exchanger activity;	K13855	SLC4A2, AE2	map04972;map04970;map04971;map04976	Pancreatic secretion;Salivary secretion;Gastric acid secretion;Bile secretion	ENOG410XPHD	U:Intracellular trafficking, secretion, and vesicular transport	------	------	------	------	------
TRINITY_DN24489_c1_g1	-4.92577	1.04817e-08	2.80731e-07	down	-3.16427	0.00227414	0.00948503	down	hypothetical protein D910_02882 [Dendroctonus ponderosae]	6.1	GO:0006629;GO:0010025;GO:0035336;GO:0016021;GO:0005777;GO:0080019;GO:0102965	BP:lipid metabolic process;BP:wax biosynthetic process;BP:long-chain fatty-acyl-CoA metabolic process;CC:integral component of membrane;CC:peroxisome;MF:fatty-acyl-CoA reductas;MF:alcohol-forming fatty acyl-CoA reductase activity;	K13356	FAR	map04146;map04212	Peroxisome;Longevity regulating pathway - worm	ENOG410XS7R	S:Function unknown	sp|Q960W6|FACR3_DROME;	Putative fatty acyl-CoA reductase CG8306 OS=Drosophila melanogaster OX=7227 GN=CG8306 PE=2 SV=1;	PF07993	NAD_binding_4	Male sterility protein
TRINITY_DN24491_c0_g1	3.17482	7.74273e-10	2.80226e-08	up	3.0017	4.1177e-08	7.04528e-07	up	PREDICTED: signal recognition particle 14 kDa protein [Dendroctonus ponderosae] >ENN70695.1 hypothetical protein YQE_12640, partial [Dendroctonus ponderosae] >ERL93728.1 hypothetical protein D910_11014 [Dendroctonus ponderosae]	0.73	GO:0006614;GO:0045047;GO:0005786;GO:0030942;GO:0008312	BP:SRP-dependent cotranslational protein targeting to membrane;BP:protein targeting to ER;CC:signal recognition particle, endoplasmic reticulum targeting;MF:endoplasmic reticulum signal peptide binding;MF:7S RNA binding;	K03104	SRP14	map03060	Protein export	ENOG4111PSF	U:Intracellular trafficking, secretion, and vesicular transport	sp|A6QQL9|SRP14_BOVIN;	Signal recognition particle 14 kDa protein OS=Bos taurus OX=9913 GN=SRP14 PE=3 SV=1;	PF02290	SRP14	Signal recognition particle 14kD protein
TRINITY_DN24501_c0_g2	-2.12919	3.58369e-06	4.48467e-05	down	2.92023	3.56019e-05	0.000273231	up	PREDICTED: lysophosphatidylcholine acyltransferase isoform X1 [Dendroctonus ponderosae]	9.56	GO:0016021;GO:0016746;GO:0005509	CC:integral component of membrane;MF:transferase activity, transferring acyl groups;MF:calcium ion binding;	K13510	LPCAT1_2	map00565;map00564	Ether lipid metabolism;Glycerophospholipid metabolism	ENOG410XSIQ	I:Lipid transport and metabolism	sp|Q0KHU5|PCAT_DROME;	Lysophosphatidylcholine acyltransferase OS=Drosophila melanogaster OX=7227 GN=LPCAT PE=2 SV=1;	PF01553;PF13499;PF00036	Acyltransferase;EF-hand_7;EF-hand_1	Acyltransferase;EF-hand domain pair;EF hand
TRINITY_DN24504_c0_g2	-2.95839	2.8546e-07	4.98215e-06	down	-2.8076	3.56238e-05	0.000273231	down	hypothetical protein D910_01082, partial [Dendroctonus ponderosae]	8.97	GO:0005634;GO:0046872	CC:nucleus;MF:metal ion binding;	K17552	PPP1R10	------	------	ENOG410XP4M	T:Signal transduction mechanisms	sp|Q96QC0|PP1RA_HUMAN;	Serine/threonine-protein phosphatase 1 regulatory subunit 10 OS=Homo sapiens OX=9606 GN=PPP1R10 PE=1 SV=1;	------	------	------
TRINITY_DN24506_c1_g1	-2.56252	0.00081639	0.00441605	down	5.56775	0.00079338	0.00392792	up		0.65	------	------	------	------	------	------	------	------	------	------	------	------	------
TRINITY_DN24549_c0_g1	1.39629	0.000170523	0.00119714	up	-1.16576	0.000261929	0.00152663	down	hypothetical protein D910_03212 [Dendroctonus ponderosae]	9.09	GO:0000463;GO:0006364;GO:0000466;GO:0005730;GO:0030687;GO:0070545;GO:0005654;GO:0043021	BP:maturation of LSU-rRNA from tricistronic rRNA transcrip;BP:rRNA processing;BP:maturation of 5.8S rRNA from tricistronic rRNA transcrip;CC:nucleolus;CC:preribosome, large subunit precursor;CC:PeBoW complex;CC:nucleoplasm;MF:ribonucleoprotein complex binding;	K14863	YTM1, WDR12	------	------	ENOG410XPW5	J:Translation, ribosomal structure and biogenesis	sp|B3MJV8|WDR12_DROAN;	Ribosome biogenesis protein WDR12 homolog OS=Drosophila ananassae OX=7217 GN=GF14067 PE=3 SV=1;	PF00400;PF08154	WD40;NLE	WD domain, G-beta repeat;NLE
TRINITY_DN24549_c0_g2	-2.47783	8.63806e-06	9.56531e-05	down	-4.59671	1.82384e-10	5.33949e-09	down	hypothetical protein D910_03211 [Dendroctonus ponderosae]	6.91	GO:0016973;GO:0000055;GO:0000056;GO:0044614;GO:0017056	BP:pol;BP:ribosomal large subunit export from nucleus;BP:ribosomal small subunit export from nucleus;CC:nuclear pore cytoplasmic filaments;MF:structural constituent of nuclear pore;	K14317	NUP214, CAN	map03013	RNA transport	ENOG410YBVS;ENOG4111BAC;ENOG410ZU7R	U:Intracellular trafficking, secretion, and vesicular transport;S:Function unknown;S:Function unknown	sp|Q9W1X4|NU214_DROME;	Nuclear pore complex protein Nup214 OS=Drosophila melanogaster OX=7227 GN=Nup214 PE=1 SV=2;	------	------	------
TRINITY_DN24550_c1_g1	3.17698	2.96341e-07	5.15895e-06	up	2.89095	0.00150032	0.00671351	up		18.39	------	------	------	------	------	------	------	------	------	------	------	------	------
TRINITY_DN24554_c0_g3	-1.59412	0.000116092	0.000864901	down	-1.57119	7.52772e-05	0.000520463	down	PREDICTED: uncharacterized protein LOC109534839 [Dendroctonus ponderosae] >ENN79451.1 hypothetical protein YQE_04095, partial [Dendroctonus ponderosae] >ERL95652.1 hypothetical protein D910_00075 [Dendroctonus ponderosae]	136.51	GO:0032981;GO:0016021;GO:0005747	BP:mitochondrial respiratory chain complex I assembly;CC:integral component of membrane;CC:mitochondrial respiratory chain complex I;	K03956	NDUFA11	map00190;map05012;map05010;map04723;map05016;map04932	Oxidative phosphorylation;Parkinson's disease;Alzheimer's disease;Retrograde endocannabinoid signaling;Huntington's disease;Non-alcoholic fatty liver diseas	ENOG4112449	C:Energy production and conversion	------	------	------	------	------
TRINITY_DN24568_c0_g1	-2.23586	3.71938e-07	6.28411e-06	down	6.12348	1.18681e-13	6.50039e-12	up	PREDICTED: uncharacterized protein LOC109543133 isoform X1 [Dendroctonus ponderosae]	43.12	GO:0045454;GO:0005623	BP:cell redox homeostasis;CC:cell;	------	------	------	------	COG0526	K:Transcription	sp|Q5I0H9|PDIA5_RAT;	Protein disulfide-isomerase A5 OS=Rattus norvegicus OX=10116 GN=Pdia5 PE=2 SV=1;	PF00085;PF13098;PF13192;PF05768	Thioredoxin;Thioredoxin_2;Thioredoxin_3;DUF836	Thioredoxin;Thioredoxin-like domain;Thioredoxin domain;Glutaredoxin-like domain
TRINITY_DN24570_c0_g1	1.95139	0.000221242	0.00148598	up	-2.34149	1.02301e-09	2.5146e-08	down	PREDICTED: UDP-glucuronosyltransferase 1-7C-like [Dendroctonus ponderosae]	7.98	GO:0016021;GO:0016758;GO:0016740;GO:0015020;GO:0016757	CC:integral component of membrane;MF:transferase activity, transferring hexosyl groups;MF:transferase activity;MF:glucuronosyltransferase activity;MF:transferase activity, transferring glycosyl groups;	K00699	UGT	map05204;map00983;map00982;map00980;map00040;map00860;map00053;map00830;map00140	Chemical carcinogenesis;Drug metabolism - other enzymes;Drug metabolism - cytochrome P450;Metabolism of xenobiotics by cytochrome P450;Pentose and glucuronate interconversions;Porphyrin and chlorophyll metabolism;Ascorbate and aldarate metabolism;Retinol metabolism;Steroid hormone biosynthesis	COG1819	S:Function unknown	sp|Q6ZQM8|UD17C_MOUSE;	UDP-glucuronosyltransferase 1-7C OS=Mus musculus OX=10090 GN=Ugt1a7c PE=1 SV=1;	PF00201;PF04101;PF13528	UDPGT;Glyco_tran_28_C;Glyco_trans_1_3	UDP-glucoronosyl and UDP-glucosyl transferase;Glycosyltransferase family 28 C-terminal domain;Glycosyl transferase family 1
TRINITY_DN24583_c0_g1	-2.15585	0.000446104	0.0026815	down	4.12255	0.000293778	0.00168976	up	PREDICTED: protein FAM135A [Dendroctonus ponderosae]	17.09	GO:0044255	BP:cellular lipid metabolic process;	------	------	------	------	ENOG410XQFK	S:Function unknown	sp|Q5RA75|F135A_PONAB;	Protein FAM135A OS=Pongo abelii OX=9601 GN=FAM135A PE=2 SV=1;	PF05057;PF12394;PF07819	DUF676;DUF3657;PGAP1	Putative serine esterase;Protein FAM135;PGAP1-like protein
TRINITY_DN24586_c0_g4	-6.92474	1.49739e-06	2.10568e-05	down	-11.939	3.24425e-20	5.37926e-18	down	hypothetical protein D910_05096 [Dendroctonus ponderosae]	3.08	GO:0005975;GO:0016051;GO:0005773;GO:0004553;GO:0004565	BP:carbohydrate metabolic process;BP:carbohydrate biosynthetic process;CC:vacuole;MF:hydrolase activity, hydrolyzing O-glycosyl compounds;MF:beta-galactosidase activity;	------	------	------	------	COG1874	G:Carbohydrate transport and metabolism	sp|Q8IW92|GLBL2_HUMAN;	Beta-galactosidase-1-like protein 2 OS=Homo sapiens OX=9606 GN=GLB1L2 PE=2 SV=1;	PF01301;PF02449	Glyco_hydro_35;Glyco_hydro_42	Glycosyl hydrolases family 35;Beta-galactosidase
TRINITY_DN24598_c0_g1	1.88562	1.23846e-06	1.7929e-05	up	-1.38425	7.00843e-05	0.00048957	down	hypothetical protein D910_00703 [Dendroctonus ponderosae] >ERL85913.1 hypothetical protein D910_03328 [Dendroctonus ponderosae]	31.49	GO:0000463;GO:0000466;GO:0005730;GO:0030687;GO:0005654;GO:0043021	BP:maturation of LSU-rRNA from tricistronic rRNA transcrip;BP:maturation of 5.8S rRNA from tricistronic rRNA transcrip;CC:nucleolus;CC:preribosome, large subunit precursor;CC:nucleoplasm;MF:ribonucleoprotein complex binding;	K14843	PES1, NOP7	------	------	COG5163;COG1537	J:Translation, ribosomal structure and biogenesis;S:Function unknown	sp|P48612|PELO_DROME;	Protein pelota OS=Drosophila melanogaster OX=7227 GN=pelo PE=2 SV=2;	PF06732;PF16589	Pescadillo_N;BRCT_2	Pescadillo N-terminus;BRCT domain, a BRCA1 C-terminus domain
TRINITY_DN24607_c0_g2	-3.06122	2.91543e-05	0.00026928	down	-3.04737	2.63498e-05	0.000211436	down	hypothetical protein D910_12311 [Dendroctonus ponderosae]	19.09	GO:0016021	CC:integral component of membrane;	K13885	SCARB1	map05160;map04976;map04977;map04975;map04925;map04145;map04913	Hepatitis C;Bile secretion;Vitamin digestion and absorption;Fat digestion and absorption;Aldosterone synthesis and secretion;Phagosome;Ovarian steroidogenesis	ENOG410XS17	U:Intracellular trafficking, secretion, and vesicular transport	sp|B7Z031|PESTE_DROME;	Protein peste OS=Drosophila melanogaster OX=7227 GN=pes PE=2 SV=1;	PF01130	CD36	CD36 family
TRINITY_DN24618_c1_g2	-2.65972	0.000827994	0.00446652	down	6.82992	0.00127471	0.0058636	up	PREDICTED: pyrroline-5-carboxylate reductase-like [Dendroctonus ponderosae]	21.35	GO:0055129;GO:0006561;GO:0004735	BP:L-proline biosynthetic process;BP:proline biosynthetic process;MF:pyrroline-5-carboxylate reductase activity;	K00286	proC	map00330	Arginine and proline metabolism	COG0345	E:Amino acid transport and metabolism	sp|A1L2Q8|P5CR3_XENLA;	Pyrroline-5-carboxylate reductase 3 OS=Xenopus laevis OX=8355 GN=pycr3 PE=2 SV=2;	PF14748;PF03807;PF03446	P5CR_dimer;F420_oxidored;NAD_binding_2	Pyrroline-5-carboxylate reductase dimerisation;NADP oxidoreductase coenzyme F420-dependent;NAD binding domain of 6-phosphogluconate dehydrogenase
TRINITY_DN24630_c0_g1	-4.64339	1.45708e-27	9.32059e-25	down	-3.28701	0.000386772	0.00213445	down	PREDICTED: leucine-rich repeat-containing protein 40 [Dendroctonus ponderosae] >ENN72185.1 hypothetical protein YQE_11170, partial [Dendroctonus ponderosae] >ERL92188.1 hypothetical protein D910_09508 [Dendroctonus ponderosae]	123.62	------	------	------	------	------	------	ENOG4111NSQ	S:Function unknown	------	------	PF13855;PF12799;PF00560	LRR_8;LRR_4;LRR_1	Leucine rich repeat;Leucine Rich repeats;Leucine Rich Repeat
TRINITY_DN24641_c2_g1	1.72363	0.00192055	0.00890536	up	4.1861	4.79348e-06	4.7906e-05	up		26.97	------	------	------	------	------	------	------	------	------	------	------	------	------
TRINITY_DN24660_c0_g3	-2.62219	4.59096e-05	0.000395132	down	-3.32386	1.6567e-05	0.000141067	down	PREDICTED: epithelial discoidin domain-containing receptor 1-like [Dendroctonus ponderosae]	1.42	GO:0008284;GO:0030154;GO:0001952;GO:0007160;GO:1903053;GO:0007169;GO:0043235;GO:0016021;GO:0005887;GO:0038062;GO:0004714;GO:0004713;GO:0005518;GO:0005524	BP:positive regulation of cell proliferation;BP:cell differentiation;BP:regulation of cell-matrix adhesion;BP:cell-matrix adhesion;BP:regulation of extracellular matrix organization;BP:transmembrane receptor protein tyrosine kinase signaling pathway;CC:receptor complex;CC:integral component of membrane;CC:integral component of plasma membrane;MF:protein tyrosine kinase collagen receptor activity;…	------	------	------	------	ENOG410XQAI	T:Signal transduction mechanisms	sp|Q16832|DDR2_HUMAN;	Discoidin domain-containing receptor 2 OS=Homo sapiens OX=9606 GN=DDR2 PE=1 SV=2;	PF07714;PF00069;PF00754	Pkinase_Tyr;Pkinase;F5_F8_type_C	Protein tyrosine kinase;Protein kinase domain;F5/8 type C domain
TRINITY_DN24663_c1_g1	-2.91988	8.56176e-14	7.13636e-12	down	-4.38875	8.88571e-16	7.43424e-14	down	PREDICTED: dolichyl-diphosphooligosaccharide--protein glycosyltransferase subunit STT3B [Dendroctonus ponderosae]	91.46	GO:0006486;GO:0018279;GO:0043687;GO:0016021;GO:0008250;GO:0004576;GO:0004579	BP:protein glycosylation;BP:protein N-linked glycosylation via asparagine;BP:post-translational protein modification;CC:integral component of membrane;CC:oligosaccharyltransferase complex;MF:oligosaccharyl transferase activity;MF:dolichyl-diphosphooligosaccharide-protein glycotransferase activity;	K07151	STT3	map00510;map04141	N-Glycan biosynthesis;Protein processing in endoplasmic reticulum	COG1287	S:Function unknown	sp|Q3TDQ1|STT3B_MOUSE;	Dolichyl-diphosphooligosaccharide--protein glycosyltransferase subunit STT3B OS=Mus musculus OX=10090 GN=Stt3b PE=1 SV=2;	PF02516	STT3	Oligosaccharyl transferase STT3 subunit
TRINITY_DN24684_c0_g2	-4.30519	1.7485e-15	2.02929e-13	down	-3.72075	1.2544e-08	2.47877e-07	down	hypothetical protein YQE_03699, partial [Dendroctonus ponderosae] >ERL87545.1 hypothetical protein D910_04936 [Dendroctonus ponderosae]	36.39	GO:0006506;GO:0005789;GO:0005758;GO:0016021;GO:0016758	BP:GPI anchor biosynthetic process;CC:endoplasmic reticulum membrane;CC:mitochondrial intermembrane space;CC:integral component of membrane;MF:transferase activity, transferring hexosyl groups;	------	------	------	------	ENOG410XV6I	S:Function unknown	sp|P56277|CMC4_HUMAN;	Cx9C motif-containing protein 4 OS=Homo sapiens OX=9606 GN=CMC4 PE=1 SV=1;	PF08991	MTCP1	Mature-T-Cell Proliferation I type
TRINITY_DN24687_c0_g3	-2.21768	4.45844e-06	5.40714e-05	down	3.89583	0.000268171	0.00155644	up	PREDICTED: insulin-like growth factor-binding protein complex acid labile subunit [Dendroctonus ponderosae] >ENN81114.1 hypothetical protein YQE_02482, partial [Dendroctonus ponderosae] >ERL85228.1 hypothetical protein D910_02649 [Dendroctonus ponderosae]	2.13	GO:0016021	CC:integral component of membrane;	------	------	------	------	COG4886	S:Function unknown	------	------	PF13855;PF12799;PF13306;PF14580	LRR_8;LRR_4;LRR_5;LRR_9	Leucine rich repeat;Leucine Rich repeats;BspA type Leucine rich repeat region;Leucine-rich repeat
TRINITY_DN24688_c4_g2	-5.70964	1.03683e-11	5.52696e-10	down	5.84414	0.000806693	0.00397656	up		129.45	------	------	------	------	------	------	------	------	------	------	------	------	------
TRINITY_DN24691_c1_g4	2.47373	4.64338e-07	7.60797e-06	up	4.06533	1.18337e-06	1.3979e-05	up	PREDICTED: uncharacterized protein LOC109544640 [Dendroctonus ponderosae]	1.8	------	------	------	------	------	------	ENOG410Y6S7	S:Function unknown	------	------	------	------	------
TRINITY_DN24698_c0_g1	1.93076	9.39754e-08	1.92042e-06	up	-1.67274	0.000904072	0.00437732	down	hypothetical protein D910_03884 [Dendroctonus ponderosae]	8.97	------	------	------	------	------	------	ENOG4111K9D	S:Function unknown	------	------	------	------	------
TRINITY_DN24722_c0_g3	3.48806	2.64138e-06	3.42383e-05	up	4.39296	9.56785e-05	0.000640162	up	PREDICTED: uncharacterized protein LOC109533799 [Dendroctonus ponderosae] >XP_019754783.1 PREDICTED: uncharacterized protein LOC109533799 [Dendroctonus ponderosae]	0.7	------	------	------	------	------	------	------	------	------	------	------	------	------
TRINITY_DN24727_c0_g1	3.05961	6.78431e-05	0.00054869	up	4.82006	5.52881e-05	0.000399841	up	PREDICTED: guanylate cyclase 32E [Dendroctonus ponderosae]	0.24	GO:0007165;GO:0035556;GO:0005886;GO:0016021;GO:0004383;GO:0004672;GO:0005524	BP:signal transduction;BP:intracellular signal transduction;CC:plasma membrane;CC:integral component of membrane;MF:guanylate cyclase activity;MF:protein kinase activity;MF:ATP binding;	K01769	E4.6.1.2	map00230	Purine metabolism	COG2114	T:Signal transduction mechanisms	sp|Q07553|GCY3E_DROME;	Guanylate cyclase 32E OS=Drosophila melanogaster OX=7227 GN=Gyc32E PE=1 SV=4;	PF00211;PF07714;PF00069;PF07701	Guanylate_cyc;Pkinase_Tyr;Pkinase;HNOBA	Adenylate and Guanylate cyclase catalytic domain;Protein tyrosine kinase;Protein kinase domain;Heme NO binding associated
TRINITY_DN24732_c0_g2	-1.93466	0.000976805	0.00511966	down	-2.87105	2.51646e-08	4.59437e-07	down	PREDICTED: kelch-like protein 26 [Dendroctonus ponderosae] >XP_019763085.1 PREDICTED: kelch-like protein 26 [Dendroctonus ponderosae] >XP_019763086.1 PREDICTED: kelch-like protein 26 [Dendroctonus ponderosae] >XP_019763087.1 PREDICTED: kelch-like protein 26 [Dendroctonus ponderosae] >XP_019763088.1 PREDICTED: kelch-like protein 26 [Dendroctonus ponderosae] >XP_019763090.1 PREDICTED: kelch-like pr…	12.94	------	------	K10463	KLHL26	------	------	ENOG410XNX8	S:Function unknown	sp|Q5RGB8|KLH26_DANRE;	Kelch-like protein 26 OS=Danio rerio OX=7955 GN=klhl26 PE=4 SV=1;	PF01344;PF00651;PF13964;PF13418;PF07646;PF13415;PF07707;PF13854	Kelch_1;BTB;Kelch_6;Kelch_4;Kelch_2;Kelch_3;BACK;Kelch_5	Kelch motif;BTB/POZ domain;Kelch motif;Galactose oxidase, central domain;Kelch motif;Galactose oxidase, central domain;BTB And C-terminal Kelch;Kelch motif
TRINITY_DN24734_c0_g1	-2.29966	0.00104233	0.00539323	down	-3.18711	4.80972e-05	0.000353443	down	hypothetical protein YQE_08478, partial [Dendroctonus ponderosae] >ERL87176.1 hypothetical protein D910_04576 [Dendroctonus ponderosae]	12.08	GO:0006361;GO:0005634;GO:0001042;GO:0001181;GO:0003743	BP:transcription initiation from RNA polymerase I promoter;CC:nucleus;MF:RNA polymerase I core binding;MF:transcription factor activity, core RNA polymerase I binding;MF:translation initiation factor activity;	K15216	RRN3, TIFIA	------	------	ENOG410XRJJ	K:Transcription	------	------	PF05327	RRN3	RNA polymerase I specific transcription initiation factor RRN3
TRINITY_DN24735_c1_g2	1.64348	1.73872e-05	0.000174037	up	2.1944	4.48817e-05	0.000333577	up	unknown [Dendroctonus ponderosae]	14.8	GO:0008233	MF:peptidase activity;	K01376	UFSP2	------	------	ENOG410XTJE	O:Posttranslational modification, protein turnover, chaperones	sp|Q9VUR0|UFSP2_DROME;	Probable Ufm1-specific protease 2 OS=Drosophila melanogaster OX=7227 GN=UFSP2 PE=2 SV=1;	PF07910	Peptidase_C78	Peptidase family C78
TRINITY_DN24741_c0_g1	-2.54435	4.40776e-11	2.03929e-09	down	-1.10581	0.000881105	0.00428089	down	PREDICTED: probable cation-transporting ATPase 13A3, partial [Dendroctonus ponderosae]	18.38	GO:0006812;GO:0006874;GO:0016021;GO:0005623;GO:0000166;GO:0016887;GO:0046872;GO:0005524	BP:cation transport;BP:cellular calcium ion homeostasis;CC:integral component of membrane;CC:cell;MF:nucleotide binding;MF:ATPase activity;MF:metal ion binding;MF:ATP binding;	K14951	ATP13A3_4_5	------	------	ENOG410XRCA	U:Intracellular trafficking, secretion, and vesicular transport	sp|Q9H7F0|AT133_HUMAN;	Probable cation-transporting ATPase 13A3 OS=Homo sapiens OX=9606 GN=ATP13A3 PE=1 SV=4;	PF00122;PF00702;PF13246;PF00690	E1-E2_ATPase;Hydrolase;Cation_ATPase;Cation_ATPase_N	E1-E2 ATPase;haloacid dehalogenase-like hydrolase;Cation transport ATPase;Cation transporter/ATPase, N-terminus
TRINITY_DN24744_c0_g3	1.92784	0.00114308	0.00581177	up	-1.91257	5.63257e-08	9.34782e-07	down	hypothetical protein D910_09063 [Dendroctonus ponderosae]	3.32	GO:0006623;GO:0005623;GO:0003723	BP:protein targeting to vacuole;CC:cell;MF:RNA binding;	------	------	------	------	ENOG410ZQFB	S:Function unknown	sp|Q29NZ8|FUZZY_DROPS;	Protein fuzzy homolog OS=Drosophila pseudoobscura pseudoobscura OX=46245 GN=fuz PE=3 SV=1;	------	------	------
TRINITY_DN24756_c0_g1	-2.2025	7.10163e-06	8.0885e-05	down	-2.42846	4.34455e-14	2.59804e-12	down	PREDICTED: retinoblastoma-like protein 2 isoform X2 [Dendroctonus ponderosae] >ENN73092.1 hypothetical protein YQE_10296, partial [Dendroctonus ponderosae]	9.62	GO:0007346;GO:2000134;GO:0051726;GO:0030154;GO:0006357;GO:0005667;GO:0005634;GO:0000785;GO:0001012;GO:0001102	BP:regulation of mitotic cell cycle;BP:negative regulation of G1/S transition of mitotic cell cycle;BP:regulation of cell cycle;BP:cell differentiation;BP:regulation of transcription from RNA polymerase II promoter;CC:transcription factor complex;CC:nucleus;CC:chromatin;MF:RNA polymerase II regulatory region DNA binding;MF:RNA polymerase II activating transcription factor binding;	K04681	RBL1	map04110;map04350;map05203	Cell cycle;TGF-beta signaling pathway;Viral carcinogenesis	ENOG410XQF7	K:Transcription	sp|Q64701|RBL1_MOUSE;	Retinoblastoma-like protein 1 OS=Mus musculus OX=10090 GN=Rbl1 PE=1 SV=3;	PF01858;PF01857;PF11934	RB_A;RB_B;DUF3452	Retinoblastoma-associated protein A domain;Retinoblastoma-associated protein B domain;Domain of unknown function
TRINITY_DN24763_c0_g4	2.01481	3.59022e-05	0.00032146	up	4.13533	9.41402e-12	3.63303e-10	up	PREDICTED: THAP domain-containing protein 1-like [Acyrthosiphon pisum]	5.18	GO:0003677	MF:DNA binding;	------	------	------	------	ENOG410Z518;ENOG4111TBC;ENOG4111FGC;ENOG41122AW	S:Function unknown;K:Transcription;S:Function unknown	sp|Q2TBI2|THAP4_BOVIN;	THAP domain-containing protein 4 OS=Bos taurus OX=9913 GN=THAP4 PE=2 SV=2;	PF05485	THAP	THAP domain
TRINITY_DN24770_c0_g1	-2.45195	2.3069e-07	4.15001e-06	down	-2.81936	1.21991e-08	2.41584e-07	down	PREDICTED: Niemann-Pick C1 protein isoform X2 [Dendroctonus ponderosae]	18.62	GO:0016021;GO:0005319	CC:integral component of membrane;MF:lipid transporter activity;	K12385	NPC1	map04142	Lysosome	ENOG410XR54	S:Function unknown	sp|P56941|NPC1_PIG;	NPC intracellular cholesterol transporter 1 OS=Sus scrofa OX=9823 GN=NPC1 PE=2 SV=1;	PF02460;PF16414;PF12349	Patched;NPC1_N;Sterol-sensing	Patched family;Niemann-Pick C1 N terminus;Sterol-sensing domain of SREBP cleavage-activation
TRINITY_DN24778_c4_g2	-1.57897	0.00107238	0.00551654	down	1.4259	0.00224378	0.00937817	up	PREDICTED: exocyst complex component 4-like [Dendroctonus ponderosae] >XP_019772912.1 PREDICTED: exocyst complex component 4-like [Dendroctonus ponderosae]	8.12	GO:0006893;GO:0006612;GO:0090522;GO:0006904;GO:0006887;GO:0007268;GO:0000145;GO:0045202;GO:0032584	BP:Golgi to plasma membrane transport;BP:protein targeting to membrane;BP:vesicle tethering involved in exocytosis;BP:vesicle docking involved in exocytosis;BP:exocytosis;BP:chemical synaptic transmission;CC:exocyst;CC:synapse;CC:growth cone membrane;	K06111	EXOC4, SEC8	------	------	ENOG410Z8N0	U:Intracellular trafficking, secretion, and vesicular transport	sp|Q9VNH6|EXOC4_DROME;	Exocyst complex component 4 OS=Drosophila melanogaster OX=7227 GN=Sec8 PE=1 SV=3;	PF04048;PF10475	Sec8_exocyst;Vps54_N	Sec8 exocyst complex component specific domain;Vacuolar-sorting protein 54, of GARP complex
TRINITY_DN24790_c2_g4	5.6311	2.50868e-05	0.000236008	up	6.39681	7.98552e-06	7.53481e-05	up		0	------	------	------	------	------	------	------	------	------	------	------	------	------
TRINITY_DN24797_c0_g1	1.59491	5.25694e-05	0.000443122	up	3.47207	7.27008e-07	9.03263e-06	up		4.48	------	------	------	------	------	------	------	------	------	------	------	------	------
TRINITY_DN24815_c2_g1	-2.61429	7.61736e-11	3.36313e-09	down	-3.42883	4.41257e-07	5.8761e-06	down	PREDICTED: fumarate hydratase, mitochondrial-like [Dendroctonus ponderosae] >AEE62611.1 unknown [Dendroctonus ponderosae]	141.59	GO:0006525;GO:0006099;GO:0006106;GO:0006108;GO:0005739;GO:0045239;GO:0004053;GO:0004333;GO:0046872	BP:arginine metabolic process;BP:tricarboxylic acid cycle;BP:fumarate metabolic process;BP:malate metabolic process;CC:mitochondrion;CC:tricarboxylic acid cycle enzyme complex;MF:arginase activity;MF:fumarate hydratase activity;MF:metal ion binding;	K01679	E4.2.1.2B, fumC, FH	map00020;map05211;map00620;map05200	Citrate cycl;Renal cell carcinoma;Pyruvate metabolism;Pathways in cancer	COG0114	C:Energy production and conversion	sp|P10173|FUMH_PIG;	Fumarate hydratase, mitochondrial OS=Sus scrofa OX=9823 GN=FH PE=1 SV=2;	PF00206;PF10415	Lyase_1;FumaraseC_C	Lyase;Fumarase C C-terminus
TRINITY_DN24826_c0_g1	1.69511	0.00143295	0.00698717	up	4.92995	2.60785e-08	4.7328e-07	up	PREDICTED: NEDD8 ultimate buster 1-like [Dendroctonus ponderosae] >ENN71893.1 hypothetical protein YQE_11430, partial [Dendroctonus ponderosae]	5.04	------	------	------	------	------	------	ENOG410ZK3P	K:Transcription	sp|Q9Y5A7|NUB1_HUMAN;	NEDD8 ultimate buster 1 OS=Homo sapiens OX=9606 GN=NUB1 PE=1 SV=2;	PF00627;PF18037;PF16678;PF00240	UBA;Ubiquitin_5;HOIP-UBA;ubiquitin	UBA/TS-N domain;Ubiquitin-like domain;HOIP UBA domain pair;Ubiquitin family
TRINITY_DN24844_c0_g1	-2.51586	8.47366e-06	9.40204e-05	down	-1.57345	9.65763e-05	0.000645497	down	PREDICTED: hillarin [Dendroctonus ponderosae] >ENN74667.1 hypothetical protein YQE_08784, partial [Dendroctonus ponderosae] >ERL92289.1 hypothetical protein D910_09606 [Dendroctonus ponderosae]	9.21	GO:0046872	MF:metal ion binding;	------	------	------	------	COG5279	D:Cell cycle control, cell division, chromosome partitioning	sp|Q0E908|HIL_DROME;	Hillarin OS=Drosophila melanogaster OX=7227 GN=Hil PE=1 SV=1;	PF00412	LIM	LIM domain
TRINITY_DN24845_c0_g1	-3.49323	3.94247e-07	6.61633e-06	down	4.56459	0.00225578	0.00941924	up		20.52	------	------	------	------	------	------	------	------	------	------	------	------	------
TRINITY_DN24853_c1_g3	1.3614	0.00041304	0.00251185	up	1.93353	1.14872e-05	0.000103566	up	PREDICTED: uncharacterized protein T28D9.3-like isoform X1 [Dendroctonus ponderosae] >ENN74515.1 hypothetical protein YQE_08839, partial [Dendroctonus ponderosae]	16.23	GO:0016021	CC:integral component of membrane;	K01080	PLPP1_2_3	map00565;map00564;map00561;map00600;map04975;map04072;map05231;map04666	Ether lipid metabolism;Glycerophospholipid metabolism;Glycerolipid metabolism;Sphingolipid metabolism;Fat digestion and absorption;Phospholipase D signaling pathway;Choline metabolism in cancer;Fc gamma R-mediated phagocytosis	COG0074;COG0671;ENOG410YQVM;ENOG4111W29	C:Energy production and conversion;I:Lipid transport and metabolism;S:Function unknown;S:Function unknown	sp|Q9V576|WUN_DROME;	Putative phosphatidate phosphatase OS=Drosophila melanogaster OX=7227 GN=wun PE=1 SV=2;	PF01569	PAP2	PAP2 superfamily
TRINITY_DN24857_c0_g3	-2.19545	5.3969e-08	1.1698e-06	down	-2.58757	0.000818421	0.0040235	down	PREDICTED: cadherin-23-like [Dendroctonus ponderosae]	4.04	GO:0007155;GO:0007156;GO:0016021;GO:0016020;GO:0005887;GO:0005886;GO:0005509	BP:cell adhesion;BP:homophilic cell adhesion via plasma membrane adhesion molecules;CC:integral component of membrane;CC:membrane;CC:integral component of plasma membrane;CC:plasma membrane;MF:calcium ion binding;	------	------	------	------	ENOG410YG0E;ENOG410XQHI;ENOG410XPEI	S:Function unknown;	sp|P58365|CAD23_RAT;	Cadherin-23 OS=Rattus norvegicus OX=10116 GN=Cdh23 PE=2 SV=1;	PF00028	Cadherin	Cadherin domain
TRINITY_DN24861_c0_g2	-1.45156	3.45111e-05	0.000311437	down	2.45433	2.58502e-07	3.63798e-06	up	PREDICTED: ubiquitin carboxyl-terminal hydrolase 7 [Dendroctonus ponderosae]	29.57	GO:0051090;GO:0031647;GO:0006511;GO:0016579;GO:0005829;GO:0005634;GO:0008134;GO:0004843;GO:0004197;GO:0036459	BP:regulation of sequence-specific DNA binding transcription factor activity;BP:regulation of protein stability;BP:ubiquitin-dependent protein catabolic process;BP:protein deubiquitination;CC:cytosol;CC:nucleus;MF:transcription factor binding;MF:thiol-dependent ubiquitin-specific protease activity;MF:cysteine-type endopeptidase activity;MF:thiol-dependent ubiquitinyl hydrolase activity;	K11838	USP7, UBP15	map04068;map05203;map05168;map05169	FoxO signaling pathway;Viral carcinogenesis;Herpes simplex infection;Epstein-Barr virus infection	COG5077	S:Function unknown	sp|Q93009|UBP7_HUMAN;	Ubiquitin carboxyl-terminal hydrolase 7 OS=Homo sapiens OX=9606 GN=USP7 PE=1 SV=2;	PF12436;PF14533;PF00443;PF13423;PF00917	USP7_ICP0_bdg;USP7_C2;UCH;UCH_1;MATH	ICP0-binding domain of Ubiquitin-specific protease 7;Ubiquitin-specific protease C-terminal;Ubiquitin carboxyl-terminal hydrolase;Ubiquitin carboxyl-terminal hydrolase;MATH domain
TRINITY_DN24862_c0_g1	-2.09451	1.33857e-05	0.000138886	down	-1.48099	0.000537154	0.00282501	down	hypothetical protein D910_03688 [Dendroctonus ponderosae]	6.92	GO:0016021	CC:integral component of membrane;	K14020	WFS1	map04141	Protein processing in endoplasmic reticulum	ENOG41101FG;ENOG4111MAM	S:Function unknown;U:Intracellular trafficking, secretion, and vesicular transport	sp|Q8IMZ9|WFS1_DROME;	Wolframin OS=Drosophila melanogaster OX=7227 GN=wfs1 PE=1 SV=2;	------	------	------
TRINITY_DN24871_c1_g6	2.26955	0.000332949	0.00209058	up	4.10154	1.20095e-14	8.23466e-13	up		38.11	------	------	------	------	------	------	------	------	------	------	------	------	------
TRINITY_DN24882_c0_g1	-2.59617	4.55329e-07	7.48611e-06	down	3.97814	4.46304e-11	1.51585e-09	up	PREDICTED: uncharacterized protein LOC109536852 [Dendroctonus ponderosae]	138.38	------	------	K06234	RAB23	------	------	ENOG410ZIVD;ENOG4110BDM	S:Function unknown;	sp|Q9ULC3|RAB23_HUMAN;	Ras-related protein Rab-23 OS=Homo sapiens OX=9606 GN=RAB23 PE=1 SV=1;	------	------	------
TRINITY_DN24884_c0_g1	-1.62263	3.93118e-05	0.000347353	down	1.55221	1.12624e-05	0.000101943	up	PREDICTED: glutathione synthetase-like isoform X1 [Dendroctonus ponderosae] >XP_019769298.1 PREDICTED: glutathione synthetase-like isoform X1 [Dendroctonus ponderosae] >XP_019769299.1 PREDICTED: glutathione synthetase-like isoform X1 [Dendroctonus ponderosae] >XP_019769300.1 PREDICTED: glutathione synthetase-like isoform X1 [Dendroctonus ponderosae]	27.08	GO:0004363;GO:0043295;GO:0000287;GO:0046872;GO:0005524;GO:0042803	MF:glutathione synthase activity;MF:glutathione binding;MF:magnesium ion binding;MF:metal ion binding;MF:ATP binding;MF:protein homodimerization activity;	K21456	GSS	map00270;map00480	Cysteine and methionine metabolism;Glutathione metabolism	ENOG410XPHH	I:Lipid transport and metabolism	sp|P46413|GSHB_RAT;	Glutathione synthetase OS=Rattus norvegicus OX=10116 GN=Gss PE=1 SV=1;	PF03917;PF03199	GSH_synth_ATP;GSH_synthase	Eukaryotic glutathione synthase, ATP binding domain;Eukaryotic glutathione synthase
TRINITY_DN24887_c0_g3	-1.69707	1.53612e-06	2.15136e-05	down	-3.89032	5.64939e-13	2.76245e-11	down	hypothetical protein D910_05351 [Dendroctonus ponderosae]	31.8	GO:0006493;GO:0035269;GO:0016021;GO:0005789;GO:0004169;GO:0090482;GO:0016757;GO:0000030	BP:protein O-linked glycosylation;BP:protein O-linked mannosylation;CC:integral component of membrane;CC:endoplasmic reticulum membrane;MF:dolichyl-phosphate-mannose-protein mannosyltransferase activity;MF:vitamin transmembrane transporter activity;MF:transferase activity, transferring glycosyl groups;MF:mannosyltransferase activity;	K00728	POMT, pmt	map00514;map00515	Other types of O-glycan biosynthesis;Mannose type O-glycan biosynthesis	COG1928	O:Posttranslational modification, protein turnover, chaperones	sp|Q2LZ62|POMT1_DROPS;	Protein O-mannosyltransferase 1 OS=Drosophila pseudoobscura pseudoobscura OX=46245 GN=rt PE=3 SV=2;	PF02366;PF02815	PMT;MIR	Dolichyl-phosphate-mannose-protein mannosyltransferase;MIR domain
TRINITY_DN24892_c2_g1	-2.21745	1.4661e-06	2.06908e-05	down	-2.08652	0.000139778	0.000888297	down	PREDICTED: uncharacterized protein LOC109538471 isoform X1 [Dendroctonus ponderosae]	12.58	------	------	------	------	------	------	ENOG410ZM5D;ENOG410Y937	S:Function unknown;	------	------	------	------	------
TRINITY_DN24895_c0_g1	-3.0166	1.70233e-13	1.32647e-11	down	-2.53221	3.88087e-06	3.96545e-05	down	PREDICTED: ER lumen protein-retaining receptor [Dendroctonus ponderosae] >ERL93016.1 hypothetical protein D910_10318 [Dendroctonus ponderosae]	91.77	GO:0006888;GO:0006621;GO:0015031;GO:0005794;GO:0005783;GO:0005801;GO:0016021;GO:0005789;GO:0046923	BP:ER to Golgi vesicle-mediated transport;BP:protein retention in ER lumen;BP:protein transport;CC:Golgi apparatus;CC:endoplasmic reticulum;CC:cis-Golgi network;CC:integral component of membrane;CC:endoplasmic reticulum membrane;MF:ER retention sequence binding;	K10949	KDELR	map05110	Vibrio cholerae infection	COG5196	U:Intracellular trafficking, secretion, and vesicular transport	sp|O76767|ERD2_DROME;	ER lumen protein-retaining receptor OS=Drosophila melanogaster OX=7227 GN=KdelR PE=2 SV=1;	PF00810	ER_lumen_recept	ER lumen protein retaining receptor
TRINITY_DN24900_c0_g1	-1.56247	0.00110262	0.005644	down	2.55595	7.6227e-07	9.42579e-06	up	hypothetical protein YQE_11339, partial [Dendroctonus ponderosae]	559.53	------	------	------	------	------	------	------	------	------	------	------	------	------
TRINITY_DN24924_c0_g1	-3.60587	6.84319e-06	7.8396e-05	down	-3.12763	9.19746e-05	0.000618556	down	hypothetical protein YQE_03658, partial [Dendroctonus ponderosae]	3.57	GO:0005634;GO:0008270;GO:0003676	CC:nucleus;MF:zinc ion binding;MF:nucleic acid binding;	------	------	------	------	------	------	------	------	PF13465;PF13894;PF00096;PF13912;PF12171;PF05605;PF15909;PF16622	zf-H2C2_2;zf-C2H2_4;zf-C2H2;zf-C2H2_6;zf-C2H2_jaz;zf-Di19;zf-C2H2_8;zf-C2H2_11	Zinc-finger double domain;C2H2-type zinc finger;Zinc finger, C2H2 type;C2H2-type zinc finger;Zinc-finger double-stranded RNA-binding;Drought induced 19 protein;C2H2-type zinc ribbon;zinc-finger C2H2-type
TRINITY_DN24929_c0_g1	1.02023	0.00164136	0.00781908	up	-1.82155	0.000979288	0.00467083	down	hypothetical protein D910_05156 [Dendroctonus ponderosae]	36.5	GO:0045454;GO:0055114;GO:0005737;GO:0016021;GO:0045174;GO:0004364;GO:0009055	BP:cell redox homeostasis;BP:oxidation-reduction process;CC:cytoplasm;CC:integral component of membrane;MF:glutathione dehydrogenas;MF:glutathione transferase activity;MF:electron carrier activity;	K00310	SE	map00480;map00790	Glutathione metabolism;Folate biosynthesis	ENOG410XSIX;ENOG410XP5T	O:Posttranslational modification, protein turnover, chaperones;	sp|Q0P5F3|LIN7C_BOVIN;	Protein lin-7 homolog C OS=Bos taurus OX=9913 GN=LIN7C PE=2 SV=1;	PF13417;PF13409;PF02798;PF13410;PF00462;PF17172;PF14497	GST_N_3;GST_N_2;GST_N;GST_C_2;Glutaredoxin;GST_N_4;GST_C_3	Glutathione S-transferase, N-terminal domain;Glutathione S-transferase, N-terminal domain;Glutathione S-transferase, N-terminal domain;Glutathione S-transferase, C-terminal domain;Glutaredoxin;Glutathione S-transferase N-terminal domain;Glutathione S-transferase, C-terminal domain
TRINITY_DN24941_c0_g4	3.12754	0.000403221	0.00246247	up	3.22525	0.00127705	0.00586849	up	hypothetical protein WH47_08397, partial [Habropoda laboriosa]	0.37	------	------	------	------	------	------	------	------	------	------	------	------	------
TRINITY_DN24947_c3_g1	-2.7049	3.86348e-07	6.49962e-06	down	-3.03168	1.90392e-23	5.60092e-21	down	hypothetical protein D910_12824, partial [Dendroctonus ponderosae]	14	GO:0006388;GO:0016772;GO:0003723	BP:tRNA splicing, via endonucleolytic cleavage and ligation;MF:transferase activity, transferring phosphorus-containing groups;MF:RNA binding;	K10669	TRPT1, TPT1	------	------	COG5260;COG1859	L:Replication, recombination and repair;J:Translation, ribosomal structure and biogenesis	sp|Q5EAR5|TRPT1_DANRE;	tRNA 2'-phosphotransferase 1 OS=Danio rerio OX=7955 GN=trpt1 PE=2 SV=2;	PF03828	PAP_assoc	Cid1 family poly A polymerase
TRINITY_DN24949_c0_g1	-4.76253	3.11055e-08	7.36002e-07	down	-8.82855	1.07859e-11	4.11556e-10	down	hypothetical protein YQE_08164, partial [Dendroctonus ponderosae]	37.85	GO:0046514;GO:0017040	BP:ceramide catabolic process;MF:ceramidase activity;	------	------	------	------	------	------	------	------	PF04734	Ceramidase_alk	Neutral/alkaline non-lysosomal ceramidase, N-terminal
TRINITY_DN24949_c0_g3	-1.58158	0.00077348	0.00422549	down	-4.10101	3.96776e-21	7.61767e-19	down	PREDICTED: neutral ceramidase [Dendroctonus ponderosae]	30.72	GO:0042759;GO:0046514;GO:0046512;GO:0005576;GO:0017040	BP:long-chain fatty acid biosynthetic process;BP:ceramide catabolic process;BP:sphingosine biosynthetic process;CC:extracellular region;MF:ceramidase activity;	K12349	ASAH2	map00600;map04071	Sphingolipid metabolism;Sphingolipid signaling pathway	ENOG410XQWE	S:Function unknown	sp|Q29C43|NCASE_DROPS;	Neutral ceramidase OS=Drosophila pseudoobscura pseudoobscura OX=46245 GN=CDase PE=3 SV=1;	PF04734;PF17048	Ceramidase_alk;Ceramidse_alk_C	Neutral/alkaline non-lysosomal ceramidase, N-terminal;Neutral/alkaline non-lysosomal ceramidase, C-terminal
TRINITY_DN24950_c0_g3	1.20974	0.000335517	0.00210269	up	2.10065	0.00021717	0.00130295	up	PREDICTED: zinc finger protein on ecdysone puffs [Dendroctonus ponderosae]	48.82	GO:0046982;GO:0008270;GO:0003676	MF:protein heterodimerization activity;MF:zinc ion binding;MF:nucleic acid binding;	------	------	------	------	ENOG4111SKG	S:Function unknown	sp|P41073|PEP_DROME;	Zinc finger protein on ecdysone puffs OS=Drosophila melanogaster OX=7227 GN=Pep PE=1 SV=1;	PF12874;PF12171	zf-met;zf-C2H2_jaz	Zinc-finger of C2H2 type;Zinc-finger double-stranded RNA-binding
TRINITY_DN24954_c0_g1	1.32275	0.00175878	0.00828373	up	2.89604	7.20499e-08	1.16397e-06	up	PREDICTED: protein SDE2 homolog [Dendroctonus ponderosae] >ENN70803.1 hypothetical protein YQE_12468, partial [Dendroctonus ponderosae] >ERL86255.1 hypothetical protein D910_03665 [Dendroctonus ponderosae]	12.51	GO:0016021;GO:0004252	CC:integral component of membrane;MF:serine-type endopeptidase activity;	------	------	------	------	ENOG4111WBQ	S:Function unknown	sp|Q7T293|SDE2_DANRE;	Replication stress response regulator SDE2 OS=Danio rerio OX=7955 GN=sde2 PE=2 SV=2;	PF13019	Sde2_N_Ubi	Silencing defective 2 N-terminal ubiquitin domain
TRINITY_DN24954_c2_g1	-2.65194	6.18991e-07	9.79066e-06	down	-1.97538	1.70316e-07	2.52553e-06	down	PREDICTED: abhydrolase domain-containing protein 2 [Dendroctonus ponderosae] >AEE63040.1 unknown [Dendroctonus ponderosae] >ENN74690.1 hypothetical protein YQE_08807, partial [Dendroctonus ponderosae] >ERL92269.1 hypothetical protein D910_09586 [Dendroctonus ponderosae]	36.34	GO:0048240;GO:0043401;GO:0046464;GO:0051793;GO:0044255;GO:0051792;GO:0036126;GO:0097524;GO:0016787;GO:0034338;GO:0016298;GO:0047372	BP:sperm capacitation;BP:steroid hormone mediated signaling pathway;BP:acylglycerol catabolic process;BP:medium-chain fatty acid catabolic process;BP:cellular lipid metabolic process;BP:medium-chain fatty acid biosynthetic process;CC:sperm flagellum;CC:sperm plasma membrane;MF:hydrolase activity;MF:short-chain carboxylesterase activity;MF:lipase activity;MF:acylglycerol lipase activity;	K13697	ABHD2	------	------	COG0429	S:Function unknown	sp|Q24093|ABHD2_DROME;	Abhydrolase domain-containing protein 2 OS=Drosophila melanogaster OX=7227 GN=Hydr2 PE=2 SV=2;	PF00561;PF12146	Abhydrolase_1;Hydrolase_4	alpha/beta hydrolase fold;Serine aminopeptidase, S33
TRINITY_DN24958_c1_g1	3.34264	0.00030982	0.00197084	up	4.80673	0.00196102	0.00839801	up	PREDICTED: girdin-like [Dendroctonus ponderosae]	0.31	------	------	------	------	------	------	------	------	------	------	------	------	------
TRINITY_DN24961_c0_g1	-1.6352	0.000166139	0.00117175	down	-4.37774	1.21129e-10	3.73619e-09	down	PREDICTED: zinc metalloproteinase-disintegrin-like EoMP06, partial [Dendroctonus ponderosae]	25.97	GO:0007229;GO:0016021;GO:0004222	BP:integrin-mediated signaling pathway;CC:integral component of membrane;MF:metalloendopeptidase activity;	------	------	------	------	ENOG410XX2M	S:Function unknown	sp|O43184|ADA12_HUMAN;	Disintegrin and metalloproteinase domain-containing protein 12 OS=Homo sapiens OX=9606 GN=ADAM12 PE=1 SV=3;	PF01421;PF08516;PF00200;PF01562;PF13688;PF13582;PF13574;PF13583	Reprolysin;ADAM_CR;Disintegrin;Pep_M12B_propep;Reprolysin_5;Reprolysin_3;Reprolysin_2;Reprolysin_4	Reprolysin;ADAM cysteine-rich;Disintegrin;Reprolysin family propeptide;Metallo-peptidase family M12;Metallo-peptidase family M12B Reprolysin-like;Metallo-peptidase family M12B Reprolysin-like;Metallo-peptidase family M12B Reprolysin-like
TRINITY_DN24969_c0_g2	-1.58064	6.94247e-05	0.000558362	down	2.4464	7.73484e-19	1.04626e-16	up	PREDICTED: IQ motif and SEC7 domain-containing protein 1 isoform X1 [Dendroctonus ponderosae] >XP_019765220.1 PREDICTED: IQ motif and SEC7 domain-containing protein 1 isoform X1 [Dendroctonus ponderosae]	16.8	GO:0032012;GO:0005086	BP:regulation of ARF protein signal transduction;MF:ARF guanyl-nucleotide exchange factor activity;	K12495	IQSEC	map04144	Endocytosis	COG5307	S:Function unknown	sp|Q6DN90|IQEC1_HUMAN;	IQ motif and SEC7 domain-containing protein 1 OS=Homo sapiens OX=9606 GN=IQSEC1 PE=1 SV=1;	PF01369;PF16453	Sec7;IQ_SEC7_PH	Sec7 domain;PH domain
TRINITY_DN24971_c0_g8	-2.18214	1.26676e-05	0.00013289	down	-2.59936	3.36868e-07	4.6476e-06	down	PREDICTED: vinexin-like [Dendroctonus ponderosae]	14.83	GO:0007155;GO:0007015	BP:cell adhesion;BP:actin filament organization;	------	------	------	------	ENOG4111VYY;ENOG4111GFH	S:Function unknown;	sp|P34258|YKA7_CAEEL;	Uncharacterized protein B0303.7 OS=Caenorhabditis elegans OX=6239 GN=B0303.7 PE=1 SV=5;	PF00018;PF14604;PF07653	SH3_1;SH3_9;SH3_2	SH3 domain;Variant SH3 domain;Variant SH3 domain
TRINITY_DN24975_c1_g2	-3.1305	2.45914e-07	4.37524e-06	down	-3.043	2.32868e-08	4.30323e-07	down	PREDICTED: rho GTPase-activating protein 100F isoform X2 [Tribolium castaneum]	4.32	GO:0007165	BP:signal transduction;	K20655	SYDE	------	------	ENOG410XYAD	O:Posttranslational modification, protein turnover, chaperones	sp|Q9V9S7|SYDE_DROME;	Rho GTPase-activating protein 100F OS=Drosophila melanogaster OX=7227 GN=RhoGAP100F PE=1 SV=2;	PF00620;PF00595	RhoGAP;PDZ	RhoGAP domain;PDZ domain
TRINITY_DN24989_c0_g1	-2.60499	5.43689e-12	3.05198e-10	down	-2.39514	9.98285e-05	0.000664031	down	PREDICTED: ATP-binding cassette sub-family G member 4 isoform X1 [Dendroctonus ponderosae]	19.01	GO:0055085;GO:0016021;GO:0005886;GO:0042626;GO:0016887;GO:0005524	BP:transmembrane transport;CC:integral component of membrane;CC:plasma membrane;MF:ATPase activity, coupled to transmembrane movement of substances;MF:ATPase activity;MF:ATP binding;	------	------	------	------	COG1131	V:Defense mechanisms	sp|Q9H172|ABCG4_HUMAN;	ATP-binding cassette sub-family G member 4 OS=Homo sapiens OX=9606 GN=ABCG4 PE=1 SV=2;	PF01061	ABC2_membrane	ABC-2 type transporter
TRINITY_DN24990_c0_g2	3.38561	0.00184164	0.00860374	up	6.46644	0.000669705	0.00340718	up		0.09	------	------	------	------	------	------	------	------	------	------	------	------	------
TRINITY_DN24996_c0_g3	3.63298	3.34067e-09	1.00976e-07	up	2.85215	9.92299e-05	0.00066053	up	hypothetical protein YQE_12467, partial [Dendroctonus ponderosae]	0.74	GO:0006486;GO:0000398;GO:0016021;GO:0000139;GO:0005681;GO:0008378	BP:protein glycosylation;BP:mRNA splicing, via spliceosome;CC:integral component of membrane;CC:Golgi membrane;CC:spliceosomal complex;MF:galactosyltransferase activity;	------	------	------	------	ENOG410ZZ1B	S:Function unknown	sp|Q9BYG0|B3GN5_HUMAN;	Lactosylceramide 1,3-N-acetyl-beta-D-glucosaminyltransferase OS=Homo sapiens OX=9606 GN=B3GNT5 PE=1 SV=1;	PF01762	Galactosyl_T	Galactosyltransferase
TRINITY_DN25011_c0_g1	-2.05982	0.000132864	0.000969637	down	2.36735	0.000338799	0.00190897	up	PREDICTED: molybdenum cofactor biosynthesis protein 1 isoform X1 [Dendroctonus ponderosae]	17.51	GO:0006777;GO:0019008;GO:0003824;GO:0046872;GO:0051539	BP:Mo-molybdopterin cofactor biosynthetic process;CC:molybdopterin synthase complex;MF:catalytic activity;MF:metal ion binding;MF:4 iron, 4 sulfur cluster binding;	K20967	MOCS1	map00790	Folate biosynthesis	COG0315;COG2896	H:Coenzyme transport and metabolism;	sp|Q1JQD7|MOCS1_BOVIN;	Molybdenum cofactor biosynthesis protein 1 OS=Bos taurus OX=9913 GN=MOCS1 PE=2 SV=2;	PF06463;PF04055;PF13353	Mob_synth_C;Radical_SAM;Fer4_12	Molybdenum Cofactor Synthesis C;Radical SAM superfamily;4Fe-4S single cluster domain
TRINITY_DN25014_c0_g1	3.06847	1.69069e-06	2.3322e-05	up	6.96146	9.53717e-05	0.000638343	up		4	------	------	------	------	------	------	------	------	------	------	------	------	------
TRINITY_DN25024_c0_g1	-2.03183	9.67421e-10	3.4028e-08	down	2.01053	4.03006e-13	2.02702e-11	up	PREDICTED: hepatic leukemia factor isoform X5 [Dendroctonus ponderosae]	33.08	GO:0006357;GO:0003700	BP:regulation of transcription from RNA polymerase II promoter;MF:transcription factor activity, sequence-specific DNA binding;	K09057	HLF	map04711	Circadian rhythm - fly	ENOG410YJ8G	K:Transcription	sp|Q16534|HLF_HUMAN;	Hepatic leukemia factor OS=Homo sapiens OX=9606 GN=HLF PE=2 SV=1;	PF07716;PF00170	bZIP_2;bZIP_1	Basic region leucine zipper;bZIP transcription factor
TRINITY_DN25026_c0_g2	2.43366	4.68398e-12	2.65645e-10	up	-1.47831	1.31333e-10	4.00565e-09	down	PREDICTED: GDP-L-fucose synthase [Dendroctonus ponderosae] >AEE63024.1 unknown [Dendroctonus ponderosae]	9	GO:0009226;GO:0050662;GO:0050577;GO:0016491	BP:nucleotide-sugar biosynthetic process;MF:coenzyme binding;MF:GDP-L-fucose synthase activity;MF:oxidoreductase activity;	K02377	TSTA3, fcl	map00520;map00051	Amino sugar and nucleotide sugar metabolism;Fructose and mannose metabolism	COG0451	S:Function unknown	sp|Q8K3X2|FCL_CRIGR;	GDP-L-fucose synthase OS=Cricetulus griseus OX=10029 GN=TSTA3 PE=2 SV=1;	PF01370;PF16363;PF04321;PF02719;PF01073	Epimerase;GDP_Man_Dehyd;RmlD_sub_bind;Polysacc_synt_2;3Beta_HSD	NAD dependent epimerase/dehydratase family;GDP-mannose 4,6 dehydratase;RmlD substrate binding domain;Polysaccharide biosynthesis protein;3-beta hydroxysteroid dehydrogenase/isomerase family
TRINITY_DN25026_c1_g2	-4.71211	2.4698e-12	1.48328e-10	down	-3.7205	6.08935e-09	1.29445e-07	down	PREDICTED: F-box/LRR-repeat protein 14 [Dendroctonus ponderosae] >ENN78241.1 hypothetical protein YQE_05392, partial [Dendroctonus ponderosae]	9.55	GO:0016567;GO:0006511;GO:0031146;GO:0016021;GO:0019005	BP:protein ubiquitination;BP:ubiquitin-dependent protein catabolic process;BP:SCF-dependent proteasomal ubiquitin-dependent protein catabolic process;CC:integral component of membrane;CC:SCF ubiquitin ligase complex;	K10280	FBXL14	------	------	ENOG410YK3H	S:Function unknown	sp|Q17R01|FXL14_BOVIN;	F-box/LRR-repeat protein 14 OS=Bos taurus OX=9913 GN=FBXL14 PE=2 SV=1;	PF13516;PF12799;PF13855;PF12937;PF00646	LRR_6;LRR_4;LRR_8;F-box-like;F-box	Leucine Rich repeat;Leucine Rich repeats;Leucine rich repeat;F-box-like;F-box domain
TRINITY_DN25032_c0_g4	-2.45391	6.48548e-09	1.81106e-07	down	-3.89832	1.30277e-07	1.98176e-06	down	PREDICTED: aspartic proteinase-like [Dendroctonus ponderosae] >ENN74588.1 hypothetical protein YQE_08711, partial [Dendroctonus ponderosae]	96.97	GO:0006508;GO:0008219;GO:0030163;GO:0005764;GO:0004190	BP:proteolysis;BP:cell death;BP:protein catabolic process;CC:lysosome;MF:aspartic-type endopeptidase activity;	K01379	CTSD	map05152;map04915;map04071;map04210;map04142;map04140	Tuberculosis;Estrogen signaling pathway;Sphingolipid signaling pathway;Apoptosis;Lysosome;Autophagy - animal	ENOG410XNV7	O:Posttranslational modification, protein turnover, chaperones	sp|Q03168|ASPP_AEDAE;	Lysosomal aspartic protease OS=Aedes aegypti OX=7159 GN=AAEL006169 PE=1 SV=2;	PF00026;PF14543	Asp;TAXi_N	Eukaryotic aspartyl protease;Xylanase inhibitor N-terminal
TRINITY_DN25034_c0_g2	-2.3563	3.55393e-09	1.06952e-07	down	-3.04302	4.54871e-06	4.57353e-05	down	PREDICTED: hydroxymethylglutaryl-CoA synthase 1 [Dendroctonus ponderosae] >AFI45053.1 3-hydroxy-3-methylglutaryl coenzyme A synthase [Dendroctonus ponderosae] >ENN70229.1 hypothetical protein YQE_13014, partial [Dendroctonus ponderosae] >ERL86923.1 hypothetical protein D910_04326 [Dendroctonus ponderosae]	42.19	GO:0016126;GO:0008299;GO:0006084;GO:0010142;GO:0004421	BP:sterol biosynthetic process;BP:isoprenoid biosynthetic process;BP:acetyl-CoA metabolic process;BP:farnesyl diphosphate biosynthetic process, mevalonate pathway;MF:hydroxymethylglutaryl-CoA synthase activity;	K01641	E2.3.3.10	map00650;map00280;map00072;map00900	Butanoate metabolism;Valine, leucine and isoleucine degradation;Synthesis and degradation of ketone bodies;Terpenoid backbone biosynthesis	COG3425	I:Lipid transport and metabolism	sp|P54961|HMCS1_BLAGE;	Hydroxymethylglutaryl-CoA synthase 1 OS=Blattella germanica OX=6973 GN=HMGCS-1 PE=2 SV=1;	PF08540;PF01154	HMG_CoA_synt_C;HMG_CoA_synt_N	Hydroxymethylglutaryl-coenzyme A synthase C terminal;Hydroxymethylglutaryl-coenzyme A synthase N terminal
TRINITY_DN25040_c0_g1	-2.10656	0.000494122	0.00291346	down	-2.68782	7.47239e-22	1.68258e-19	down	PREDICTED: inositol monophosphatase 2-like isoform X1 [Dendroctonus ponderosae]	8.45	GO:0006021;GO:0046854;GO:0007165;GO:0046855;GO:0008934;GO:0052832;GO:0052833;GO:0046872	BP:inositol biosynthetic process;BP:phosphatidylinositol phosphorylation;BP:signal transduction;BP:inositol phosphate dephosphorylation;MF:inositol monophosphate 1-phosphatase activity;MF:inositol monophosphate 3-phosphatase activity;MF:inositol monophosphate 4-phosphatase activity;MF:metal ion binding;	K01092	E3.1.3.25, IMPA, suhB	map04070;map00562	Phosphatidylinositol signaling system;Inositol phosphate metabolism	COG0483	G:Carbohydrate transport and metabolism	sp|P29219|IMPA1_XENLA;	Inositol monophosphatase 1 OS=Xenopus laevis OX=8355 GN=impa1 PE=2 SV=1;	PF00459	Inositol_P	Inositol monophosphatase family
TRINITY_DN25044_c0_g2	6.15358	0.00104427	0.00539834	up	6.89799	2.86298e-05	0.000227232	up	PREDICTED: A disintegrin and metalloproteinase with thrombospondin motifs 12-like [Dendroctonus ponderosae]	0.24	GO:0007229;GO:0004222	BP:integrin-mediated signaling pathway;MF:metalloendopeptidase activity;	------	------	------	------	ENOG410Y9WM;ENOG410XPKZ	S:Function unknown;	sp|Q68SA9|ATS7_MOUSE;	A disintegrin and metalloproteinase with thrombospondin motifs 7 OS=Mus musculus OX=10090 GN=Adamts7 PE=1 SV=3;	PF17771;PF05986;PF01421;PF13574;PF13688;PF13583;PF13582;PF00090	ADAM_CR_2;ADAM_spacer1;Reprolysin;Reprolysin_2;Reprolysin_5;Reprolysin_4;Reprolysin_3;TSP_1	ADAM cysteine-rich domain;ADAM-TS Spacer 1;Reprolysin;Metallo-peptidase family M12B Reprolysin-like;Metallo-peptidase family M12;Metallo-peptidase family M12B Reprolysin-like;Metallo-peptidase family M12B Reprolysin-like;Thrombospondin type 1 domain
TRINITY_DN25046_c0_g1	-4.57137	3.20313e-08	7.5111e-07	down	-5.23725	6.61505e-10	1.6734e-08	down	PREDICTED: uncharacterized protein LOC109540082 [Dendroctonus ponderosae] >AEE63007.1 unknown [Dendroctonus ponderosae]	8.98	------	------	------	------	------	------	ENOG410XRSQ;ENOG4111CA5	S:Function unknown;	sp|Q9VD09|PINTA_DROME;	Retinol-binding protein pinta OS=Drosophila melanogaster OX=7227 GN=pinta PE=2 SV=1;	------	------	------
TRINITY_DN25047_c0_g3	1.38793	0.0014297	0.00697505	up	3.38167	0.00152994	0.00681264	up	PREDICTED: uncharacterized protein LOC109533085 isoform X2 [Dendroctonus ponderosae] >XP_019753870.1 PREDICTED: uncharacterized protein LOC109533085 isoform X2 [Dendroctonus ponderosae] >XP_019753871.1 PREDICTED: uncharacterized protein LOC109533085 isoform X2 [Dendroctonus ponderosae] >XP_019753872.1 PREDICTED: uncharacterized protein LOC109533085 isoform X2 [Dendroctonus ponderosae]	18.13	GO:0005576;GO:0005615	CC:extracellular region;CC:extracellular space;	------	------	------	------	COG2340	S:Function unknown	sp|Q9CYL5|GAPR1_MOUSE;	Golgi-associated plant pathogenesis-related protein 1 OS=Mus musculus OX=10090 GN=Glipr2 PE=1 SV=3;	PF00188	CAP	Cysteine-rich secretory protein family
TRINITY_DN25062_c0_g2	1.37227	0.000545496	0.00316348	up	2.10849	0.000148295	0.000935577	up	PREDICTED: G-protein coupled receptor Mth2-like isoform X3 [Dendroctonus ponderosae]	24.54	GO:0016021;GO:0004930	CC:integral component of membrane;MF:G-protein coupled receptor activity;	------	------	------	------	ENOG4111I4H	M:Cell wall/membrane/envelope biogenesis	sp|Q95NQ0|MTH2_DROSI;	G-protein coupled receptor Mth2 OS=Drosophila simulans OX=7240 GN=mth2 PE=3 SV=1;	PF00002	7tm_2	7 transmembrane receptor
TRINITY_DN25063_c1_g1	-2.49875	6.81529e-05	0.000550709	down	-5.47083	3.10522e-10	8.59424e-09	down	PREDICTED: uncharacterized protein LOC109540696 [Dendroctonus ponderosae]	42.6	------	------	------	------	------	------	------	------	------	------	------	------	------
TRINITY_DN25066_c0_g3	1.22001	0.00211236	0.00962918	up	3.64992	1.32557e-15	1.06978e-13	up	PREDICTED: zinc finger protein chinmo-like isoform X1 [Dendroctonus ponderosae]	3.62	GO:0006357;GO:0005634;GO:0046983;GO:0003676	BP:regulation of transcription from RNA polymerase II promoter;CC:nucleus;MF:protein dimerization activity;MF:nucleic acid binding;	------	------	------	------	ENOG410Z05R	S:Function unknown	sp|Q9VQ30|CHNMO_DROME;	Zinc finger protein chinmo OS=Drosophila melanogaster OX=7227 GN=chinmo PE=1 SV=3;	PF00651;PF00096;PF13894;PF05605	BTB;zf-C2H2;zf-C2H2_4;zf-Di19	BTB/POZ domain;Zinc finger, C2H2 type;C2H2-type zinc finger;Drought induced 19 protein
TRINITY_DN25075_c0_g1	-3.31	3.70317e-06	4.61528e-05	down	4.38434	0.000331434	0.00187443	up		21.75	------	------	------	------	------	------	------	------	------	------	------	------	------
TRINITY_DN25084_c1_g3	-2.0347	1.15918e-05	0.000122869	down	4.54235	1.42913e-10	4.2942e-09	up	PREDICTED: nuclear factor 1 C-type isoform X4 [Dendroctonus ponderosae]	47.01	GO:0000122;GO:0006260;GO:0045944;GO:0005634;GO:0003700;GO:0003677;GO:0000981	BP:negative regulation of transcription from RNA polymerase II promoter;BP:DNA replication;BP:positive regulation of transcription from RNA polymerase II promoter;CC:nucleus;MF:transcription factor activity, sequence-specific DNA binding;MF:DNA binding;MF:RNA polymerase II transcription factor activity, sequence-specific DNA binding;	K09172	NFIN	------	------	ENOG410Y16G	K:Transcription	sp|Q90932|NFIX_CHICK;	Nuclear factor 1 X-type OS=Gallus gallus OX=9031 GN=NFIX PE=2 SV=1;	PF10524;PF03165;PF00859	NfI_DNAbd_pre-N;MH1;CTF_NFI	Nuclear factor I protein pre-N-terminus;MH1 domain;CTF/NF-I family transcription modulation region
TRINITY_DN25091_c1_g3	1.82838	1.79038e-06	2.44762e-05	up	2.41449	3.20525e-07	4.44229e-06	up		20.61	------	------	------	------	------	------	------	------	------	------	------	------	------
TRINITY_DN25096_c0_g1	-1.44594	8.08543e-05	0.000636696	down	-3.00424	7.7872e-08	1.24917e-06	down	PREDICTED: alpha-1,2-mannosyltransferase ALG9 [Dendroctonus ponderosae] >AEE62059.1 unknown [Dendroctonus ponderosae] >ENN76280.1 hypothetical protein YQE_07244, partial [Dendroctonus ponderosae]	20.56	GO:0016021;GO:0005789;GO:0005783;GO:0000030	CC:integral component of membrane;CC:endoplasmic reticulum membrane;CC:endoplasmic reticulum;MF:mannosyltransferase activity;	K03846	ALG9	map00510	N-Glycan biosynthesis	ENOG410XP6D	S:Function unknown	sp|Q8VDI9|ALG9_MOUSE;	Alpha-1,2-mannosyltransferase ALG9 OS=Mus musculus OX=10090 GN=Alg9 PE=2 SV=1;	PF03901	Glyco_transf_22	Alg9-like mannosyltransferase family
TRINITY_DN25100_c1_g3	-3.83478	9.85485e-06	0.000107311	down	5.38921	0.00220049	0.00924765	up		0.77	------	------	------	------	------	------	------	------	------	------	------	------	------
TRINITY_DN25103_c0_g1	-4.42036	3.95411e-12	2.28012e-10	down	-1.95403	0.000189075	0.00115567	down	PREDICTED: androgen-induced gene 1 protein-like [Dendroctonus ponderosae] >ENN70612.1 hypothetical protein YQE_12787, partial [Dendroctonus ponderosae] >ERL85849.1 hypothetical protein D910_03264 [Dendroctonus ponderosae]	94.94	GO:0016021	CC:integral component of membrane;	------	------	------	------	ENOG4111HQA;ENOG410XQQ3	S:Function unknown;	sp|Q8C138|ADTRP_MOUSE;	Androgen-dependent TFPI-regulating protein OS=Mus musculus OX=10090 GN=Adtrp PE=2 SV=2;	PF04750	Far-17a_AIG1	FAR-17a/AIG1-like protein
TRINITY_DN25111_c1_g1	-5.86325	8.46825e-19	1.72539e-16	down	-5.14648	4.50525e-12	1.85488e-10	down	PREDICTED: myosin heavy chain, muscle isoform X3 [Dendroctonus ponderosae]	1038.92	GO:0016459;GO:0005524;GO:0051015;GO:0003774	CC:myosin complex;MF:ATP binding;MF:actin filament binding;MF:motor activity;	K17751	MYH6_7	map05416;map04260;map04261	Viral myocarditis;Cardiac muscle contraction;Adrenergic signaling in cardiomyocytes	COG5022	Z:Cytoskeleton	sp|P05661|MYSA_DROME;	Myosin heavy chain, muscle OS=Drosophila melanogaster OX=7227 GN=Mhc PE=1 SV=4;	PF00063	Myosin_head	Myosin head
TRINITY_DN25118_c4_g2	-1.7621	0.000778708	0.0042473	down	2.35669	1.12593e-05	0.000101943	up	PREDICTED: LOW QUALITY PROTEIN: uncharacterized protein LOC109541401 [Dendroctonus ponderosae]	10.44	------	------	K06104	AMOTL	map04530	Tight junction	ENOG410XSY2;ENOG410Y65V;ENOG410ZRSQ;ENOG41118SV;ENOG410Z1M2;ENOG410YHU4;ENOG4111E2Z	Z:Cytoskeleton;S:Function unknown;S:Function unknown;S:Function unknown;S:Function unknown;S:Function unknown;S:Function unknown	------	------	------	------	------
TRINITY_DN25126_c0_g1	-3.26644	3.26869e-13	2.42341e-11	down	3.73778	0.000248478	0.0014624	up	PREDICTED: glutamate-gated chloride channel isoform X1 [Aethina tumida]	6.36	------	------	------	------	------	------	ENOG410XP43	F:Nucleotide transport and metabolism	sp|Q94900|GLUCL_DROME;	Glutamate-gated chloride channel OS=Drosophila melanogaster OX=7227 GN=GluClalpha PE=1 SV=2;	PF02931;PF02932	Neur_chan_LBD;Neur_chan_memb	Neurotransmitter-gated ion-channel ligand binding domain;Neurotransmitter-gated ion-channel transmembrane region
TRINITY_DN25142_c0_g2	-2.35218	2.16758e-11	1.09191e-09	down	-1.79203	5.86389e-07	7.54774e-06	down	hypothetical protein D910_12536 [Dendroctonus ponderosae]	21.66	GO:0055085;GO:0016021;GO:0003993	BP:transmembrane transport;CC:integral component of membrane;MF:acid phosphatase activity;	K19283	ACPP	------	------	ENOG410ZVBQ;ENOG41100X5;ENOG410XPWC	L:Replication, recombination and repair;G:Carbohydrate transport and metabolism;G:Carbohydrate transport and metabolism	sp|P15309|PPAP_HUMAN;	Prostatic acid phosphatase OS=Homo sapiens OX=9606 GN=ACPP PE=1 SV=3;	PF07690;PF00328	MFS_1;His_Phos_2	Major Facilitator Superfamily;Histidine phosphatase superfamily
TRINITY_DN25161_c0_g5	4.00598	0.00191038	0.00886575	up	4.81893	0.00147012	0.00659945	up		0.1	------	------	------	------	------	------	------	------	------	------	------	------	------
TRINITY_DN25186_c0_g1	-3.81532	2.50886e-05	0.000236008	down	-1.59303	4.94272e-05	0.000362195	down	PREDICTED: facilitated trehalose transporter Tret1-2 homolog isoform X1 [Dendroctonus ponderosae]	1.9	GO:0016021;GO:0005887;GO:0022857;GO:0005351	CC:integral component of membrane;CC:integral component of plasma membrane;MF:transmembrane transporter activity;MF:suga;	------	------	------	------	ENOG410XNQK	G:Carbohydrate transport and metabolism	sp|B0WC46|TRET1_CULQU;	Facilitated trehalose transporter Tret1 OS=Culex quinquefasciatus OX=7176 GN=Tret1 PE=3 SV=1;	PF00083;PF07690;PF13347;PF03137	Sugar_tr;MFS_1;MFS_2;OATP	Sugar;Major Facilitator Superfamily;MFS/sugar transport protein;Organic Anion Transporter Polypeptide
TRINITY_DN25194_c0_g1	-2.12518	4.79288e-05	0.000409292	down	2.82844	0.000514803	0.00272238	up	PREDICTED: glutamate receptor ionotropic, kainate 2-like isoform X1 [Dendroctonus ponderosae]	8.64	GO:0016021;GO:0004970	CC:integral component of membrane;MF:ionotropic glutamate receptor activity;	K05313	GRIN	------	------	ENOG410XPSH;ENOG410XQQV;ENOG410Y9VH;ENOG410XW2A	U:Intracellular trafficking, secretion, and vesicular transport;S:Function unknown;P:Inorganic ion transport and metabolism;P:Inorganic ion transport and metabolism	sp|Q13002|GRIK2_HUMAN;	Glutamate receptor ionotropic, kainate 2 OS=Homo sapiens OX=9606 GN=GRIK2 PE=1 SV=1;	PF10613;PF00497	Lig_chan-Glu_bd;SBP_bac_3	Ligated ion channel L-glutamate- and glycine-binding site;Bacterial extracellular solute-binding proteins, family 3
TRINITY_DN25195_c0_g1	-2.02399	0.00140826	0.00689368	down	-5.56991	1.58254e-28	9.95309e-26	down	PREDICTED: probable multidrug resistance-associated protein letha	9.56	GO:0055085;GO:0016021;GO:0016020;GO:0042626;GO:0016887;GO:0005524	BP:transmembrane transport;CC:integral component of membrane;CC:membrane;MF:ATPase activity, coupled to transmembrane movement of substances;MF:ATPase activity;MF:ATP binding;	K05673	ABCC4	map04024;map01523;map02010;map04976	cAMP signaling pathway;Antifolate resistance;ABC transporters;Bile secretion	COG1132	V:Defense mechanisms	sp|P91660|L259_DROME;	Probable multidrug resistance-associated protein letha;	PF00664;PF00005;PF13555	ABC_membrane;ABC_tran;AAA_29	ABC transporter transmembrane region;ABC transporter;P-loop containing region of AAA domain
TRINITY_DN25200_c0_g1	2.09354	1.97447e-07	3.63763e-06	up	-1.88534	1.11096e-06	1.32263e-05	down	hypothetical protein YQE_06017, partial [Dendroctonus ponderosae]	9.77	GO:0035621;GO:0035627;GO:0120009;GO:0005794;GO:0005829;GO:0005581;GO:1902387;GO:0008289;GO:0070273;GO:0008234;GO:1902388	BP:ER to Golgi ceramide transport;BP:ceramide transport;BP:intermembrane lipid transfer;CC:Golgi apparatus;CC:cytosol;CC:collagen trimer;MF:ceramide 1-phosphate binding;MF:lipid binding;MF:phosphatidylinositol-4-phosphate binding;MF:cysteine-type peptidase activity;MF:ceramide 1-phosphate transporter activity;	K08283	COL4A3BP	------	------	ENOG410XQTB	U:Intracellular trafficking, secretion, and vesicular transport	sp|Q6VVX2|C43BP_CRIGR;	Collagen type IV alpha-3-binding protein OS=Cricetulus griseus OX=10029 GN=COL4A3BP PE=1 SV=1;	PF00169;PF15409;PF15413	PH;PH_8;PH_11	PH domain;Pleckstrin homology domain;Pleckstrin homology domain
TRINITY_DN25208_c0_g2	-2.41719	6.69518e-05	0.000542438	down	-5.89245	7.58902e-21	1.41241e-18	down	hypothetical protein YQE_08244, partial [Dendroctonus ponderosae]	4.95	GO:0042908;GO:0016021;GO:0008559;GO:0016887;GO:0005524	BP:xenobiotic transport;CC:integral component of membrane;MF:xenobiotic-transporting ATPase activity;MF:ATPase activity;MF:ATP binding;	K05673	ABCC4	map04024;map01523;map02010;map04976	cAMP signaling pathway;Antifolate resistance;ABC transporters;Bile secretion	COG1132	V:Defense mechanisms	sp|P91660|L259_DROME;	Probable multidrug resistance-associated protein letha;	PF00664;PF00005	ABC_membrane;ABC_tran	ABC transporter transmembrane region;ABC transporter
TRINITY_DN25220_c0_g2	3.08365	5.81714e-06	6.79721e-05	up	8.25577	9.15447e-18	1.07031e-15	up		17.59	------	------	------	------	------	------	------	------	------	------	------	------	------
TRINITY_DN25225_c0_g1	2.31292	3.82737e-09	1.13788e-07	up	-1.41686	0.000113589	0.000742831	down	hypothetical protein YQE_09829, partial [Dendroctonus ponderosae]	21.49	GO:0009156;GO:0009165;GO:0009116;GO:0016301;GO:0000287;GO:0004749	BP:ribonucleoside monophosphate biosynthetic process;BP:nucleotide biosynthetic process;BP:nucleoside metabolic process;MF:kinase activity;MF:magnesium ion binding;MF:ribose phosphate diphosphokinase activity;	K00948	PRPS, prsA	map00030;map00230	Pentose phosphate pathway;Purine metabolism	COG0462	F:Nucleotide transport and metabolism	sp|Q5ZI49|PRPS2_CHICK;	Ribose-phosphate pyrophosphokinase 2 OS=Gallus gallus OX=9031 GN=PRPS2 PE=2 SV=1;	PF14572;PF13793;PF00156;PF14681	Pribosyl_synth;Pribosyltran_N;Pribosyltran;UPRTase	Phosphoribosyl synthetase-associated domain;N-terminal domain of ribose phosphate pyrophosphokinase;Phosphoribosyl transferase domain;Uracil phosphoribosyltransferase
TRINITY_DN25225_c0_g2	1.30335	0.000262773	0.00171969	up	-1.72183	0.00015692	0.000983929	down	PREDICTED: ubiquitin-conjugating enzyme E2-22 kDa [Dendroctonus ponderosae] >ENN73582.1 hypothetical protein YQE_09830, partial [Dendroctonus ponderosae] >ERL85603.1 hypothetical protein D910_03022 [Dendroctonus ponderosae]	36.06	GO:0005634;GO:0016740;GO:0061631;GO:0005524	CC:nucleus;MF:transferase activity;MF:ubiquitin conjugating enzyme activity;MF:ATP binding;	K04649	HIP2, UBC1	map04120	Ubiquitin mediated proteolysis	COG5078	S:Function unknown	sp|P52486|UBCD4_DROME;	Ubiquitin-conjugating enzyme E2-22 kDa OS=Drosophila melanogaster OX=7227 GN=Ubc4 PE=1 SV=2;	PF00179;PF14461;PF00627	UQ_con;Prok-E2_B;UBA	Ubiquitin-conjugating enzyme;Prokaryotic E2 family B;UBA/TS-N domain
TRINITY_DN25238_c1_g1	1.32306	0.00213794	0.00970721	up	2.30282	2.61751e-05	0.000210312	up	longitudinals lacking protein, isoforms N/O/W/X/Y isoform X18 [Leptinotarsa decemlineata]	4.05	GO:0003676	MF:nucleic acid binding;	------	------	------	------	COG5048;ENOG410YPVD;ENOG41119EC	S:Function unknown;	sp|Q9V5M3|LOLA6_DROME;	Longitudinals lacking protein, isoforms N/O/W/X/Y OS=Drosophila melanogaster OX=7227 GN=lola PE=1 SV=3;	PF12874	zf-met	Zinc-finger of C2H2 type
TRINITY_DN25244_c0_g1	-3.08884	7.62102e-12	4.12859e-10	down	-3.68248	1.59735e-12	7.21142e-11	down	PREDICTED: zinc carboxypeptidase-like [Dendroctonus ponderosae]	158.66	GO:0006508;GO:0005615;GO:0004181;GO:0008270	BP:proteolysis;CC:extracellular space;MF:metallocarboxypeptidase activity;MF:zinc ion binding;	------	------	------	------	COG2866	E:Amino acid transport and metabolism	sp|O02350|CBPA1_ANOGA;	Zinc carboxypeptidase A 1 OS=Anopheles gambiae OX=7165 GN=AGAP009593 PE=2 SV=3;	PF00246;PF02244	Peptidase_M14;Propep_M14	Zinc carboxypeptidase;Carboxypeptidase activation peptide
TRINITY_DN25249_c1_g1	-3.01307	1.03493e-08	2.77725e-07	down	-3.52383	6.28234e-08	1.02673e-06	down	PREDICTED: uncharacterized protein LOC109540018 [Dendroctonus ponderosae] >XP_019763703.1 PREDICTED: uncharacterized protein LOC109540018 [Dendroctonus ponderosae] >XP_019763704.1 PREDICTED: uncharacterized protein LOC109540018 [Dendroctonus ponderosae] >XP_019763705.1 PREDICTED: uncharacterized protein LOC109540018 [Dendroctonus ponderosae] >XP_019763706.1 PREDICTED: uncharacterized protein LOC1…	2.33	GO:0016021	CC:integral component of membrane;	------	------	------	------	ENOG4110SGG	S:Function unknown	------	------	------	------	------
[truncated: 415 more rows]

## Sheet: adult
Gene_id	Log2FC(CA/NA)	A-Pvalue	A-Padjust	A-Regulate	NR description	B2_3	GO_id	GO_term	KO_id	KO_name	Pathway_id	Pathway_definition	COG_id	COG_Functional Categories	Swiss-Prot_hit-name	Swiss-Prot_description	Pfam_id	Domain	Domain description
[truncated: 1,140 more rows]

[truncated: 1 more sheets: larva]
